# Supplementary material for: MYB transcription factors in alfalfa (Medicago sativa): genome-wide identification and expression analysis under abiotic stresses
Source: PeerJ. 2019 Sep 17;7:e7714. doi: 10.7717/peerj.7714 (PMC6753925; doi:10.7717/peerj.7714)
Supplement: Supplemental Information 10 [file peerj-07-7714-s010.xls]

## Sheet: Sheet1
Table S3. Summary of the MYB transcription factor genes in alfalfa.
Gene name	Ms ID	Number of amino acids	Molecular weight/D	Theoretical pI	GRAVY	Homologous gene	MYB group	Location
MsMYB001	MSAD_210823.t1	229	26313.7	6.35	-0.654	AT2G26960.1	R2R3	nucl
MsMYB002	MSAD_211364.t1	171	19233	9.4	-0.637	AT4G38620.1	R2R3	nucl
MsMYB003	MSAD_211637.t1	321	34687.4	8.9	-0.388	AT4G37260.1	R2R3	cyto
MsMYB004	MSAD_213535.t1	149	17371.7	9.42	-0.26	AT5G26660.1	R2R3	chlo
MsMYB005	MSAD_214975.t1	291	33815.5	8.14	-0.746	AT5G14340.1	R2R3	nucl
MsMYB006	MSAD_217691.t1	589	65533.6	8.42	-0.38	AT4G28100.1	R2R3	nucl
MsMYB007	MSAD_218154.t1	245	28248.1	5.25	-0.852	AT5G05790.2	R1	nucl
MsMYB008	MSAD_218522.t1	330	37181.1	5.81	-0.654	AT5G49620.1	R2R3	nucl
MsMYB009	MSAD_219073.t1	282	31921	8.24	-0.715	AT5G35550.1	R2R3	nucl
MsMYB010	MSAD_219184.t1	281	31349.3	6.55	-0.4	AT5G15310.1	R2R3	nucl
MsMYB011	MSAD_219217.t1	438	50289.3	5.69	-0.881	AT1G69560.2	R2R3	nucl
MsMYB012	MSAD_219916.t1	208	23854.7	6.07	-0.84	AT3G27810.1	R2R3	nucl
MsMYB013	MSAD_220982.t1	335	38222.1	5.41	-0.768	AT4G21440.1	R2R3	nucl
MsMYB014	MSAD_221355.t1	298	33260.3	6.93	-0.755	AT3G50060.1	R2R3	nucl
MsMYB015	MSAD_221641.t1	442	49892.3	9.19	-0.823	AT4G18770.1	R1R2R3	nucl
MsMYB016	MSAD_221678.t1	306	35621.2	5.86	-0.624	AT5G12870.1	R2R3	nucl
MsMYB017	MSAD_221977.t1	242	28103.4	5.28	-0.708	AT1G79180.1	R2R3	nucl
MsMYB018	MSAD_222238.t1	355	40405.9	6.75	-0.796	AT3G49690.1	R2R3	nucl
MsMYB019	MSAD_222259.t1	235	26481	9.61	-0.682	AT5G56840.1	R1	chlo
MsMYB020	MSAD_223018.t1	458	52616	6.25	-0.811	AT3G11440.2	R2R3	nucl
MsMYB021	MSAD_223019.t1	998	113159	6.54	-0.874	AT5G06100.1	R2R3	nucl
MsMYB022	MSAD_223406.t1	370	41851.8	5.42	-0.777	AT4G01680.1	R2R3	nucl
MsMYB023	MSAD_223436.t1	403	45798.3	6.05	-0.895	AT1G09540.1	R2R3	nucl
MsMYB024	MSAD_223829.t1	396	45187.4	6.36	-0.621	AT3G13890.2	R2R3	nucl
MsMYB025	MSAD_224151.t1	259	29092.7	6	-0.615	AT5G57620.1	R2R3	nucl
MsMYB026	MSAD_224379.t1	258	30284.1	9.28	-0.88	AT3G24310.1	R2R3	nucl
MsMYB027	MSAD_227519.t1	381	43068.5	6.22	-0.813	AT1G09540.1	R2R3	nucl
MsMYB028	MSAD_228168.t1	297	34177.1	7.99	-1.1	AT5G49330.1	R2R3	nucl
MsMYB029	MSAD_228784.t1	361	42022.1	5.82	-0.85	AT4G18770.1	R1R2R3	nucl
MsMYB030	MSAD_228866.t1	299	34622.2	4.92	-0.786	AT2G31180.1	R1R2R3	nucl
MsMYB031	MSAD_228963.t1	553	62270.7	8.21	-0.833	AT1G14350.2	R2R3	nucl
MsMYB032	MSAD_231710.t1	323	37006.2	5.63	-0.772	AT5G12870.1	R2R3	nucl
MsMYB033	MSAD_231836.t1	370	42376.1	4.9	-0.886	AT2G47460.1	R2R3	nucl
MsMYB034	MSAD_232444.t1	314	35352.8	8.55	-0.643	AT3G61250.1	R2R3	nucl
MsMYB035	MSAD_232883.t1	314	34600.9	8.78	-0.59	AT5G56840.1	R1	chlo
MsMYB036	MSAD_233086.t1	632	71136.9	8.99	-0.177	AT5G55970.3	R2R3	nucl
MsMYB037	MSAD_233524.t1	482	54903.8	5.46	-0.74	AT4G18770.1	R1R2R3	nucl
MsMYB038	MSAD_233543.t1	185	21070.2	9.27	-0.712	AT4G18770.1	R2R3	nucl
MsMYB039	MSAD_233548.t1	466	53278.4	9.26	-0.812	AT4G18770.1	R1R2R3	nucl
MsMYB040	MSAD_233710.t1	485	53519.8	5.39	-0.763	AT1G18330.2	R2R3	nucl
MsMYB041	MSAD_234746.t1	245	27733.7	5.99	-0.861	AT5G04760.1	R2R3	chlo
MsMYB042	MSAD_235617.t1	358	40684.1	5.48	-0.702	AT5G26660.1	R2R3	nucl
MsMYB043	MSAD_235749.t1	289	32122.9	8.48	-0.589	AT1G74840.1	R1	nucl
MsMYB044	MSAD_236415.t1	1433	156566	6.52	-0.459	AT3G52250.2	Atypical	chlo
MsMYB045	MSAD_237419.t1	740	83269.8	5.86	-0.687	AT5G06100.1	R2R3	nucl
MsMYB046	MSAD_237421.t1	448	51979.1	9.16	-0.823	AT2G32460.1	R2R3	nucl
MsMYB047	MSAD_238261.t1	81	9130.13	6.04	-0.743	AT2G21650.1	R1	nucl
MsMYB048	MSAD_238819.t1	319	35891.4	6.45	-0.64	AT3G49690.1	R2R3	nucl
MsMYB049	MSAD_239169.t1	366	40869.4	8.97	-0.46	AT1G69560.2	R2R3	chlo
MsMYB050	MSAD_239180.t1	354	39897.7	6.52	-0.682	AT1G08810.1	R2R3	nucl
MsMYB051	MSAD_239219.t1	257	29718.4	7.16	-0.84	AT3G46130.1	R2R3	nucl
MsMYB052	MSAD_239320.t1	334	37711.5	5.3	-0.796	AT3G08500.1	R2R3	nucl
MsMYB053	MSAD_239920.t1	154	17511.1	6.06	-0.264	AT4G38760.1	R1	nucl
MsMYB054	MSAD_241910.t1	240	27360.6	5.62	-0.671	AT5G23000.1	R2R3	nucl
MsMYB055	MSAD_242993.t1	339	38367.2	4.39	-0.566	AT3G23250.2	R1	mito
MsMYB056	MSAD_242995.t1	110	12846.8	9.35	-0.505	AT5G16770.4	R2R3	nucl
MsMYB057	MSAD_243112.t1	353	39599.5	6.31	-0.603	AT3G02940.3	R2R3	nucl
MsMYB058	MSAD_243604.t1	1022	113612	5.39	-0.723	AT4G32730.5	R1R2R3	nucl
MsMYB059	MSAD_244071.t1	259	29952.1	9.13	-0.765	AT1G66370.1	R2R3	nucl
MsMYB060	MSAD_244193.t1	261	29588.3	8.25	-0.826	AT5G35550.1	R2R3	nucl
MsMYB061	MSAD_244470.t1	206	23461.5	8.52	-0.708	AT3G23250.1	R2R3	nucl
MsMYB062	MSAD_245082.t1	346	39265.9	8.29	-0.676	AT5G58900.1	R1	nucl
MsMYB063	MSAD_245196.t1	321	36476.7	9.03	-0.8	AT5G58900.1	R2R3	nucl
MsMYB064	MSAD_245323.t1	324	36529.1	6.13	-0.674	AT5G56110.1	R2R3	nucl
MsMYB065	MSAD_246326.t1	914	100082	9.28	-0.806	AT5G58900.1	R2R3	chlo
MsMYB066	MSAD_247049.t1	283	32886.8	5.58	-0.798	AT4G25560.1	R2R3	nucl
MsMYB067	MSAD_247739.t1	93	10773.3	10.46	-0.86	AT5G47390.1	R1	nucl
MsMYB068	MSAD_247767.t1	630	68893.6	9.03	-0.819	AT5G58900.1	R2R3	cyto
MsMYB069	MSAD_247769.t1	207	23903.4	4.43	-0.875	AT2G26960.1	R1	nucl
MsMYB070	MSAD_247772.t1	462	51781.7	8.96	-0.786	AT5G58900.1	R2R3	vacu
MsMYB071	MSAD_247817.t1	1246	143080	5.17	-0.691	AT2G26950.1	Atypical	nucl
MsMYB072	MSAD_247825.t1	332	38063.8	4.97	-0.64	AT2G26960.1	R2R3	nucl
MsMYB073	MSAD_247921.t1	553	63437.5	9	-0.896	AT2G26950.1	R1R2R3	nucl
MsMYB074	MSAD_248375.t1	318	34339.7	9.14	-0.431	AT4G38620.1	R2R3	nucl
MsMYB075	MSAD_249029.t1	193	22263.6	9.49	-0.764	AT4G38620.1	R2R3	nucl
MsMYB076	MSAD_249275.t1	418	46958.8	6.3	-0.733	AT5G17300.1	R1	nucl
MsMYB077	MSAD_249374.t1	458	52161.5	8.71	-0.91	AT1G14350.2	R2R3	nucl
MsMYB078	MSAD_249753.t1	197	22728.5	6.23	-0.817	AT5G35550.1	R2R3	nucl
MsMYB079	MSAD_249873.t1	347	39730.8	6.01	-0.547	AT5G26660.1	R2R3	nucl
MsMYB080	MSAD_249909.t1	448	52125.5	6.9	-0.859	AT4G18770.1	R1R2R3	nucl
MsMYB081	MSAD_250377.t1	467	53234.6	5.88	-0.816	AT2G02820.2	R2R3	nucl
MsMYB082	MSAD_251189.t1	285	32252.8	9.46	-0.7	AT1G69560.2	R2R3	nucl
MsMYB083	MSAD_251194.t1	397	43757.3	7.14	-0.587	AT4G33450.1	R2R3	nucl
MsMYB084	MSAD_251196.t1	370	41255.3	8.59	-0.638	AT1G17950.1	R2R3	nucl
MsMYB085	MSAD_252816.t1	428	48598.2	5.53	-0.804	AT3G28470.1	R2R3	nucl
MsMYB086	MSAD_253210.t1	173	20688.1	4.78	-0.909	AT4G18770.1	R2R3	nucl
MsMYB087	MSAD_254515.t1	293	33346.2	8.97	-0.763	AT1G17950.1	R2R3	nucl
MsMYB088	MSAD_254836.t1	305	34387.6	8.07	-0.71	AT3G61250.1	R2R3	nucl
MsMYB089	MSAD_254848.t1	270	31020.9	9.23	-0.794	AT4G25560.1	R2R3	nucl
MsMYB090	MSAD_255431.t1	332	38016.8	5.68	-0.761	AT5G49330.1	R2R3	nucl
MsMYB091	MSAD_256074.t1	95	10803.4	8.55	-0.675	AT1G75250.1	R1	chlo
MsMYB092	MSAD_256812.t1	276	31610.6	5.28	-0.976	AT3G23250.1	R2R3	nucl
MsMYB093	MSAD_257884.t1	406	45892.7	6.28	-0.742	AT5G15310.1	R2R3	nucl
MsMYB094	MSAD_257905.t1	431	48190.3	5.68	-0.691	AT1G69560.1	R2R3	nucl
MsMYB095	MSAD_258275.t1	251	29018.7	7.01	-0.823	AT4G21440.1	R2R3	nucl
MsMYB096	MSAD_258280.t1	431	48963.4	4.8	-0.509	AT4G21440.1	R2R3	nucl
MsMYB097	MSAD_258507.t1	296	33947	7.56	-0.769	AT3G49690.1	R2R3	nucl
MsMYB098	MSAD_258797.t1	145	17145.4	6.65	-0.775	AT3G11440.4	R2R3	cyto
MsMYB099	MSAD_260349.t1	340	38553.8	7.16	-0.856	AT3G49690.1	R2R3	nucl
MsMYB100	MSAD_260360.t1	286	32019.3	6.08	-0.386	AT5G57620.1	R2R3	nucl
MsMYB101	MSAD_260526.t1	249	28345.8	5.4	-0.451	AT5G26660.1	R2R3	nucl
MsMYB102	MSAD_260968.t1	313	35272.3	7.15	-0.874	AT5G15310.1	R2R3	nucl
MsMYB103	MSAD_262251.t1	125	14167.1	9.99	-0.507	AT5G58900.1	R1	chlo
MsMYB104	MSAD_262748.t1	91	10300.5	9	-0.884	AT2G21650.1	R1	cyto
MsMYB105	MSAD_263886.t1	333	36464.3	9.1	-0.581	AT4G01280.1	R1	nucl
MsMYB106	MSAD_264483.t1	1050	118277	8.24	-0.893	AT3G18100.1	R2R3	nucl
MsMYB107	MSAD_264790.t1	131	15272.5	9.86	-0.487	AT2G38090.1	R1	chlo
MsMYB108	MSAD_264791.t1	105	12560.4	5.68	-0.49	AT2G38090.1	R1	nucl
MsMYB109	MSAD_265093.t1	468	53023.5	5.13	-0.879	AT5G06100.1	R2R3	nucl
MsMYB110	MSAD_266003.t1	316	36255.7	5.76	-0.699	AT1G74650.1	R2R3	nucl
MsMYB111	MSAD_267151.t1	326	37583.3	5.02	-0.789	AT5G16600.1	R2R3	nucl
MsMYB112	MSAD_267527.t1	313	35700	7.73	-0.788	AT2G38090.1	R2R3	nucl
MsMYB113	MSAD_268202.t1	296	33312.6	8.57	-0.635	AT4G38620.1	R2R3	nucl
MsMYB114	MSAD_269506.t1	316	36140.1	6.45	-0.826	AT3G06490.1	R2R3	nucl
MsMYB115	MSAD_269812.t1	546	61151.7	5.3	-0.718	AT3G11440.4	R2R3	nucl
MsMYB116	MSAD_270455.t1	345	38865.5	6.09	-0.734	AT5G16770.2	R2R3	nucl
MsMYB117	MSAD_270884.t1	264	29405.3	6.31	-0.506	AT5G57620.1	R2R3	nucl
MsMYB118	MSAD_270934.t1	274	30213.8	9.04	-0.634	AT5G56840.1	R1	nucl
MsMYB119	MSAD_271073.t1	409	46342.4	6.06	-0.706	AT1G69560.1	R2R3	nucl
MsMYB120	MSAD_271189.t1	339	38780.4	5.53	-0.724	AT3G08500.1	R2R3	nucl
MsMYB121	MSAD_271910.t1	465	53883.2	6.66	-0.892	AT4G18770.1	R1R2R3	nucl
MsMYB122	MSAD_273414.t1	328	36243.6	7.86	-0.873	AT5G08520.1	R1	nucl
MsMYB123	MSAD_273786.t1	135	15976.3	9.25	-0.523	AT3G46130.1	R2R3	nucl
MsMYB124	MSAD_274216.t1	222	25677.8	7.24	-0.886	AT5G08520.1	R2R3	nucl
MsMYB125	MSAD_274319.t1	309	34214.3	5.91	-0.647	AT3G09600.7	R1	nucl
MsMYB126	MSAD_274867.t1	349	39360.6	4.66	-0.676	AT1G79180.1	R2R3	nucl
MsMYB127	MSAD_275158.t1	91	10590.9	8	-0.945	AT4G39250.1	R1	cyto
MsMYB128	MSAD_275163.t1	92	10767.1	6.91	-0.976	AT1G75250.2	R1	nucl
MsMYB129	MSAD_276321.t1	225	25582	9.51	-0.82	AT3G50060.1	R2R3	nucl
MsMYB130	MSAD_276939.t1	347	40128.4	6.67	-0.656	AT5G26660.1	R2R3	nucl
MsMYB131	MSAD_278317.t1	218	24471	9.15	-0.562	AT1G22640.1	R2R3	nucl
MsMYB132	MSAD_278758.t1	363	39351.1	6.28	-0.512	AT3G09230.1	R2R3	nucl
MsMYB133	MSAD_279067.t1	297	33475.2	5.92	-0.792	AT3G61250.1	R2R3	nucl
MsMYB134	MSAD_279707.t1	307	35436.5	6.67	-0.928	AT2G38090.1	R2R3	nucl
MsMYB135	MSAD_279740.t1	353	40966.7	7.22	-0.9	AT5G58850.1	R1R2R3	nucl
MsMYB136	MSAD_280666.t1	307	34894.2	8.05	-0.844	AT5G35550.1	R2R3	nucl
MsMYB137	MSAD_283540.t1	255	28221.6	6.34	-0.555	AT1G34670.1	R2R3	nucl
MsMYB138	MSAD_283937.t1	532	61742.5	6.26	-0.969	AT2G26960.1	R1R2R3	nucl
MsMYB139	MSAD_283997.t1	368	41426.1	7.1	-0.695	AT1G09540.1	R2R3	nucl
MsMYB140	MSAD_284029.t1	333	37348.5	6.14	-0.633	AT1G09540.1	R2R3	nucl
MsMYB141	MSAD_284068.t1	388	44322.4	5.98	-0.825	AT4G01680.1	R2R3	nucl
MsMYB142	MSAD_284078.t1	620	71532.5	6.56	-0.909	AT2G26960.1	R1R2R3	nucl
MsMYB143	MSAD_284113.t1	278	31840.5	5.72	-0.654	AT2G47190.1	R2R3	nucl
MsMYB144	MSAD_284137.t1	259	29644.3	7.73	-0.734	AT1G48000.1	R2R3	nucl
MsMYB145	MSAD_284155.t1	264	30956.7	6.91	-1	AT3G24310.1	R2R3	nucl
MsMYB146	MSAD_284616.t1	219	25985.7	5.28	-1.089	AT3G53200.1	R2R3	nucl
MsMYB147	MSAD_285239.t1	374	42388.2	5.15	-0.826	AT5G49330.1	R2R3	nucl
MsMYB148	MSAD_286597.t1	442	49664.5	4.94	-0.91	AT2G32460.1	R2R3	nucl
MsMYB149	MSAD_286691.t1	481	55045.9	4.67	-0.649	AT2G31180.1	R2R3	nucl
MsMYB150	MSAD_286699.t1	271	30111.5	5.27	-0.642	AT4G28110.1	R2R3	nucl
MsMYB151	MSAD_287107.t1	387	44431.7	6.72	-0.88	AT4G18770.1	R2R3	nucl
MsMYB152	MSAD_287694.t1	349	39519.6	6.56	-0.617	AT5G16770.2	R2R3	nucl
MsMYB153	MSAD_287819.t1	317	35385	7.75	-0.912	AT3G13540.1	R2R3	nucl
MsMYB154	MSAD_288307.t1	1487	163094	6.27	-0.695	AT3G52250.2	R1R2R3	nucl
MsMYB155	MSAD_289628.t1	330	37474.5	5.37	-0.799	AT2G47460.1	R2R3	nucl
MsMYB156	MSAD_290181.t1	325	36414.7	6.91	-0.738	AT3G28910.1	R2R3	nucl
MsMYB157	MSAD_292081.t1	386	42900.6	5.37	-0.745	AT2G26960.1	R2R3	nucl
MsMYB158	MSAD_292993.t1	293	32899.4	7.79	-0.57	AT5G52660.2	R1	nucl
MsMYB159	MSAD_293480.t1	324	37108.4	6.61	-0.764	AT1G68320.1	R2R3	nucl
MsMYB160	MSAD_293725.t1	523	57710.5	6.28	-0.854	AT3G11440.4	R2R3	nucl
MsMYB161	MSAD_296112.t1	904	100825	5.29	-0.72	AT4G32730.5	R2R3	nucl
MsMYB162	MSAD_296412.t1	406	45737.7	6.38	-0.463	AT5G05790.2	R1	nucl
MsMYB163	MSAD_297359.t1	316	36826.1	9.39	-0.633	AT3G16350.1	R1	nucl
MsMYB164	MSAD_297806.t1	266	30687.7	8.92	-0.8	AT1G66370.1	R2R3	nucl
MsMYB165	MSAD_297814.t1	252	29334.1	6.4	-0.777	AT1G66370.1	R2R3	nucl
MsMYB166	MSAD_297817.t1	322	36909.9	9.2	-0.704	AT1G66370.1	R2R3	nucl
MsMYB167	MSAD_297821.t1	223	25997.8	9.72	-0.833	AT1G66370.1	R2R3	nucl
MsMYB168	MSAD_297825.t1	276	31805.4	8.53	-0.637	AT1G66370.1	R2R3	nucl
MsMYB169	MSAD_297845.t1	169	18824.5	9.46	-0.669	AT1G22640.3	R1	chlo
MsMYB170	MSAD_298327.t1	252	28692.7	4.82	-0.779	AT1G63910.1	R2R3	nucl
MsMYB171	MSAD_298548.t1	176	20374.5	6.33	-0.497	AT5G14340.1	R2R3	nucl
MsMYB172	MSAD_298601.t1	256	28557	6.97	-0.527	AT5G08520.1	R1	nucl
MsMYB173	MSAD_298605.t1	1879	208303	6.22	-0.486	AT5G08520.1	R1R2R3	nucl
MsMYB174	MSAD_298609.t1	240	26616.8	6.2	-0.486	AT5G08520.1	R1	nucl
MsMYB175	MSAD_298611.t1	436	48366.6	9.51	-0.535	AT3G16350.1	R1	nucl
MsMYB176	MSAD_298692.t1	183	20921.7	8.59	-0.614	AT5G58900.1	R1	cyto
MsMYB177	MSAD_300052.t1	260	29677.3	5.31	-0.723	AT3G23250.1	R2R3	nucl
MsMYB178	MSAD_300293.t1	240	28607.8	8.58	-1.101	AT1G17950.1	R2R3	nucl
MsMYB179	MSAD_300436.t1	242	27708.8	8.98	-0.532	AT5G04760.1	R1	nucl
MsMYB180	MSAD_300634.t1	192	22012.4	9.95	-0.419	AT1G74840.1	R1	nucl
MsMYB181	MSAD_302052.t1	92	10520.9	8.86	-0.799	AT2G21650.1	R1	cyto
MsMYB182	MSAD_302329.t1	324	37444.6	10.06	-0.994	AT4G18770.1	R1R2R3	nucl
MsMYB183	MSAD_302335.t1	413	47573.8	9.19	-0.857	AT4G18770.1	R1R2R3	nucl
MsMYB184	MSAD_303035.t1	514	59265.1	5.41	-0.847	AT3G23250.1	R1R2R3	nucl
MsMYB185	MSAD_304403.t1	112	12746.9	8.98	-0.279	AT4G32730.5	R2R3	cyto
MsMYB186	MSAD_304545.t1	229	26302.7	5.62	-0.664	AT1G66370.1	R2R3	nucl
MsMYB187	MSAD_304548.t1	293	33397.6	8.46	-0.548	AT2G31180.1	R2R3	vacu
MsMYB188	MSAD_304655.t1	93	10892.3	8.83	-1.001	AT4G39250.1	R1	nucl
MsMYB189	MSAD_305090.t1	846	94603.8	6.24	-0.623	AT4G26930.1	R2R3	nucl
MsMYB190	MSAD_305091.t1	449	52031.9	9.08	-0.87	AT5G06100.1	R2R3	nucl
MsMYB191	MSAD_305645.t1	208	24183.1	6.75	-0.942	AT3G27810.1	R2R3	nucl
MsMYB192	MSAD_305689.t1	329	36652.7	9.44	-0.971	AT4G21440.1	R2R3	nucl
MsMYB193	MSAD_306126.t1	238	26032.7	7.68	-0.706	AT4G37260.1	R2R3	nucl
MsMYB194	MSAD_306322.t1	384	43425.2	6.79	-0.633	AT1G09540.1	R2R3	nucl
MsMYB195	MSAD_306780.t1	326	35307.1	6.8	-0.717	AT5G47390.1	R1	nucl
MsMYB196	MSAD_306905.t1	272	30727.5	5.26	-0.692	AT4G12350.1	R2R3	nucl
MsMYB197	MSAD_308563.t1	229	25635	7.97	-0.477	AT5G58900.1	R1	nucl
MsMYB198	MSAD_308883.t1	478	54100.2	8.74	-0.623	AT5G02320.2	Atypical	nucl
MsMYB199	MSAD_308941.t1	338	38749.1	5.84	-0.701	AT1G63910.1	R2R3	nucl
MsMYB200	MSAD_309143.t1	504	55952.8	8.66	-0.706	AT5G02320.2	R2R3	nucl
MsMYB201	MSAD_309145.t1	369	42157	9.57	-0.795	AT2G37630.1	R2R3	chlo
MsMYB202	MSAD_309615.t1	286	31669.2	6.09	-0.594	AT2G36890.2	R2R3	nucl
MsMYB203	MSAD_310604.t1	288	32521.9	8.83	-0.565	AT4G01680.3	R2R3	nucl
MsMYB204	MSAD_310752.t1	349	37829.3	6.84	-0.576	AT3G16350.1	R1	chlo
MsMYB205	MSAD_311642.t1	334	37980.3	6.6	-0.871	AT3G47600.1	R2R3	nucl
MsMYB206	MSAD_312008.t1	318	34480.4	9.38	-0.731	AT1G70000.2	R1	nucl
MsMYB207	MSAD_312392.t1	741	82278.5	8.92	-0.527	AT5G08520.1	R1R2R3	nucl
MsMYB208	MSAD_312555.t1	349	39311.6	5.42	-0.79	AT5G57620.1	R2R3	nucl
MsMYB209	MSAD_312855.t1	348	39981.6	5.92	-0.669	AT3G13890.2	R2R3	nucl
MsMYB210	MSAD_312856.t1	349	40031.8	6.58	-0.652	AT3G13890.2	R2R3	nucl
MsMYB211	MSAD_312858.t1	339	38767.9	6.37	-0.542	AT3G13890.2	R2R3	nucl
MsMYB212	MSAD_312869.t1	486	55779.8	5.16	-0.626	AT3G13890.2	R2R3	nucl
MsMYB213	MSAD_313446.t1	143	15554.9	9.3	-0.024	AT5G47390.1	R1	golg
MsMYB214	MSAD_313487.t1	448	50720.7	8.78	-0.831	AT5G11050.1	R1R2R3	nucl
MsMYB215	MSAD_313730.t1	461	52734.9	6.36	-1.027	AT5G08520.1	R2R3	nucl
MsMYB216	MSAD_313734.t1	227	25889.1	9.25	-0.982	AT5G08520.1	R2R3	nucl
MsMYB217	MSAD_313735.t1	317	35290.2	6.93	-0.958	AT5G08520.1	R1	nucl
MsMYB218	MSAD_313736.t1	317	35064.2	6.28	-0.851	AT5G08520.1	R1	nucl
MsMYB219	MSAD_313740.t1	396	44399.8	9.71	-0.779	AT5G08520.1	R1	nucl
MsMYB220	MSAD_314215.t1	345	39564.3	5.91	-0.29	AT4G01680.3	R1R2R3	plas
MsMYB221	MSAD_315321.t1	225	26748.8	5.35	-0.96	AT4G18770.1	R2R3	nucl
MsMYB222	MSAD_315326.t1	397	45364	5.8	-0.838	AT4G18770.1	R1R2R3	chlo
MsMYB223	MSAD_315336.t1	322	37058.5	9.91	-0.898	AT4G18770.1	R2R3	cyto
MsMYB224	MSAD_315465.t1	519	57274.1	8.64	-0.751	AT5G02320.2	R2R3	nucl
MsMYB225	MSAD_315751.t1	1653	179940	6.62	-0.65	AT3G52250.2	R1R2R3	nucl
MsMYB226	MSAD_316695.t1	1424	155631	6.45	-0.695	AT3G52250.2	R1	nucl
MsMYB227	MSAD_316696.t1	270	29056.7	5.31	-0.264	AT3G52250.2	R1	E.R
MsMYB228	MSAD_316745.t1	270	30645.6	7.71	-0.637	AT3G01140.2	R2R3	nucl
MsMYB229	MSAD_316746.t1	290	32480.7	8.67	-0.578	AT3G01140.2	R2R3	nucl
MsMYB230	MSAD_316849.t1	361	41111.7	6.05	-0.624	AT4G21440.1	R2R3	nucl
MsMYB231	MSAD_317030.t1	278	30169	5.77	-0.415	AT4G37260.1	R2R3	chlo
MsMYB232	MSAD_317146.t1	253	29368.5	5.44	-0.959	AT3G46130.1	R2R3	nucl
MsMYB233	MSAD_318299.t1	1126	125046	9.04	-0.549	AT5G58900.1	R1	nucl
MsMYB234	MSAD_319099.t1	345	39308.3	6.27	-0.75	AT3G01140.2	R2R3	nucl
MsMYB235	MSAD_319397.t1	282	30836.5	8.58	-0.601	AT5G08520.1	R2R3	nucl
MsMYB236	MSAD_319681.t1	249	29143.2	8.93	-0.96	AT5G49330.1	R2R3	nucl
MsMYB237	MSAD_320771.t1	367	41321.9	7.08	-0.55	AT5G17300.1	R1	nucl
MsMYB238	MSAD_320826.t1	156	18002.8	9.55	-0.89	AT1G66230.1	R2R3	nucl
MsMYB239	MSAD_320931.t1	326	37133.3	6.67	-0.812	AT2G36890.2	R2R3	nucl
MsMYB240	MSAD_321842.t1	166	19320.1	9.91	-0.998	AT4G32730.5	R1R2R3	nucl
MsMYB241	MSAD_322217.t1	313	35935.1	6.01	-0.776	AT3G12720.1	R2R3	nucl
MsMYB242	MSAD_322667.t1	362	39181.9	6.88	-0.539	AT5G08520.1	R2R3	nucl
MsMYB243	MSAD_322686.t1	342	36754.2	6.21	-0.446	AT5G08520.1	R1	nucl
MsMYB244	MSAD_322711.t1	293	32901.3	8.87	-0.591	AT5G02320.2	R2R3	nucl
MsMYB245	MSAD_323398.t1	103	11811.8	9.43	-0.32	AT3G01140.2	R2R3	nucl
MsMYB246	MSAD_323445.t1	318	35757.2	5.76	-0.672	AT3G28910.1	R2R3	nucl
MsMYB247	MSAD_323908.t1	296	33294.6	4.41	-0.709	AT1G79180.1	R2R3	nucl
MsMYB248	MSAD_324388.t1	284	32762.8	6.26	-0.856	AT4G18770.1	R1R2R3	nucl
MsMYB249	MSAD_325491.t1	290	31421	6.08	-0.656	AT5G08520.1	R2R3	nucl
MsMYB250	MSAD_326153.t1	224	25948.4	6.45	-0.738	AT1G66370.1	R2R3	nucl
MsMYB251	MSAD_326154.t1	308	35627.5	9.29	-0.766	AT1G66370.1	R2R3	nucl
MsMYB252	MSAD_326158.t1	239	27616.4	8.94	-0.757	AT1G66370.1	R2R3	nucl
MsMYB253	MSAD_326870.t1	301	32305.3	6.24	-0.436	AT5G08520.1	R1	nucl
MsMYB254	MSAD_327112.t1	345	38661.9	5.62	-0.679	AT3G28470.1	R2R3	nucl
MsMYB255	MSAD_327363.t1	272	31218	7.1	-0.723	AT2G38090.1	R2R3	nucl
MsMYB256	MSAD_327548.t1	297	34126.9	8.46	-0.29	AT1G69560.1	R2R3	plas
MsMYB257	MSAD_327549.t1	134	15674.1	9.57	-0.349	AT5G17800.1	R1	cyto
MsMYB258	MSAD_328143.t1	297	34536.1	8.57	-0.848	AT3G60460.1	R2R3	nucl
MsMYB259	MSAD_328445.t1	79	9250.53	11.37	-0.906	AT1G19000.2	R1	nucl
MsMYB260	MSAD_329033.t1	366	41987.1	6.18	-0.853	AT2G26960.1	R2R3	nucl
MsMYB261	MSAD_330011.t1	355	40554.3	4.78	-0.769	AT1G74650.1	R2R3	nucl
MsMYB262	MSAD_330547.t1	115	13814.7	9.93	-1.086	AT1G68320.1	R2R3	cyto
MsMYB263	MSAD_330785.t1	779	88863.8	5.42	-0.652	AT2G31180.1	R1R2R3	nucl
MsMYB264	MSAD_330802.t1	228	26707.7	6.83	-0.999	AT5G16770.4	R1R2R3	nucl
MsMYB265	MSAD_332735.t1	304	33503.1	9.02	-0.501	AT5G45420.3	R2R3	nucl
