# Supplementary material for: MYB transcription factors in alfalfa (Medicago sativa): genome-wide identification and expression analysis under abiotic stresses
Source: PeerJ. 2019 Sep 17;7:e7714. doi: 10.7717/peerj.7714 (PMC6753925; doi:10.7717/peerj.7714)
Supplement: Supplemental Information 11 [file peerj-07-7714-s011.xls]

## Sheet: Sheet1
Table S4. Summary information for alignment of the predicted MsMYB genes between a previous study and our research.
Gene name in previous study	Gene name in our study	Identities	Gaps	E value
MsMYB1	MsMYB239	0.932515	0	0
MsMYB2	MsMYB126	0.955621	0.035503	0
MsMYB3	MsMYB263	0.915441	0	8e-175
MsMYB4	MsMYB208	0.988539	0	0
MsMYB5	MsMYB025	0.983193	0.256329	3e-101
MsMYB6	MsMYB137	0.996078	0.270115	1e-99
MsMYB7	MsMYB074	0.996855	0	0
MsMYB8	MsMYB196	0.996324	0	0
MsMYB9	-	-	-	-
MsMYB10	MsMYB145	1	0	0
MsMYB11	MsMYB144	0.962825	0.0371747	0
MsMYB12	MsMYB202	0.989547	0.00348432	0
MsMYB13	MsMYB003	0.987692	0.0123077	0
MsMYB14	-	-	-	-
MsMYB15	MsMYB008	0.990909	0	0
MsMYB16	MsMYB193	0.991416	0	5e-176
MsMYB17	MsMYB177	0.992308	0	0
