# Supplementary material for: MYB transcription factors in alfalfa (Medicago sativa): genome-wide identification and expression analysis under abiotic stresses
Source: PeerJ. 2019 Sep 17;7:e7714. doi: 10.7717/peerj.7714 (PMC6753925; doi:10.7717/peerj.7714)
Supplement: Supplemental Information 12 [file peerj-07-7714-s012.xlsx]

## Sheet: Sheet1
Table S5. Functional annotation (gene ontology) of MsMYB proteins.
Gene name	Cellular component			Molecular function				Biological process
MsMYB001				GO:0003677
MsMYB002				GO:0003677
MsMYB003				GO:0003677
MsMYB004
MsMYB005				GO:0003677
MsMYB006	GO:0005575			GO:0003677
MsMYB007
MsMYB008				GO:0003677
MsMYB009				GO:0003677
MsMYB010				GO:0003677
MsMYB011				GO:0003677
MsMYB012				GO:0003677
MsMYB013
MsMYB014				GO:0003677
MsMYB015				GO:0003677
MsMYB016				GO:0003677
MsMYB017				GO:0003677
MsMYB018				GO:0003677
MsMYB019
MsMYB020
MsMYB021				GO:0003677
MsMYB022				GO:0003677
MsMYB023				GO:0003677
MsMYB024				GO:0003677
MsMYB025				GO:0003677
MsMYB026	GO:0005575			GO:0003677
MsMYB027				GO:0003677
MsMYB028				GO:0003677
MsMYB029				GO:0003677
MsMYB030				GO:0003677
MsMYB031				GO:0003677	GO:0003700			GO:0034641	GO:0009058	GO:0007049
MsMYB032				GO:0003677
MsMYB033				GO:0003677
MsMYB034				GO:0003677
MsMYB035	GO:0005634			GO:0003677	GO:0043167			GO:0051276	GO:0034641	GO:0009058
MsMYB036	GO:0005575			GO:0043167	GO:0016874			GO:0009056	GO:0006464
MsMYB037				GO:0003677
MsMYB038				GO:0003677
MsMYB039
MsMYB040	GO:0005634			GO:0003677				GO:0034641	GO:0009058
MsMYB041	GO:0005634			GO:0003677				GO:0034641	GO:0009058
MsMYB042				GO:0003677
MsMYB043	GO:0005634			GO:0003677	GO:0003700	GO:0016746		GO:0051276	GO:0006464	GO:0034641	GO:0009058
MsMYB044	GO:0005634			GO:0003677
MsMYB045
MsMYB046
MsMYB047
MsMYB048				GO:0003677
MsMYB049				GO:0003677
MsMYB050				GO:0003677				GO:0008150	GO:0044699
MsMYB051	GO:0005575			GO:0003677
MsMYB052				GO:0003677
MsMYB053	GO:0005635	GO:0032991	GO:0043234	GO:0005198				GO:0006913	GO:0006605
MsMYB054				GO:0003677
MsMYB055
MsMYB056				GO:0003677
MsMYB057				GO:0003677
MsMYB058				GO:0003677
MsMYB059				GO:0003677
MsMYB060				GO:0003677
MsMYB061				GO:0003677
MsMYB062	GO:0005634			GO:0003677				GO:0034641	GO:0009058
MsMYB063	GO:0005634			GO:0003677				GO:0034641	GO:0009058
MsMYB064	GO:0005634			GO:0003677				GO:0000902	GO:0030154	GO:0000003
MsMYB065	GO:0005634			GO:0003677				GO:0034641	GO:0009058
MsMYB066				GO:0003677
MsMYB067	GO:0005634			GO:0003677	GO:0003700	GO:0016746		GO:0051276	GO:0006464	GO:0034641	GO:0009058
MsMYB068	GO:0005634			GO:0003677				GO:0034641	GO:0009058
MsMYB069
MsMYB070	GO:0005634			GO:0003677				GO:0034641	GO:0009058
MsMYB071	GO:0005575			GO:0003677
MsMYB072				GO:0003677
MsMYB073				GO:0003677
MsMYB074				GO:0003677
MsMYB075				GO:0003677
MsMYB076	GO:0005634			GO:0003677				GO:0034641	GO:0009058
MsMYB077				GO:0003677	GO:0003700			GO:0034641	GO:0009058	GO:0007049
MsMYB078				GO:0003677
MsMYB079				GO:0003677
MsMYB080				GO:0003677
MsMYB081				GO:0003677	GO:0003700			GO:0034641	GO:0009058	GO:0007049
MsMYB082				GO:0003677
MsMYB083				GO:0003677
MsMYB084				GO:0003677
MsMYB085				GO:0003677
MsMYB086
MsMYB087				GO:0003677
MsMYB088				GO:0003677
MsMYB089				GO:0003677	GO:0016491
MsMYB090				GO:0003677
MsMYB091	GO:0005634			GO:0003677
MsMYB092				GO:0003677
MsMYB093				GO:0003677
MsMYB094				GO:0003677
MsMYB095				GO:0003677
MsMYB096
MsMYB097				GO:0003677
MsMYB098
MsMYB099				GO:0003677
MsMYB100				GO:0003677
MsMYB101				GO:0003677
MsMYB102				GO:0003677
MsMYB103	GO:0005634			GO:0003677				GO:0034641	GO:0009058
MsMYB104	GO:0005634			GO:0003677
MsMYB105	GO:0005634			GO:0003677				GO:0034641	GO:0009058
MsMYB106				GO:0003677
MsMYB107	GO:0005634			GO:0003677				GO:0034641	GO:0009058
MsMYB108	GO:0005634			GO:0003677				GO:0034641	GO:0009058
MsMYB109				GO:0003677
MsMYB110				GO:0003677
MsMYB111				GO:0003677
MsMYB112	GO:0005634			GO:0003677				GO:0034641	GO:0009058
MsMYB113				GO:0003677
MsMYB114				GO:0003677
MsMYB115				GO:0003677
MsMYB116				GO:0003677
MsMYB117				GO:0003677
MsMYB118	GO:0005634			GO:0003677				GO:0051276	GO:0034641	GO:0009058
MsMYB119				GO:0003677
MsMYB120				GO:0003677				GO:0071554	GO:0034641	GO:0009058
MsMYB121				GO:0003677
MsMYB122
MsMYB123				GO:0003677
MsMYB124	GO:0005634			GO:0003677				GO:0034641	GO:0009058
MsMYB125	GO:0005634			GO:0003677				GO:0034641	GO:0009058
MsMYB126				GO:0003677
MsMYB127	GO:0005634			GO:0003677
MsMYB128	GO:0005634			GO:0003677
MsMYB129
MsMYB130				GO:0003677
MsMYB131				GO:0003677
MsMYB132				GO:0003677
MsMYB133				GO:0003677
MsMYB134	GO:0005634			GO:0003677				GO:0034641	GO:0009058
MsMYB135				GO:0003677
MsMYB136				GO:0003677
MsMYB137				GO:0003677
MsMYB138				GO:0003677
MsMYB139				GO:0003677
MsMYB140				GO:0003677
MsMYB141				GO:0003677
MsMYB142				GO:0003677
MsMYB143				GO:0003677
MsMYB144				GO:0003677
MsMYB145	GO:0005575			GO:0003677
MsMYB146				GO:0003677
MsMYB147				GO:0003677
MsMYB148	GO:0005623			GO:0003677				GO:0008219	GO:0007165	GO:0048856	GO:0034641	GO:0009058
MsMYB149
MsMYB150				GO:0003677
MsMYB151				GO:0003677
MsMYB152				GO:0003677
MsMYB153				GO:0003677
MsMYB154	GO:0005634			GO:0003677
MsMYB155				GO:0003677
MsMYB156				GO:0003677
MsMYB157
MsMYB158	GO:0005634			GO:0003677				GO:0034641	GO:0009058
MsMYB159				GO:0003677				GO:0008150
MsMYB160				GO:0003677
MsMYB161				GO:0003677
MsMYB162	GO:0005634			GO:0003677
MsMYB163	GO:0005634			GO:0003677	GO:0003700	GO:0016746		GO:0051276	GO:0006464	GO:0034641	GO:0009058
MsMYB164				GO:0003677
MsMYB165				GO:0003677
MsMYB166				GO:0003677
MsMYB167				GO:0003677
MsMYB168				GO:0003677
MsMYB169				GO:0003677
MsMYB170
MsMYB171				GO:0003677
MsMYB172	GO:0005634			GO:0003677				GO:0034641	GO:0009058
MsMYB173	GO:0005634			GO:0003677				GO:0034641	GO:0009058
MsMYB174	GO:0005634			GO:0003677				GO:0034641	GO:0009058
MsMYB175	GO:0005634			GO:0003677
MsMYB176	GO:0005634			GO:0003677				GO:0034641	GO:0009058
MsMYB177				GO:0003677
MsMYB178				GO:0003677
MsMYB179
MsMYB180	GO:0005634			GO:0003677	GO:0003700	GO:0016746		GO:0051276	GO:0006464	GO:0034641	GO:0009058
MsMYB181	GO:0005634			GO:0003677
MsMYB182				GO:0003677
MsMYB183				GO:0003677
MsMYB184				GO:0003677
MsMYB185				GO:0003677
MsMYB186				GO:0003677
MsMYB187				GO:0003677
MsMYB188	GO:0005634			GO:0003677
MsMYB189
MsMYB190	GO:0005634			GO:0003677	GO:0003700	GO:0001071		GO:0007165	GO:0048856	GO:0009058	GO:0040007	GO:0000003	GO:0008219	GO:0030154	GO:0034641
MsMYB191				GO:0003677
MsMYB192
MsMYB193				GO:0003677
MsMYB194				GO:0003677
MsMYB195	GO:0005634			GO:0003677				GO:0034641	GO:0009058
MsMYB196				GO:0003677
MsMYB197	GO:0005634			GO:0003677
MsMYB198				GO:0003677
MsMYB199				GO:0003677
MsMYB200				GO:0003677
MsMYB201	GO:0005694	GO:0005730		GO:0003677				GO:0051301	GO:0048646	GO:0034641	GO:0009058	GO:0006950	GO:0002376
MsMYB202				GO:0003677
MsMYB203				GO:0003677
MsMYB204	GO:0005634			GO:0003677	GO:0043167			GO:0034641	GO:0009058
MsMYB205				GO:0003677
MsMYB206	GO:0005634			GO:0003677	GO:0003700	GO:0016746	GO:0043167	GO:0051276	GO:0006464	GO:0034641	GO:0009058
MsMYB207	GO:0005634			GO:0003677				GO:0034641	GO:0009058
MsMYB208				GO:0003677
MsMYB209				GO:0003677
MsMYB210				GO:0003677
MsMYB211				GO:0003677
MsMYB212				GO:0003677
MsMYB213	GO:0005634			GO:0003677	GO:0003700	GO:0016746		GO:0051276	GO:0006464	GO:0034641	GO:0009058
MsMYB214				GO:0003677
MsMYB215	GO:0005634			GO:0003677				GO:0034641	GO:0009058
MsMYB216
MsMYB217	GO:0005634			GO:0003677				GO:0034641	GO:0009058
MsMYB218
MsMYB219
MsMYB220				GO:0003677
MsMYB221				GO:0003677
MsMYB222				GO:0003677
MsMYB223				GO:0003677
MsMYB224				GO:0003677
MsMYB225	GO:0005634			GO:0003677
MsMYB226	GO:0005634			GO:0003677
MsMYB227	GO:0005634			GO:0003677
MsMYB228				GO:0003677
MsMYB229				GO:0003677
MsMYB230				GO:0003677	GO:0008168
MsMYB231				GO:0003677
MsMYB232	GO:0005575			GO:0003677
MsMYB233	GO:0005634			GO:0003677
MsMYB234				GO:0003677
MsMYB235	GO:0005634			GO:0003677				GO:0034641	GO:0009058
MsMYB236				GO:0003677
MsMYB237	GO:0005634			GO:0003677				GO:0034641	GO:0009058
MsMYB238				GO:0003677
MsMYB239				GO:0003677
MsMYB240				GO:0003677
MsMYB241				GO:0003677
MsMYB242
MsMYB243
MsMYB244
MsMYB245				GO:0003677
MsMYB246				GO:0003677
MsMYB247				GO:0003677
MsMYB248				GO:0003677
MsMYB249	GO:0005634			GO:0003677				GO:0034641	GO:0009058
MsMYB250				GO:0003677
MsMYB251				GO:0003677
MsMYB252				GO:0003677
MsMYB253	GO:0005634			GO:0003677				GO:0034641	GO:0009058
MsMYB254	GO:0005634			GO:0003677				GO:0048856	GO:0000003
MsMYB255	GO:0005634			GO:0003677				GO:0034641	GO:0009058
MsMYB256				GO:0003677
MsMYB257				GO:0003677
MsMYB258
MsMYB259	GO:0005634			GO:0003677	GO:0003700	GO:0016746		GO:0051276	GO:0006464	GO:0034641	GO:0009058
MsMYB260				GO:0003677
MsMYB261				GO:0003677
MsMYB262				GO:0003677				GO:0008150
MsMYB263				GO:0003677
MsMYB264				GO:0003677
MsMYB265	GO:0005783	GO:0005886		GO:0003677				GO:0048856	GO:0030154	GO:0021700	GO:0040007
