# Supplementary material for: MYB transcription factors in alfalfa (Medicago sativa): genome-wide identification and expression analysis under abiotic stresses
Source: PeerJ. 2019 Sep 17;7:e7714. doi: 10.7717/peerj.7714 (PMC6753925; doi:10.7717/peerj.7714)
Supplement: Supplemental Information 13 [file peerj-07-7714-s013.xlsx]

## Sheet: Sheet1
Table S6. Gene ontology annotations for 45 MYB genes from Arabidopsis thaliana, Lotus japonicas and Medicago truncatula.
Number	Gene names	GO annotation
1	AT1G63910.1	regulation of transcription from RNA polymerase II promoter; cell differentiation; positive regulation of transcription, DNA-templated; positive regulation of syringal lignin biosynthetic process; regulation of secondary cell wall biogenesis; RNA polymerase II transcription factor activity, sequence-specific DNA binding; transcription factor activity, RNA polymerase II transcription factor recrui…
2	AT1G66370.1	regulation of transcription from RNA polymerase II promoter; multicellular organism development; response to jasmonic acid; cell differentiation; regulation of anthocyanin biosynthetic process; RNA polymerase II transcription factor activity, sequence-specific DNA binding; transcription factor activity, RNA polymerase II transcription factor recruiting; sequence-specific DNA binding; transcriptio…
3	AT1G69560.1	regulation of transcription from RNA polymerase II promoter; organ boundary specification between lateral organs and the meristem; cell differentiation; RNA polymerase II transcription factor activity, sequence-specific DNA binding; transcription factor activity, RNA polymerase II transcription factor recruiting; sequence-specific DNA binding; transcription regulatory region DNA binding
4	AT2G02820.2	regulation of transcription from RNA polymerase II promoter; embryo sac development; guard cell differentiation; RNA polymerase II transcription factor activity, sequence-specific DNA binding; transcription factor activity, RNA polymerase II transcription factor recruiting; sequence-specific DNA binding; transcription regulatory region DNA binding
5	AT2G26960.1	regulation of transcription from RNA polymerase II promoter; cell differentiation; RNA polymerase II transcription factor activity, sequence-specific DNA binding; transcription factor activity, RNA polymerase II transcription factor recruiting; sequence-specific DNA binding; transcription regulatory region DNA binding
6	AT2G31180.1	regulation of transcription from RNA polymerase II promoter; response to salt stress; response to ethylene; response to auxin; response to salicylic acid; response to jasmonic acid; cell differentiation; RNA polymerase II transcription factor activity, sequence-specific DNA binding; transcription factor activity, RNA polymerase II transcription factor recruiting; sequence-specific DNA binding; tr…
7	AT2G37630.1	regulation of transcription from RNA polymerase II promoter; asymmetric cell division; response to virus; response to salt stress; response to auxin; response to gibberellin; response to salicylic acid; response to jasmonic acid; flower development; polarity specification of adaxial/abaxial axis; leaf formation; cell differentiation; defense response to bacterium; regulation of innate immune resp…
8	AT2G38090.1	regulation of transcription, DNA-templated; DNA binding; transcription factor activity, sequence-specific DNA binding
9	AT3G18100.1	regulation of transcription from RNA polymerase II promoter; cell differentiation; snRNA transcription from RNA polymerase II promoter; snRNA transcription from RNA polymerase III promoter; RNA polymerase II transcription factor activity, sequence-specific DNA binding; transcription factor activity, RNA polymerase II transcription factor recruiting; sequence-specific DNA binding; transcription re…
10	AT3G49690.1	regulation of transcription from RNA polymerase II promoter; multicellular organism development; response to salicylic acid; cell differentiation; RNA polymerase II transcription factor activity, sequence-specific DNA binding; transcription factor activity, RNA polymerase II transcription factor recruiting; sequence-specific DNA binding; transcription regulatory region DNA binding
11	AT3G53200.1	regulation of transcription from RNA polymerase II promoter; response to chitin; cell differentiation; RNA polymerase II transcription factor activity, sequence-specific DNA binding; transcription factor activity, RNA polymerase II transcription factor recruiting; sequence-specific DNA binding; transcription regulatory region DNA binding
12	AT4G18770.1	regulation of transcription from RNA polymerase II promoter; pollen tube guidance; regulation of synergid differentiation; RNA polymerase II transcription factor activity, sequence-specific DNA binding; transcription factor activity, RNA polymerase II transcription factor recruiting; sequence-specific DNA binding; transcription regulatory region DNA binding
13	AT5G04760.1	regulation of transcription, DNA-templated; DNA binding; transcription factor activity, sequence-specific DNA binding
14	AT5G16770.1	regulation of transcription from RNA polymerase II promoter; response to abscisic acid; cell differentiation; RNA polymerase II transcription factor activity, sequence-specific DNA binding; transcription factor activity, RNA polymerase II transcription factor recruiting; sequence-specific DNA binding; transcription regulatory region DNA binding
15	AT5G49330.1	regulation of transcription from RNA polymerase II promoter; cell differentiation; positive regulation of transcription, DNA-templated; flavonol biosynthetic process; RNA polymerase II transcription factor activity, sequence-specific DNA binding; transcription factor activity, RNA polymerase II transcription factor recruiting; sequence-specific DNA binding; transcription regulatory region DNA bin…
16	Lj0g3v0212129.2	DNA binding
17	Lj0g3v0221649.1	DNA binding
18	Lj0g3v0246909.1	organ boundary specification between lateral organs and the meristem; DNA binding
19	Lj0g3v0260369.2	DNA binding
20	Lj1g3v1255850.1	DNA binding
21	Lj1g3v2979260.1	response to jasmonic acid; regulation of anthocyanin biosynthetic process; DNA binding
22	Lj2g3v0949390.1	DNA binding
23	Lj2g3v1326410.1	embryo sac development; guard cell differentiation; DNA binding
24	Lj2g3v1983980.1	response to salicylic acid; DNA binding
25	Lj3g3v1631860.1	asymmetric cell division; response to virus; response to salt stress; response to auxin; response to gibberellin; response to salicylic acid; response to jasmonic acid; polarity specification of adaxial/abaxial axis; leaf formation; defense response to bacterium; regulation of innate immune response; negative regulation of transcription, DNA-templated; response to cadmium ion; defense response to…
26	Lj3g3v2886960.1	DNA binding
27	Lj3g3v3639490.1	response to abscisic acid; DNA binding
28	Lj4g3v0216670.1	DNA binding
29	Lj4g3v2282940.1	flavonol biosynthetic process; DNA binding
30	Lj4g3v2989050.1	DNA binding
31	Medtr0008s0470	DNA-bing
32	Medtr1g062940.1	response to chitin; DNA binding
33	Medtr1g085880.1	DNA binding
34	Medtr1g111830.1	regulation of transcription, DNA-templated; DNA binding
35	Medtr2g034790.1	flavonol biosynthetic process; DNA binding
36	Medtr4g478180.1	response to abscisic acid; DNA binding
37	Medtr5g010020.1	positive regulation of transcription, DNA-templated; positive regulation of syringal lignin biosynthetic process; regulation of secondary cell wall biogenesis; DNA binding
38	Medtr5g014990.1	response to gibberellin; response to salicylic acid; DNA binding
39	Medtr5g038910.1	regulation of transcription, DNA-templated; embryo sac development; guard cell differentiation; DNA binding
40	Medtr5g041570.1	organ boundary specification between lateral organs and the meristem; DNA binding
41	Medtr5g069710.1	regulation of transcription, DNA-templated; DNA binding
42	Medtr5g078950.1	DNA binding
43	Medtr6g080360.1	DNA binding
44	Medtr7g061550.1	asymmetric cell division; response to virus; response to salt stress; response to auxin; response to gibberellin; response to salicylic acid; response to jasmonic acid; polarity specification of adaxial/abaxial axis; leaf formation; defense response to bacterium; regulation of innate immune response; negative regulation of transcription, DNA-templated; response to cadmium ion; defense response to…
45	Medtr7g451170.1	DNA binding
