# Supplementary material for: MYB transcription factors in alfalfa (Medicago sativa): genome-wide identification and expression analysis under abiotic stresses
Source: PeerJ. 2019 Sep 17;7:e7714. doi: 10.7717/peerj.7714 (PMC6753925; doi:10.7717/peerj.7714)
Supplement: Supplemental Information 14 [file peerj-07-7714-s014.xlsx]

## Sheet: Sheet1
Table S7. MEME motif sequences in predicted MsMYB proteins.
Motif	E-value	Width	Top scoring sequences
1	1.5e-3062	21	RCGKSCRLRWINYLRPDJKRG
2	3.0e-1360	14	SLIAARLPGRTDNE
3	4.6e-1762	18	KKGPWTPEEDEKLLAYIE
4	7.2e-1666	21	NFTEEEEDJIIELHAJLGNRW
5	1.4e-1036	11	IKNYWNTHLKK
6	3.7e-1002	14	GEGNWRSVPKNAGL
7	5.6e-545	20	TKTPTQVASHAQKYFJRQNS
8	3.7e-447	11	MGRAPCCDKQG
9	4.2e-313	20	KLIQMGIDPVTHKPLSENNN
10	7.6e-249	15	YGPRRWSKIAKKLPG
11	2.9e-217	36	KTVEEVKRHYEELVEDVSNIESGLVPLPNYSTTSSS
12	4.4e-151	21	KRKRRSSIHDITLVKNDTPVT
13	1.3e-127	50	TVVPSYINPFPMIPTPSYKAAHTNGSQREFISAQNPMIFAPNNNKMEVMH
14	5.6e-113	21	STEWTPEZNKLFENALAVYDK
15	3.2e-106	29	VPAYAFPPGSGPYPNGENPKPVSPVAAGQ
16	5.0e-105	29	VDVPVLVVGTKSWPALSDAQTPKPMNHVE
17	4.7e-098	29	MIANNDPAKETLTLFPVVPTYYGGEASSS
18	1.3e-126	41	EQQQEKTGTDIIESGHAVAILNSNDNNLVQAESGAEGSNEA
19	5.9e-094	29	RQMQLVLLCPIGSTLPDMNKLEKMRNLFN
20	6.3e-091	29	NRGNSSKGTLLLKYIMEVTNAKEVEKEMM
21	2.7e-086	32	MPMETIDLTNFLDSPPSIPISSSNAPMIHNFD
22	5.9e-122	50	MMNIGNHPNYESSESDFSSEGLATPEEEIGGYVPMMFNGDDGMASGYGTT
23	2.2e-079	21	ALRHMAQWESARLEAEARLSR
24	6.5e-070	21	MKAHEVIKPRPRTFSTHSPWL
25	2.4e-069	50	TFIVZGFAEKKRFERFKERVIALKFKALQHLWKEDTRLLSTRKHRPKSHK
26	8.3e-066	32	VPCAMWSDSLWNLGEQVGSEKIGSCSSLQEEN
27	4.3e-079	50	GRLNTSKGIWDLSTKNLFQYGETSQPRVSPSLSPSLVYDAHPSVSVKPEL
28	5.7e-070	28	VSNMLYNNVGSTSTSNHTTPTLIDREGT
29	4.0e-063	41	AVDQEDEIPSVELQSVIPPQGMQQTQTQQNEISPMLCLLPI
30	3.4e-069	41	DFAKIAQCVGTRSQFQCRAFFSKTRKCIGMDLEGPRAGIVG
31	4.1e-060	50	FPFPAGNKLRLVPTSEIINYTSKLLSESKADJQRNTLKMPALILDZKEKM
32	3.6e-086	50	AASSSITSSADPVKGKRVRKSVKARSICKQPLMPVITQDIDQETCSDESC
33	4.0e-071	50	HGTGNWKEVSKNTGLAHCGKSCRFRWYNTLRPBVKKGPFSKEEEEKIFEL
34	5.3e-060	40	GDKSDLHGVKFKKDFFGGKYPTILNEINGNNFEERSNPFH
35	3.6e-058	21	AEFFDDRTDVQCLHRWQKVLN
36	9.6e-057	50	RHMVSWSQTEHDLFVMGMIRYGQGRWSKIAENYVCNKTPQQVQSYATSFF
37	1.3e-056	50	ADGGRSDADBACIPETGSVNDSDTSGNKTGVDQPSSDKNTYHDESNPLEA
38	1.5e-056	29	YTMLGDYPQIPPPMETQYHMSESNPPHKS
39	2.0e-065	41	HSSNESFVFDBDDLSFMDAYMESVSENFWTZPYMIDTSYVP
40	8.1e-050	15	APMEQHENPPQDTAT
41	6.2e-047	21	GQWERRLQTDIHMAKQALSEA
42	6.8e-045	40	LESMLYTPKISEGSDASHTHSSEINLVDEKGKRPISLEND
43	1.3e-043	21	RLKKGQWTEEEDEILKAYVEK
44	1.0e-041	38	VYDVPWIGQPIGGPVVSAFGAPGFPSAPGHMAYGIGPV
45	1.8e-053	50	PGPARSKFVEPLPLINAVSRRDVGGYGNLFEDLDEIQSTSVKCFIPCTRK
