# Supplementary material for: MYB transcription factors in alfalfa (Medicago sativa): genome-wide identification and expression analysis under abiotic stresses
Source: PeerJ. 2019 Sep 17;7:e7714. doi: 10.7717/peerj.7714 (PMC6753925; doi:10.7717/peerj.7714)
Supplement: Supplemental Information 15 — The expression levels of these interaction genes with the absolute value of fold change ≥ 2. The “At gene 2” and “Ms gene 2” are interaction genes of the “At gene 1” and “Ms gene 1,” respectively. The “At gene 1,” “Ms gene 2,” “Mt gene1,” and “Mt gene2” are homologous genes of the “Ms gene 1,” “At gene 2,” “Ms gene 1,” and “Ms gene 2,” respectively. [file peerj-07-7714-s015.xlsx]

## Sheet: Sheet1
Table S8. Summary information for the 170 protein-protein interactions.
Gene name (Ms gene 1)	Ms gene 1	Mt gene 1	At gene 1	At gene 2	BIND/PubMed record	Ms gene 2	Mt gene 2	Annotation
MsMYB035	MSAD_232883.t1	Medtr6g092540.1	At5g56840	At1g10210	PubMedID:19095804	MSAD_330884.t1	Medtr3g112210.1	Mitogen-activated protein kinase
MsMYB035	MSAD_232883.t1	Medtr6g092540.1	At5g56840	At2g43790	PubMedID:19095804	MSAD_320162.t1	Medtr4g087620.2	Mitogen-activated protein kinase
MsMYB035	MSAD_232883.t1	Medtr6g092540.1	At5g56840	At3g45640	PubMedID:19095804	MSAD_308489.t1	Medtr4g061130.1	Mitogen-activated protein kinase
MsMYB035	MSAD_232883.t1	Medtr6g092540.1	At5g56840	At4g01370	PubMedID:19095804	MSAD_263875.t1	Medtr7g078690.1	Mitogen-activated protein kinase
MsMYB040	MSAD_233710.t1	Medtr6g477860.1	At1g18330	At2g43790	PubMedID:19095804	MSAD_320162.t1	Medtr4g087620.2	Mitogen-activated protein kinase
MsMYB040	MSAD_233710.t1	Medtr6g477860.1	At1g18330	At3g45640	PubMedID:19095804	MSAD_308489.t1	Medtr4g061130.1	Mitogen-activated protein kinase
MsMYB041	MSAD_234746.t1	Medtr1g111830.1	At5g04760	At1g60670	AI-1 MAIN&nbspdoi:10.1126/science.1203877	MSAD_220095.t1	Medtr4g074120.6	DUF3755 family protein
MsMYB043	MSAD_235749.t1	Medtr4g107230.1	At1g74840	At1g15750	AI-1 MAIN&nbspdoi:10.1126/science.1203877	MSAD_240341.t1	Medtr4g009840.1	Topless
MsMYB043	MSAD_235749.t1	Medtr4g107230.1	At1g74840	At3g59790	PubMedID:19095804	MSAD_320162.t1	Medtr4g087620.2	Mitogen-activated protein kinase
MsMYB045	MSAD_237419.t1	Medtr8g042410.1	At5g06100	At1g01620	MindID:2745	MSAD_237277.t1	Medtr4g415300.1	Major intrinsic protein (MIP) family transporter
MsMYB045	MSAD_237419.t1	Medtr8g042410.1	At5g06100	At1g05200	MindID:1469	MSAD_286622.t1	Medtr2g088450.12	Glutamate receptor
MsMYB045	MSAD_237419.t1	Medtr8g042410.1	At5g06100	At1g06890	MindID:3918	MSAD_280728.t1	Medtr3g094260.1	Nucleotide/sugar transporter family protein
MsMYB045	MSAD_237419.t1	Medtr8g042410.1	At5g06100	At1g08770	MindID:4893	MSAD_288558.t1	Medtr7g096220.1	PRA1 family protein
MsMYB045	MSAD_237419.t1	Medtr8g042410.1	At5g06100	At1g09380	MindID:2677	MSAD_223480.t1	Medtr7g111830.1	WAT1-related protein
MsMYB045	MSAD_237419.t1	Medtr8g042410.1	At5g06100	At1g11450	MindID:2037	MSAD_249490.t1	Medtr2g016710.1	WAT1-related protein
MsMYB045	MSAD_237419.t1	Medtr8g042410.1	At5g06100	At1g12110	MindID:11565	MSAD_306833.t1	Medtr4g101380.1	Peptide/nitrate transporter
MsMYB045	MSAD_237419.t1	Medtr8g042410.1	At5g06100	At1g15150	MindID:1977	MSAD_309237.t1	Medtr1g108840.1	Protein DETOXIFICATION
MsMYB045	MSAD_237419.t1	Medtr8g042410.1	At5g06100	At1g15500	MindID:1427	MSAD_321477.t1	Medtr4g011460.1	ADP ATP carrier protein
MsMYB045	MSAD_237419.t1	Medtr8g042410.1	At5g06100	At1g16560	MindID:7394	MSAD_259338.t1	Medtr6g465410.1	Post-GPI attachment to proteins factor 3
MsMYB045	MSAD_237419.t1	Medtr8g042410.1	At5g06100	At1g19800	MindID:1216	MSAD_274062.t1	Medtr3g005100.1	ABC transporter
MsMYB045	MSAD_237419.t1	Medtr8g042410.1	At5g06100	At1g21210	MindID:2388	MSAD_225067.t1	Medtr1g027570.1	Wall-associated receptor kinase-like protein
MsMYB045	MSAD_237419.t1	Medtr8g042410.1	At5g06100	At1g25320	doi:10.1126/science.1251358	MSAD_309274.t1	Medtr1g109580.1	LRR receptor-like kinase
MsMYB045	MSAD_237419.t1	Medtr8g042410.1	At5g06100	At1g31130	MindID:5745	MSAD_301590.t1	Medtr4g096890.1	Transmembrane protein putative
MsMYB045	MSAD_237419.t1	Medtr8g042410.1	At5g06100	At1g33100	MindID:1264	MSAD_254419.t1	Medtr7g087400.1	Protein DETOXIFICATION
MsMYB045	MSAD_237419.t1	Medtr8g042410.1	At5g06100	At1g34470	MindID:5571	MSAD_212066.t1	Medtr2g006070.1	Probable magnesium transporter
MsMYB045	MSAD_237419.t1	Medtr8g042410.1	At5g06100	At1g47670	MindID:4768	MSAD_220956.t1	Medtr2g012470.1	Transmembrane amino acid transporter family protein
MsMYB045	MSAD_237419.t1	Medtr8g042410.1	At5g06100	At1g49230	MindID:1348	MSAD_303222.t1	Medtr3g095560.1	RING-H2 zinc finger protein
MsMYB045	MSAD_237419.t1	Medtr8g042410.1	At5g06100	At1g53270	MindID:2509	MSAD_269138.t1	Medtr2g078080.1	White-brown-complex ABC transporter family protein
MsMYB045	MSAD_237419.t1	Medtr8g042410.1	At5g06100	At1g54730	MindID:1068	MSAD_223636.t1	Medtr7g113960.1	General substrate transporter Sugar transporter superfamily
MsMYB045	MSAD_237419.t1	Medtr8g042410.1	At5g06100	At1g64150	MindID:7070	MSAD_315170.t1	Medtr5g009810.1	GDT1-like protein
MsMYB045	MSAD_237419.t1	Medtr8g042410.1	At5g06100	At1g67510	MindID:11595	MSAD_311541.t1	Medtr7g070200.1	Receptor-like kinase
MsMYB045	MSAD_237419.t1	Medtr8g042410.1	At5g06100	At1g67720	MindID:1579	MSAD_236795.t1	Medtr3g086120.1	LRR receptor-like kinase
MsMYB045	MSAD_237419.t1	Medtr8g042410.1	At5g06100	At1g68380	MindID:11525	MSAD_234633.t1	Medtr1g110290.1	Core-2/I-branching enzyme
MsMYB045	MSAD_237419.t1	Medtr8g042410.1	At5g06100	At1g69330	MindID:1086	MSAD_302592.t1	Medtr5g043680.1	Zinc finger C3HC4 type (RING finger) protein
MsMYB045	MSAD_237419.t1	Medtr8g042410.1	At5g06100	At1g70520	MindID:6041	MSAD_217714.t1	Medtr5g033690.1	Cysteine-rich receptor-like kinase
MsMYB045	MSAD_237419.t1	Medtr8g042410.1	At5g06100	At1g71940	MindID:753	MSAD_303603.t1	Medtr1g096450.1	SNARE associated family protein
MsMYB045	MSAD_237419.t1	Medtr8g042410.1	At5g06100	At1g76430	MindID:1368	MSAD_307413.t1	Medtr4g083960.1	General substrate transporter
MsMYB045	MSAD_237419.t1	Medtr8g042410.1	At5g06100	At1g78490	MindID:1927	MSAD_310622.t1	Medtr5g010750.1	Cytochrome P450 family protein
MsMYB045	MSAD_237419.t1	Medtr8g042410.1	At5g06100	At1g80300	MindID:5589	MSAD_225780.t1	Medtr4g011460.1	ADP ATP carrier protein
MsMYB045	MSAD_237419.t1	Medtr8g042410.1	At5g06100	At2g01420	MindID:11485	MSAD_249005.t1	Medtr4g084870.1	Auxin efflux carrier component
MsMYB045	MSAD_237419.t1	Medtr8g042410.1	At5g06100	At2g04040	MindID:3120	MSAD_299206.t1	Medtr7g082810.1	Protein DETOXIFICATION
MsMYB045	MSAD_237419.t1	Medtr8g042410.1	At5g06100	At2g12400	MindID:6854	MSAD_237154.t1	Medtr2g450550.1	Transmembrane protein putative
MsMYB045	MSAD_237419.t1	Medtr8g042410.1	At5g06100	At2g26900	MindID:1500	MSAD_250523.t1	Medtr4g113090.1	Bile acid:sodium symporter
MsMYB045	MSAD_237419.t1	Medtr8g042410.1	At5g06100	At2g29020	MindID:5184	MSAD_242667.t1	Medtr2g097270.1	Rab5-interacting family protein
MsMYB045	MSAD_237419.t1	Medtr8g042410.1	At5g06100	At2g29650	MindID:956	MSAD_245164.t1	Medtr3g463080.1	Sodium-dependent phosphate transporter putative
MsMYB045	MSAD_237419.t1	Medtr8g042410.1	At5g06100	At2g31360	MindID:5202	MSAD_244919.t1	Medtr4g010150.1	Fatty-acid desaturase
MsMYB045	MSAD_237419.t1	Medtr8g042410.1	At5g06100	At2g34250	MindID:1680	MSAD_272494.t1	Medtr8g076770.1	Protein transporter Sec61 subunit alpha-like protein
MsMYB045	MSAD_237419.t1	Medtr8g042410.1	At5g06100	At2g35520	MindID:3219	MSAD_273189.t1	Medtr3g023120.1	Dolichyl-diphosphooligosaccharide--protein glycosyltransferase subunit DAD1
MsMYB045	MSAD_237419.t1	Medtr8g042410.1	At5g06100	At2g37360	MindID:1118	MSAD_256603.t1	Medtr7g100120.1	White-brown-complex ABC transporter family protein
MsMYB045	MSAD_237419.t1	Medtr8g042410.1	At5g06100	At2g38330	MindID:1347	MSAD_291169.t1	Medtr5g099020.2	Protein DETOXIFICATION
MsMYB045	MSAD_237419.t1	Medtr8g042410.1	At5g06100	At2g38510	MindID:1778	MSAD_294583.t1	Medtr4g027920.1	Protein DETOXIFICATION
MsMYB045	MSAD_237419.t1	Medtr8g042410.1	At5g06100	At2g39510	MindID:2821	MSAD_256627.t1	Medtr7g100050.1	WAT1-related protein
MsMYB045	MSAD_237419.t1	Medtr8g042410.1	At5g06100	At2g42390	MindID:4896	MSAD_245928.t1	Medtr4g079430.2	Glucosidase II beta subunit-like protein
MsMYB045	MSAD_237419.t1	Medtr8g042410.1	At5g06100	At2g45200	MindID:1090	MSAD_316769.t1	Medtr4g025850.1	Golgi SNAP receptor complex member 1
MsMYB045	MSAD_237419.t1	Medtr8g042410.1	At5g06100	At2g45560	MindID:5214	MSAD_278960.t1	Medtr7g075610.1	Cytochrome P450 family monooxygenase
MsMYB045	MSAD_237419.t1	Medtr8g042410.1	At5g06100	At3g01550	MindID:3194	MSAD_305678.t1	Medtr6g005480.1	Plastid phosphate translocator
MsMYB045	MSAD_237419.t1	Medtr8g042410.1	At5g06100	At3g03050	MindID:549	MSAD_248746.t1	Medtr4g077910.1	Cellulose synthase-like protein
MsMYB045	MSAD_237419.t1	Medtr8g042410.1	At5g06100	At3g05150	MindID:4215	MSAD_260155.t1	Medtr4g118610.1	Sugar porter (SP) family MFS transporter
MsMYB045	MSAD_237419.t1	Medtr8g042410.1	At5g06100	At3g06170	MindID:1649	MSAD_282838.t1	Medtr2g022060.1	TMS membrane protein/tumor differentially protein
MsMYB045	MSAD_237419.t1	Medtr8g042410.1	At5g06100	At3g14770	MindID:748	MSAD_245804.t1	Medtr8g042490.1	Sodium bile acid symporter family protein
MsMYB045	MSAD_237419.t1	Medtr8g042410.1	At5g06100	At3g15710	MindID:2653	MSAD_322493.t1	Medtr2g103570.1	Signal peptidase I
MsMYB045	MSAD_237419.t1	Medtr8g042410.1	At5g06100	At3g16180	MindID:2442	MSAD_310700.t1	Medtr2g101640.1	Peptide/nitrate transporter plant
MsMYB045	MSAD_237419.t1	Medtr8g042410.1	At5g06100	At3g16510	MindID:932	MSAD_252464.t1	Medtr4g119780.1	C2 domain protein
MsMYB045	MSAD_237419.t1	Medtr8g042410.1	At5g06100	At3g17840	MindID:8090	MSAD_264808.t1	Medtr8g107470.1	LRR receptor-like kinase
MsMYB045	MSAD_237419.t1	Medtr8g042410.1	At5g06100	At3g18215	MindID:1371	MSAD_261036.t1	Medtr8g106520.1	Transmembrane protein putative
MsMYB045	MSAD_237419.t1	Medtr8g042410.1	At5g06100	At3g19100	MindID:942	MSAD_235025.t1	Medtr4g086660.1	Calmodulin-domain kinase CDPK protein
MsMYB045	MSAD_237419.t1	Medtr8g042410.1	At5g06100	At3g19460	MindID:6149	MSAD_270178.t1	Medtr1g107445.1	Reticulon-like protein
MsMYB045	MSAD_237419.t1	Medtr8g042410.1	At5g06100	At3g22840	MindID:1695	MSAD_212939.t1	Medtr1g102800.1	Early light inducible protein
MsMYB045	MSAD_237419.t1	Medtr8g042410.1	At5g06100	At3g42640	MindID:1254	MSAD_323498.t1	Medtr4g116950.1	Plasma membrane ATPase
MsMYB045	MSAD_237419.t1	Medtr8g042410.1	At5g06100	At3g46280	MindID:1502	MSAD_236691.t1	Medtr6g071455.2	Carbohydrate-binding protein of the ER protein
MsMYB045	MSAD_237419.t1	Medtr8g042410.1	At5g06100	At3g47780	MindID:579	MSAD_324756.t1	Medtr3g437870.1	ABC transporter A family protein
MsMYB045	MSAD_237419.t1	Medtr8g042410.1	At5g06100	At3g49670	MindID:12275	MSAD_238837.t1	Medtr5g014700.1	Non-specific serine/threonine protein kinase
MsMYB045	MSAD_237419.t1	Medtr8g042410.1	At5g06100	At3g49750	MindID:2183	MSAD_277954.t1	Medtr5g015050.1	Leucine-rich receptor-like kinase family protein
MsMYB045	MSAD_237419.t1	Medtr8g042410.1	At5g06100	At3g53190	MindID:11542	MSAD_262420.t1	Medtr7g102940.1	Pectate lyase
MsMYB045	MSAD_237419.t1	Medtr8g042410.1	At5g06100	At3g54020	MindID:815	MSAD_304533.t1	Medtr4g020040.1	DUF3527 domain protein
MsMYB045	MSAD_237419.t1	Medtr8g042410.1	At5g06100	At3g59730	MindID:590	MSAD_328414.t1	Medtr7g062940.1	L-type lectin-domain receptor kinase IV.2-like protein
MsMYB045	MSAD_237419.t1	Medtr8g042410.1	At5g06100	At3g60220	MindID:3979	MSAD_292056.t1	Medtr8g009190.1	RING-H2 finger protein
MsMYB045	MSAD_237419.t1	Medtr8g042410.1	At5g06100	At3g60620	MindID:740	MSAD_262936.t1	Medtr3g466380.1	Phosphatidate cytidylyltransferase family protein
MsMYB045	MSAD_237419.t1	Medtr8g042410.1	At5g06100	At4g04510	MindID:10361	MSAD_308287.t1	Medtr1g021632.1	Cysteine-rich receptor-kinase-like protein
MsMYB045	MSAD_237419.t1	Medtr8g042410.1	At5g06100	At4g04570	MindID:11586doi:10.1126/science.1251358	MSAD_279599.t1	Medtr1g021632.1	Cysteine-rich receptor-kinase-like protein
MsMYB045	MSAD_237419.t1	Medtr8g042410.1	At5g06100	At4g10850	MindID:11477	MSAD_256283.t1	Medtr3g080990.1	Bidirectional sugar transporter SWEET
MsMYB045	MSAD_237419.t1	Medtr8g042410.1	At5g06100	At4g13510	MindID:1146	MSAD_224388.t1	Medtr1g045550.1	Ammonium transporter
MsMYB045	MSAD_237419.t1	Medtr8g042410.1	At5g06100	At4g15620	MindID:1317	MSAD_241219.t1	Medtr4g118810.1	CASP-like protein
MsMYB045	MSAD_237419.t1	Medtr8g042410.1	At5g06100	At4g16620	MindID:4255	MSAD_242540.t1	Medtr4g100840.1	WAT1-related protein
MsMYB045	MSAD_237419.t1	Medtr8g042410.1	At5g06100	At4g21680	MindID:11515	MSAD_215893.t1	Medtr4g098800.1	Peptide/nitrate transporter
MsMYB045	MSAD_237419.t1	Medtr8g042410.1	At5g06100	At4g21940	MindID:11583	MSAD_288139.t1	Medtr4g132070.1	Calmodulin-domain kinase CDPK protein
MsMYB045	MSAD_237419.t1	Medtr8g042410.1	At5g06100	At4g24460	MindID:1475	MSAD_264245.t1	Medtr3g099780.1	CRT (Chloroquine-resistance transporter)-like transporter putative
MsMYB045	MSAD_237419.t1	Medtr8g042410.1	At5g06100	At4g28330	MindID:1000	MSAD_302842.t1	Medtr4g078240.1	Transmembrane protein putative
MsMYB045	MSAD_237419.t1	Medtr8g042410.1	At5g06100	At4g30660	MindID:1227	MSAD_317635.t1	Medtr4g130660.1	Low temperature and salt responsive family protein
MsMYB045	MSAD_237419.t1	Medtr8g042410.1	At5g06100	At4g31340	MindID:1811	MSAD_296233.t1	Medtr3g109330.3	Myosin heavy chain-like protein
MsMYB045	MSAD_237419.t1	Medtr8g042410.1	At5g06100	At4g31840	MindID:3346	MSAD_229897.t1	Medtr3g105930.1	Early nodulin-like protein
MsMYB045	MSAD_237419.t1	Medtr8g042410.1	At5g06100	At4g32600	MindID:3325	MSAD_283672.t1	Medtr1g011380.1	Zinc finger C3HC4 type (RING finger) protein
MsMYB045	MSAD_237419.t1	Medtr8g042410.1	At5g06100	At4g36850	MindID:717	MSAD_213556.t1	Medtr5g019120.1	PQ-loop protein/transmembrane family protein
MsMYB045	MSAD_237419.t1	Medtr8g042410.1	At5g06100	At4g39350	MindID:627	MSAD_332716.t1	Medtr8g092590.1	Cellulose synthase
MsMYB045	MSAD_237419.t1	Medtr8g042410.1	At5g06100	At5g01690	MindID:2797	MSAD_328272.t1	Medtr5g074360.1	Cation/H+ exchanger 3
MsMYB045	MSAD_237419.t1	Medtr8g042410.1	At5g06100	At5g02620	MindID:11496	MSAD_241628.t1	Medtr4g062100.1	Ankyrin repeat plant protein
MsMYB045	MSAD_237419.t1	Medtr8g042410.1	At5g06100	At5g03180	MindID:1703	MSAD_274368.t1	Medtr1g064710.1	RING/U-box protein
MsMYB045	MSAD_237419.t1	Medtr8g042410.1	At5g06100	At5g05820	MindID:2240	MSAD_218167.t1	Medtr3g070000.1	Triose-phosphate transporter family protein
MsMYB045	MSAD_237419.t1	Medtr8g042410.1	At5g06100	At5g08050	MindID:782	MSAD_255941.t1	Medtr3g026020.1	Plant/F13G24-250 protein
MsMYB045	MSAD_237419.t1	Medtr8g042410.1	At5g06100	At5g10840	MindID:2094	MSAD_300883.t1	Medtr1g014080.1	Transmembrane 9 superfamily member
MsMYB045	MSAD_237419.t1	Medtr8g042410.1	At5g06100	At5g13400	MindID:11536	MSAD_291380.t1	Medtr7g006540.1	Peptide transporter
MsMYB045	MSAD_237419.t1	Medtr8g042410.1	At5g06100	At5g14030	MindID:2616	MSAD_290562.t1	Medtr7g083560.1	Translocon-associated protein beta family-like protein
MsMYB045	MSAD_237419.t1	Medtr8g042410.1	At5g06100	At5g15500	MindID:3386	MSAD_275795.t1	Medtr8g073260.1	Ankyrin repeat protein
MsMYB045	MSAD_237419.t1	Medtr8g042410.1	At5g06100	At5g17420	MindID:485	MSAD_317649.t1	Medtr4g130510.1	Cellulose synthase
MsMYB045	MSAD_237419.t1	Medtr8g042410.1	At5g06100	At5g19700	MindID:656	MSAD_296086.t1	Medtr6g088805.1	Protein DETOXIFICATION
MsMYB045	MSAD_237419.t1	Medtr8g042410.1	At5g06100	At5g20230	MindID:2482	MSAD_319547.t1	Medtr4g114870.1	Plastocyanin-like domain protein
MsMYB045	MSAD_237419.t1	Medtr8g042410.1	At5g06100	At5g38660	MindID:1702	MSAD_275388.t1	Medtr6g017260.1	Thylakoid membrane slr0575-like protein
MsMYB045	MSAD_237419.t1	Medtr8g042410.1	At5g06100	At5g40380	MindID:6513	MSAD_271007.t1	Medtr7g033135.1	Cysteine-rich receptor-kinase-like protein
MsMYB045	MSAD_237419.t1	Medtr8g042410.1	At5g06100	At5g41940	MindID:17583	MSAD_238965.t1	Medtr3g092100.1	Rab GTPase activator
MsMYB045	MSAD_237419.t1	Medtr8g042410.1	At5g06100	At5g43420	MindID:3110	MSAD_320414.t1	Medtr1g074190.1	RING-H2 finger protein ATL16 putative
MsMYB045	MSAD_237419.t1	Medtr8g042410.1	At5g06100	At5g45770	MindID:889	MSAD_247630.t1	Medtr2g016620.1	LRR receptor-like kinase family protein
MsMYB045	MSAD_237419.t1	Medtr8g042410.1	At5g06100	At5g47530	MindID:1637	MSAD_317423.t1	Medtr2g026080.1	Auxin-responsive family protein
MsMYB045	MSAD_237419.t1	Medtr8g042410.1	At5g06100	At5g47610	MindID:4197	MSAD_316428.t1	Medtr8g093010.1	RING-H2 finger protein ATL1L
MsMYB045	MSAD_237419.t1	Medtr8g042410.1	At5g06100	At5g47910	MindID:3618	MSAD_272045.t1	Medtr3g098380.1	Respiratory burst oxidase-like protein D
MsMYB045	MSAD_237419.t1	Medtr8g042410.1	At5g06100	At5g49130	MindID:2878	MSAD_326387.t1	Medtr2g435930.1	Protein DETOXIFICATION
MsMYB045	MSAD_237419.t1	Medtr8g042410.1	At5g06100	At5g61700	MindID:6793	MSAD_282941.t1	Medtr3g437870.1	ABC transporter A family protein
MsMYB045	MSAD_237419.t1	Medtr8g042410.1	At5g06100	At5g63050	MindID:1175	MSAD_235650.t1	Medtr4g105500.1	Embryo defective 2759 protein putative
MsMYB045	MSAD_237419.t1	Medtr8g042410.1	At5g06100	At5g66160	MindID:1181	MSAD_303628.t1	Medtr1g096780.1	Protease-associated (PA) RING/U-box zinc finger protein
MsMYB064	MSAD_245323.t1	Medtr3g461490.1	At5g56110	At1g10210	PubMedID:19095804	MSAD_330884.t1	Medtr3g112210.1	Mitogen-activated protein kinase
MsMYB064	MSAD_245323.t1	Medtr3g461490.1	At5g56110	At3g45640	PubMedID:19095804	MSAD_308489.t1	Medtr4g061130.1	Mitogen-activated protein kinase
MsMYB076	MSAD_249275.t1	Medtr3g064500.1	At5g17300	At1g10210	PubMedID:19095804	MSAD_330884.t1	Medtr3g112210.1	Mitogen-activated protein kinase
MsMYB076	MSAD_249275.t1	Medtr3g064500.1	At5g17300	At2g43790	PubMedID:19095804	MSAD_320162.t1	Medtr4g087620.2	Mitogen-activated protein kinase
MsMYB076	MSAD_249275.t1	Medtr3g064500.1	At5g17300	At3g45640	PubMedID:19095804	MSAD_308489.t1	Medtr4g061130.1	Mitogen-activated protein kinase
MsMYB076	MSAD_249275.t1	Medtr3g064500.1	At5g17300	At5g19010	PubMedID:19095804	MSAD_232019.t1	Medtr2g021330.1	Mitogen-activated protein kinase
MsMYB081	MSAD_250377.t1	Medtr5g038910.1	At2g02820	At2g43790	PubMedID:19095804	MSAD_320162.t1	Medtr4g087620.2	Mitogen-activated protein kinase
MsMYB081	MSAD_250377.t1	Medtr5g038910.1	At2g02820	At3g45640	PubMedID:19095804	MSAD_308489.t1	Medtr4g061130.1	Mitogen-activated protein kinase
MsMYB081	MSAD_250377.t1	Medtr5g038910.1	At2g02820	At4g01370	PubMedID:19095804	MSAD_263875.t1	Medtr7g078690.1	Mitogen-activated protein kinase
MsMYB081	MSAD_250377.t1	Medtr5g038910.1	At2g02820	At4g11330	PubMedID:19095804	MSAD_314241.t1	Medtr7g078690.1	Mitogen-activated protein kinase
MsMYB099	MSAD_260349.t1	Medtr5g014990.1	At3g49690	At2g43790	AI-1 MAIN&nbspdoi:10.1126/science.1203877	MSAD_320162.t1	Medtr4g087620.2	Mitogen-activated protein kinase
MsMYB099	MSAD_260349.t1	Medtr5g014990.1	At3g49690	At5g62090	AI-1 MAIN&nbspdoi:10.1126/science.1203877	MSAD_267845.t1	Medtr3g089075.2	Transcriptional corepressor SEUSS
MsMYB105	MSAD_263886.t1	Medtr8g028655.1	At4g01280	At3g59790	PubMedID:19095804	MSAD_320162.t1	Medtr4g087620.2	Mitogen-activated protein kinase
MsMYB113	MSAD_268202.t1	Medtr4g073420.1	At4g38620	At1g15750	AI-1 MAIN&nbspdoi:10.1126/science.1203877	MSAD_240341.t1	Medtr4g009840.1	Topless
MsMYB113	MSAD_268202.t1	Medtr4g073420.1	At4g38620	At4g00480	185590	MSAD_278175.t1	Medtr8g098275.1	BHLH transcription factor
MsMYB113	MSAD_268202.t1	Medtr4g073420.1	At4g38620	At4g09820	185598	MSAD_320278.t1	Medtr1g072320.1	BHLH transcription factor
MsMYB118	MSAD_270934.t1	Medtr6g092540.1	At5g56840	At1g10210	PubMedID:19095804	MSAD_330884.t1	Medtr3g112210.1	Mitogen-activated protein kinase
MsMYB118	MSAD_270934.t1	Medtr6g092540.1	At5g56840	At2g43790	PubMedID:19095804	MSAD_320162.t1	Medtr4g087620.2	Mitogen-activated protein kinase
MsMYB118	MSAD_270934.t1	Medtr6g092540.1	At5g56840	At3g45640	PubMedID:19095804	MSAD_308489.t1	Medtr4g061130.1	Mitogen-activated protein kinase
MsMYB118	MSAD_270934.t1	Medtr6g092540.1	At5g56840	At4g01370	PubMedID:19095804	MSAD_263875.t1	Medtr7g078690.1	Mitogen-activated protein kinase
MsMYB132	MSAD_278758.t1	Medtr4g019370.1	At3g09230	At3g59790	PubMedID:19095804	MSAD_320162.t1	Medtr4g087620.2	Mitogen-activated protein kinase
MsMYB137	MSAD_283540.t1	Medtr3g074520.1	At1g34670	At2g43790	PubMedID:19095804	MSAD_320162.t1	Medtr4g087620.2	Mitogen-activated protein kinase
MsMYB137	MSAD_283540.t1	Medtr3g074520.1	At1g34670	At3g45640	PubMedID:19095804	MSAD_308489.t1	Medtr4g061130.1	Mitogen-activated protein kinase
MsMYB141	MSAD_284068.t1	Medtr1g085640.1	At4g01680	At1g10210	PubMedID:19095804	MSAD_330884.t1	Medtr3g112210.1	Mitogen-activated protein kinase
MsMYB141	MSAD_284068.t1	Medtr1g085640.1	At4g01680	At2g43790	PubMedID:19095804	MSAD_320162.t1	Medtr4g087620.2	Mitogen-activated protein kinase
MsMYB141	MSAD_284068.t1	Medtr1g085640.1	At4g01680	At3g45640	PubMedID:19095804	MSAD_308489.t1	Medtr4g061130.1	Mitogen-activated protein kinase
MsMYB141	MSAD_284068.t1	Medtr1g085640.1	At4g01680	At4g01370	PubMedID:19095804	MSAD_263875.t1	Medtr7g078690.1	Mitogen-activated protein kinase
MsMYB144	MSAD_284137.t1	Medtr1g086510.1	At1g48000	At2g18170	PubMedID:19095804	MSAD_330884.t1	Medtr3g112210.1	Mitogen-activated protein kinase
MsMYB144	MSAD_284137.t1	Medtr1g086510.1	At1g48000	At3g59790	PubMedID:19095804	MSAD_320162.t1	Medtr4g087620.2	Mitogen-activated protein kinase
MsMYB153	MSAD_287819.t1	Medtr3g083540.1	At3g13540	At1g63650	185575	MSAD_278175.t1	Medtr8g098275.1	BHLH transcription factor
MsMYB153	MSAD_287819.t1	Medtr3g083540.1	At3g13540	At4g09820	185593	MSAD_320278.t1	Medtr1g072320.1	BHLH transcription factor
MsMYB184	MSAD_303035.t1	Medtr1g043080.1	At3g23250	At2g43790	PubMedID:19095804	MSAD_320162.t1	Medtr4g087620.2	Mitogen-activated protein kinase
MsMYB184	MSAD_303035.t1	Medtr1g043080.1	At3g23250	At3g26744	PubMedID:17015446	MSAD_264134.t1	Medtr3g498695.1	BHLH transcriptional factor
MsMYB195	MSAD_306780.t1	Medtr4g100630.1	At5g47390	At1g10210	PubMedID:19095804	MSAD_330884.t1	Medtr3g112210.1	Mitogen-activated protein kinase
MsMYB195	MSAD_306780.t1	Medtr4g100630.1	At5g47390	At1g18150	PubMedID:19095804	MSAD_211058.t1	Medtr8g106960.1	Mitogen-activated protein kinase
MsMYB200	MSAD_309143.t1	Medtr7g461410.1	At5g02320	At2g43790	PubMedID:19095804	MSAD_320162.t1	Medtr4g087620.2	Mitogen-activated protein kinase
MsMYB200	MSAD_309143.t1	Medtr7g461410.1	At5g02320	At3g45640	PubMedID:19095804	MSAD_308489.t1	Medtr4g061130.1	Mitogen-activated protein kinase
MsMYB202	MSAD_309615.t1	Medtr2g095520.1	At2g36890	At1g10210	PubMedID:19095804	MSAD_330884.t1	Medtr3g112210.1	Mitogen-activated protein kinase
MsMYB204	MSAD_310752.t1	Medtr2g100930.1	At3g16350	At3g59790	PubMedID:19095804	MSAD_320162.t1	Medtr4g087620.2	Mitogen-activated protein kinase
MsMYB206	MSAD_312008.t1	Medtr5g037080.1	At1g70000	At4g11330	PubMedID:19095804	MSAD_314241.t1	Medtr7g078690.1	Mitogen-activated protein kinase
MsMYB232	MSAD_317146.t1	Medtr2g096380.1	At3g46130	At2g43790	PubMedID:19095804	MSAD_320162.t1	Medtr4g087620.2	Mitogen-activated protein kinase
MsMYB237	MSAD_320771.t1	Medtr3g064500.1	At5g17300	At1g10210	PubMedID:19095804	MSAD_330884.t1	Medtr3g112210.1	Mitogen-activated protein kinase
MsMYB237	MSAD_320771.t1	Medtr3g064500.1	At5g17300	At2g43790	PubMedID:19095804	MSAD_320162.t1	Medtr4g087620.2	Mitogen-activated protein kinase
MsMYB237	MSAD_320771.t1	Medtr3g064500.1	At5g17300	At3g45640	PubMedID:19095804	MSAD_308489.t1	Medtr4g061130.1	Mitogen-activated protein kinase
MsMYB237	MSAD_320771.t1	Medtr3g064500.1	At5g17300	At5g19010	PubMedID:19095804	MSAD_232019.t1	Medtr2g021330.1	Mitogen-activated protein kinase
MsMYB253	MSAD_326870.t1	Medtr8g063600.1	At5g08520	At1g32540	doi:10.1126/science.1203659	MSAD_318785.t1	Medtr4g098500.3	LSD1-type zinc finger protein
MsMYB253	MSAD_326870.t1	Medtr8g063600.1	At5g08520	At1g60670	doi:10.1126/science.1203659	MSAD_220095.t1	Medtr4g074120.2	DUF3755 family protein
MsMYB253	MSAD_326870.t1	Medtr8g063600.1	At5g08520	At2g43790	PubMedID:19095804	MSAD_320162.t1	Medtr4g087620.2	Mitogen-activated protein kinase
MsMYB253	MSAD_326870.t1	Medtr8g063600.1	At5g08520	At3g45640	PubMedID:19095804	MSAD_308489.t1	Medtr4g061130.1	Mitogen-activated protein kinase
MsMYB265	MSAD_332735.t1	Medtr8g093080.1	At5g45420	At3g50910	AI-1 MAIN&nbspdoi:10.1126/science.1203877	MSAD_212134.t1	Medtr5g020870.1	Plant/F18B3-190 protein putative
MsMYB265	MSAD_332735.t1	Medtr8g093080.1	At5g45420	At4g19030	AI-1 MAIN&nbspdoi:10.1126/science.1203877	MSAD_247676.t1	Medtr8g087720.1	Major intrinsic protein (MIP) family transporter
MsMYB265	MSAD_332735.t1	Medtr8g093080.1	At5g45420	At5g22290	AI-1 REPEAT&nbspdoi:10.1126/science.1203877	MSAD_268697.t1	Medtr2g086880.2	NAC transcription factor-like protein
