# Supplementary material for: MYB transcription factors in alfalfa (Medicago sativa): genome-wide identification and expression analysis under abiotic stresses
Source: PeerJ. 2019 Sep 17;7:e7714. doi: 10.7717/peerj.7714 (PMC6753925; doi:10.7717/peerj.7714)
Supplement: Supplemental Information 16 — The expression levels of these interaction genes with the absolute value of fold change ≥ 2. The “At gene 2” and “Ms gene 2” are interaction genes of the “At gene 1” and “Ms gene 1,” respectively. The “At gene 1,” “Ms gene 2,” “Mt gene1,” and “Mt gene2” are homologous genes of the “Ms gene 1,” “At gene 2,” “Ms gene 1,” and “Ms gene 2,” respectively. The MYB-core motifs (C/TNGTTA/G) were searched in the upstream sequence (2,000 bp) of the homologous genes of interacting genes in M. truncatula. [file peerj-07-7714-s016.xlsx]

## Sheet: Sheet1
Table S9. Summary information for the 914 protein-DNA interactions.
Gene name (Ms gene 1)	Ms gene 1	Mt gene 1	At gene 1	At gene 2	BIND/PubMed record	Ms gene 2	Mt gene 2	CAGTTA	CAGTTG	TAGTTA	TAGTTG	CTGTTA	CTGTTG	TTGTTA	TTGTTG	CGGTTA	CGGTTG	TGGTTA	TGGTTG	CCGTTA	CCGTTG	TCGTTA	TCGTTG	Upstream sequence (2000 bp)
MsMYB003	MSAD_211637.t1	Medtr5g016510.1	At4g37260	At4g33330	PubMedID:25533953	MSAD_308406.t1	Medtr1g019540.1				√			√	√		√	√	√	√				AGAAGGTAGTTGAAACCAAACTATCTATAGTCCATACCGTATAGAATGTTTTTTGAAGAAGTTCATACATACCGTAGAGTATAAGTATAGTTGACAGCAATATGAATTGATGGATGAATTATTTGATCATATATATACGCCTATAATCCTTTGAGTATTATTAATTAATTAATGTTATTCATGCATAACAATAGAGCCAAACCAATCATAGTTCATAACCAATAAAATATCTAAGAAGGGGGTGTTAGAAGCGCTTTATCTTCAACATTCATTCTCTTATTGATCGAAATTCACGTTGACTAAATTTGAATACATAATATAAAAGCTTTAATAACCTCATATTTTAAAAAATTGATTATTAGAAAACATAGTGGAGACAGAGAGAATTACCCTTGTTGT…
MsMYB003	MSAD_211637.t1	Medtr5g016510.1	At4g37260	At1g71930	PubMedID:22037706	MSAD_303601.t1	Medtr1g096430.1				√			√	√			√	√				√	CTCAAACTCTGGATACAGTTCACCAATTACACCACAAACTGCAGATAATTGATATTGTAATTTAGGTCCTTTTATTATAGATTAAAAAATATATTTTAAATAAATTTTTTATGAGAACTTATAAAAAAAAATAGAAAATCTACTTAGAACTCATTTGTTATGAACTAAAATATTAATTTTGACATGTAGCAACTTAGATATTCATTGTTGAAGATTTGATATAAAAATTACATATTTTTCAAATAGAGACTTCTCAAAAACGATTTTTTATTAGAAACTACTCAAATAACTTTTCATTTAAACATTTGTTTTAAATATTATTCAAAAATTGTAGCAAAAGGATGAATAACTCTTAAATAATATTGTAAAATTGTTTAATCCAACGTTTCATTTGAAGTT…
MsMYB003	MSAD_211637.t1	Medtr5g016510.1	At4g37260	At3g19450	PubMedID:25533953	MSAD_270181.t1	Medtr1g107425.1				√				√			√				√	√	GGTGTGTCGCGGCTGGTCTGTAGGTGCAACACTTGCTGCTGCTGTTCGGTTTTCGGGAGCAGTTTTTATTGTATTTTTCTGCTGGGAGCTTTTCGGCTAGCTATGTTGGGCTTGACAGGGGGTAGGCCTGTGGTTTTCTTTTGCCAGCCACTGTGTGTTTGTTTTATTGGCATGGTTTGTTTCATTGTTTTTGTGTTGCCTCTGTTTTTACATTTTTTCAAGCTTATTAGTGCTCCTTGCACGGACTTGTGATCAATAATATTCGCCTTTTAAAAAAAAAGAGTTTATTATCTTATACTATTAATTTCTCGCGCGTCCTACAATTATGTAAAAACACCCTCCGACACAAGTTTTACACTTTGCATCCTAAATATCACCCTTCGTTGGAGCATAATATAT…
MsMYB003	MSAD_211637.t1	Medtr5g016510.1	At4g37260	At4g18780	PubMedID:25533953	MSAD_271394.t1	Medtr2g016630.1				√		√	√	√			√						ATTTTTATCTTGTTTTGCTTGAACATTGTTGCCTAGATACAATTTCATTTTTTTGTGACTTTTTTTCTCTTTCAAACTCAAACCCAAAGTGTTATAAAATGAAGAATTTTTTTATTTACATTGAATTGGCTTTTGAGTAGAAATAGAAGGTGTGAATGACCAAGATATCAGGTGGACATTTTTTGGCTGAGTTCCTGAAAATCACCATGCACTTCATTGTTATGTGATAGTATATAAGGCGTGAGCTTTTTGACAATAACTTTACGATTGATGGAGACAAATCCACAATTAAATGATTAAAAGAACAAGATTGCGAGCTGCAAGTAACCTTTAAATGAAATGAAGTGGCAAGCGCCAACGACATGTTCTTGCATATTATAATATCTCTACTAATCGAAT…
MsMYB003	MSAD_211637.t1	Medtr5g016510.1	At4g37260	At5g49720	PubMedID:25533953	MSAD_318086.t1	Medtr2g028480.1	√		√	√			√	√	√		√	√				√	AATACTCAGAGAAATTGGACTGAGCATTTATGTTCATAGTTAAAAAAACTTAATTCGTAGAATTGTGATTTGTACAATAAGAATTATGGATATCGTAGAAATCAAATTATAGGTATCATTGAATGATAGTAGTATATAATTATAGATGTCAAATAACTTCATTATAAATTTGATGTATTTTGAATTATAAATCAGATTGCAACTATAAAAAACAACCCTCTAAAAGAAACTATAAAAGTAACTATTTTTTTGTGTGACTCATATAAAAAAGTAATTCTTAGGGAAAATATATTTTGTAAATAAAAATCAATGTATTTCACATAAAATCTAATATCTTATTTAAATTATTTATATTTAAATTATGCATATTCGTTTTGTAATGTTTTTTTTATTTTATCA…
MsMYB003	MSAD_211637.t1	Medtr5g016510.1	At4g37260	At2g34710	PubMedID:25533953	MSAD_299442.t1	Medtr2g030130.1			√				√	√		√					√		TTCTTTCGATCACCCTTTCCCATAACTTCATTAAAATTTTCAAGCGTATGCCATACATTCTGTTTATTTTTGCATGTGTTTTAAATCTGCAGCTTTTTGAAAAAAATGGTTTCCACCATCTTAATTTCCACCCTCTTCATTAATTTAATAATACACACACATATATTCTCCTTCTCTTCACTAAACAACAAATAAAAAAATAAAAAACAAAAAGGATGGGGAAGGTAAAGATGCCGTGAGAAATGAGAATACGATGGACGGCGTCACGGCATGCATGCATTACCGTTTCACAGAATAGCACGCAATTACAATGAATGTTGTTATCTAATCAAACGGTTGTAACTGAATGTCCTCATAGTTTTCAGTAGAGTACATATATCTTGTGCTCATCAGGTGGTC…
MsMYB003	MSAD_211637.t1	Medtr5g016510.1	At4g37260	At5g44030	PubMedID:25533953	MSAD_252569.t1	Medtr2g035780.1				√				√									AAAATATCTTTTGCAGTTCGGATTACGTAATCCTAACTATGCTTATGTATAATCAACGATCATAATCTCTCCCATTTCAGCAATTTTAAATTTTGCTTTTAAAAATAACCAAAAAAATCAAGTAAAGAAATGATAAAAACTTGTCAAATAAAATGATAAAAACACAAGGATGAGAGTTAGGAGATTAATATTATTTTTAAAATGACTATCCATGTTACAAACATGTTTAAAAAAAAAAAGACAAAAACTTTCTAATTTTTTTTTTGTACAACAAGCTTTCTAAAATATTATCATTCAAGAAATTAAATGTGTCGAATTTTGAATTTAAGCATTTCCCTTCATTTACTTTAATATGCAAATTTACTTTCAAGTCTTTACATACAAAGAACTTTAAAAGAT…
MsMYB003	MSAD_211637.t1	Medtr5g016510.1	At4g37260	At2g25450	PubMedID:25352272	MSAD_244362.t1	Medtr2g069210.1		√	√		√		√				√	√			√		GAGCTTAACTCAGTTGATAAGGACAATGTATAATATATGCAAGGCCCGGGGCTTTAGAAGGAGAAAATTGTGAATTGTTAAAAAGCACTTATTTATTATTAATATTTTTTGTGAAAAAAATGATTTTTGGACTTTAAATTATATAAATAAATAATTATTAAATTTGCATTTGAATAAAAAACTAAATATCCTTATTTAAATGTTTGTTTGTTATTGGTAAGAGAAAATTGTGGATTGAAAAATCACTTGTATGAATGAAAAAAGAATTTTGTGCATTGCAGGGAAATTAAAGGCATAAGGGGATTTCTTAAAAAAAAAAAAAAAGCATAAGGGGATGTCAATTGTAAAAAAAAAATAAACTAAGGAAGGGGGTGTCATTTGTCAATTGTTATATATATT…
MsMYB003	MSAD_211637.t1	Medtr5g016510.1	At4g37260	At2g20610	PubMedID:25352272	MSAD_265971.t1	Medtr2g090615.1			√				√	√									AAATAAAAATGTTAAATTTTAAAAACATGAAATCTAATTTGAGCACAATCTCTACATTACTTGGGACTATAATTAGTGTAAATGGGACCATATTTTGCCTTTAAACACTGATTAAGCCACAACATCAATTAAACACTGATCTAATAATTACAAATAGTCTTTCTAAATCTAGATTTATAGCACATAAAATTAGTACATAAAATTATAATATTTTAGTTAGTATATGCCTCCCTCTAATTTTTTAGGCAATATTCGCTGAGGATTTCCTTGAAATTTGGGATTTTCTTTACTTTTTTGGTCAGACTATTTTTTATTTTTAAATTCCATTTCATCTTTTTTTGTTATAGAGCAATTGTTTTTCAACCAAAAATAAGGTAAAATATAATTGCCTTTAAATTC…
MsMYB003	MSAD_211637.t1	Medtr5g016510.1	At4g37260	At1g51680	PubMedID:25533953	MSAD_299015.t1	Medtr2g105570.1			√	√			√	√			√	√					GGTATGGCCCATATACATTGTAACACAACGAAATGGTCAATTTACATTGTAGCACAATGGTATGGTCCATATACACCAATGTATGTTAAGCACTCAAAAATATAATTTTTAATGAATTGAAAAATATAGCAATTAAATCTTGTATGAGAATTTAGTGTTCGACACGTCCGGAATAGAATTACCTTATGTGGAGAGAACATTTGAGTAAAAGAATATAAGAAAAGTTTAGATTAAGGAAATAGCTCGATGCTAATGTAGGAAACCATTGATAAACTCAATGAGTTCGAGAATTATATTCTTACCCCGCCTCAAAAGGACTAATGAGAAATCAAACCATTAAGATAAGAAGTCATATACAAGCAATGTCATACGTTAATGAGAAACGTTGTTTTGATACGT…
MsMYB003	MSAD_211637.t1	Medtr5g016510.1	At4g37260	At3g18660	PubMedID:25533953	MSAD_323268.t1	Medtr3g095910.1	√		√	√	√		√				√						TATTTCAACATTTTAATGTGATCATGGTTTACAAAATATTATTGAGGTTTATGTATTCTAATTTTAGACATATACTACTATAAAATATGCTGCATAGGATGAAGTTGCTGGCATACTTAGCGATGGGTGCAAGGCTTCCATATCTTTTTCAATTCAACCATTGAATTGAAGTACAAGTCAGTTCAGTTATATCACCGCCTCTGGTTCAATTCAGTTAGACTGTTAAGACTTAAGAATCCTTCAATTAATAAATGACAATTTCTTCCCTATACTATTTTTTCCTCTACTATAGTCTTTACTTAAATGCAAAGACTAGTAAGATAAATTAATACAAGATGTGACAGAAGTGAACAGATAAAGCTGGTCAACAGGTGATATGTTTCGGCTTATAAACATTAT…
MsMYB003	MSAD_211637.t1	Medtr5g016510.1	At4g37260	At5g48930	PubMedID:25533953	MSAD_297133.t1	Medtr4g007540.2				√			√				√	√				√	TGTTATATTCTGAACAAAGATGATATAAGAATGGAACGTGTTGGCAGTGTTGTAAATGAGATATTTGGTTCTCTCGCATCATCCGATGTTTTCATGTTTTACCTGTTTTCAAGTTTCCGAGTGTTTTGTTAAAACTTGTGTTGGATTAGTTTTCATTTAGCGTTTAATTGAAAGACTTGTCTTGTTAGTAACTTTGGGTTCAAAGCATGAACCATAAACGTCAACAAGGCATGAACCAAAAAGACCCAACCTAATTGTCTATGAAAGCAGAGGTATGCGGTATGAAACTAAAAAATAAAGCTGGTGTGGAGACTTCATATATCAGTTTAAGCAAGAAAAGGCTAATGTATAAATAAGTTAACTTATTTATATACTTAAAGTTCGTAGGTGTTTGAGGGG…
MsMYB003	MSAD_211637.t1	Medtr5g016510.1	At4g37260	At4g31500	PubMedID:25352272	MSAD_316759.t1	Medtr4g026050.1					√		√			√		√		√			TGAGTTTGCATTCCAAATTTCCAATAACAGCAACAGGAAAAAAAAAAATCTTAACATATAAATTATCAAAGTTGGATAGCTGAACTGATTTAACTTAAAAAATAAGAAATCTAGGCCGAAATATGTAAACCCAATTCATTATCTTTCTACTTCTTAAATTCAAAAGAGTTTTACTAATCACTGCTATCTCCCCTCAAAGATTCATGTTCCTTCATTTGGTTTTAACTATATGAATGCATTATCATTTTCTTCATTGATTTCACTTTATATTTCATTCTGTGCTTTTCTAATCTCTGCCAAACTTCCAGATGCAGTTTTAATCCGAAGATCCATTTATCATGCTCTTTGTTCCATACTTCCATCGGTCTTTTGTCGGTGATATTTTTTTCGACTGCGATT…
MsMYB003	MSAD_211637.t1	Medtr5g016510.1	At4g37260	At2g28110	PubMedID:25533953	MSAD_251766.t1	Medtr4g057500.1			√	√			√	√		√	√				√		TTGTCTTTTTAATATCACTCCGATAGATAATTTAATGTTTCACAATTTTTTATAAGAAGATATTTGTAAAAATATTTATAAAGTTATAACAATTATTAATTACATTTATTTTGACGTTTTTTATTTTATTTTTCTTCTTATAATAAAGACGATGGAGAGTAATATGTTAGCATTGGTGGAGGGTGGTTAGATTCATGATCGCCCACTTTTAATATGTTCTAGATAGTAACAAATTTTGGTGCCATTGCATTCATAAAAATGTCTTTTTCTTTTATGTATGTGTGTTTTTTTTTTTAACAAATCAAAATAGGATATATTGCTCAAACAAGATGTGATTCATCCCGTACAAGATGTGCTAATAGTGGTAAAATCACAAAGTATCTGATACAAACAGCAGAC…
MsMYB003	MSAD_211637.t1	Medtr5g016510.1	At4g37260	At5g12870	PubMedID:25533953	MSAD_239320.t1	Medtr4g065017.1	√		√				√	√									TCTGCTTCTAGCTTTGAGAATAAATTTAGAACTAAATATGCTTCGCCAAACAAAGTTAAATTTATGTCCCAAAGTCGACTCAAAGAAATTACACCTAGCATAGTATCTTGACTTATATAAAGTCGAGCTACCAACAAACCAAGATTTATCATAAGTCTCCAACACTGTTTTCCTAACATAGCTAGATTAAAGGTAGGTAGATTTTTAAAACTCATACCACCATCATTCTTGTGCATCGATTTATTTCTCTTAAGTTCTCATATGAAAACATATTATAGTTTATATAAAAATAATTTAGCTTTGTTAATAAAAAAACATGTTTTTTCATAAGTTCTCGTATATAAATAGATTATAGTTAAGACTAACACTTATTAGACTTTTAACTCTACCAATTATGGG…
MsMYB003	MSAD_211637.t1	Medtr5g016510.1	At4g37260	At4g28370	PubMedID:25533953	MSAD_302881.t1	Medtr4g078525.1	√	√	√	√	√			√				√					TGTCCAACTCGTCGCCAAGATTTACCCTGCTGAGTCAGTCCCTTCTACAGCAGAATTGAGAGAGCTTTTAGCTAAAATGTAAAGGTTTATGCGTGTCTACATTTAGTCGTTCTTTTTTACTAAGATGAAATGTAATTTACTTAATTGTAGTGCATTTCTATGATTTTAATTACTTGAAACAAGCATTTCATGTTTTGATATTAATTATTTGTGTTTTTCTTTATAATTATTGTGGTGGGGGACATTGAAAATGGAGAATAACATAATTTGTACTAAAATAACATTATTGTGGCGGGGGACATTGAAAATGGAAAATAACATAATTTGTACTAAAATAGCATAATTAAAACTTTATGTCATATCATAGTTAACACAAAAATCTCTTCAAATTCATACTAT…
MsMYB003	MSAD_211637.t1	Medtr5g016510.1	At4g37260	At3g19710	PubMedID:25352272	MSAD_228893.t1	Medtr4g092590.1			√									√					CCTATCCAAAATCTCAGAAGCTATAATGACAACTTTCAAATTACTCCCCCAACTGCATGGACTGAAGTAGCAAAATACACGCCAGAGATTTATACAGAAAAATGAAGTGCAAAAATATCAGAAATCACTAGCCTAAACCAGATAGAAATCTTCTCTATTTTGACACTAAATTCCTAACAACAGAAAACCAAGGCAAGCACTTGGGTTCAAGAGATTAGGTAGGTGATAAATCTCTGGAGACATGGAAAACAAACTTACCGAGTCTCGAACAATTACTTACCGGAAAAGGGAAACTCAATGAAAATGAAGCACATGTAGTTCAAATCCTTTTGTTTGATAATGAAAGAATGTTCCACTATCTAAAAATAAGAATTGTCCCTTTCAAAAAAAAATAAGAAT…
MsMYB003	MSAD_211637.t1	Medtr5g016510.1	At4g37260	At5g17420	PubMedID:25533953	MSAD_317649.t1	Medtr4g130510.1			√				√	√									TATTTGGTCAAAATTTTAAAGCTGAGCCATTAAAATGGTTTAAATCATTTTATTTGGTCAAACAAAGCTGTACTGCATTAAAATTTTCAATATATATGTCCAAATTTACGAAAGAAAAGTACAGTGATTTATTGTGACTTTGAAAAATAAAAATTCAGCATCTCAATATACTAGTTAAATAAGCTTTATTACGGCAATTTTAAAGAATATTTTATTAATTTGACCAATATTTTATATTCTTTTTTGACATATTTGGGTCAATATTTGATATTCTTATAAAAAGTTTATTGATGTTTTTCTCATTAATAAAAAAGTCGATTAATAAGAACTTTTTTTTTTACTCAATTTTTTTGGGCACAATTCATTATATATATTTGTATCCGTCTATCCGCTATTCTT…
MsMYB003	MSAD_211637.t1	Medtr5g016510.1	At4g37260	At1g62540	PubMedID:25352272	MSAD_210786.t1	Medtr5g012130.1		√		√		√		√							√		ATTATTATTATATTTTTATAAGAGCCAACACATATGAAATGTAAAAAAATGGAGAAGGACATATTTAAACTCGTGCATTAACATAGTAAATGTCTTTTTAATGTGTACTCCTTCCGTTTTTAAATATAAGCAAAATTGACTTTTTAGGTTCATTTATTTAATGATGTATGTGGTTTATAATATGAATGAATCTAAAACATCAATTTTACTTATATTTAAAAACGGATGAAGTAAGTCGTATTTAAGGGGGTAATGAATGAGCTTGGTCCATCTACTTTAGATTTTTTGAAATCAAATATCCTCCCAAAAAGGGTCCGAATCAAAACCATATTCATACGGAACTACATGTACCGAAAAAATAAGCAAACATTTGTTTTTTTCTTTTACAAACATCTATAT…
MsMYB003	MSAD_211637.t1	Medtr5g016510.1	At4g37260	At2g38080	PubMedID:25533953	MSAD_279702.t1	Medtr5g069680.1			√		√		√				√	√					GTATAAAAATACAGTCAAAATATGTCAGTTCAAAATTGTATATTGTCAAACAGGTCATCTAATAAGGGACGGAGCGAGCATAATTTTGAGATTAACATGTTAGCAAGTGATATAGTTCTCAAACTAATTTTATAGTAAGTGAAATACAAATTAATAAAGAGATCAAGGTGTGGAATGTATTCAAAATTAGTGTTTTTTGCTTTGAGGATAAATGTCCGACCCTACAATTTTGGGGACAAATTTATGATTTACTACTCAATAAAGTTATGATTACTTGCAACTGATTTTCACTTTATCTATCTAATTAGTGTTTTTTGAAGAGGTCTACCTTTTTCAAATTTAGTTAGGATCTGAAATTCATTTGATTTTTCTTTCTTAACAACGAATAATATTATACTA…
MsMYB003	MSAD_211637.t1	Medtr5g016510.1	At4g37260	At2g31790	PubMedID:25352272	MSAD_287523.t1	Medtr6g038230.1			√	√		√	√	√		√							CTTAACCGCCATCATCGAAGTTGTTCTAGAAGCTTCTTTTCCCATTAATAACCTATTGGTGTGAAATTCAAGCGCGATGTAGAACCAGACAAGTGGAGTCAATGGGTTTCGAGTGGTGTGAACAATACGTGGAAAAAATGAAATAAGTTAAATTGGTGGTGCTGTTGCGGTATTCGATTAGGAAACAATTGATGGACTCTTTGAGCATTGATTGGCAATAAAGTGGAAGTTGTTTTTGAAGGGTTTTATTGATTCGTTTTTGAAGGAAGTGATGGTGCTGTGAACTTGTGAAAGTGAACGGTGGGAGTGTGGAGTTGAACAATCAATGAAATTGAGAAATGAAGTGATTATTTTATTTTTTTATAAACAAGTTTGTGTCGCTTGATGTTGTGATTATGA…
MsMYB003	MSAD_211637.t1	Medtr5g016510.1	At4g37260	At5g07700	PubMedID:25352272	MSAD_260968.t1	Medtr7g011170.1			√	√			√	√				√					ACACCCCCCTTCCATCCAAGAATTGAACTAATAGAATGTTTTAGACCTGTCGCACATCCTGCACTAAGTTGTCATCAAACCAAATACCCAAAACCCGACCTTTCTACTCGAGGGATAGCCATCATTTGCTTCCCCCCACAATGATCGTAACCGACCACCTACCTAATATAACCACCTTTCTTCCATACCTAGCTACTGATATCTTATACCACAGACTTCCTTGATCCAAAAACATCCTCTAACACCATTTATCTAACAATGACAAATTAAATTCCCGAATTTTATGAACTCCCAGTCCTTTGTTCTCCTTTTCTAAACATTGAGTATCCCACTTAACCCGTGTGATTTTTCTAACATCCTCAATATCCCCACAAAAAGCATTTAAAAATATATTGAATA…
MsMYB003	MSAD_211637.t1	Medtr5g016510.1	At4g37260	At5g15630	PubMedID:25533953	MSAD_239416.t1	Medtr7g015960.1			√	√			√	√				√					ACAATATGAATGAAGCATGATTAGTCAAAAAAAACAAACCAATGAAGCATGTATCTGTTTTACATTTTATGAAGAAGAAAAACTTTCTAACTAAAAAATAGCAATAATAATCAAATAATTTTTGCTTTAAGCCATGCAAAACATGTAAGAAACTTTGGACATGTTATTGATAAGAAAAAACTTAGACAAGTAATTTGCTTAGCTGGATACAGCATAAAGTTCTTGAATTGAATTGAATTGCAACGGCAGAAAAATTATAATTTCCATAAATGATATAATAAAGTGCTTCTTCTATTGGAGTTGGCTTATCTTTGTTGTAAAAGGTTAACATATTTTTGGTAATATACAAGTCCTGCTAGACTAGTATAGTATGTACATGGATGGAACTGGACAATAGGA…
MsMYB003	MSAD_211637.t1	Medtr5g016510.1	At4g37260	At5g60020	PubMedID:25533953	MSAD_301196.t1	Medtr7g458880.1	√		√			√		√									GGTGAAAATGTACTTTTTTAAAGTGATTTTTTTCAATGTTAATGGATAATGGCATTTGTCTTTTATGGGACGACTTTAATTTCTGTATGTAAAGATAATGTAAATTTTTTTAATATTGTGAATCGATCATAATCGATGAATTGTATTTTAATTTTTTTTACATTAATTATATTTCCTTAAAGATTTATCTAGACAATATTCACTTTAAAGATAATTTGTGATTGGGAGTTACGATCAGGAGTTACGACCTGATGCGTATTGATCCATACCGAAATAAAATCAGAAACCACCATTTTTGTGAGGTGGATTCTCTGTCTTTGTACGACGAGATATGGGAGTGATGGTAGGTAGAACACTGTTGATAAGAAGAACATTTCTTATGAAGCTAACAATCTCCAA…
MsMYB003	MSAD_211637.t1	Medtr5g016510.1	At4g37260	At1g18590	PubMedID:25352272	MSAD_321768.t1	Medtr8g066220.1		√		√			√		√		√	√					CTTTCACTGAAGGAGAAAAAAAAACGTATCTTCAGTGTGGTATTCGTTCCAAATTTATGAGTTATACTTTTACTATAAATATAGACCTTGTATCATACTAAACTTTGAGAGATAGAGGGGGCTGAAACAAGGGTTTAGAATGGCAACAACAAAACTAGGGTTTGTATAGAGTTTGTCTTTTTGGAACAAACACTAGGGTTTGAGGATTGATTCACCTTGGGAAACACTATTAGGATTGAGTCTCTTGGTTACGGGAAGAGATTGTGACTTTGGATAGAATTAGGTGGGAGACTTTTTCTTGTAACTCATTGACATCTCTTTTGTAACGTTACTCATCATATAGTGAAACGGAGGGCTGCTCTCTCTCCCCCAGACTAGGTCAATTTGGACCAAACTGGG…
MsMYB003	MSAD_211637.t1	Medtr5g016510.1	At4g37260	At1g16410	PubMedID:25352272	MSAD_244223.t1	Medtr8g073950.1							√	√	√								AACCCTCTACAAATAGATTAAAAGATTCACCAAAGAGGCGGTTAAAGTTCGTGGAGCAAACAACAAACTTAAACACTTTATTTTTTAGAAAGGCTTGAGGCCAAATTGCATGTACAAGGAAAAGTTAATCTTGGAAGAGCCCCAAGAGTGTGAATGAGTTGTTGGTCAAAGCTTAATCCTATATTACCTATGAAGAGAAACTGATCACCGAATAAATTGATGATAAAAAACCTTCCAACTAAGGAGGAAACAAAAATCTATGGGAAAAAAGAGAAAGGGGCAAGGGTAAGTTCGAGGGACGGTGCTATAAGTGTACCCCCTGAACATATTCAATGACATAATTCTCTAAGACTGCGTAAATGTTGGATTCATGGAAGTCGGAGTGAGGAATCCCTCATC…
MsMYB040	MSAD_233710.t1	Medtr6g477860.1	At1g18330	At4g26080	PubMedID:27117388	MSAD_300809.t1	Medtr1g015110.1			√			√			√	√	√	√					ATACAAAACTTTATTCAAATTTATTCAATACGCAACTTTATTTAAATTTATTCAATACGCAACTTTAATCAAAGTACCAAAATATATACCAAAATGCGCAGCATATCAAAAAACATAAAAAAAAAACAAGACATTACAAGCAATTACATTTAATCATCTCCCTCGTCGCTTAAGTGGCTTAAGTGAATTGGATTGTCCCAGATAGTGCCTGGGGCACCTGCTTTTTGGTTGATGACCAGTGGCGGAGCCCTTCATGGGCTGGGGTGGGCCACGGCCCACCCCCGGGAAAATTAAAAAATTAACGATTATAGGTCTATTTTGCGAGATTTTATGCAATTTTGTGTCGATTTTATGTTTTGGTTATCCAAATTCCTGCAAAGTGGTGTAGTGGCTCACCCG…
MsMYB040	MSAD_233710.t1	Medtr6g477860.1	At1g18330	At2g22840	PubMedID:27117388	MSAD_260322.t1	Medtr1g017490.1	√		√				√	√					√				TATGTCAAACAAACTTTGGATATTATTATTAAGGCGAAATTGAATTTTTGGTCCCTTAACTATTTAGGTAGTATCGCTTTGGTCCCTTAACTAAAATTCAATTTATTTTGGTTCCTTAACTTCTTCCCGTTACACATTTTGGTCCTTTCCGTTAGTTTTAATTCAAAAACGTTAGGTTTTCTTCATTTTCTTCTGAAATTTTTATGGGATTCTTGTTGTTGAAAGTTGATGGAGATCATATGAAAATGAAAAAGAGGAAAAGAAGATGAAGAAAACCTAACGTTTTTGAATTAAAACTAGGCTTAATTGCACTTTTGGACCCCTATCTTTCCAAAAGTTGCAGTTATGGACCCCTAACTAATTTAAATACAAAACAACCCCTTATGTTTTGATTCTTTA…
MsMYB040	MSAD_233710.t1	Medtr6g477860.1	At1g18330	At1g19300	PubMedID:27117388	MSAD_231632.t1	Medtr1g021855.1		√					√	√			√	√					CAAAGCTGGATTAAGGACTAAAATGAATCAAGTATGAAAATCGATTCTGAATTGCTGCAAGCTGATGGATTAGGAATCAGATTCGCAAGCTGATTAATCACCATATGATCAGCTTCCGACGTATATAGCATAATAAAGATTTGTAAGCTTTCTTTCAACAACCAGTTGGACCAAACCACTTTACAAACAATCCCATGATGCTGATCAGTGAAAGGAATTTAAGTTGGGAAGATTAGTTTACTTTTCTTACCCTTACCAGGAAAAGTGTAAGTTCAAAGACAAGACATTAATGCATGTTTCCCTACCTAGGATTCAAAGTTAAGCTAACCATTGTTTTAAATGATTTCCTAAAGAAAAATTAATGTTATTGTTGTCACGTTTAAGTCAAATGGTAGCATG…
MsMYB040	MSAD_233710.t1	Medtr6g477860.1	At1g18330	At5g42180	PubMedID:27117388	MSAD_325692.t1	Medtr1g025980.1				√		√		√		√	√	√		√		√	TTATGTTATTTGATTTATGTAATGTGAGTTAGAAATTTCACATTAAATAAAATGTTTAATATGTTTTTTTTTTTGAAAGAATGTTTAATATGTTATTGTTGAGCAACATATACAAGTTAGAAAACCATATATTTAATGTCTTATGATATTTGGGAGTTATGCGAGAAAGAGAGGGAAGGACTTTGAAACGAAAAGAAAAAGTTGAAAGAATGGAGGGATTGGGAAGGGAAGGACTTCGAAAGTGTATCTTGCTTCATATATAACACAAAATCTCATAATTTTGGGGAACTGTATATTAGAGGAGGGTTTTGAAGAGTTTGAATAAATTTTTGAAATCAAACCTTATACTCCCCTGCTCCAAAGCCGTACCTTCCCCTCCAAACACTCAAACACAACCTA…
MsMYB040	MSAD_233710.t1	Medtr6g477860.1	At1g18330	At5g11540	PubMedID:27117388	MSAD_243585.t1	Medtr1g026710.1			√		√		√					√					GAGTGTTTTAAATGACTTTCAGGAAACCTGGTGGCCTTAAGGGTTTGTACACTAAGCCATCATGCTAAGCATGGGAAGACACACCATGACCGAAGTACAATCACAGTACTTAATATGCAACATTACTAGGTTATGTCATTAGTAGCTCTCCAACGATGGAAGCTTCTAAGCCTGACATATGACTAATATACTAAATAGATCACAACGCTTCTCATGGTTCCTCTAAGATCTAATTGGGATTCAAGAAGTCTCTTTTGTTCCCGCCACCTTTACAGATACTTAGGGACGTAATTCATATCAAACACACATTTTTCATTCTCGTCATAATTAAGTCTAAGGAAATTATAACATCACAAATAAAAGAAATAAAAGTGATCAAGTTTTACCTTTAAAGATTTT…
MsMYB040	MSAD_233710.t1	Medtr6g477860.1	At1g18330	At3g57750	PubMedID:27117388	MSAD_225069.t1	Medtr1g027670.1			√	√	√	√	√	√		√	√						AGTTATAGTCAAATTACTGCACGTAGGTCACAGTGAATAATTGAATATGATTGATGAATTAGTATATGAATGTATATGTTGTGAATACGATATTGTCCATGATTGATGAAGTGTTATATGTATATATGATGTTTTAAGATGTTGATTATTATTTGATGTTGTTATACTGTGATATAATTGTATATGCATTACTTGAATTATATGTGAATAATTGAGACGTTGTTGACTTGCATTTGATATTATTATGTCATGCTGTTTTTGTATACTGTTGTGTTGCTGTTGTTATTTAACTAAGCTGCATGAGTCGGTCTAAGTTGATTAAGATGATGAAGTTCCAAATTATTGGATTATATAAGAGGTTGTCGATTAAGATGTTTAAGAGGTCGAGTCTATGCATTA…
MsMYB040	MSAD_233710.t1	Medtr6g477860.1	At1g18330	At4g10750	PubMedID:27117388	MSAD_322822.t1	Medtr1g031790.1	√	√					√									√	CCGAGTCTGGGCACTAGCCCAAGCTAGCTGGGGGGTGGCTCCGCCCCTGATTGGAGATAGACAGACCGGGCATTAGAGAGGATGAACATGAGCTAAAAAAAAAGTGTTAAAAAGGATGAATAATGACAAGGCAGTTAGGTCAGACACCATACATATTAAAATGTAAAAAAGTTTTGAAGCTAAAGATATTGGTAGTGTAATTCATGCTTCTTTTAGAGGAGAGGTTGTAATTTACTCTAAATTTAATTATGTATTTGATTTGTAATGTTAAATAATTAAGAGAGATGCTAACAAATGTCCTTGTTTATAAGTTTATAAGTTTAAAGTAAAAATTTTATCTTAAAAATTATGTATTCAAGACATTGAAATAATAAAAATTAACTTTTTTTACGTAAAATT…
MsMYB040	MSAD_233710.t1	Medtr6g477860.1	At1g18330	At5g63830	PubMedID:27117388	MSAD_322835.t1	Medtr1g032200.1			√	√	√		√	√		√		√					CAATCAAGTTGAGGTTAAACTGAGTTTTTATTTGTTTTCAGCTGCTGGTTTGGGAAACTATGTAGAGGCCCTTGTTCGAAAACATGACACTGAATTCAATGTATGTCACTACAATCCTTTTAACTTTTTTGTTCTATCATTTTTTCCCTCTTATAATTAGCAAAAGCATCAATATAAGTTTATGATTTTAATTAATTGAGATGTTATATAAGCTTTATCATTCATAGCTTGTTATGTCTCTATTTTTCATCGTTTATTCATCACTTGTTCTTGTATATGGATCCATCCATGCTTGTCCCTCTAGTCTTATCGTAAACCTTCAATTAGTGTCTAATTTTGGTAAATTGTAATTGTGTCTTGATTTTTCAATATTTCACTATATCAAATTTGAAAAGTCTC…
MsMYB040	MSAD_233710.t1	Medtr6g477860.1	At1g18330	At2g33150	PubMedID:27117388	MSAD_219546.t1	Medtr1g047210.1	√	√					√					√			√		TTATTTTAATTTTTGAAATCTAAATTTCAGATTTTCTTTCAAAAATTTTAATTTTAATTATTGAAAAAAATTCAGATTTTATTTTCGAATTTTTTTCTTCCAAATTTTGATTTTCAAATAAATAAAATTAAATATCTAACAAAAAATTCAGATTTAAAAAAACAATTATCTTAAATTTTAAATAAATCCTGATTTTTTAAATTTTAATTTCTAAGTTTATTTTCAGATTTTTAATTTTTTAAATATATTTTCAGAATTTTTATTTATAATTTTAAATTTCAAAAAACAATTATTAGAATTTTTAATTCTTTTTAAAATTTTATATTACGTGGACTGCCACATGATAAAAGTTGCACAGTTAACAACTGTCACATGAGCAAACTATGTTATTTCAACGCT…
MsMYB040	MSAD_233710.t1	Medtr6g477860.1	At1g18330	At3g52060	PubMedID:27117388	MSAD_216568.t1	Medtr1g048320.1			√	√	√		√	√									CCCGTTCCCAACATGTTTGGGTATCCCTGCCCTATCCCCATCCCCTCATTGTATAATTTTTTTGAATAAAAATAAAAGTTTTTTTCAGTCCCGATTGCAATGTTGTAATGCATTATATAGTAAAGAGATGACGGTGATCAATGTCTATGGTGATGAAAAATAAAGAGACCTAGAGTGTGATATATAGAAGGAGAAAAGAGAGAATTATGATAAGTGAGTGTCATCTGAAAGACCAAGACTCTAACGGGTGTGAGTGAAATGATTTAGGGTTTGAGTTTTTATTTATATAAAAGGGGTAATACATTGATTTTTTACATTTGAGACGGGTTTGGGTATAGGTTCGGGGTGGGTACTTATATCCCTGTTACCCATCTCGTACCCGTGTTTTTTAAATCGGAG…
MsMYB040	MSAD_233710.t1	Medtr6g477860.1	At1g18330	At3g58570	PubMedID:27117388	MSAD_296427.t1	Medtr1g054630.1							√				√		√				TGATCAATACCGTTTTCATTCACAAGAAATTATCAATATCGCTAGAACGGTATTTAAATGGGAGAATTTTTTGGAGGTAGTGTAATTTTCCAGGATATACTATTTTTTAGGGGTGTTCGTGGGTGGGTTTGGGTTGGGTTTGACTAAACCCAAAACCAAACTAAAGATGGTGCTTCGATTTGGGTGAGGTAAAATAACCACCGTTATAATATTGGATGGGTTTGGACAAACCCACTAATTTTTGGGTTGGGTTGGATTGGGTAATGGGTTACCTAACTTATTTTTCCATTTTTTTTTAAATATTAAATGACTAAATGACAAGTCCTCATAATTTTGTTTTAAAATAGTACTCTACTTTTCAATTTTCCTAAAAAATGTTTAACTTATTTTACTATAATT…
MsMYB040	MSAD_233710.t1	Medtr6g477860.1	At1g18330	At5g03720	PubMedID:27117388	MSAD_254270.t1	Medtr1g061170.3	√		√	√	√		√	√			√	√			√		ACACAAATAAAAAAGTAATGGAGCAACTAGTTTAATTGGTTTCTTTTGAGCAAGACCAAAATGAAACGATTCTTTAGTATAAAGTTCTTCCTCATCCAAGACCTTGTTGTTTACTGCCAATATAAAAAGTTACCAATGTGGTAAACAATCTGTGTTGATCTTGAACTAGTTTACAGCTTGTCCTCTCCTTTTTTAATCCGAGTCTAAAATACTTTGGTGTTTCGTTACATTTTGGCGATAATGTAAGAACTTTACCTTAAGCTTGGTTATTCTGCAATTGTTTTGACATTGCTTACACATTCAATTGAAAGTGAAGTATGATGAATATATTGGTTGCACTGGCTTTGTACTTGTAAGATGGAATTTGGACTGAATAGTTATGGCATAACACTTGAACTG…
MsMYB040	MSAD_233710.t1	Medtr6g477860.1	At1g18330	At2g36690	PubMedID:27117388	MSAD_284517.t1	Medtr1g062110.1							√	√				√					TTGTAAGGGTCAAACTAGCGACCTCTGATGGAAAAACAAACATCTTTTCCACTGCACCTACTGAGTTCTAGTATACATATTATGCCTAATCTAATATATATATATATATATAGAATATCTGGGAGGGTACCATGGGCTCTCGGGGGTCCCTGGGGAAGATCCGCCCCTGGTCTCGATCTAGCTTGGAATTTGTGGTTTTCTTGTGAATTTGATTTTCTCTCAGCGATAAAATTCATCAAAGAGAGAGTTCCGCATCATCCACATGCTGTGATTGTTGATTACATTAGATCCATGCTGACTAAGAACTTGAACATTGTTCTTGTGCACATCTTACGAGAAAGCGAGAAGGAAACTCTTGCGCTGACTGGCTAATTTGCCAAATTTAGAGCTGCTCTTGAT…
MsMYB040	MSAD_233710.t1	Medtr6g477860.1	At1g18330	At5g02820	PubMedID:27117388	MSAD_274316.t1	Medtr1g067040.1	√						√		√								TAGTTTTCAATAACTATTTTTCAGTTTTTAAAAATTAAAAACTAGAAAACTTGTTTGGATGTATGATTTTGTAAAATTGTTTTTAAAAACTTTTTGCCATTTTGCAGTTTTTAAAAGTAAAAAACCAAAACAGCAAATATGGGTTTTGCTTTTCACTTTTGCTTTTCTCTTTCAACAAAGATTGAAAACAGAAAACACGGAGAAAATGTACAATTTTCATTAATGGCAGTTTGGTAATTAAGTGGAAGTTCTATTATTATTTTTTACCTATTCTTATGTTGACGCTCACAGCCTCACACACCGGGAACCCTATTCTTATATTAATTGAATTGAATTTTTGTCTATTCTTATACTTCATCCGTCCCATATTTAATTGAGCCAAAAATTTATTTCACATAT…
MsMYB040	MSAD_233710.t1	Medtr6g477860.1	At1g18330	At5g02810	PubMedID:27117388	MSAD_274306.t1	Medtr1g067110.4			√	√		√	√	√			√	√			√	√	AAGTATTTACGCGTATATAGGAAATTATGGGTTAGATGAGACCATTTGTTTTATCTTTTGGGTCGTTATGGTTCCAATCGAAGCCTTGATATATGCATGTCAAATTTGAACAATTCTCTAATGCATGATTAAAATTAAATTTTGAATTCAATATAAAACACAAACATCAGTTTCAATACATGGATTCGTACCCGGTTTCAATACATGTACGATAATTATGGGGTACTCTTTTTTCTCATTATTCCTCTACTTGTTAAATTTGTGGCTTTCTTGTATATTAATGTAATGACATATAGTATGTAAAGTACTTTTGTATTTGAGTTTTTATAACAAAACACAGTTTTCATTTTTTAAACTTTTTATTGTGAGTTGAACCATGTAGCTCTCTCTCCCTCCCTC…
MsMYB040	MSAD_233710.t1	Medtr6g477860.1	At1g18330	At1g06730	PubMedID:27117388	MSAD_254883.t1	Medtr1g070375.1	√	√					√				√	√	√		√		GGTGTCATTTAGTTTACACCACCGAATAGAATGCCTCAACTTACACTACACCACTAAAATAACACCTTGTAACAGCTTTTTTATCATAAGATCCAGATCGTTAGAATAAATTTATAATATGTCAATGGCTTATATTGAGGTGGTGTAAGTTGGAACAATGTATTTAGTGGTCCAAACTATACTTTGTCTATTTTGTTAATGTATGTCACAGTGAGGTTCGTTAGATTTTGTAGCTTTGTGTGTTTATGCAAACATGGAGGTTAATCCCTAAAACTAAGTTAATATTATCTTCTAAATTTTGGAGTACCTTGTCTAGGGACGACTCAAGTATAAGGCTACTAAAATATTCGCTTTAAACCTAAAAAAAACATTTTTTATTAGATTTTATAAACAAAAAGA…
MsMYB040	MSAD_233710.t1	Medtr6g477860.1	At1g18330	At1g03160	PubMedID:27117388	MSAD_320273.t1	Medtr1g072270.1		√	√					√				√				√	ATTGAAATGGATAGAGCAAAGAAAGAAGAGGACGTAGTAATATTTTACGTCTCTAAATATAAGATCATTGAGTTTTTTTTTTTTTTTTTGTCTTTTTTATAAAATATCTTTTATTTTAAAGTGCATTAATTGTTTTTTATTAATACTATACTCTTATTTATATTACATATTTTTTTACAATATGTAGTAAAAAATTTATGAAAACATTAACTAATTCTTTATTATAAAGGGTAAACTTATAAAAATAACTTTCTTAATTTTCATGTTTTTTCTCAGAATAATCTTATATTTAAGGAGATGTAGTAATCTTAAGAGTACAAACATCTCCTTAAGTTTACGGTCATGACTCATTTAGCAGCATTTAAATTTTTTCTTAAGTTATAATCTTTAGAGGCCGGC…
MsMYB040	MSAD_233710.t1	Medtr6g477860.1	At1g18330	At1g32860	PubMedID:27117388	MSAD_258180.t1	Medtr1g077990.1		√	√	√		√	√	√			√						TTGTAACTGTAATCAATTACATAAAGTATGAGATTGAAGAAAAGTGTTAGATTCTATTGTCTTTGTTGTATAAGAAGATTGTTGTTGTTGAATTACATCAAGCATATGCAGTCATAGATACCGGACATGTCACGAACATTAATACGTCAATACCGATAATAATATGAGAAAATCACATGTGTTGGTGCGTAGGTGTCTGACACCGAGATGTGTTAGAGATCAGAGATAATATGAGAAAATCACATGTGTTGGTGCGTAGGTGTCAGACTCCGACATTGCAGGGGCGGAGCCACCCCCCAGCTAGCCTGGGCTAGTGCCCAGGCTCAGCTCCAACTTTCTTTGTAGCAAACCCAACCATTACGAGAATTTTTAGCTTTTCCTGCGGATTGTTGTGTAAAT…
MsMYB040	MSAD_233710.t1	Medtr6g477860.1	At1g18330	At5g02270	PubMedID:27117388	MSAD_305160.t1	Medtr1g084720.1			√		√		√	√							√		AAATTAAATAGTCTAAAATTTATACAGAAATGCATATCAATACAACAATAAGAAAATTATCATCCAAAATTCTCATATTTTCTTCTATTAACGAATTTTCTATTCTTAAGTGTATTGACGTTGATTGTCATTCTCCCCGTCCTCCTTGTATATTAAGCAAGATAATTGGATTATGCCCCTCATTATGAGTTAAGTGTGTGTAGCATTAATGATGGGATAACCAAGGATCTCTTCTTTTTAGAGACCACCTTGGTAATTTTTTTTAGGTGCAATAGTCATTAATGATGGAGTAAATAGTCAATTTTCTTTCTGAAATTGTAAGTTTCGTCAATTACCCTCGAAATTAACAAAACTTCAATTACCCTCCTGAAATTGCATAACGTTAATCAATTTACCCCT…
MsMYB040	MSAD_233710.t1	Medtr6g477860.1	At1g18330	At5g04360	PubMedID:27117388	MSAD_272745.t1	Medtr1g090693.1	√	√	√	√			√					√					AATGTTTTTGGCAAAATGCATAACAATTAGGGGTGGAAATAGATGAACTCAGTTAAAGTGACATACTCCTGAGCCTACTTGAGATCCAAACAAAATCAATTTATTTTCTTCCAAAAATAGACAAGGCTAAGTTTTTTGTTTTGAAAAAAAAAAAAAATCTATTTAACTAAGAAGAAAGTCAGAATTCATGCCACAAAAAAAAAGGCTTATAACACCTCTTTTGATTTAAAGTAAATTAAACAAAAATGAGTAAATAAAAAATATTTTTTTTGGAAAAAAAATATTTAAGCTTCTAACACCTCCTTTGATTTAACTTTTAAAGTTTAACATGCAAGATTACAAGTCCATCTCTACACCAATGGTCTCAACTCTTTCCCTCGAGTAGGACGTACATGTCTG…
MsMYB040	MSAD_233710.t1	Medtr6g477860.1	At1g18330	At2g01720	PubMedID:27117388	MSAD_236523.t1	Medtr1g094870.1	√	√					√			√					√		ACCACCCAACACTTTGTACCATATATACAACATCGTCAATCTGACAGTTGTCCGATAGAATTTCACTTCAGCTTGAGCGGTGCCTTTGTATCACATAAAACATAAGAGGCTCTTCTTTATTTTAACCACCCAACTTGGATATGATGGTTCAAATATGCTTTTGTTTCTTTGTAGTTTTGTAATATAGATCCAAGATATTTAAATGATGTAAATTGGGGTATGATATGATCTTCAACTTTCAGTTATAAGGTAGAACTACTTCGCCTTTTGCTGAAATCACATTCCATACACTCTATCTTCCTTCTACTTAAGTGAAAGTCACACCCTTCTAAAACTTGTCTCAAAGTCTTCGACATCGCATTCAATTAATCCATCGACTCTCCAAGCAGGACAACATCA…
MsMYB040	MSAD_233710.t1	Medtr6g477860.1	At1g18330	At4g25500	PubMedID:27117388	MSAD_304364.t1	Medtr1g101520.1				√	√		√	√				√					TTGGCATTGGTCCCTGCACTTTTTTTGTTTGACATTGGTCCCTGCACTTTGTAAAAATATTGGTATTGATCCCTCTGTTAACTTTCTGTTAAAAAAAAAACAAAAAACCAACGGAGTGCCACGTGGCCCAATCATTTCACGCCACGTGGCACTAATATCAATATTTTTACAAAGTGCAGGACCAATACCAATAGTTTTGTGTTTTTTTAATAGAAAGTTAATAGAGGGATCAATACCAATATTTTTACAAAGTGCAGGGACCAATTCCAAATAAAAAAAGTGTAGGGACTAATGCCAAAATCTGATGAAAGTGAAAGGACTAAAGACATATTTAAACCTAAAATAATTATACATACAAATCCTACTAATTAATTAGATTTGTTGATGTATTTATGCAGT…
MsMYB040	MSAD_233710.t1	Medtr6g477860.1	At1g18330	At1g78800	PubMedID:27117388	MSAD_231877.t1	Medtr1g104880.2		√		√			√									√	TATGCTAATGCGTATAATTTTTGTTAGTGTTGTGTAATGCGTATAATTATTTTTATAAAATTTTGATTTTAATTAAAAGTACAAGTGTAGTTGCCTAAAAAAATTATACTTATATATAATTTACACATTTGTATTGTAACAAACTATGCATATCTTTTTCTTATTAAAAAAACTAAACATATCTTTTTCAATGACACCAGCAATGTAACAAATATAATATTATATATATAAATTCTTATCTTTTTGACCAACACTAAAAATATGGTATTCTTATAACAAAATTTGTTATAGAGTATAATTGGAAAAGAAAAAACCAATTATTCTCATTATATATACACACATATACATATTATAGATATGATTGAGCGTGACGAAGAAAGCAATATAAATGAAGAAATC…
MsMYB040	MSAD_233710.t1	Medtr6g477860.1	At1g18330	At4g33920	PubMedID:27117388	MSAD_310175.t1	Medtr1g106855.1			√				√									√	TGGACCAAAGATTTTTTGTTAAAAAATTAAAATTAAATCTGATCTAAAGATCTTTACATATTAATAATTGTTTATCTCATTCTACTTGCTTCTCGCATTCTTTACTAAATTTTGGATTATATATTTTAAAAATGTAAAATACGTTTAAAAATGTTTCATTTTTTTAAATTTTAGAATCGGTAAATAGAACGCACAAAAAGTTTGAAGAATAAATTAAAAAGAAAAATCAACTTTCTTATATATATTTGTGTTCAGACTTAACCCATAGCCTAATATCCACTTTTCTAACATATGTCATACACAAGACCAATTATGATTATCCTATACATTGAACAAACCCAATTGAAACGAGTCACGCGATTCACTCTCTCCGTTTTAAAATGAGTGTCGTTTTAGCCA…
MsMYB040	MSAD_233710.t1	Medtr6g477860.1	At1g18330	At3g09540	PubMedID:27117388	MSAD_277156.t1	Medtr1g115550.1	√		√			√	√								√		GATATATCACGTTGTTTTCTAATTGAGCTTATTCTAAGGATAATGATTTAAATTACGCTGTTGTTCTTGTAATACACTATCATTTTTTTTTAGGGAACACTATCATATTTTATTCATACCCAATTTAGTGCAATATCATATTTATATCCTATTTACATCAAACTCATTATCAAACTCATTATCATTGTTTGTATCTTATTATAAGAGTCAAACTATGGCCTCGTTTGGATAAACAGCTTATATAGATGCTTATAGCATTAGGGCTTATCAAGTATAAATAGCTTATACTTGATAAGCTATTTATGTTTGGATATATACACTAAAAAGTACTTACATAAATTGAAGTGTTTGGATGTGACAATATATAAGCAATTATCGAAATTTTAAATATTTTTAATT…
MsMYB040	MSAD_233710.t1	Medtr6g477860.1	At1g18330	At5g23020	PubMedID:27117388	MSAD_212692.t1	Medtr1g116500.1			√	√	√		√										GCGTACCATGCTTTACAATGCACCAAATTATAAATGAATCTCATCCATTTATTTATTCTCCCGTTTATATATCCTTATGTGTGATTAAGTAGATTCTCCAAACATTGTACAATAATATTATTTTTTTGACAAAAAACATTGACAATAATATTAAATTATTTATTTAACAGTGATATTTAACAACACATCACCGCTATCCAAGTTACGAGAATATCTTATAATTTTACGTAATCTTTTTGTGACGGTGATTGTGTGTATAATATGTGTCATCCTTGTATGGTCGAATTATAATATTCCGTGATAAATTAAACAAGTATGCTTATTTCAAGTTCAATATCTCATATTAACTCATCTTGGTGTGACCACACACTTTAAAATCATACTTAATCAAAGAGCCCA…
MsMYB040	MSAD_233710.t1	Medtr6g477860.1	At1g18330	At2g01070	PubMedID:27117388	MSAD_220584.t1	Medtr2g007740.1	√					√							√				CAATTTTTATTCATAGACGATTTCGCAAAATAAGTTAAAAATCAAGATAAATTAAAGAGTTTTCAACTTGGTAGATTTTGGCACCATTTTTATAATAAAAAAACACAGTAAGTTTGATAAAAAAAATTAAAAATTTCAATTGGGTTGACAATGTCAGTTTGGGTCAAATATGGTCTAACCTAAATATAATCGTTCGTAGACCTAAAGAATTCATAAACCCAAACCCGCACCAGCCACACATCACTTTGAGGTAGAATTGGGACATATGTCTCAACATTTGGTTTGGACTAGGTTGCTATTATGGGTCCGAACCCGCCCCGTGTCCACACCTAGTCTTAAGTAGGCATTAAAAAAAAGTTGAGTTTTTTTCGAATATCTTTCCCTACCTTACTCATCTCT…
MsMYB040	MSAD_233710.t1	Medtr6g477860.1	At1g18330	At1g28330	PubMedID:27117388	MSAD_261322.t1	Medtr2g014240.1			√								√						NNNNNNNNNNNNNNNNNNNNNNNNNNNNNNNNNNNNNNNNNNNNNNNNNNNNNNNNNNNNNNNNNNNNNNNNNNNNNNNNNNNNNNNNNNNNNNNNNNNNNNNNNNNNNNNNNNNNNNNNNNNNNNNNNNNNNNNNNNNNNNNNNNNNNNNNNNNNNNNNNNNNNNNNNNNNNNNNNNNNNNNNNNNNNNNNNNNNNNNNNNNNNNNNNNNNNNNNNNNNNNNNNNNNNNNNNNNNNNNNNNNNNNNNNNNNNNNNNNNNNNNNNNNNNNNNNNNNNNNNNNNNNNNNNNNNNNNNNNNNNNNNNNNNNNNNNNNNNNNNNNNNNNNNNNNNNNNNNNNNNNNNNNNNNNNNNNNNNNNNNNNNNNNNNNNNNNNNNNNNNNNNNNNNNNNNNNNNNNN…
MsMYB040	MSAD_233710.t1	Medtr6g477860.1	At1g18330	At5g18680	PubMedID:27117388	MSAD_228058.t1	Medtr2g020280.1		√		√		√	√	√									CATCGAGTCAAAAATAAATTTCCTGAATTTCATCCCAATTTTGATAACTTTGTCGTTTTGATCTTTAATCAAACAGTTGTTACGCTTAAACAACACTTCGTAGCCTTCCTCCAATGAGTGAGCAACACTTAAAAGACTGAAACATTTCAGAAACGTAATAAACGTTATTCAAAATCAATTTCACACTGAGTGACTTTCAATTTCAACTGTTCCAATACCTTCTATCGGAATGTACACTTTTTTTGAGCTCTTTGAAAAGGTTTCGATCATATAGGTAATATGGATTGTGCAACCACGGTCAACAAACCAAAAATTTGAGGGTACTTTGGCTGCAAAACCCGACATTGCAAGTAGTTGTTTCTTTAGGTCTTCCTGTTGGAGTTTTTTTGTGTGTGAGTT…
MsMYB040	MSAD_233710.t1	Medtr6g477860.1	At1g18330	At1g61800	PubMedID:27117388	MSAD_221520.t1	Medtr2g022700.1	√		√				√				√	√			√		TAATTCTTGGGCGGGGTATCAGCTTTTTTTTGTTATAAAAAAATCATTAAATTGTGATTGCTATTAATTCTTGTATATATTATGACATGGGGTTTAATCTCTGGTTGGGGGTGGAAGCCTAGGGTTTTTAGTGGCTTTTGGGTCCTCCAATAATTGTCAAACCCTAATTCAAAAGTGGTTTAGGTCCCAAAACATTTTTTGCTCTTAGATGACAAATATTGGATTTGGTACGAGTGGGTACAACGTGGTGAGTGAAAATAACATGTCTTAGTTAGATACTCCTGAATGAGGTAACATCTTGGTTAGGCGTTCAGTTTTCTTAAATAAGACACTATACAAATCAACTGATCCTAAGGTTCCATAAACTATTTAAAATAAAAATAATATTTGACACAATCC…
MsMYB040	MSAD_233710.t1	Medtr6g477860.1	At1g18330	At1g51090	PubMedID:27117388	MSAD_304093.t1	Medtr2g026670.1				√			√	√									TCCCTCCAAACTCCCAAATAGAGCCTTATACTTTGTTTGCGAGTTTGGAGGGGAGAATTTAGAAAGAGAAAAAAAAAAAAAAAAAAGGAACAAGAAGAAAATAGAAGACATGGAGAGGGGAGGGTTTTGGGGAGTTTAATTTTCTTCATAATACAAAACTCTCCTCATTTGAGGAACTGAAAAATTATAATGGAGGAGGATTTGGGGGTTTATATGAATTCTTTAAATTTAATCTTTGTTGTTATAATATTTTTAAATTAAAAAATATATTAATCATAAACATTAATTTATCATTCTCTAAAAAATTGCTCATTCGAAAAATGTGAAACATTTATCCATTTTCTCTTATATTTTCCACCCCAAAAACCCTCTCTTCCCCTCCCCTATAAACTCTCAAAC…
MsMYB040	MSAD_233710.t1	Medtr6g477860.1	At1g18330	At5g20630	PubMedID:27117388	MSAD_271365.t1	Medtr2g041550.1			√	√			√	√				√					AGCTTCGATAGATAACTCTCAAAGGTGGTTTTTCAAAAGAAAGAGCGAATAGGGAGCGAGAAAAGCACATCTCATGGTAGACTTTTGAAAGAAAACTAGAAAGCGCAAACTCGATAATGAATATTACTTGAATATTTTCCATTCCCACCATATTGATTTAATTTAAGTAAAAAAGAGTATAAAAAATTGAAATGTTGTTTCCATTGTTCCATAAAGTAGAGCAAAATAATGCAAACTTATTTATGCATTGTGAAATAGGAAAGCTCATTTGTTTTTCTTCACAATTTGGTACTACAAGTTCAACAATTCATGGACATAAACCAATGGTTGCTGTCATGGATGAATTATGGAAACTCCACCGGTTCCGATTATTCTGCACGGCCCTTAGGAACCAAGCCG…
MsMYB040	MSAD_233710.t1	Medtr6g477860.1	At1g18330	At3g14440	PubMedID:27117388	MSAD_274794.t1	Medtr2g070460.1				√	√		√						√			√	GAATTCTAATCAATTCAAATGATTCAATTGAATTGATTTCATTTTTAAATATCCTTGTTTGGATGGAAAAATAAAAAATTTCATTGTCATCATTTTTGGGCAACTTTTATAAATTTTAATGTTTTTGGGCCAAATTTGGAAATTGAAATTATGGGTCAATTTGTAATTTTTAAAAATTTTGAGGGGTCAATTTATAATTTTGAATAAGTTGAGGGGAATATTTGTAATTTCCATAAAAATATTAGGGCTGAAATTGCAATTTTTGTAAATTTATTGGGGTAAATTTGAAAATTGAGGACCTAAATGAAAAATTATAAGAATAAAGAAATTTCAAATTCTTAGTTTTTAGATGTCATTTGAAATTCTTTAAATTTAACTTGAACAAAATACTTCATAAAT…
MsMYB040	MSAD_233710.t1	Medtr6g477860.1	At1g18330	At3g15530	PubMedID:27117388	MSAD_251413.t1	Medtr2g080130.1			√								√			√			CATAGTAAGTTTTTTCCTTTATGATTTTATTTTATTATTACTTCGACTCTCTTCAAATTTTCACCTCCTGTATCAAATTATATTTATTTATTTAAGAAATTTGTGATTTTCGTAAAAGCAATAATAGGGTATCAGGGTCTACAATTTTTTTACTATATAACCAAAAAAATATGTCTTTTAGTGATAGGAAAATCCATCAGCAGAATATATTAATCTGTACAAAATAGACAACATAACCACATCAAATTTTATACATTACACTTACATGTATGAGCAATTGATGTAGCAACAAATATGTATATGATTTATTCTCTTGACAAAAAAATAGATTTATTCAAAAACAATATTAAATGCGACGCCGTTGCTAACTGATAAAAAGCATGTGTAGATACATTGTAT…
MsMYB040	MSAD_233710.t1	Medtr6g477860.1	At1g18330	At2g27810	PubMedID:27117388	MSAD_268793.t1	Medtr2g084895.1				√			√	√	√		√	√				√	CATATCGGAATGCAAATTATGATCGGCGTTTTTCTACTATAATCTCTTGGATCCTAGCAGTGGCGGAGTCAGAAAAAAATATCAGGGTGGACTACTAAAATTAACTATTGAAAAATTGTTTAAAGTCTCACAAATTAGACTTATAATTGAATTATTTAAATTTTTCGGGTGGTCCACTACACCAATTTGCGGAAATTTGGATCAACCGAAACCTAAAACCGACGTAAAATTGTTTAAATCTCACAAAATAGACCTATAATTGAATTATTTAAATTTTCGGGTGGGCCACTACACCACTTTGCAGGAATTTGGATCAACCAAAACATAAAACCGATACAAAATTGCATAAAATCTCGCAAATTAGACCTATAATCGTTGATTTTTTAATTTTTCCGGATG…
MsMYB040	MSAD_233710.t1	Medtr6g477860.1	At1g18330	At3g44460	PubMedID:27117388	MSAD_268741.t1	Medtr2g086340.1				√				√		√			√		√		CTAAATGAAAGTGAAAAGAACCATTACAAGAAATTTAAAAGAATAGTCCACCATAAATAAATGGTAATCAAAAGCAAGATTTTTATGTTTTGCTTCAGCCTACTAAAAGATCGCGCCTTTATGTTGTCAAGCAAGTGATGAATAGTATTTTGTGAATTCTTGAAGATTCTTGCATTTCTTTCATTTCATAAACACACAAACTGAAGAAAACCAAACTAAACGAGTGATGTCTTTCTTGCGTTTAAAAAAGCTTCTGAATGAACCAACCTGAACTAAATGATATGAAATATTAAATGGCGTAACCAAGATAAAGTCTAATCAATCATACACAACAAACCAAATTTGACGGTAAAAATTGCAACGAAGAAATAGATGAGCGGCGTCCTCTAGATTACGACA…
MsMYB040	MSAD_233710.t1	Medtr6g477860.1	At1g18330	At5g18240	PubMedID:27117388	MSAD_268730.t1	Medtr2g086450.1	√		√		√		√	√				√	√	√		√	CTAAATATATAAGTGATAACGTTACTAAAAAATATACAAGCAACCCTAATTGGACAATGAACAATTATATTGGTTTGTCTTAGTAGACTATGATTTGAAAATAAATGCCTACATCCATTAATTATAACACCGAAATTCAATTCCAACTCAAATTCCACATTTTTTATTTTATTAATTAATATTGGTTTTAAAAGAATCATTTGAGTCAATTATTTTTACATACTAATGACACTTTCTATATAACATTCTCTTTAACATTCACTCTTTTATTAAATGAAACTCAGATGAGATATCATCACTTTATATGAGACTAGTTTTCAAAGTGTGACATCCATATAATTTTTAACAAATAAAAAATGAACGTAAGAGAAAATGATAGAAAGAGAATGTCGTAAAAGT…
MsMYB040	MSAD_233710.t1	Medtr6g477860.1	At1g18330	At2g32510	PubMedID:27117388	MSAD_286590.t1	Medtr2g088020.1	√	√	√								√	√			√		GATGGAATCTATCAAAATGAACAGTTTCACGTAGACGTAGGGGACCCAATAGTCTAAAAATTTAAATCCTTGATATACGGGTTGCTTATAATATATGCACTCCACAACGTCCAATGTCATTTCTTGTAAAAAAAAAAAAGTCCAATGTCATTTGTGACTCAGCAAAAGGAAAAAGAATTTCCACATCTCATTTTATTTTCTTCTTAAAATTTAAAACTTTATTAAAACTTAAAAGGTAACATCACTCGTTTGGATCTAGTTCTTATCCAGTTATCTAAAAGTTTCTTTTTCCTTAAAAAAAAAAAGTTTATTTTTTTGTAAAAAGAAGGTTATCCAAAACCAAAAGCAATTAATTATTGAATTAACAAATATGCAAATGAAAAATGTTTTAGTGATGAT…
MsMYB040	MSAD_233710.t1	Medtr6g477860.1	At1g18330	At4g34890	PubMedID:27117388	MSAD_257245.t1	Medtr2g098030.2		√	√		√		√	√				√	√		√		ATTCTTATCTCTTAAACTTCAAGTAATGATGCCTTTAAATAAAGACCATTACGCACACTTTTATTCATTCAGAAAGTTAAGGTAAGGGTAAAAAATTAGAGCTTCAAGGCATAAAGTTTTCTACTGCTTTTGTTAGAGATGGGGGAGTATGTTTTTATATTATTCTGTAATGATGTATGTCACTATGAGCAACCAAACCTCTTTCAATTAGGGTTCTACGTTGAATCTCTATTTATTTGTTGGATTCAATTAATAAAGTTTCTACTTAGTTTATAATTCAATTGCTTGATTTAATTTGTATATGTTTCATTTACAAGGCCGGACCTTGGGGGGGTGCAAACCGCTCAATGGAACTAGACCTCCCCAAGTTATGGGCCTAAAAAAAAAAAAAATTCCCAA…
MsMYB040	MSAD_233710.t1	Medtr6g477860.1	At1g18330	At4g29840	PubMedID:27117388	MSAD_240185.t1	Medtr2g099510.1	√						√	√							√		ATGTCAAGGCAAATGAAGGAAAATTGAGATTAAGAGAAACAAATACCGATAAGGAGTATTGTAGTTTCAACTCCTCCATGTGAAGTTGGAACTGGCCGTCAAAAGTAACATTCATATCAAGTTTATGAGACAAGTTAGATTTAAAGAATTGATATATATGTCAAGGAAAAGAAAGTTACCATCATGAGTGGATCGACCAAGGAAGTCATCAGCCAATAACCAAAAATGATAATTGGGCAACAAAATTTAGTAACACAAGAAAATGACACCAAATTTATCAACCATAAGGATTTGAGGGATTCACAAAACCAGACATAGTCGAATTCTCGCTCGATGAAAGGATAAAACCTCCCCTTGCTAGGATAGGAAGCTCCATCGAAAAACTTGAACGATTAATGA…
MsMYB040	MSAD_233710.t1	Medtr6g477860.1	At1g18330	At3g15810	PubMedID:27117388	MSAD_210081.t1	Medtr2g103850.1	√	√					√	√									ATTCTGATCAGGTACAATCAATTGTATTTTTTAAAATTGATATACATGCATTTTTTCATATAAATATAAACAAAAATATATAAATATATATATTATGTGGGGACGTGGCATGATGGATAGTAAAGTATCTATATCCACAACTGCATCCGTTCATTCTCGTGGATAATTACTCATGTTGGTGTCCGTATTGATAACGTGGATTTCTACTCTATATATCGTGGATATTTTTCTTAATGGGTATTGATATGAATTCAATTCCATCTCTAATCTCATCTCATCTAATCTTATCTATAAATCTTACAATGCGAAAGCTTCTGATTTTCCTGTTCTTTCCTCTTCTAGCGAAATCCGCCCTTCTCCGCATTTGGCGTTGACTTCCTGTGAGTTTTCAGTTTTCTC…
MsMYB040	MSAD_233710.t1	Medtr6g477860.1	At1g18330	At5g49130	PubMedID:27117388	MSAD_326387.t1	Medtr2g435930.1	√		√	√	√		√		√		√				√		ATGACTATAAATATGCATGGCCATGCCGAACTAAGTCAATATAAGATATTGGACTTATTCGTTAAATAGTATATTTCGGAATCAAGATAAATAAACATTGATCTATACAAGGGTGACACTATCTATGCTTTGAGATCAATGAAGATATTGAGACAAAGGAGTAATTATACACATATGTGTTATCATGAAAGGTTTCGTCAGATCACTTGACATTCTTGTCACTTGGGTAGCAATGATGTGTTGCTAGATACCGCTCATTGTTTATGGTATTAGATATTAGATTTAATATCATTGCCAACGTGACTAGAACCTAAAGGGTCACACACAAAGAACAGTCAAAAGATATATATATATATATATATATATATATATATATATATATATATAAGTACGACTTAT…
MsMYB040	MSAD_233710.t1	Medtr6g477860.1	At1g18330	At5g10270	PubMedID:27117388	MSAD_282887.t1	Medtr3g040810.1	√			√			√	√						√		√	GTTATATAAAAACAGATGTTGAATAAGATGTTTTGAACATTAAGCTAACAAAGACAAGTAAAACACAAAGCATAAAAATAAATGGCACAGAGAGTTTGTTAACTCAGTACAATGCAACGTCACCTACTCTGGGGGCTACCAAGCCAGGAAGGAAATCCACTAGTGTAGTCCTTATTCAATAGCTCTCAACAAACTCCTCATTTGCACTAATGACCTAGAACCTACCCGTACTGACTTCAACCTAGGAACTACTAGATCTGAGATCCCATCTCACTACCTTACAACTGATCACAGCCCCTATGATTCTCAAATTACAAATACAATGAAATGAAGTTACCTTCAAACAAAACAACTAAACACCGTACTTCACAGCTTAGGTGCAATTTATAAACTACCTAA…
MsMYB040	MSAD_233710.t1	Medtr6g477860.1	At1g18330	At2g44060	PubMedID:27117388	MSAD_217879.t1	Medtr3g045190.3				√			√	√		√	√						GAAATTCTTAATGGATAAAAAAATATTTTCACCGTATACTCATATCACCGGCATAAAAACAACAGATGAAGTGTCCTCGTAAAAACGATATGTTCATAGAAGTTTTAACGAACACAATAACAGTAACATGTTTCAATTCAAAGGGATTAAGACAACTTTCAATAAAATATAGAAGTCAAGAAGCGTCAATTAACCTAAAAGACGAGGTCGTTTAAATTTATAGGCTTAGATTTTCCTGTATAAACCTCTCTTAAAGTTTTCGTAGATTGTCTTAGGATATATTAAGAGATTTCATCATGCAGAATAGTGTATTATATGTTGAATCAGTCCTAATCCTCTACACAAAAGTAGTAATTTTTATACGAACCCTAAAATAGGTTTTCGTTTTTTGGTGTGATT…
MsMYB040	MSAD_233710.t1	Medtr6g477860.1	At1g18330	At4g22270	PubMedID:27117388	MSAD_258916.t1	Medtr3g054010.1		√					√				√			√		√	ATAAATTGGTTTCAAAATTCATTTCAGAACAAATATTCAAGACTTTCGAGCAATGTTGCCACAGAAACATGTTGAAAATATACCCCGTCATATGAAATAGAGATTGAAGGGATATCATTGAAGAAGGCCTCTCGAGCTCCAGCTACAGTGCCTGAGTAAACACTGAAAGGGAGTTAGATAGAACAGCTGTGGAAGAATAATTTCTATGGTAATAACTGCTGAAACAACTTTAGCAAAAAGAAATATTGAGTAGATTCTAAGTGGGTCATATCAAATTTCAAGGAAATGGAATCATCATCATCTGTTCATAGCTTAGGATGATAATCCTTTGTTATCTGAAATCAATAGAAATTTTTTCAACAGGTGTGCTTGCAAGTTACTCCATTTGCTATGAAATGC…
MsMYB040	MSAD_233710.t1	Medtr6g477860.1	At1g18330	At1g55760	PubMedID:27117388	MSAD_292155.t1	Medtr3g061090.1					√		√	√	√			√					CTCAACTATTGCATCCGAGTCCACATTCAATATGCTGGAGGTAGAGTTATCGATGAATTTCGCTCTATATTAAATGAAGAATATGTTGAAGCTCTCATTTCTGGTGATGATTGGTTCCATCATAAATATGGTGTGAAGAACAAATCAAAGGTTATTCCTTGTCATGCTATTTTACTAATATTTATTCATATATTCATATGGTATTTACTAATGAGTGTCACTATTATCGTATCACTCATTTCTTTTTTTGTTTTCTCATATCAAGCACTTTATGAAATTATATAATTTTCTATTTTTTGGTGAATTATACTCAAATGGTTGTTAAAGATTGATGAGTACTAACGAAAGATTATTATTATTAGCTCCAAATTCATTGTGCTTTGTTGTTATTGGCTTTTA…
MsMYB040	MSAD_233710.t1	Medtr6g477860.1	At1g18330	At1g65690	PubMedID:27117388	MSAD_304239.t1	Medtr3g063310.1		√		√	√		√	√	√		√						ATTTCAGAGGTGTGATAGTGAGCAGACTTTATTCACAAAGAGAAGCAAAGAAGGAAAAATTATCATTGTAAGTGTTTATGTTGATGATTTAATTTTCACTGGAAATTGTGAAATTATGATGTCTGAATTTAAAAGCTCTATGTTAAGAGAGTTTGACATGTCTGACTTGGGGAAGATGAGGTTTTTTCTTGGGATAGAAGTGTTGCAAAAATCTGATGGTATTTATATATGCCAGAGGAAATATGCATCAGAGGTTTTGAAAAGGTTTGGTATGATGGAAAGTAATTCAGTGAGCAGTCCAATAGTTCCCGGATTTAAAGTAAGCAAAGATGGAGATGGAAAGGAGGTTGATGAAACATACTACAAGCAGTTGGTGGGAAGCTTAATGTATCTTACTGC…
MsMYB040	MSAD_233710.t1	Medtr6g477860.1	At1g18330	At1g65960	PubMedID:27117388	MSAD_320781.t1	Medtr3g064740.1	√	√			√		√	√			√						TAATTCAATATATATTTCTTTTTTTTTTTTGTCTAAAAAATATTATTTAATTTGAATAAATAATCACTTTCATCTCTGACTCTGCACCTTGTTGTCACAAAGGTCCATGACTTATGACTAAATATAAAGTAGTTTCTGAATATGCACTTATGTTATCACTTTAGTCCCTGACGTTAAATAATTTTGTTAACTGATGATGTTGTTTTATGCCGACAAAGAGGTGTCACATGGACTAAAGTGAAAGTAGAAAATTATCACTTTGGTCCTTGAACCGAAAATTAATATCCTTGAAAATCAATATCCATGAACCGAAAATAAATATGTCCAAACTCGTCCCAACGAAGTGTTACTCTTCGACAAGAACTGGGTCATTTCCTTAATGAAGTTGTTATGTGGCTG…
MsMYB040	MSAD_233710.t1	Medtr6g477860.1	At1g18330	At5g16570	PubMedID:27117388	MSAD_288925.t1	Medtr3g065250.1	√		√				√	√				√					TCATGAACAAAGCAAATCGGCATCGCTTTATTTCCCCTATTTCTTCAAAACAAATCGCCCTATTTCTTCAACAAAACAAATCGCCCTATTGGAATAAAAGGGTTTTGAAAGATTATAGCAACATTTTTTTTTGTTAATATTACACTTTTCATCCAAATTAGAACTGAACTCTCTTTGTTAAATATTTACCACAAAATGCACCTGAATTTTGCAATCTATATAAACAGGTGGAAGAAACATTTCAACAAACAGTTAAAGGGTATCATTTACGGTAAAGGCCAAATATTCGATAAAAGGAAAATTATTTAAATAAAACATTTTACATGTTGAGGTTAAGAATGAACTATTTTTAGGTACATAATATAACATTAACATATAATTTTTACAAAAGAATGAAGT…
MsMYB040	MSAD_233710.t1	Medtr6g477860.1	At1g18330	At1g70810	PubMedID:27117388	MSAD_278584.t1	Medtr3g067585.1				√			√	√			√						ATAGGCCAGGCCGGCCTATAGGGGCCTATGGCCTGGCCTGTTTAAGCCTGGCCTGGCCTGGCCTGTTTATTAAAAAGGCTAGGCTTAGGCTTTTTAAAAAGCCTATTTAAGTAAATAGGCCAGGCTTAGGCTATCAAAAAAGCCTATGAAGCCTAATAGGCCGGCCTGTTTATGCATGTTAGGCTTTATAGTGGACTTTTTAAATAGGCTTTAAAGCATTATAGTGAAATAGGCTTTTAAGGCCTTATAGTGATAGACAAGTCTTACACTCAAATAGGCTTTGAGGCCTATTAAACCTATTTAAAAGTAGATAAAATGGAATGTTTAGTGAGGCCTATTAAACCTATTTAAAAGTAGGCCTGTAAATAGGCTTTCAGGCCAGGCCAGGCTTTTAAATAG…
MsMYB040	MSAD_233710.t1	Medtr6g477860.1	At1g18330	At2g40080	PubMedID:27117388	MSAD_310398.t1	Medtr3g070490.1			√	√		√	√	√				√				√	GATAAAACTTAAGTCACCGAAATACCCACGCTTCCGGATCTGCAACGTTGACGTCCAAATCATTGGTTGAATTTGTAATTTACTGATGTAGATCTTTCAATAGGAACTGAACAAACACCGCGATAAAACGCGAAATCAAACGCCGCACAAGACGACGAACAACACAACGCTGCACTTAGACGACGAAATCACAAAAAACACAAAAGAAAAAACTTGATAGATGTGAAAACCACTTATTTATATTGAAAGAAAAAGGGAAAAAAGATGTAGAGGGGTGATTCTAGATCAAAAATGACCTAAAACCACCTCTCATCGATGAACGAAGGAGAAAGAAAGTTTAGAGAGAAATTAAAGTCGAATTGTTGAAATATTAATAGACTTTGAATGAAAATGACAATT…
MsMYB040	MSAD_233710.t1	Medtr6g477860.1	At1g18330	At5g62940	PubMedID:27117388	MSAD_249914.t1	Medtr3g077750.1	√		√	√		√	√	√				√					TATAATAATGTCTCCCAAAAAATAGATTTATTTTAGCAAAACATGAATATTTATGTTTTTTACACTTAAATATTTATGTTTTGTTAAAAAGTTCTATTTTTTTAAAGAGCTTATTATAATATTTTACACATTTTTGAACAATTTCGTTCAAAAATAAAAAAGGTAACACATGAGTTTATTTAAAAGTAAAAACAAAAAGCGGTGATCTTGACAAAAAAAAAAAAAAGCAGTGATGAAGTTTTTTTGAAGACTAAAAGTCAAATTTTTCTGGAGAAATTAATTAAAACGAAAAATTAATATATTTACAACAACCAAAACCATATTTAACCTTTTGTTATAATGACTCACTCTTTGATGGAAGCAGAGAGCAATGTTATCCATGACTCTTTGGCGCAACCA…
MsMYB040	MSAD_233710.t1	Medtr6g477860.1	At1g18330	At1g67370	PubMedID:27117388	MSAD_236847.t1	Medtr3g085380.1			√	√	√	√	√				√						AGGATTGATTCAAATCACCATTATTTTGATTCGAATCATCAATTCTAGCGAAAATTGGAATCAAAATGATTCAACTCCTTTTCTCTTTGTAAAGAATGATTCGAATCATGCAAACTAGATATTATAAGATCAAATTTATTAGATTCAGGATTTACCTAGTAAAGTCTGATTCGAATCAAACTATTGAAAAATAAAATTCTGAAGAAAGTTTGTACAGAACTTGTTCCCAAGGTTTTCAACTAAGGTTTTTATGCAAAAATAAGTTTAGAAACATTATAGTGTGCATGTGACCTAGAGTGGGAAAGGGCGTTTTACAAAAACTAAAAGACATGAATCAAAACAATCTAACATAATCTAATCAATCTAAGAAGCAACGGAGCAACTTCACTCATCAACTTA…
MsMYB040	MSAD_233710.t1	Medtr6g477860.1	At1g18330	At1g67810	PubMedID:27117388	MSAD_236877.t1	Medtr3g086590.1		√	√				√	√		√			√	√	√	√	AGATTTTGAATTCGAATCTAACTTTAAAAATTTAACGGTGTTGATTATCTTGTTGAAAGAGAATTTTGATATCCATTTTAATTTCATCCCATTAGAAAGATGAATTCTCTTTAAAAAAAAGTTAGAAAGATTAATTTTGCATGATTCCAACCTAATTTCTTTTTGCAGATATATGTATTAAAAAATACAAACACAAAGTGACAACCGAAATTCATGGTAGGGTGGGTCCATGTGTACAGAAGGATGTACCTTGTTGTCGTCGTTGTTCGATACAACAGTCAACACTGGAAATTTCCCTCTCTTGCAGTTGGAGAAGAAACAAAGCATAAAATCAAATTCATTTATTTTATTGTTTAATTTAATTAATTATCCTAACCCCACCCCATGAAAAAGAAGAAT…
MsMYB040	MSAD_233710.t1	Medtr6g477860.1	At1g18330	At5g53290	PubMedID:27117388	MSAD_244834.t1	Medtr3g090760.1		√	√	√			√									√	TGTCCCTGTACGTACTTAGTTGGAAATTGATCCTCTGCATTTTCTTTCGTATTTTATCAAGTCTCACGCCTTAACCCTTAACCAATCTTTCCCACCTTTTTTAAAATTCTAAAACAATCTTTTATTTGTATTTCAACTGTCTAAATATTTCACATTATTTTCTCATCCTTTTTTTAGCATGGGAGGATCTCGATCATAGTTCACTGTTTTGTTAATGTTAATCGTGTTGGGTGGTTTTGAAACATTTATTTTCTAGATTTCTTCAAGCTTTGAGAGAAGTGAGAATGATTTCATATTATTTTTTGAGCTATTCAAACCTTGATAATTGACATTATTCAAGGACTTGTATATAATTTTTTTATTAGATATAAATAAAATGACAAATGACTATAAAAAATC…
MsMYB040	MSAD_233710.t1	Medtr6g477860.1	At1g18330	At5g53080	PubMedID:27117388	MSAD_244906.t1	Medtr3g091780.1							√	√			√			√	√		TAATATAACCGAAATTGAAAGAAAAAAAATCAGAAAATCTTCTTCAACAGTAATCGGATTCAACATGAAAGAAAAAGTGAGGGATTTGACCTGATTTGGAGATGGAGGATTCAGAAGAAGCAATTAGCTTCGCTGCAGATCTGAGACCGTTGTTCAATGCCATCGTTATCGCAAATTCGATTCGATTCTGTCGCCTTCGAAATTTGTGTTTCTCTTATCAAACAACCCTAGTTTTGCAGAGCTTAACAAAATGTTTCCGAATAAAATAATTGAATATTCGAATTAACGTAAGACTAAGGGGCAAATTAGGATTTTAACGTAAATTTTTTTTATGACCAATTTCCACTTTAAAATTGTAAGGTTTGACAATTTTTTTATCAAGAAATGTTAAAGATTTAT…
MsMYB040	MSAD_233710.t1	Medtr6g477860.1	At1g18330	At5g24470	PubMedID:27117388	MSAD_239087.t1	Medtr3g092780.3		√	√	√	√		√	√		√		√			√		CAAGAGTTTCTTAACATGTGTCTATTTTAGATATCTTAACATGTGTTTTAAAAGGACAAGTTTGTATAAGTTATTAACAAAAGCTTGCACAAAAAGTGGCTAGGGGAGAAATACAAGAGTTTCCACAATCCATGACAAATGAGTGAACACATGAAAAACAAATTACACAAATGAGCCACAAACAAAAACCCAACTCTTAATGAGTGTCATGTCGGTTCCTTATTAATAAATAAAAAATAGAATATTTGTGTGTCATGTATGAAGATGGTTTCCAGGGTGGATTTGGACTTAAAATATTAGTGAGGCACAATTTTTTTTGTTGAATAATTAAATAAAACTAAATTTAATAAGAATAAAAAGTGTTTGTTTATGTTTGTGTTGTGCGTTTGGTGAGAGAAA…
MsMYB040	MSAD_233710.t1	Medtr6g477860.1	At1g18330	At5g64860	PubMedID:27117388	MSAD_303177.t1	Medtr3g094840.1				√			√	√				√					AATTTACTATTGATTTTGAAGAGACATATTCACGTGATGTGAATTCAAGAACTTTTCCATATTTAATTAAGTTTAGTAGTACTTGAAAGATTCAATTTATAAAAAAGATTTGTTTTGTTTTTTTGAAGGATAAAAAAGATTTGTTACAGTGCATTTGTATGGTTCACTTAATATTGATGATTATATGAAACTCCTAGAAAAAATTTAATTTTTGCGAGATGTATAATTTGGACTACCGAGGAGATGAACTAATCCAAATGAATGTCTCTTAATGTACTCAAACAACAATCAATATGTAGGTTGTATAAAATTCTTGGTGAGTATTACAAAATGAGGGATATGTGAATGAAACCCTTTGTCCATTTTTTAGAAAGACTAATGATATTTGTACAACAATTT…
MsMYB040	MSAD_233710.t1	Medtr6g477860.1	At1g18330	At5g64700	PubMedID:27117388	MSAD_303216.t1	Medtr3g095460.1							√	√	√			√					TTTCATTTCTCTTTTTTTTTACTTGCTTTGAATAAAATAGCAATGTTAGTCTAAAATTGGTCTAAAATCTGACTCTTCAAACTCTATGACTCAAAATACCCTGAATATATAAAGGAATCAATCGCAATCAAAGTATCAAACAATATTTGTGAGAATCCAATTGTGTTCGGGCCTTTTGTTGGTTTACTTTTGGAAAAAGAATAGTATAGGTGGTAATTTTGCAGCCAAATAGAACCACATGTCCCTCCTATTATAGATCATTGATTTCCACGTAATAAGGACATGGCTACAACACCAAAATTCTGTACAAAATCATTGTATGAAGCTTTAATTATTTTTTACAGTATATGGGAAACAAGAAACCTAATAATAAAAGGACCTTTAGATGCTTATGTTATG…
MsMYB040	MSAD_233710.t1	Medtr6g477860.1	At1g18330	At5g23575	PubMedID:27117388	MSAD_268224.t1	Medtr3g098210.1		√	√	√	√		√				√						TTTTGCACAATTATTTTTCACCCTCACTTTCAACATTTCCAAATCCATATGAGTTCACCCCACATGTATGTATTTTCTGGAAACGTTTTTTCAACATTTTCAGTCATAATTTTTGTCCCAAAAGCAGTGAAAACTATTCGGTAAATTCATTTTATTATTGTTTAAATTATCGATGCCATGGAACCCATGGTTAAATGCTTAATTCTACATCTGTAAGATTGTAATCAATGACTTATTTTAATTGATTTTGGGCATGAAAGAGAACAATATTACCGGGTATTAGATTTACATAAAAACGCTAATCAAATCAGGAATGCATCAAAACACAGCAAATGAATACTCATGATTAGCCGAGCAAAACAAATTTATGATTAACGAACAGAACTAACAAATTCATGA…
MsMYB040	MSAD_233710.t1	Medtr6g477860.1	At1g18330	At1g27730	PubMedID:27117388	MSAD_222177.t1	Medtr3g102980.1							√	√						√	√		TGTTTTATGACATGCATATAAGTTTTTTTTATAACATTATAAAATGGGTGTAGGAACTCTATGCGTTAATGTTAACCGACATGCCTACAACCAAAGGAGATAGTAAAACCCAAAGTCAAGACAAGCAACATGATGCTGAAGGAGAAGATGGCAACGATGATGAAGACGAAGAAGATGATGACGGAGATGGTGCATTTGGAGAAGGGGAGGATGAATTGTCATCTGAAGATGGAGGTGGATATGGCAACAATTCCAACAATAAGAGCAACTCGAAGAAAGCTCCTGAAGGTGGTGCTGGTGGGGCAGATGAAAATGGAGAAGAGGAAGATGATGAAGATGGTGATGACCAAGATGAGGATGACGATGAGGACGAGGATGATGACGATGAGGAAGAGGGTG…
MsMYB040	MSAD_233710.t1	Medtr6g477860.1	At1g18330	At4g31850	PubMedID:27117388	MSAD_255211.t1	Medtr3g105900.1	√		√				√	√						√	√	√	ATGGACTTTGTTTAGATAAGCTTGTTCAGTTAATCAGATTTCTAATGTTTCATTTGTAGCGTGAATGAAGATTGAAGGTTATCTTGAATACATAGTTTTGAGCAGGGAAAAATCCTATGTTGACCCATAGGAATCTTGGTTTATAGTTAAGATTGGATGGAGTACATCTCTTCTATTTTTAAATAAAAGCCGAAAGTCTTGTGTCATTTTTAAATAAAATTGTAGCCACAAATTCACCATGCATTTAATTTGATTTTGTTTTTGACACTTGTGTTTAATTTAATTTAATTTATATATTTAAATTTGTCTTATGAGACCACATTTTTTTGGTCGTACAAGGTAAGAGTGAGTGCATTGAGAAAAAGTGATAAAATGACATGTAATCAGTACAAAATCCAA…
MsMYB040	MSAD_233710.t1	Medtr6g477860.1	At1g18330	At1g09890	PubMedID:27117388	MSAD_235279.t1	Medtr3g111410.1			√				√				√	√					TTTGAAACGTGAGGGCAACACACACACGCACGCACGCGCGCGCACACATATATATTATTTCATTTTTGAAATCATAAATATACATCATAATTGTCCCCAACGATTCTCCATATTCTGAAAATATTGAATGATTTTTTCATTTTCAATACCAACAAAAATCTCTCTCTCTCTATATATATAAGCAACTAAACAATTGTTTAACCATCCATCTCCAATGCGATTTCGCATTCAATTCTTGACAAAGTTGTGATGTCGTGTCAAGGTGTGTGTATGTGTGGACCAAGAGAAAAGTGTTGTGTGGTTTGTATGGGCTATTTGATCAACATTTCAACTATTACTAAGTGTGTGTTTGGTTGTGCGGTGGACAAAATTGATTTTGATAGAACTGATTCTATAGAA…
MsMYB040	MSAD_233710.t1	Medtr6g477860.1	At1g18330	At1g75430	PubMedID:27117388	MSAD_235201.t1	Medtr3g112290.1	√			√				√									TTAGATAGAGTGCAATATCATTTTAAATTTTGAGCCGAGTCTAATTCAATAATTTTAACATCAATTTGTAAGTTGATGATTTTCCTCATTTATAAACACATATGTTTAATCCATATTTAATCAACGTAAGATACTGTAACCATATGTGCAAGCAATAAAAGATTACAATTTTTGTAAACTAGCCATTGAGCTAGTTTGTACTGTCTCGCTTTCTCAACGTGTTAAACGAGACGAGAAAACTTGAAAGTTTTATGTTGAAAATCTCTACTGATCTTACCTAAAACGACGGGTTAAACGAGACGGACCGGCAAGGTCGGCTCGTTTTAACACCCCTAATCAAAACAAAATCCAAATTAGTAGTTGTTGTCCCTTAATTTTATGAATCTTTTTATAAATTAA…
MsMYB040	MSAD_233710.t1	Medtr6g477860.1	At1g18330	At1g19740	PubMedID:27117388	MSAD_275204.t1	Medtr3g112420.1	√		√	√				√			√				√		AACCAAATCCGAAATTACTACATAATCAAATTGATAACCAAAATAAAGCGAAATTATAGTCACAAATATCTAGCACCCAACAAAACCACACCACTACCGTTTGTCAAGAAAATATACCACAATTTAGTATCATAAATGAAAGAAGTTAAATCGGTCAACGCTTATAAATTTGAGTATCAAAATAATAGTTTATTCGATTTTAATTTTTAAGAATATCAAATGATATACCTAAAAGTTGTATATACACTAATTTGTGATTAATCTAAGTGAAACTTAATTTGTACATACAGTAATTTGTGATTAGTCTAAGTGAAACTTAATTTCATAAACAATATGAGTACTGTGGATTAAGAAAATATAGTTAAAACATGAAAATATACTAAAGGTCTAGCAAATTAG…
MsMYB040	MSAD_233710.t1	Medtr6g477860.1	At1g18330	At1g75370	PubMedID:27117388	MSAD_211435.t1	Medtr3g117100.1		√	√		√	√	√	√			√						GAAAGCCTTACCACATAACAAATGGAAGGATCTTGTAAAAATAAAATAAAAATGAAAGGAAACAAATTAATATGAAAAAGTATATTTTCACCCTTCTTCATCGTTTCAAACACCAAACACCAATAATCCCTCTCTACAATGGAATTAAGTAATATATTGAAATTTTTCTGAATTTGCTTGAACTGAGTTTCATAACACAAATATCAGTGAAAGTTCAATTGGGTGTTTGAAATACAATCAATGTTTCGATCTGTTCTTCCATGTTTAACGGCCTCACAAACGATCCTTGTACATCAATTCTAGTTTCCGAACCGATCTCCTTTTCTCCATCAATCGCCTCAGAGCATGAATCCGACTTTGTTTTAAACATCTATGATTCATGTTGGTACAACGAATTCA…
MsMYB040	MSAD_233710.t1	Medtr6g477860.1	At1g18330	At4g35300	PubMedID:27117388	MSAD_211544.t1	Medtr3g118530.1					√		√	√			√						CCTAATAACAATACTACACTAAATCTTTAACTAAGAGTTCATAATTCTTACATTATCTTAAATACGTCTCATTGTGGTTATAATTCAAAATTAAAAAAACCAATATATATTCATAATATGTATCTAGTGCCAAACGAGGATTAAAATATCTCCATTTTAAGTCTGTTAAATATTAAAACATCTTTTAACTCAATTGCTTTGAGCATTTATTCTAGGGATTATATTAAAACTTATGCCCTAGGTATTAAAACTTGTTGCAATATGTATCTAGACCAATGCTCTATTCATGAGACAAGGTTAAAGAGTTTGTAATCTTTTGGGCATGAAAATATTGAGGTACATGAAGACCCCTAAACAAGACTATCACAAGATGTTTTCATTATACTACGAGGAAAATGC…
MsMYB040	MSAD_233710.t1	Medtr6g477860.1	At1g18330	At2g29970	PubMedID:27117388	MSAD_311822.t1	Medtr3g464150.1	√						√		√		√				√	√	ATAAATAATTACTCTTTATAAAATGATTGAGAGAATCCTAATTACTTGCAGAGGAAGTAGAAAACAGACCCTAAGTACCAAAATAAAGAAAGACTAAAAACATTTCACCCAAAAAGAAATGTTTGCCGTTTCTCATGGGATTTCATCTCAATTCATACAAGCCAGTTAGGTTCCAACTCATGCAAATTGATCACCAAATCACCAAAATAAGAAGCATATTAAAACTCATTCCATATAAAGGGTTTCTTGATAAATGTATAGTCATGATCCTTATCATATGATGCTGATGTTGATGAAATAGTGACTTGCCATGAGCCTAAAATTAAAAACCCACTCAATGAGTCACATGCTAAGATTTTTCTAAAAAAAAAAAAAACTAAATAAAATATGAGTATCTTA…
MsMYB040	MSAD_233710.t1	Medtr6g477860.1	At1g18330	At5g58600	PubMedID:27117388	MSAD_233182.t1	Medtr3g464570.1			√	√			√	√			√	√					TGTTGGAGGTGAACCAAAACAAAAAATGAGAAATTATATTTGTACAATTATTTTGGTACAACTTTTTCTTTCATATTCATATATTATGTTTTTATTCTCTCTCTACCTTTCTCTCTCTCTCTCTCTCTCTATTGTTTTTGACCAATGAAAAAAGAGAACAACAAAGTTGTCTCAAAGGTTGTACCAAAATAGTTGTCAAAATATCACTACTCAATAAAAATCAATATCTTAGTGCTTTCTAAAGTTCTAGCAATAATTTTCTCAAGTTTTAGAAACAAACTATTTTCTTATTCACGTGTCCAATACTCTCACCTTTTGTTGGGCATTCCTCCTCCACCAATCATTAATAACATTGTTAATTTCGACCCTGCCTAAATTTCGATGATGTTGCTATGTAAA…
MsMYB040	MSAD_233710.t1	Medtr6g477860.1	At1g18330	At5g50920	PubMedID:27117388	MSAD_272081.t1	Medtr3g498725.2							√	√			√				√		AGGAAAAAAAAATCAAGGATCATGACTCTCTTAGAATTTTTTTTGGAGATATTTTTAAATTTTTATGATTTTATTTGACATGTTTTTATCATTTTTTTACTTTGTTTTTTGTTGTTTTTAAAAGTAAAATTCAAAACTGCTGCAATGGAAGAGATTATGATTGTTTATTTCAGATTTTATAAGCCGAAAATCCGAGGACATTTTTGAAAATTCTACATGATGCATGAGAATGTCATAGGATAGGATGAAAAAATCAATAGTCTTTTTATTCTTAACAATAGAGGGTTAGAGGCCCAAACAAGTTTTATATTCCTTCTTTTTTTTCTTCTTTTGAAGGAGATATACTCTTTAGGGTATGTTTGGTCATGTATTTTGACAAAAGTTGATTTTGAAAATTGA…
MsMYB040	MSAD_233710.t1	Medtr6g477860.1	At1g18330	At3g12980	PubMedID:27117388	MSAD_264988.t1	Medtr4g005050.1	√	√	√	√			√	√			√		√				GTAACACAATTGTTGTAGTTGGGAGGTTTCAAACGTCCAACTCCAACGTTGTTTTCCTCTGAATGGGGCAATTCAAACTTGTTAAACGGCAGAAATCCAGCATGCGATGTGCATCTTGAACAATGGTATTCAAGTGTCAAGGAATGCTCCTCATTCTTTTGACACTTGAATACCGTCATTCAAGATGCTCATCGGATGCTGGAGTTATGCTGTTTAACAAGTTTGAATTTGTCTCATTCAGTGGTAAGATGATTGTTGCAGTTGGAAGGTACATTCCGGAATGTAATGTAATGCAATGTAATGTGATAACATATATTTTGTTTTGAATGGAACAATAATTATCTTATTTATTCACTTTTCGAATTTATTTATTCATTACGCAATTTTAATTAGTTGAAT…
MsMYB040	MSAD_233710.t1	Medtr6g477860.1	At1g18330	At2g38250	PubMedID:27117388	MSAD_217340.t1	Medtr4g015680.1	√		√	√			√	√				√			√		AAACGTTAGAGTTTCTTCATTTTCTTCTGAAATTTTTCTGGGATTGTTGTTGTTAAAGGTTGATGGAGATGATATGAAGATGAAGAAGAGAGGGAGAAGATACCAAAATAAATCAAATTTTAATTAAGGGACCAAAGCGATACTAATTAAATAGTTAACAGACCAAAAATGTAATTTAGCCTAATCAAAATTTAAGGCTTCATTTTTTTTGTTCTCACTTTCTAGGTTTTTTATAGAAAGGAAACACGTTCCATCCCAATTAAGATAATTTAAAAATAAGGTGAATAAATGAAACAGAAATGATAAGTAGACACAAACTTTCAAACACAATAAAGACAGCATGGGTAATTTGGATATTTCACCCTTTAAACAGGGGCAATTTTGTAAATACACCACAAC…
MsMYB040	MSAD_233710.t1	Medtr6g477860.1	At1g18330	At3g09210	PubMedID:27117388	MSAD_261670.t1	Medtr4g019060.1	√		√	√			√	√			√	√	√	√			AAAATATATTTTTATTAAAAATGAAACAAATCCAGAAATATGATGAAGATATTCATCATCTTCATCTTCTTCCTTTGAATCTTCATCATCTTCATTGAATCAAAAAAAATTCTACACAAATATATCTCCAAATATCATGAATTAATGTTATATTCACCTCAAATCTTCTTTTAAACACAAAAATCAAACCCCTATAGAGAAAGGGATTTAGTTGCATTACCAAAAAAAAAAATTAATTATATAAATTGTCACGTTGTATATTATTATTATTATTTTCTAACTCAATATTCAAGCCCGACATAAAAATAATCCCAAAATTGATAGCAGCTTTGCACATCAATTTTGTTGTTTTCAGAACAATCTTAACTTTCGTAAAGCTCAACCCTTCCGCCAGTGACT…
MsMYB040	MSAD_233710.t1	Medtr6g477860.1	At1g18330	At4g12410	PubMedID:27117388	MSAD_316778.t1	Medtr4g025830.1	√			√		√	√	√				√				√	CATGCTATATGTGATTGTGTCTATTTCTCTGTTGTTTTAGTTTTACTTTTACCAACCTAAATAACTCATACCTCATGCTTTAAACGCATGCGTACGTAACAATCAAACAATTACCAGTAATTATAATAATCAAGCGTCTTTAAGTTTTTCTATAAAAATTTACTCATCATAATGACACGAGTTAATTATGTGAATTTTCTTTACATCGCCGAGAAAAAACAACTTACATACTCCATCCGTCCTAAATTGTATGTCGTTTTGGAAAAAAAATTTGTCCTAAATTATATGTCGTTTTACAATACCAATGAAATATTAATGTTATTTTTCCTATTATATCCTTAACTATTAATTACTCTCTCTTCTTTCAATTATTTAATTTATCTTTTCCATACCATTTAT…
MsMYB040	MSAD_233710.t1	Medtr6g477860.1	At1g18330	At4g31500	PubMedID:27117388	MSAD_316759.t1	Medtr4g026050.1			√	√			√	√									TACTCAATATTTATTTATTTATTTATGTAGTTAGATCAATACATTGTATTGTTTATGTTGTAGACTTTTACTATGATTAATTGAGTTACTTGTGTGGAGTTTGTTATGAGCATAATTTTAAAAACCGGCTCAGTAATCGACTCGATAAGGCCATTGGGCCATTGAGTTACTGGTCGAACTGCATGACTAAACCATATTAGATCGATTAACTCGGTCATATAATTTGGTCTCTAAAAATTATCGTTCTTATAGTAACCCGACCTCTAAAAATTATTTTTCTTATAATTAATTGAGTTAAATCAAAATAACTACTCCCTCCGTTTCAAAATGAGTGTCGTTTAAAGTTGTTCCACACATATTAAGAAATGCAATAGTGTTGTCTATAAACATGACACTTTT…
MsMYB040	MSAD_233710.t1	Medtr6g477860.1	At1g18330	At1g33970	PubMedID:27117388	MSAD_223168.t1	Medtr4g032300.1	√		√			√	√	√									TTCACACTCATTTAAAGCAAAAATTATCGGTCAATATTGGATTAGACATGTATATGTGATTTGAGTTTGCTTTCCAAGTCTTCCTTCCATCACCCTTTTAATATGAAACTTTATGTTCCACTCTCACATGGGGTTACCAGTTAGTACCTACCACTAATAAGCGTCTTTAGATAGTAGTTTACCGCTAATAAGAGTCTTTGTGTCAAGCTAATTAAAATCCACTTAAAATATTTAAAACTAAGCCTAAGTGTGACTTGTGCATTGATACCTCACTTTCTCTTCTAAATTATAACTTTTAACTAGTATGGACATATGTGCTAAACACGGGTTAACGGTAACGGGTTAGATACTCATCTAATTATTTTACCAAATGTCAAGCCATTTATATAGTCCAGTGAC…
MsMYB040	MSAD_233710.t1	Medtr6g477860.1	At1g18330	At3g20230	PubMedID:27117388	MSAD_224249.t1	Medtr4g032660.1	√	√	√				√			√		√	√				TAACATCCTTTGGTTCAAGACACAATTATTCAAACTGAAATTCCTGTAAGTAATCATAATTAAATTATTGTATTAGTTTTTTAGTCATCCCCAGGTGTTGACCGCACGGGTGAGGGAACTAACAGGGTAGGGATCTTTAAAAACCCCAGAGAACCCGAACCGGAACAAAAAAAAATCAAACTGCAGATCTTTAAAAATCGTCCACGTACAACTGCGGAAACTAATCTCTAAAAGTAACTTAAGATCTATTTAAGGGCTTAATCTTTCGCAACAAATGTTTTTACACATTCACTAATAAAGAGTCAAACTTTGGCCCAAATGATCAAGAGGTCGAAGTATCTACCACTTATATCCGACTTAGGTTTATTTCAGTTTCCTTTGATTTTAAAGTGGTCTCAA…
MsMYB040	MSAD_233710.t1	Medtr6g477860.1	At1g18330	At4g26730	PubMedID:27117388	MSAD_267123.t1	Medtr4g046723.1			√			√						√		√			TCTTTCTTCTCCTTCAGATCTAGCTTTAATTTTGAATTATAACTTTTATTATTTTCTGTATGCCCCATTTAATTTTTAACAAGAGGGGAATTTTGAAGATAGAGAGCACCACTCACTTATGACCCATGGGTTTGCAACTTTTAAAGAGGTGGAAGAATAATCCTTCATGTTGACGAGAGTGAATAAAGAAAAGATGTGGTTTGTTTGATTTGTGTTGTAGAGATGACATGGCAAAGTGAAGAATCTTGGCTTAATTGGCCTATGCAATTTCGTATGTTAATACTCCCTTCAAGAGATGAAGAAATCCGCAGGAAATTCTTCAACGAATTTTCTAATTTACAACTTCTACTGCCGGATTACCTATCTTTAATTTGCCGGAAATTTAATGGATTTCACCAT…
MsMYB040	MSAD_233710.t1	Medtr6g477860.1	At1g18330	At2g27820	PubMedID:27117388	MSAD_283733.t1	Medtr4g055310.1			√	√			√		√		√					√	ATTTTTTTTTTTTTTGAGCAAGTTTTTTTCAAAAAACTTAATTAAATCTTCGAAAATCATAATTAAATTTTTTGAAAACAAGTTTATTTCAAAAAGTTTATTTATATTTTTTAAAATTTTGGAAAATTAATTTCCATATTTTTAAATTAATTTTTTATTTTTATATGTTTATTTTAATTTCGAAATATATTTTTTGTTTTTAAAAAATGGTTTTAAAATAATAAAATTACAAAATCTAGTGATGAGGGAGTATGGTAAGGATGTGTTCTTGGTTTGATCTAATGGTTAAAAACTAACTTTCCCATGGTGGGAAAAATTAGCCTTTCCCATGCTAAACTTCACCTTCAATCTATCCTTACCTACTTTATGAGTTTTTCACTCTCCCTCTATCTTTTTGTG…
MsMYB040	MSAD_233710.t1	Medtr6g477860.1	At1g18330	At2g28660	PubMedID:27117388	MSAD_273764.t1	Medtr4g062450.1		√			√	√	√	√	√	√		√					AAAAAGGTATTTGTCCCCTCTTTTTTGCTAACATGGTATGGCGTGGCAGTTGCTGACTGTGCAACTTTTGCCACGTGGCAGTCCATGTCATTAAAAATTATGATTTAAATTCTGAAATTTATTTTTTAAAATTAAAAAAACTGAAAAAAAAATCATAAAAAATTCCAATATTTTTTTAAATATGAAGAAAAAAATTGGAAATTACTTTTTTTTTTACATGTGGAAATAAATGATTAAAAATTAAAATTAAAAATTATATAATCTCAAAATTTATAACTTTTGAAAATATAATTTTCAGTATTTTCGAAAGAAAAAAAAGTAATATATAATATTCAAATTAAAAAAAGAATTATTTTTCGAAAATTTAATTTTCACCTTTTTTTTTCAAAAATTTTACTT…
MsMYB040	MSAD_233710.t1	Medtr6g477860.1	At1g18330	At2g28690	PubMedID:27117388	MSAD_317143.t1	Medtr4g063070.1			√				√			√	√	√					TAAACAGTTTAATTATGTGCTTATATCGTAAACACTTATGTATAATCCATTTCTACTACAAAAGATAAAATAAATTCGAACTGTTTTCACATAAGTTATAAGTTAAGCTATCTTCAAAAGCTTATGGAAATAAGATGAAAACAACTTATGAACATGTCATAAGTTGTTTACATAAATTCTTCTAAATAATATCACAAGTGCTTATGATAGTAAGTAAACTTAAATAGTCTATAATCCAAACAGACTCTTAAACAAATGCATATATTGTGAAACTTACATAGAGCTAATAGAAATAATTTGTGAAATGACCATAAGAACACAATGCATTTCCAATATTAGTTCTGTCTTATGGTTATGGCCTAAGCTATTTTTAATAAGCTATGTGAAACACTTGAAGAT…
MsMYB040	MSAD_233710.t1	Medtr6g477860.1	At1g18330	At1g19400	PubMedID:27117388	MSAD_319771.t1	Medtr4g070020.2					√	√	√				√						TATTATCAACCTTTAGGTCATTGGTTCAAGGCATGATAACTTGAAGAGAAAAAAAAATTAAAAGCATATTTAAATAAAGAAATCAGACATCAACCCATAAAATATTTTTAGACTTACTAGGCTGGTCAAAATCTTGGTTAAGAAATCTTTAACAAGAAAATTTATTATTTTTGTATTTTGCATGGACCGAACTCAAACTCAGGACAAAAGGTTGTCCCATGATTCAATAAGGGACAAAAAAGTCTTGTTTTTTATGGTCCTTCCTACATGTTTTGTTTAATCTCATGATCAATTTTTAAAACAAAATGAGTAAAAAATAAAAGTTGATCAACCTAATTTCATGCTTGTTAGCAAATTATAAGCGCAACCTAAATTGTGAAATACATGGAGGAGGTTGAG…
MsMYB040	MSAD_233710.t1	Medtr6g477860.1	At1g18330	At4g39260	PubMedID:27117388	MSAD_251397.t1	Medtr4g070080.2	√						√	√				√					ACAAGGCAAATTTGGTACTAAGTGGTTGTTTTCCCAAACATATCTATCACCCACTTCCAACAACCATAAAATAAAATTATTACCATAATCTAATCTAATCTAATGTAAGGACTTATAGTCACTCACATATGGTCGTGAAGGTCCCACGGGTTCGTTTTTCAGTCTACCTCTATCTAATCAAAGTTTGTTGGGAACAAAATCATCCACTACAATCCAACTTTTGATTAATCAAAACAGTTAGGAGTATCATACTTTTCATTCATCATGTGTTGGAAAAAGGACCTCCTTTGCTAACATCTATGGAAAACGATGCATTAGTCCATCTGTATGTGCATATCCTCCAATGGATACACTTCCAAATTGCGGTAACATCGGTATTGGACTTTATAGTGACAAGAA…
MsMYB040	MSAD_233710.t1	Medtr6g477860.1	At1g18330	At4g38900	PubMedID:27117388	MSAD_263571.t1	Medtr4g072090.1							√	√	√								NNNNNNNNNNNNNNNNNNNNNNNNNNNNNNNNNNNNNNNNNNNNNNNNNNNNNNNNNNNNNNNNNNNNNNNNNNNNNNNNNNNNNNNNNNNNNNNNNNNNNNNNNNNNNNNNNNNNNNNNNNNNNNNNNNNNNNNNNNNNNNNNNNNNNNNNNNNNNNNNNNNNNNNNNNNNNNNNNNNNNNNNNNNNNNNNNNNNNNNNNNNNNNNNNNNNNNNNNNNNNNNNNNNNNNNNNNNNNNNNNNNNNNNNNNNNNNNNNNNNNNNNNNNNNNNNNNNNNNNNNNNNNNNNNNNNNNNNNNNNNNNNNNNNNNNNNNNNNNNNNNNNNNNNNNNNNNNNNNNNNNNNNNNNNNNNNNNNNNNNNNNNNNNNNNNNNNNNNNNNNNNNNNNNNNNNNNNNNNN…
MsMYB040	MSAD_233710.t1	Medtr6g477860.1	At1g18330	At1g70820	PubMedID:27117388	MSAD_307451.t1	Medtr4g084270.1	√		√				√									√	AATAAATGCGTCAAACTTAACAATATCAACATTGTTAGCTAAATTAAGTATTCCAGACTATTTATATCTTACCTATATATAAAAGAGATGTATGATTTTGGTCAGACTTTTTATCTTTCAACTATTCCTATCATTTAAACTATTCTAATTACAATTTTACATCTTTAATTAAAAAAATTAGTTAAATCGAAACAATTCTACTTCTATATATATGATCAATTTAAAATAAATCAATTCATTCACAATCATATTATATTAATTACAACCTTATCTTTGTATAATATCATTTAAATTTTTAATTAAATTACACGTTTATATCCCATTATAACATGACCAGTTACACAATAACAAAAATATTATATTTAAAATTTAATTTAATTGTGATATATAATCCAATTT…
MsMYB040	MSAD_233710.t1	Medtr6g477860.1	At1g18330	At1g49780	PubMedID:27117388	MSAD_234953.t1	Medtr4g085720.1				√	√		√	√			√						TGTAGAAATTTAATAATTATAATAGATTTGATGAAGAGAATACTAAACTTTTACGATGGTGTTTATATTTGAGTCTAACATCATTATTTACAGTCTTTTATCTGAATAAATTTCAGTCACGCTAAAAAAATTCTTGGATCCGCCCCTATACATATCACATGATGAGTCATCTTGATTTTTTGACAAAATACTCTATCATCTTTTGTATCTCTGTTCTCTTCCTCTTTTGGTTTATTTTCTAATTTCTTAATAGAGACGTGTTCAGGTACTAACTCTTTTTTGAATAAACAAATTATAGTGATTACTATTATTAGATTCAATGTTAATTATTAATTCCATTGACTTTTTATGAAATTCATTGACTTTGATACTCTGTCACAGTCATGTGATTAGTTGACT…
MsMYB040	MSAD_233710.t1	Medtr6g477860.1	At1g18330	At3g19290	PubMedID:27117388	MSAD_276806.t1	Medtr4g085910.1				√			√	√			√						TGGAGCAGCATTTGCAAGACAGTTCGAGGCTAATAACCCCGTGCTGGATATGATTGACAAAAAAATTCTCCAACGTGGTGGTCGCAACCGAGCTGCACCAGGGGCATGGTGCTCCGGTCGGAGGAGCTGGTGGGTGGATCCGTGCTCACAGTGGGGTGATGTCAATATTCTTAAGCCAGGTCCTCAGGCTAAGAAGCTTGAGGCATCTGTTTCTAGCCTTCTTGATGACTGGACCGCACAGACAAATCAGTGCCAGTGATCACAGCATAGACACTAAGAATAGAAACCATTGTAGGAAGCTGCGCAGTCTATCTATTGCACTGACCAGTAGAATTTGCCATTTATTTTGAAAGAAAAACACATTCTTTGGTCACCAAAGTGTAATATCAATCATGAGAG…
MsMYB040	MSAD_233710.t1	Medtr6g477860.1	At1g18330	At2g15890	PubMedID:27117388	MSAD_320192.t1	Medtr4g087160.1			√				√	√				√					TATTTACTGTAGAAAAAAAAAAATCATATTTTACTAAAAATCGCCGGGTTCATCAATACAATTTTTTAAAAAAACTTTCATATCAAGGAAACCTTATTTGTGGGACATTTTAGCAATGAAATCATAAAATAGAGTAAAATTAATCAAGAGCCCATTTGTTTTGGATTTTTTTTTTTTTTGAAAAAAAAATATATTTTTAATCACTTTTATTATTTGAATATTGTTTGTTTCCGATTTTTAAAAAATTAATTTTGTTAAAAAAAAATCATTTTTATCCTAAAATAGAGCAGCTAATTTTATCCTCATAAATGGAAGACAATCAAACAATCACCTTATATATGTTTTCTTTTTTGTCATATTTGAGACTAGAGTAAATATAAATTAGGTCTTGGCCCACTT…
MsMYB040	MSAD_233710.t1	Medtr6g477860.1	At1g18330	At1g28310	PubMedID:27117388	MSAD_295385.t1	Medtr4g088580.1							√	√	√	√	√			√		√	TTCGATCCAAATTCCAAATTAAACTTCCTAAACTAAAATTCTTATAAATTTAATCACTTTCCTTTCTTATGTGCTAAGTCTTCAATTCAAAGTTCTCTGTTCTCTCTCTCTCTCACACTCAAACTCCAACAACAACACTCACTGCCACCTCATCATCGCCGCCATGAACGGCGGTGGTGGAAGTAACTTCCCTCCGCCACAACCTAACGGCGGCGATTTTCTTCTCTCTCTTCTTCAAAAACCCCGCCCTAATCCTCACCCTTCTCAATCCTCAACTACTCAACAATCTCCCATCATCGATCCCGCCGTTGCCATGATGGGTCCCACTATTCCAACCAACGGTCACGATCATCCCAATCATCACCCTCATCACAACCACCACCAGCATCATCAGCATCT…
MsMYB040	MSAD_233710.t1	Medtr6g477860.1	At1g18330	At5g63990	PubMedID:27117388	MSAD_301762.t1	Medtr4g094672.1		√		√	√			√				√	√				TATAACTTAAAACTAGGATTATTTTTCATGATATTATAATTCTGCATGCGTGTCTGAGTTTCATTATGTACTCTGCACAATTATCAGTTGTAGGAACCCTTTCAACTTGTCTGACTTGCTCTTTCATCTACTGTTATCAGTTTTGCATATAAAATCTTGAGGAGGTTTTTGCCTGAATAGAAGGTTGAGGCTGTGAAAGGTCTTACTATCACTGCAGATGGAAATGGTGTTGTTTTTGATGTAGCAGCCGAAGATTTAGATACATATCTTGCTGGTAGAGAATTTCGCTTGAATCATCACTTGTAAAGAGTATAGTTGGACATTTTGTTTTTATTTTATTTATATTTTTAACTCTATCATATTTGTTCTTCAGGTAAGGAAGATGCTTCATATGTAAGA…
MsMYB040	MSAD_233710.t1	Medtr6g477860.1	At1g18330	At5g45120	PubMedID:27117388	MSAD_249779.t1	Medtr4g100990.1			√				√	√							√		TTTTTTTTACGGGGGTAAACCATATTTCGCCTATATGGTAGGGGGTAAAAATATATTAACCCTATTTAGATTAGGTTACTAGCGTTATGTGTACTACATGTCCATCTTTCAGTTTATTTTTATTACTGTGCTAACGCGTGTAGATTATCAACGATATTTTATAGAAATTTTGTTTATAAAATACAAATGATATTTTATATAAATTAAAATTATAAGTATAGGTATTTGTGATTTTCAAATGTAACAAACTTAACAAATCAATTTATATTTTTCAAATGAACCCCGGACCTTGCATATATTATGCATTGTCCCTGCCAATTAAGTTAGGCTCACGAGGACAATGAAAACAATAATATAACAAATATAACAAAAATTCTTATCTATCTTAATAACACCAAC…
MsMYB040	MSAD_233710.t1	Medtr6g477860.1	At1g18330	At3g48360	PubMedID:27117388	MSAD_235558.t1	Medtr4g104140.1				√					√			√			√		TGAACACAAGTTCGAATTTGTAATTTTTTATTTCTTAATGCTTGATATCACAAAAACTTTCATCCCGAATGCTTCGCGACTGCACAAAACAAGCTGCCTTTTTTTTTCTTCCACCAAATCCAGAATTTAGGTGATTGAGCAGTTTAGGCACGTTTTCTTAAAGTAAAAATACGGTTCGTGGAATTCTCGGGAAAACAATTGCCGCTGGATTTAGCATTGCTCTTTTCTATTTCTGAAAACTTATGTATAAGCAAAAATATGTTTGATTGTCCATATTTTTTTGGTATTAGAAGAGGGTAGAGTAAAAAAAATAATAATAGAAAATTAAAGATTAAAAGAACATTTTGAGGCATGCAAATGTCAAAAATGTTATAAAAAATGAGACATTGAAGCTCTTTA…
MsMYB040	MSAD_233710.t1	Medtr6g477860.1	At1g18330	At3g29035	PubMedID:27117388	MSAD_311655.t1	Medtr4g108760.1	√		√	√	√		√						√	√			GATACCCTCAGATCCTAAAAAATATAAGCAGAAGATGGAAAAAAAAAATGAAAATTGAAATTAATAGGATAACTATAAAGGGGGGAGATGACTTTCATGATTGGGGGATTAGAGGAAGGTGGATAACCTAACAAAAACAAAAAGAAGAAAGAAAAAATTAGTTTAAGATTAAATAAGAATGATAAATTGAAACTTGGAGAATGAATTAATCAAATGGGTACACAACTTTTAAATTGCGAGACCGTCCATCACAACCAGCTCCGACCTCCGCCGCTTTGTGTTGCAGAAAACCTCTAAAAGCCACCATTACCGAGCAAATCAAACAACACCATCAATACGATTGGAGAGATGAGGGCAACAAAGAGAAAGATACAACAATGGAGGATAGAGTTATGGGGG…
MsMYB040	MSAD_233710.t1	Medtr6g477860.1	At1g18330	At5g61380	PubMedID:27117388	MSAD_311663.t1	Medtr4g108880.2		√	√	√			√		√						√		GGAAAAAAATTAAAGTTTAAATTTGGGTAGTTATCCAACATATGCTAATTTCCTAACTTGAGTTTTGCCTTTTTGAAAGTTTATTTGGCTTGTAAGTATATTTAATCTTGTATTGTTAAATGCGAGATAATATATCAATGAGATTAATTTTTCTTAAAAAAAAATATCAATGAGATTAATTTATATTTTGAGATTTATAAAGTATGCATAAATGACAACATATGTCAAAATTAATGCATGCTAATATACTTAAATTAACAAAAATGTTTTTCATAGAAAAATGAGAGCATCCAAACAAAGTTCAAAGTTAATATAATAAAAACAGTTTTAAGGAAATTATTCATATTTATACAAGTAAACCAACGTAATAGGCTTAAAAGGTTTCTTTTGTGGCCTAAA…
MsMYB040	MSAD_233710.t1	Medtr6g477860.1	At1g18330	At1g74360	PubMedID:27117388	MSAD_250746.t1	Medtr4g109170.1		√	√		√		√	√				√			√		TTTTTCCTTTGTACTATAGGCATTCTTTACAAGCAAGTACTGCTCTCAGCACCTAAAATGACTCCAGTTGACCCTTTTGGTCATTATGTCGATTCCAAAACCCTCAATCCACCAGCATTAATGCCAAATTTTCCAAATAAAGCCCTTATTCTTACCTATTGAACCCTTCAATGTCCTACATCAACCCTTATTCTTTTTGTGTACTCGTTTAATCGTTAGTGTTAGGGAAGTGACTTTGCAGTCTACACAGAAAGGAAGCTTTGTTCTTACCGTATTGATTTATATAACCGTTTGCATGTGTTATTAACTCTCCTTACTGTTTTGATAAAATCATGACTTGTTATTTGCTTGATCATCTGTTTGTTCATTACGGAATATTTTTCATTGTACAGATGGAAG…
MsMYB040	MSAD_233710.t1	Medtr6g477860.1	At1g18330	At5g08139	PubMedID:27117388	MSAD_289918.t1	Medtr4g110100.1	√						√										CTTTTTAATTTTGTTTTTTCATAATGATTTTCAGTTTTTCTGATATATTATATTCTACTGTTTTGGCTAAGTGTGTGATATTTCGTGTTCTATCATCAGTCTCGATGGACCATTTTTTGTTTTTTCTTTTTCTTTCCATTAAATATAGGGTTTTGTTAATTTATGTTCTTTCAGTACATGCTACGAAATTTAAATGTAATATTTTTATATCAAAAATAAAAATGTTTATACTTTAAAAAATTTAAGTGCACGATTTATGAGACAAAAGTATTATTCTCCTAAGATGGCAATATACTAGCAAATTTGTTAAGAACATCCTTTAACAAAACTCTCCTTAGATGTATGATCAATTAAATGCATTCAACCTTAGATGTATGGCCAATACTTTAATTTCTTGTA…
MsMYB040	MSAD_233710.t1	Medtr6g477860.1	At1g18330	At3g18550	PubMedID:27117388	MSAD_249634.t1	Medtr4g111935.1							√	√	√		√	√	√	√		√	CCCGATGCATCCATCCACATTGAGATGCAACTAAGAAGAAAGGTTTACAATGTTGTAACGATAAAATATCTTAAACGATAGCACGCATATGTGCATTGGACAAGTCGTCTGGTTCAAAACTAAACCCTTGATCCCCAGCAACATGAAATCCTCTATCTAAAATCAATGAAGGTATTTTCTTAACCTTGGAAAATGCTTCCAAGTCCTCGATGTCGTCATTTCAGTATTCTCCAACACCAAACTCTCGTTCCAGTGCTTCATGATCAAGATGAGGAAAACACGAGAAAAAGGGTTGAATTGTGTTGATTTTTTCAAAAACATTTCTAAATATTTATCAGAAATAGTTTAGAGAATGAGAGAGCCGTTGTTGAAGAGGTGTCAGCACATCAATTAAGTCCT…
MsMYB040	MSAD_233710.t1	Medtr6g477860.1	At1g18330	At2g26900	PubMedID:27117388	MSAD_250523.t1	Medtr4g113090.1		√		√	√		√	√			√					√	TTTTTATTAGAGATATCTTAGACTATGTTATTATAATAAAAAATTAAAATAAAAAGTTAGAATAGCATCGCACACGTATATTAAATTGCACTCAAAAGCTTATGTATTAGCTTTATTAAAATAAAAATAAAAAACAGTTTAGGTATTAGCTAACGTATATATGAGATTTTTTAATATTTAAGTGAAAAAATAATAATTATATTCGTCATTTCTGTTAGAGCCGCCCTACCTCAAGACAATTATATTCGTCAATTCCTGCATGAATATTTTTATTACACATTTTTTTAATTTAAAGAAAAAAATTGTTAAAGTGGTGTAACACATATGATAGATATTTGGATCTCTTAACTATTATTTGGTCCAAAATTTGATCTTTGGTCATGCGTAAGGAAAAAAAAA…
MsMYB040	MSAD_233710.t1	Medtr6g477860.1	At1g18330	At5g11190	PubMedID:27117388	MSAD_330023.t1	Medtr4g114570.1	√				√		√								√		TTCTCCTAGCTGCTCTACTCTTTTCACTATCTGTGAAATAAACATGTGTCCCTTGCCAACAGAAAAGAACACTAAATTAATACATAAATTGAAAATTTTGGGCATAAGAATATATTGGTGGATACATAGCAAAGAAGCTATGAAGCTCGGATAAGGATACAAGTGCGATTACGATACGATACGGGTACACGGATATATGAACTTTTTTAAATGTAGGATACAATACGGCACATTAATAAAAAATTTATACTAGAACTTAAATGTATGTAAAATACTTGAATGAAGTAAACATTGATTATTCTTTATTATTATATTAATATAAAAGTCAAAATTTTACAAAAATAATACATGTGATCAAAATAAAAAAATGTAAAGTTTTCTTATAAACCATATTATATT…
MsMYB040	MSAD_233710.t1	Medtr6g477860.1	At1g18330	At5g18840	PubMedID:27117388	MSAD_241203.t1	Medtr4g118610.1	√					√	√	√				√		√			ACATATTATTTTTTTTGAAGAACATAATTCTTTCTTATAAAGTAAGAATCGCCCATTTATAAACATTTGCTCGTAACATGTTATATTACCCAAGAAGCATGGACGCAAACAGGACAGACACACTGACACACACCGATCCATATAATTACTTGAGACAGACACACCAAAACAAATACTAATTTAAGAAAATGACATAATTTAATGCAATTATAGGTGTCGTGTCGAACACAAACGCGTGTCCGCATCAAAACACACCTAATCCGAGAAATCTTCATGCTTCATATTGAAGGTGAGAAAAACACAAGAAGGGGGGTTGAATTGTGTTTTCTTCTTCTCTCTTAATTAATCTACTTCTGATAAACCTTCAGAAGCAGTTTGTGAATGCTTCTGATGAATAGA…
MsMYB040	MSAD_233710.t1	Medtr6g477860.1	At1g18330	At5g57380	PubMedID:27117388	MSAD_307500.t1	Medtr4g127880.1	√		√			√		√									GGTGAAAATGTACTTTTTTAAAGTGATTTTTTTCAATGTTAATGGATAATGGCATTTGTCTTTTATGGGACGACTTTAATTTCTGTATGTAAAGATAATGTAAATTTTTTTAATATTGTGAATCGATCATAATCGATGAATTGTATTTTAATTTTTTTTACATTAATTATATTTCCTTAAAGATTTATCTAGACAATATTCACTTTAAAGATAATTTGTGATTGGGAGTTACGATCAGGAGTTACGACCTGATGCGTATTGATCCATACCGAAATAAAATCAGAAACCACCATTTTTGTGAGGTGGATTCTCTGTCTTTGTACGACGAGATATGGGAGTGATGGTAGGTAGAACACTGTTGATAAGAAGAACATTTCTTATGAAGCTAACAATCTCCAA…
MsMYB040	MSAD_233710.t1	Medtr6g477860.1	At1g18330	At5g57685	PubMedID:27117388	MSAD_317733.t1	Medtr4g129020.1			√	√			√	√			√	√				√	CCGTCATCAAATTTTCAATGAATGTCCCTTGGGTTTCATTGATCTCATGTGACACATGAAATGCTTGTGCTGCAGGTCTACTTTGGTCAGAATTTAGTGTGGAACTGGAGTGATTCTTCTGCTAAAGGGGATGGAAAAGTCCTTAAACTGGGAGATCCTGTTTGTGTTATCAAAAAACTCTCTTCTCCTGCAGAAGCAGCTGCTTAAAAGGCTGCAGTGACATAAACTTTATCAAACTCTTTTTTTGACTCAACTTTATCAAACATGAATATCAGTAGCTATGATGAAATTAAGTGATTATTACATGGTTGCAATGCATTTATTATGTCCTGTATCCAAATAATCACATGACAATAAGAATTCTGCAAAAAATAAAAAAAGTCTTTTTATTTGTTTTCA…
MsMYB040	MSAD_233710.t1	Medtr6g477860.1	At1g18330	At2g23810	PubMedID:27117388	MSAD_317688.t1	Medtr4g129670.1			√				√	√	√	√				√			AGCGGTTTCCACCTCTTGGAGAGGACGGTTGTGGCGGTGGCGTCTTTCGACGGAAGAAAGGAGAGAATATGATGAACAAGTGAGTCTGGAAGCGCACTGATTCTGTCTTCTTCTTCTGGAATTGAAAGCTGCAGCTGCCGCCGCTGCCGCAGCCGCCGTGACATTGCGGCGGCGAGTGAGGACAGGATAGTAACACCAATTGGAATTAGTGAAAAAAGGTCAAATTTGGTGTCCTATCCCTATACACACGCACATTCAGGCCCAGGCCCAAACCCCAACAACACATTTGATTTTGATTTGTAGCAACCTAATAAAGTAAATATATTTTTGCAATCTGCTTTGATCAACAAAAAATATTCATTCAATCACAAGAATTTCTAATCCCTGTGAATGTTCTAA…
MsMYB040	MSAD_233710.t1	Medtr6g477860.1	At1g18330	At2g24240	PubMedID:27117388	MSAD_315592.t1	Medtr4g130970.1					√		√				√		√	√			ACATTTAAAAATGGTTCGGCGTATCTTACGATATGTCAAAGGAACTATAAATGCAGGTCTTCATTTCACTTCCAATGCTACGCTTGATCTCTTTGCCTTTTCTGATGCAGATTGGGCAGGTTGTCCTACCACTCGGCGCTCTACCACCGGCTTTTGTACTTTTCTTGGAGGAAATATCATTTCATGGTGTGCAAAGAAACAACACACAGTCTCTCGCTCCAGCACTGAAGCTGAATATAGGGCCATGGCGAACACTGCAGCTGAACTCACATGGCTGACATTCCTCTTAAAAGACCTTCATATTTCCCTTGCTTCCCCTCCAATACTTTATTGTGACAATATAAGTGCTCTTCACATGACCATCAATCCAGTTTTTCATGCTCGCAGCAAACACATTGA…
MsMYB040	MSAD_233710.t1	Medtr6g477860.1	At1g18330	At4g17150	PubMedID:27117388	MSAD_317796.t1	Medtr4g134350.1				√			√	√					√		√		GAAAAATCTTTTAAATTAATGTAAGGTTTTGAACTTACTTGAAGAAATTATTTTTCTCTGTTTTTGAAATTTTAGACCTAAGAAGTTCTATTCCACAGTAAAATTATTTTTCTTTGTTTTGTCCTCGCCAACATTGTTGGTAAAAAAATAAAGGGTCATGCTACCAAGTGCCCTTATGACATTTGTTTAGAAGGTAAAAATGAAAGGGAAATGTTAACCGGTGCATCCGGGGCACTCTTTAAGACCTTTAAATAGTAATTTTTTTTTGAAAATTTATGTAATCAATGCATCGGGAATTGAAATATTTAACTTTTTTTATGAAATAATTTCTTCTTTTAGTATTCTTAAAGAGTGTCTCGGAGGCACTCGCTGACAAGACCCAAAATGTAAATAAGTGAC…
MsMYB040	MSAD_233710.t1	Medtr6g477860.1	At1g18330	At5g49900	PubMedID:27117388	MSAD_228653.t1	Medtr4g134760.1	√		√					√									TTAATTTGTTCCTAAATTTTCCTTGTTTCGACTTTTAAGACTTGGGTGTATTATTCACCCAACTAAGCAAAATCAACACATCTCTTTCACTTTCTATATTTCCATGTTTTGAATTGAAATTTCAAGTATAGGTCAGTGTCTTAAAAGGGTAGGTGGTCACCATTCAAAACTAACTCTTCATAGCTAGATAAAATGGGTTGAAATATAGTACCGTTTAATAATGATACATTGAAGCTGTAAATAAATTTTACTTTTATGATTATTTTTGTTTCATTATCGGTATATCAAAAGTAAAAAAAACATATTTCATTATCATTTTTTTTAGGGAATTATCATTTTTAAGAAGCCAAAGAAATTATATTAAAAATAAGGTGGATGTTAAGTTAAGCACAAGATGTG…
MsMYB040	MSAD_233710.t1	Medtr6g477860.1	At1g18330	At4g27630	PubMedID:27117388	MSAD_258415.t1	Medtr5g005440.1			√	√	√	√	√	√			√				√		ATGTTTTCTTTGGGTTGGGGAGTGAATGACGAGGCTTAAAAGTAGCGTATGAGGTTGCTTGAAAGTAGCAATCAATAATCAGTGATGTCCTACGAATTGTGGTTCGAACAAGGATAAAGATCACTTGTTTGTTAAATGTGATTTTTTGGTAGAATTTGGTCTCTTATATCTAGTTGGATTGGTTTCTCTTCGTCTCTTCATTATAGTTTATTGAATCATCTAAATCAATTTGGTTAGATTATCCCTTAATATCATTTGGCTTTCTGTTGTTTGAGTTATTTGGAAAGAGTGTAACAGACGGATTTTTCAGTAGATGGAGGAAAACTTGTAGGCGCTTTGTGAAAGGGTGAAGCTTCGATCCATTTGGTGGTTTAAGTCAAAATATGTTTTATTCGACTT…
MsMYB040	MSAD_233710.t1	Medtr6g477860.1	At1g18330	At4g23730	PubMedID:27117388	MSAD_315177.t1	Medtr5g009670.1				√	√	√	√	√			√	√		√			GTTCTCAGTTTTGTTCTGTGCTAATTTGACCCTAAAGATGTTTTACATGCATAGTAACTGCTGGCTGTATATTTATGGAGATGCATGCTATTGTTACTAACCATCTGAAACTAACTGTTCAGTTTTCCTACATTTTCTTTGTGCGGGTCTGCAGACAAGTCTCCATAGAGGACGGGGAAGCAAAAGCACGTGAGCTCAATGTCATGTTTATTGAAACTAGCGCTAAAGCTGGATTTAATATTAAGGTAACTTGGGCACACTTTTTCCCCTCTTTCCATACATCTGCAGTAATCGCTCTGTTTCCCTTTTCTCCCTCTATCCACATGTATTCAGTAAATTCTGTTTCCACCAGAATGAAGTGAACTATACAAAATTATGAGATTGGATTCTGTTTCTACT…
MsMYB040	MSAD_233710.t1	Medtr6g477860.1	At1g18330	At5g67080	PubMedID:27117388	MSAD_331373.t1	Medtr5g017110.1				√		√	√	√							√		AAGAAACTAAACCATTAAAAATTCAAAGTAGTTTCAAATTTAACATGTAAAGGGAGCGATTGTTACTTAGGGTTTTGAAATGATATTGACATTGGAAACAAATGTGATTTGAGAGAGACATATGACCTCAAAATCCTACTGTTGAGAAGGAACTACTGTTGAGAAGGAACAGTGTAGCATCATTCTTACATTTTGTCTATGTAGTCTAATCTATTTTTTTGGTCAGGTAGCCTAGTGGCTGGAGCTCACACATTTTAAATGTGGAGAAGTGGGGTGTTCGGGGTTCGAACCCTAACCTCTGCATATATTATGCAATGTCTCTGCCAATTGAGTTAAGCTCTTTGGAAACGTCTATATAGTCTAATCTATTCGTTATCACAATGTTTCTTTTGCGACAAT…
MsMYB040	MSAD_233710.t1	Medtr6g477860.1	At1g18330	At3g50640	PubMedID:27117388	MSAD_213653.t1	Medtr5g017580.1		√		√		√		√				√					CGTCGTCATAGTGCGATGTTGTTTTGTCTGTCGTCTTTTTGCGACGTTGATTGTCTTTCTTGTTTCGTTCAGGTATTTGTTTGGTTCAAATTGTCAGATCAGCTTCGATCCAGTGCAGATCAAATCAATGATTTTGAAGTCGTCAACGTTGAAGATCCAGAGACATGAATGTTCCGTAGACTTACATATAGTCATATGTGTATGCTTTAATACTTTGTCGTTTTATATGAATGAATATCATTTATTTTTGTCAAATAAAAACTTAATATTACTTATTTCCAGAAACTTAATATTACTTTGTTCATATTTGAATCCAGAAACTTAAACTTCTTTCCCATTAACTCAAATTAGTTGAATTATCCGACCATTAATAAAATTTATAAATTCATTGATACAAAC…
MsMYB040	MSAD_233710.t1	Medtr6g477860.1	At1g18330	At5g66580	PubMedID:27117388	MSAD_255762.t1	Medtr5g018720.1							√	√	√		√	√					CATTTATTTACTAACTCAAAAAAAATACTAAACTCCGTATTTAGCCCCACTTATATAGGAGTTAAGGAATCTACCGTCGATGGCTGTGAAGTTAACGAATCAACAGCTGATAGCAACCATTATGGGAGGATGATTTACAAAACTACGGTGGAAATATACTCCTACATGGCGGCAAATTTTTTGAACGAATGGTGCTCTCAAACTCATTCTTACCTTTTTAAAAAGAAAAAGAAAAAACTCATTCTTACTTATATTACTTTCAATACTTAGTTTAAAATGTTATTGATATAATTTATTTTTAGGTATGATGAAGTGCTAGACTATTATTAAAGAAAGAAGAATGTTAACCGGTGCTTCAAGAGCATTGGTTAAGCACCAAAAGAAGTAAATTTTTATTAA…
MsMYB040	MSAD_233710.t1	Medtr6g477860.1	At1g18330	At4g19390	PubMedID:27117388	MSAD_326623.t1	Medtr5g025750.1				√			√	√		√	√						TTATGAGCAAAGTAAAAAAAAACAAAAAAGTGGACAAGAAAATTTAAAAAACAATACATGGTAAACATGGTTAGTTGAAGAAGATAGTGGGCAGTTTTTTTTTTATTATAATAAAATAAAATAAAATTAAGAAAAGGTTAAAATGGGAAGAAAGTATAAAAAGCTACAAGCTATAAGCTAAAAAGCTACTTAGATTAGCTTCTTAAAAAACGCTATAAGCTAGTGAGAAAAACTTTTTACCAAACACGTCTCATTTTATCAAAACAAGTTTATAAGCTAGTCCAACAAGTTATAAGCTAACTTTTTTGTGTTACCAAACACAGCCCTAGTATAGCAATAAATAATAAAAGTACAACGGTTGACAGATATTAGGTGCCATTAATTGGTTAATTAGCCTAA…
MsMYB040	MSAD_233710.t1	Medtr6g477860.1	At1g18330	At1g76590	PubMedID:27117388	MSAD_307584.t1	Medtr5g030130.1			√				√	√				√					ATTGTTGGAACCAACTTGTTAGAGCCTGTTTGGTTTGGCTTTTCAACATCAAGAAGTGATTCTACAACCTTCAAAAGTGAAACAATGAGTTTTTATGGTGTTTGATTTGGTTTTTAAGAATTGATTCTATCCTCCAAAAGCAATTATCCTTAAAGCTACAAATTCTAGCTTCTAGCTTTTCTAGAATCAATTCTACATTAAATTTTCTATTTTGATTATTACAACCTATTATTTTCCTTTATTGCCCTTTATCAATTCTCCTTCTTTTTGCTTTGTAATTTAATTTGATGAACCAAATTTAATTAGAAAACTTAACAAACCAAATTAGCCCCTGAAAAATATTTATGGTCATGACTTACCAAATTTTGAATTTTTCTTTACAGTGTCCCCATTCAAATT…
MsMYB040	MSAD_233710.t1	Medtr6g477860.1	At1g18330	At1g26780	PubMedID:27117388	MSAD_219217.t1	Medtr5g041570.1	√	√						√						√	√		AATAGCATTTAAATCAGTGTAAAAATTAAGCATTTTAATATTGTTTTGCACATTATTTAAATAAAAATAATAATAAAAAATCGTTAAAATAATTGTGCACAAAGATTTTTTTTATTTAAGTGATTTGCAAAACAATATTCAAATGCTTAATTTTTACACTTATTGAAATGTTTTTTTTATTTATAATGTTTTTTGTTTTTGCATTTTTTTTTTATTGAATCACCATTTTAGATCCATTAATTATCGATGACAAATTTTTTTATTTTTTGTTGTTGCGTTTTTCATGTTAAATAAGTAATAATATCTGAAATATTAGTATAAAGTAATAATAGGTTAGTCAAACCTATGAATAATGACAGACATCAACGAAATTAATTAAAAATAATTACAAATATAATT…
MsMYB040	MSAD_233710.t1	Medtr6g477860.1	At1g18330	At1g69180	PubMedID:27117388	MSAD_229505.t1	Medtr5g046230.1	√		√	√	√		√	√									TTTTCATAGTATGTATTTTTTAAGTTTTTTCTGACCAAGTAGTATGGCTGTTTTTGGTAACACAAAAAAGTTAGCTTATAGCTTGTTGGACTAGCTTATAAGCTTGTTGGATGAAAACATGATGGGTCTGTTTGGGAAACTAAAAAAAAGAGCTTTTAGCTTTTAGCTTATAGCTTATAAGCTCGTTTGACAAAAAAAGCTCTGTTTGGTAACACTTTTTCACCATGAGCTTATAGCTTATTTCACGAGCTTATAAGCTATTTTTCAGAAGCTATTCCAAGTAGCGTTTGAGCTTATAGCTTCTCACTTTTTCTTCCAATTTTACCCTTATTATTTCATTTAAATTGTATTTTTATCCATTATAATTTTTATAATAAGCTACGTAATAAAGACTACTAT…
MsMYB040	MSAD_233710.t1	Medtr6g477860.1	At1g18330	At1g07050	PubMedID:27117388	MSAD_327664.t1	Medtr5g072780.1			√	√				√			√	√					TTACTCTTTTTTTTTCTTCTAAATTTTGGTCTCTTGCATTATTTATTTGTCATTTTGTATGATATGACATATTCATCTATGACATAACAAGAGTTCTTTTTTGTCAAGTAGTCTAATAGTTATAAATTCATCTCTTTAAAGTAAATAAGTGGTATGATTGAGGTTTGAACTCGTCTCCAACATATATTATGGAATGTCTCTATCAGCTTAGCTAAGTTCATAGAAACATTGCATAACAATAAAAAAAATCTTTGTCAGCAAAAATATGTATAATAAATACCGACATATCATAAATGAATAGACTAATAAAAAAAATGACCAAAAAATTAGATGGTGGATCAAACCCCATTTTTTCGTACCAGCGAACCACCTCCAAGAGTTTATTTAGATGTTGTCAAT…
MsMYB040	MSAD_233710.t1	Medtr6g477860.1	At1g18330	At3g03250	PubMedID:27117388	MSAD_267207.t1	Medtr5g077000.1		√	√	√	√		√	√			√	√					GTTTGTTGTCTTAAATATGACAGAAATATGCACAAGCTAGTAAGTCTAACTATTTTGAATGAGAAAAACTTCTGTGTATATGTTGATCTTCTATTCATATCTGGATAATTAGGTTTATTAACTTCTCTTGTTTGACATTATGTTTTTTATCCACATTACTGTGTTGGAAATTACCTATTTCAAACACAATAATGCGAGAAAAATAGCTAAATAGGAAAATCCATTCTCATGTTAAATTTCACTTGATTTAATCATGTGAAAATTGTGTTTCTTTTTCATGAGTGTTACCTATTCAATCTCTGAGATTTACACTACTTTTTATATCACAAGGTGATATAAAAAGATGATTCATTCCAATGTGAATAATCAATATGGCATGATAAAATTGGTAGATAACTT…
MsMYB040	MSAD_233710.t1	Medtr6g477860.1	At1g18330	At5g37530	PubMedID:27117388	MSAD_267170.t1	Medtr5g077840.1	√		√			√	√	√							√		ACCTTTGATATCTCTAGCATACCAATATAATACAATACTTTTTGTCACTTTTGGTGTGAACTCAATTACATGCCTTGTGTTAACCAAAAAACAGATCAAAGGGACATGTTTTGTTATACAAATTAAGTTAATTTGATAACCACTTATATCTTGCCTAAAATGATGACCGATGGGCTTGTATATCCAACAAAGAAGGTGTGTTAATTAACCAAATTAGAAGGGCAATTCGGTATACTCATTTTTAATCAACAAGCTCTCGGCCTATGGGATAGTTATGCTCCTTCAAATTAAGGTAATGCATGCATGTTCATGATTATAAGAAATGAATACATACATGATGGATTGGAAATTGAACATCAGTAAAGAATAATATATATATATATATTTAGCGTACCTATG…
MsMYB040	MSAD_233710.t1	Medtr6g477860.1	At1g18330	At2g40380	PubMedID:27117388	MSAD_221422.t1	Medtr5g083490.1			√	√			√		√		√					√	ATTTTTTTTTTTTTTGAGCAAGTTTTTTTCAAAAAACTTAATTAAATCTTCGAAAATCATAATTAAATTTTTTGAAAACAAGTTTATTTCAAAAAGTTTATTTATATTTTTTAAAATTTTGGAAAATTAATTTCCATATTTTTAAATTAATTTTTTATTTTTATATGTTTATTTTAATTTCGAAATATATTTTTTGTTTTTAAAAAATGGTTTTAAAATAATAAAATTACAAAATCTAGTGATGAGGGAGTATGGTAAGGATGTGTTCTTGGTTTGATCTAATGGTTAAAAACTAACTTTCCCATGGTGGGAAAAATTAGCCTTTCCCATGCTAAACTTCACCTTCAATCTATCCTTACCTACTTTATGAGTTTTTCACTCTCCCTCTATCTTTTTGTG…
MsMYB040	MSAD_233710.t1	Medtr6g477860.1	At1g18330	At5g37780	PubMedID:27117388	MSAD_247790.t1	Medtr5g088320.1				√			√	√			√						AGCAGGGTCTGCAGAGGGGACCGCTTTTCAAGGATTAACTGTCGAAGGTACGGAGCCCAAGAGGGATGGAACTGCAATGGCTTCTTTGAAGGATGCACAGAGAGCCGTCCAAGAGAGTCAAGCTGCCGGCTGGGGCAGGTTAATACAGCTTCGTGAGAACAAGCATAAGGATAGCTTTGCATAGGATGATGAAGAGATGAAGATTCAATGCCTAAATCCATAATGTCTCAACAAATCTTGGGTTGAATCTACTCCTAACACCTTGCTTTGTGTTTCTCTAGAAATGTCATCTCTCTATCTCTCCAAAAATATGTGATAATGTGCTTGCTGCACAAAACCGTGTTGCCCCCTCCTAGTTCCTGTGCGGCTCCTTCTATAACAATTGTTGAACTTTCTTTT…
MsMYB040	MSAD_233710.t1	Medtr6g477860.1	At1g18330	At1g80680	PubMedID:27117388	MSAD_300248.t1	Medtr5g097890.1	√	√	√		√						√	√				√	AGTCTTCACACAAATTGTTTTTCAATCTTATTTCTTTTTGTAAATTTAAAGGGAACTTTAACAGGGTTAGGAATGTTTTGGGATGTTATTTATTTCGTAAAATGCATCGTATCTTATAATATCATGATCTGATCTTAGAGCAACTTGATGATCTTTCATTATGTCCTAGGATTGCTTTTTATATTTCCTTATATGTCGCAGTTTGTTCGCTTATTTAATTAGGAATATGATGAGTCTAGTATTAGTGAAAATAAGAATAACCGTTTTGTCTTATGTAAGAAAGATCTAATATATTATCCATATCACATCAATATAATTTTATTATTTAGTATTCATGTTCTGCCCTGTGTACCTAAAGGATTAAACCCTATAAACTATAACACCAACAACTTCTTATGC…
MsMYB040	MSAD_233710.t1	Medtr6g477860.1	At1g18330	At4g35310	PubMedID:27117388	MSAD_252907.t1	Medtr5g099240.1	√		√	√		√	√	√				√					GAATTAAACACTCATTCTAATTTGCACAATTTACCTTTATTATAAAACTTCTTATCTAAAATCATATATTAAAACATCTCATGTAGTAACAATTATACAGAGAAAATGAATAAAAAGGAGACTCATGACTTCAGAACCAAGTCCTATTACTAAAAAAGTGATTTGATTTGAAGGTATAAAAATGAGGGATATCTTTTATTTCTGCTGTTGTCAAAAGACTCAAAAGGGATTGGATCATGACCTTATATGCTTTTGTGCATATGATTATGTCTCTGCATAAGATGAAAAAGGGCATAGTCTAAGGCATTATGCTAGCTCATCATTCAACTTAATGATTTCAGCACATGATTCTAGTAAACTTTTTAGATAGTAGAATCTTAGAGAACTAACTTTATTATT…
MsMYB040	MSAD_233710.t1	Medtr6g477860.1	At1g18330	At3g02885	PubMedID:27117388	MSAD_329471.t1	Medtr6g012360.1	√	√	√	√	√		√				√						AATTTCAAAGCATATTTTTTGGGTTTGGTGTTAAGCTTCTGTTTTTAAACCAGGCTTAAAATGTACACTGCCTACAACAATGATGTATTCGTGCTTCAGTTGATGATTGGATTCAAAGACAGTTGATTACCACTCATATAGAAATAGTGTATTGGAAATTCTGTATTTAATTTTTTGAAAATTTAAAAAATTGTTTTTATAAAGCATAAGTTCTATTTTTATTTTTTAATAAGTACTTTAAGGAACATGTTAGCAGGATACTTTTATTTGCTTATAGTTATTTCATTTGGGAGGGAAGTATAGGTAAATGAGAAATGGGTAAAAAGTGTTTATAATAAAAATACTAGTAGGACAGATATACTTACCTCAATGAAATAAATTAGTGAACATGTGATGTCC…
MsMYB040	MSAD_233710.t1	Medtr6g477860.1	At1g18330	At3g26030	PubMedID:27117388	MSAD_261832.t1	Medtr6g022720.1			√	√			√					√	√				CACAAGATAGCACCCCCACTATCTTAAACAATAATTCTCACCAACAATGACAAGATTCTTTACAATAAAGTAATTGAAAAATAACAAATATATGGTTGTATTTCTTTATCAATATCACTCTAACAAATTGACTTAGTGCTCATAAAACTTTTAATAAATGTTAAAGTGCATGCAAAAACTTTTCCAATGAAAGTTTAAAAGCAACTTTAACAGTTTCATGCAAAAACATTTTCTAGCAAAATTATATTTAAATAAAAAAAAATGAAAGAAAATAAATTATTTAAATAAAAATTATTGTGAGTGTGTGATTTACTTTCATGAGTATTAGCATTGCTTCATATGGTGACTTAGAAAAATGTTAGTAATTATTTTCTGAGCATTCTAAGTTGTTCCATAAGT…
MsMYB040	MSAD_233710.t1	Medtr6g477860.1	At1g18330	At3g02070	PubMedID:27117388	MSAD_253092.t1	Medtr6g033065.1	√		√				√	√			√						GGTTTGAATCCCAGAGCTTGCATATATTATGCATTGTCTCTAACAACTGAACTAATTAGCTCACGAAGACAATGAAATATATATATTATTTTTTTGTGGTGGTCGGGGTTTGAATTCCAGAGCTTGCATATATTATGCATTGTCCCTACTAAACTGAGTTAAGCTTACGGAGACATAAAATGAAATATTTGTTTACGAGAACTAAAGCATCATTTTTATTTAAGGATTATTTGATCCAATGATCCCTTAAATAATTTCGAGTTTTCATTTTGGTCTTACAATTAATAAAATTTACATTTAAGTCCCTCACTTTTTTCTCCGTTTGCGAAATAAATCTCATCCGTCAAATAATTAGAACTTCCATTAGTTAGAGCCCACGTGGCAAAAAAATCCAAAAAA…
MsMYB040	MSAD_233710.t1	Medtr6g477860.1	At1g18330	At4g22730	PubMedID:27117388	MSAD_288055.t1	Medtr6g060230.1		√	√	√	√		√	√									GGGCTCTCTTCAAGCATTTTAAAAGAAGAAATTATTCTATAAAAATGTCAAATATTTCAATTTCAGATGCTTTGATTACATAAATTTTCAAAAAAAGTTACTATTTGAAGGTCTTAAAGAGTGTTCCGGAGGCACTAGTTAACATTTCTCTAAAATTAATATTGAGTTAATATCGAGATTTTTAGAGAGTGACACTGTTTTTTTTTTTTGTGGTGGCCGGGGTTTGAACCCTGGACCTTGCATATATTATGCGTTGTTCATTAAGCTCACGAGGACAGAGAGTGACACTTTTGTATGATAAGCTACGCTTCCCATTGATACACTACAAGAATTTTGGTTTTTACGGGTAGAATTAATCCCTCACTAAAATTTAACCTTTAAATAAAATAAAATAAATTT…
MsMYB040	MSAD_233710.t1	Medtr6g477860.1	At1g18330	At4g25470	PubMedID:27117388	MSAD_290269.t1	Medtr6g465530.1				√				√			√	√					GTGGTAAAGGAAAATTCAAACTGCAAAATATATGAAAGTTTGAATTTTCTTTTGTTTTGGTGGGTAGTCTATTTATATACTGCATATTTTTGCGTCAACAGCCTATAGTACTATTTTTCCTGATAATTATAGAAGCAAATAAATGTCTCCAACTGCCAAAAAGTTTATAATAAATTGGATGGTTTTTTAGCGTGTTAATTGAGTAAAATGTTAAAGTTTATGGTTGTGCACAATATGGTGGATGGTTTGGAAGCATATATGATCCTTATTTGTTTATAAGAAAATGTTCGCTTAAAAAATAAAAATTGTCTTAATGATTTAAGATATGAAGTTGTTTAGTATGAACCCGATCCATAGGCAGATCCTATTAATTATTTTTGATAAATTTTAATGAAAGGG…
MsMYB040	MSAD_233710.t1	Medtr6g477860.1	At1g18330	At5g15230	PubMedID:27117388	MSAD_290166.t1	Medtr7g010580.1			√				√				√				√		CCCGCCATTTGAAATGGCGGTAATGAAATTAAAAAAAAATTTAAAAAAAGGTGGCCAATCCTGATGGGACATGTGTCAAACGGCGGCTCATTCCCCCCGTTTCAAATGGCGGGAATGGAGGAAAAGGACAAAAAAAAAAAAAAGTGGGTCATTTTGGAGTTTTTTTTCATAGGGGGTCAGACTTGATTTTTTTTTTGTACATTGGATCAGAAAAAAAAAAAATCGACTTAGGAGGTCAGACTTGAATTTTTTTTGGTATATTGGGTCACAAAAAAAAAAATTCGACCTTTATGTTTCATTTGTCTAAATTTCCAAAAGTTCAACGTAAATTTAATGAAAATCTAGATTTAAAAATCATATTTTGAACATTTAGCGGAGGATTTTTGTTATAATGTTTTA…
MsMYB040	MSAD_233710.t1	Medtr6g477860.1	At1g18330	At1g74080	PubMedID:27117388	MSAD_260968.t1	Medtr7g011170.1	√		√	√			√				√				√		AACATTCTCTCTCTCGTGCTAAATTTGGGCACATATGAAATCAAACATCTAATACATTTAAAAATAAAAAATTGATCAATGTTCCTTATAAAAAGGACAAAAAAAAATTACATAACCGGATGGAGTAATATTAATTGATTACTTATACTAAGTTATTTTAGAATTGTTATTGTTCATCTACCTATTTACGCATTACAAAATCTTACATATAGATAATTAGTATGTTCATTTATCGCGGGGATCATGATATCAAAGATACTCCATATCTAGTTGTACTAAATAAAAAAAATGCAAGTTTTCTTGATATGTTTCAGAAATTAGTTTCATAACACATTCTTGTGTTCACAAATTACTTTCTAACTCAATTTTTTTCAAAATTTAGTTTCCAAAATCGTTTTC…
MsMYB040	MSAD_233710.t1	Medtr6g477860.1	At1g18330	At3g25560	PubMedID:27117388	MSAD_232107.t1	Medtr7g018200.1			√		√		√	√				√					TTGAATTTTACAATTGTTTTCTTTAAAAAAAAAATATATGCAATTTTTTTAGCGTAAAAAAAGTAAAGGGAGAAGAAAAAAAAATTCTTTTAGCGTAAAAAAATATATGCAAAAAATTTTTTCTTATGCAATTTTTTTGAAGGAATAGAATAGAATGAGTGAATCTTGAAATTTTTATTTCAAGGAAAGGATTTTAATTTAACCCTCAAAAAATATTTTTGTGTGAAAAAATATCATGCAATTAAAAGACATTTATTGTTTTGTTATTTTGTGGTGATAAGTGTTGACTACAATAGAAAATGAAATTAAAGCCTATCATATCAATTAATCTAAGCCATTAACCAATATTAGAATTAAAGATCAAGATTTGGAGTAAGATATTACACTTACTCTTGGAGT…
MsMYB040	MSAD_233710.t1	Medtr6g477860.1	At1g18330	At1g28080	PubMedID:27117388	MSAD_272284.t1	Medtr7g021270.1			√				√	√				√				√	AAGATCCAGTAATGGATGGTAAAAGGTAAGTTAAATTGTAACTATTTGTCTCTAAATGGCCATTTTTCTGATCAATTTTCATTCTCACTGAATAGCGATATTATTATCGATTCTTTACAGTCTGCTGAAAATTTGGAACTTGAATAAGCTGACTGGGGTGATAGGCGTCTTTAATTGCCAAGGAGCAGGAAGCTGGCCAATGAAACCATCCGAAGCCACACCACCGACACACTTAACCATTTCAGGAAAAGTTAAACCACTCGATGTTGAGTTTCTTGAAGAGGTTGCTGGTGAAAATTGGAATGGAGACTGCATACTATATGCCTTCAACGCAGGTTTGAAGTTTAAACTTAGGGCATGTCTGGATTAACTTATTTAAATTTATCTACTTATATAAAC…
MsMYB040	MSAD_233710.t1	Medtr6g477860.1	At1g18330	At3g07320	PubMedID:27117388	MSAD_319193.t1	Medtr7g053500.1			√	√			√	√			√				√		AGATACTAAGAATAAAATGATAGAAATATACATGCCTATGTTTATTACAAGTTAACTAATTTTTATTCTCGGGTAAAAAATGTTATTGCGAATAGAAAAACTTTCTCCAAAAAAAAAGGGTGGGAATAAAGTTTTCATGAAAATGAGAATGAAAGGGTAACTACCTTATTAATCTCCCTATTATTAAGGTTTCTGAGAATTTTATAATGTTAACAAAACATCTTTTTTTTTTTCCTTTCTAAATACCTCTTTTGTTACTTTGATTCTTTGGGCTACGCCAATCTCATTCAAGGTCCCTCCATGAAGTTTCATGTCTATGCGGTTTTGATTCAAGAGATAAAGAAGTTAATAGCGTAGATAATTGTCACTATTTGTCACGCTCTTCGCGAGGAAATCAAT…
MsMYB040	MSAD_233710.t1	Medtr6g477860.1	At1g18330	At1g61360	PubMedID:27117388	MSAD_295662.t1	Medtr7g056430.1	√		√				√	√		√	√				√		TTAGTAAGAGTGTGTTAATCAAATACTAAATAGAAGATGGAGATGTCCATTGTTGTATAGTTACTTACGGTTGTCAAACATTTTACATGTTATAATCAAATATATTTATTTTTCTGAAGTTTAAATATACAATGAAAAAGCAACATACTATCTCCGATCACATTTATAAATAAAAAACAATAATTTAATCTTTTTTTTTTAACAAAACTGTTTTTTTTTGTAACAAAACTGTTTAGACTTATATATAAACTGAATACATTTATTCAACAAATCTAATAAAAATAATTCTTTCTATAAATGTGATCAGATGAAGTATTTTTAGCTTAAAGTTCTTGCTTTACGGATTGAATTTAGACTATTTGCCTTAAATCCAAATTCATATTCAACCATGTCTATCAA…
MsMYB040	MSAD_233710.t1	Medtr6g477860.1	At1g18330	At5g01200	PubMedID:27117388	MSAD_267527.t1	Medtr7g067080.1	√		√		√		√	√		√					√		CACATGGATACTAAACTCTCATGGGCCGAAGGAGCTAATCCAGACGAACTCGATGAAGAGTTTGATACATTTCCAAGTTCTAAACCTCATGATGTGGTGAGAATGAGGTATGATAGGCTTAGAAGTGTTGCGGGAAGGATTCAAACGGTTGTTGGAGACATAGCTACACAAGGAGAGAGGTTTCATTCTCTACTGAGCTGGAGAGATACAAGAGCAACTAGTCTCTTTATAGTGTTCAGCTTGTGTTCTGCAGTTATTCTCTATGCAACACCACCAAGAGTGGTGGCTTTGGTAACTGGTTTGTACTTTCTTCGGCATCCGAAGTTTCGGAGCAAGATGCCTTCTGTGCCAAGCAATTTCTTCAAGAGATTACCAGCTCAAACAGATAGCATGCTGTGA…
MsMYB040	MSAD_233710.t1	Medtr6g477860.1	At1g18330	At4g27820	PubMedID:27117388	MSAD_217355.t1	Medtr7g068910.1			√			√	√	√				√			√		TTGGTGCTCTGTCTGTCCCTTTTCTACTTCTGTGGTTGAGCTTTATTTCATTTTTCATTCATTTCAAAGTGCTGTTGCTTTCAACTCTCCATTGAAAGTGATAGACGTTCATTGTTTTCTCTTCACCTCCTTGGCCTTTATTACTGATGATCGCTTCCTATGTTCTCTGTTTTTAACGTGGTTCAACTATTAGATAAATTGCAAATAAATTAATGTTTCGTAAATAAACATCAATAAGAGTAACATGGAGCATCATTGAAGTCAATTTTGCTATCATGTGTGTGTAATTTGATATAGAGGATTCTTCTAACGACACTAGAAGGTTTTTCATGGTCATCATCACTTTTAATAGATTTTTGCAGTACTAAAATAGACTAATGAAAACGGACTACACTATAA…
MsMYB040	MSAD_233710.t1	Medtr6g477860.1	At1g18330	At3g51660	PubMedID:27117388	MSAD_311537.t1	Medtr7g070250.1		√	√	√		√	√	√	√					√			TTGTTTTGTATAAATAAGTTGTTTTGAAAAAAGAGATTGTAATAAGTTGTTTTGCATTAATAAGCTGTTTTGAATAAGTTATTTTTTTTTAAAAAAAAAAAAGATCGTAATAATTTGTTTTTCATGAGATAAGCTATTTTTTAAAAAGAGACCGTAATAAGTTGTTTTTTATAAAGTGATTGTAATAAGTTTTTTTTTATTCTATATATAATTTGTTTTTCATGAGATAAGCTCTTTTGAATAAATTAGAAGATAAATTACAAAGTATAACATAATGTATTAATTTTAAGAGAAAAAAGGGTAAAATAGGAAAATTATAACATAAGCCCTTCATCTTCTTTCCTTGTTGGTGTTTTAACTCCCAAACAAGGGGAAGGTTTTCCTCCTTTCTCCCTTCCT…
MsMYB040	MSAD_233710.t1	Medtr6g477860.1	At1g18330	At1g28050	PubMedID:27117388	MSAD_239574.t1	Medtr7g083540.1			√	√			√	√				√					CTCTTTTTGAAAAAAATAGTCAAATAGTTAAAAATGTTTAAAGGTGGACCACCTTTAAACATGGTTCACCTTAGACATTTGATGTTAAAAACTAACGGAGAAGACCAAAACAGTAAACGGCAGAATATTTATGGGACCAAATTGAGATGCTTTATAGTTAGGGAACCAAAGTGAAAACTAAAAATAAATTAAGAGACTAAATGATGTATTAAGCCTTTCTCAATTTGGAGTTTGCTTCGATAGATATGCATGTTGAGTTGCAACTCAAAATATTGAGTCTCTTCAATATGTCGATGATGTACTTATTTTGATGAACTATCATTCCCTTTCTACTATTAGTAAATTCAAGGCCAAGAAAGTATGTTAATCCTCCTAGGTTAGTCATGTAAAACTTTATCT…
MsMYB040	MSAD_233710.t1	Medtr6g477860.1	At1g18330	At5g13870	PubMedID:27117388	MSAD_239681.t1	Medtr7g084770.1			√					√	√		√		√		√		ATCTTCAAGCTGCAAGTTTAATGGTTATGAAAAGAGGTTGAAGATGATTAAAAAATGTAACCTTCAAATACATCCCTACGTCATATTAAAAACCCTAAAATAAGTCCTTGAATATTTTAATCATATATCAAATTGATCCTTGAAATTACAGAACACATAAATTGAAACTGAAATATTACATAGGCAAAAGTCATAGGTAATAAGTCATAAGTCTGAAACTGCATATATTCGTATTGCAGCCTCCGATTCTCATTTCGCACTAAATCACCACCATGATGCAGTATTAGTGTGATATGATCTTCCATCCTACAGATTTCGGCTAGCTTGGTTTTAATCACAAACAAAACAACAACAAAATACAAACGTGTAATTTCCTTCATTACAAAGTTAAATGTTAAT…
MsMYB040	MSAD_233710.t1	Medtr6g477860.1	At1g18330	At1g09230	PubMedID:27117388	MSAD_239723.t1	Medtr7g085290.1			√		√	√	√	√			√	√		√		√	GGATCTGTGCCTCCAACTAGGTCAGCTGATCCACCGTCTCCATCAAATACTGTCGGATCTGACCAGGTTTACAATATTTCTGATTTACTTTATTCAGATAATTTACTCAATAGGCCTTTAAAAAGAATAGTATTTTATGACTTATCTCCTTTAGATGCGTTATTTGACAGCCAAATAAGGGTCCGATTCTTTATATTTGTACATTTTAAGATAAAATGGTCCATTCCTTTATGTTTGTGCATTTTATTTGTTTTTGGCTGACATGGTTGACAAGGTTGTTTATGTTCATCATTGTTGCAATGAAATATTCTCTTCACAAAATTTCAAACCAAGTTATATTTTTATTGATGTCCTTTTTGCAAGAAAAAACCATTTCCATTAGGTTTAAATTTCTTTCTA…
MsMYB040	MSAD_233710.t1	Medtr6g477860.1	At1g18330	At5g17850	PubMedID:27117388	MSAD_289498.t1	Medtr7g086690.1		√					√					√					CTTCCTTTTAAAATTGTTCATTCTTTTAATTCAGTGAAAGTTAATTCCCGTTCAGCATTTTTTAGTATGAGTTAACCCACGCTCACCTTTTTAAAATTGGATCAATCATTTTTTGAAGTTGGATTCGGTCTTAAAAGTGTCAGCGTGAGTTAACTCACGCTGAAAAATGTCGAGCGTGAGTTAAATCACGCTAAATTAAGATAAAGGTCAATTTTAAAAGGGAGAAGAGCAATTTTCTTTTCATAGAGATGCATACCTCTAAATGAAGTTAGGATTCTCTTTGTTAAATAAAGAGGATCTCGACCCCTCTATGTGCAAGGAGGGCAAGCCTCCATGAAGTGGGTCAAGATTTTTTTTCTATTTATCAAAAGAAATGAGGGTGTCGTTTAGAGATATATA…
MsMYB040	MSAD_233710.t1	Medtr6g477860.1	At1g18330	At3g57520	PubMedID:27117388	MSAD_242252.t1	Medtr7g091880.1		√	√				√	√				√					AGAATGGTGCATAAAGTGTAACGGTCCATTAATTATTTAGGGTCGAAAAACCTAGTCCAAATGGTTGAACTGGTCAAGGAACAAAAAAAAAAAAGAGTTAGTTTTGTTGACCAAGCCATTATCCACACACTCTTGATATAGACACGGTTCCAAAAACTTTTTCATTTAAAATAGTTTTTTTTGAATGAGTTTCTTTTAAATTCACACTCACTGAGATCAAAGAATGGTGCTCTGACTCTTGATAGAGTTGGGCCTCTACCTCCAGATAAATGAAATGGATGATCATGCCAAATATGAATTTTCTCATTGCACAAAAATATAAGCATGTGGTAATTCTACTATCCATAAAAAACAGAGAAATCAAAAACTTATTTTTCTTTACGCGGTGCACCATCACAA…
MsMYB040	MSAD_233710.t1	Medtr6g477860.1	At1g18330	At4g28703	PubMedID:27117388	MSAD_256685.t1	Medtr7g099200.1					√		√					√			√	√	TTGAGCTGATTCTAAAATACCCAAATAGCTCCGGATCTAAGCAAAAACCCAAATCAAACCAACGAGCAAGAGCCACATGAAAGTGAAAAGGCAACCCCCCCCCCCCCCCCCCCTCCCACACACACACTTGTATCATATTCGCTTGAAATCCTTTTGATCGAAACTGGATCTAAATTGAACAACCATGAACAACCCACCACGTCCTTTGCAAAGTCGGCGGCTCAAAAACGGAGACTACAGAGGGTCAAACACAGACGAACAACGACCACCAGTAGGAGAGCAAACAGAATCTGACGGATGTGCGGAGGAAGAGAACCTTTTCACACCACCCAAAACTGAGACCAACATCGCAAAAGGAAAGTTTGGATATGGAGGGTTAGAAAAAATTGAGGTTAGGGC…
MsMYB040	MSAD_233710.t1	Medtr6g477860.1	At1g18330	At2g37360	PubMedID:27117388	MSAD_256603.t1	Medtr7g100120.1		√	√				√				√	√					TCCTTCCAGATTACCCAAACGACAAAAAACCAATAACATCTATGAAGCATTAAACTCTATGCGAAAAACCCCTAAACTACCAAACTGATATATGTGCTCTTACACCCTGTCATTGGACGCAATATAGAAACTAAGCCAATTGAAAATATAATACCAAATTCTGCCCAAAAAATTACATTTAACAAAAATATGATCAATATCGTCCAGTTCGCCGCAATTCGCCGTGTAGCTTTGATCATTGTTAGGTATTAAGAGATGTGTATATACGTATTTAATTTGACTTTTCAAATTCAAAGGTAAATTAATTAAATTAGTTACGGTTTGAAGAAAAAATTTATCATATTTTTATTGGTATAGGTTTCGGTATGTTTGTTAAAAAAAAGGTTTGGGTATGTGCAA…
MsMYB040	MSAD_233710.t1	Medtr6g477860.1	At1g18330	At5g03800	PubMedID:27117388	MSAD_262370.t1	Medtr7g103230.1			√							√	√	√					AATAAAAGAAAAGATTGGTCGTGGTTGCATGGCTTTAATTGTCCTACCCAATGCGATATTAGATTTTTGTGATTTAGAAGTGTAACAACGATTAGGGAATCCTTGAATCCTCCCTTCGTCTTGGTTAGAAATTAAATATAGAAATCATTAGTTTATAACATGTCTTATGTTTGGATTTAGGAAAGTAGAACATAACTATGTGATGAATTAGTGGAAGTATTATTTAATGTCCCCACAATTCAACCATTTACAATTGCGGAGTTCTCTTAAGATGAGTTATAACCCTAAATTCATACTTAGATTCAATTATATTAGAAACTAAGAAATTCACTACTCCCTTGCTCCAATGGAATTAGGATCGCCAATCCTAATATGCTCCATCTAAGATATGATATAGAC…
MsMYB040	MSAD_233710.t1	Medtr6g477860.1	At1g18330	At5g22270	PubMedID:27117388	MSAD_285002.t1	Medtr7g105730.1		√	√				√					√					GCAACACTTCGTCTCCTCGAAGGTGAAGATGGTGCGTGCAACTATTCTAACACTCAGATAATTGTTAGAGCGAGAGTAGATGTTTTACAAATGGTGTACCTTCAATCCTGTCTAGAGTAGACAATGATATTTATAGTATAGGTATGGGTATGGGTATGGAGAGTGTAACGTCTTTATTTCTGAAGAGTGGCACATGGAGAGTGCACATTGGAGCTAGGGTTTGCAAGAAACACTAGTTTTTAGGGGATATTGATCATATACTTTAAACCTTCAGTTGTGACGAAAAACGACATATTTGACCTTTACCTAATCCATAAAAGCATCCTTTAAAATGCTAAAAAAAACTTATGTCATCTAGCATATCATATTAAACTTGAGCTTAAAATTTTAAATAAGAAC…
MsMYB040	MSAD_233710.t1	Medtr6g477860.1	At1g18330	At4g02260	PubMedID:27117388	MSAD_285219.t1	Medtr7g108940.1	√	√		√	√		√	√		√		√				√	GGTTTTGCATCTTTGATTAATTCACACCTACAACTACAGCCTTTACATATATAGTTGGTGTGCTTTCACCATCAAAACAAAGCATAAAAAAGAAAGATAAGTTTCCTTTTACATAATCAATTCCGATCACTTAATCACATAATTTGTAGGCTATAACAAGTCGTTGAAAAAGCAAACCGCAGCTATATATAGGCCCAGCCGTGAATCGATAGTGATCTCACCTTCACCCACTTCTTTCACCTCTAAACGACTTCCCCTTATTTTCTCCTTCGCACTTAGAATTCAATATTTAGAGTGTGACACAAAAGAGACGATTAATCTCAAATATGCTTTAATACAATCTTAAAATTTGATTTCGACCTAACTCAACATTTATAAAACTAATTTGTAAGATAATAT…
MsMYB040	MSAD_233710.t1	Medtr6g477860.1	At1g18330	At5g27930	PubMedID:27117388	MSAD_223520.t1	Medtr7g112490.1	√		√	√	√												GTGCTGGTCTCAGGATGCCACCTCTCGCATAAAGTCATCAGCAGGGCATGAGGCACGGTGGAGTACCCCAAGTAATGTAACCCGCTCTGCCTAAGCGGATCCCAAAACCAATTCTCATTCTTGTTTGGGCGTCCGAGAGTGAGGATCTTAGCCCCATGATTAATTGGTTTAACCACACGGAGTTTACGAACCTGAAATAATAAAAAAAATATATAGTTTAAACAAACACACATATGAAGAAAACAATTAAACATAAAAAATAGAATTAAAAAAAAACACATAAAAGTGAATATAATAAATAAACAAACACACATTTAAAGAAAATAATTAAACATAAAGAAAAAGAATTTAAAAAAAACATATAAAAGTGGATATAAAAATTAAACAAACACACATTTA…
MsMYB040	MSAD_233710.t1	Medtr6g477860.1	At1g18330	At3g04910	PubMedID:27117388	MSAD_244382.t1	Medtr7g114680.1				√		√	√	√					√				TGACAACAACGTTTGGATTTTGGAGGAGAAGAAAGGATCGAGCGGCAGAGAGGCTAAGGATCAAAGGTTTTTCTAGAGAGAGGAGAGGAGAGGAACGGAGACACTTAATAATTTTATGGGTTAATAGTGTTTTACCTCCCTGTAATGTAGGTCATTTCTGGGTTTGCCCACTGTAAAATTTTTGTTTTGGTTTTTATCCTTGTAATTTTTTTTTTCAGAATAACCCCCTAATAGGCCATTTTTCAGAATTTTTTTTCCAGAAATTTTTGTTTTTGAATGGCCTATTAGGGGATATTCTGGAAAAATTAATTTTACAAGGACGAAAATCAAAAACAAAAATTTTATAGAGGGCAAACCCAGAAGTGACCTATATTACACGGGGTAAAACATTGTTAACCC…
MsMYB040	MSAD_233710.t1	Medtr6g477860.1	At1g18330	At2g46830	PubMedID:27117388	MSAD_269427.t1	Medtr7g118330.2	√		√	√			√	√								√	ACCCCACAAATAAATTGCTCATTTTCATTAGTTGGTGGGTAAATTACCCACCATTCTTCAAAGGTAATTTAGAAAAAAAAACCTTAAAATAATAGAGGTTGAATAAAAATTTGCTTGAAAACGAATAACATCCCAAAACTAAAATTTAAGACACAGAATTAAACAAATGACAACAAAAAAACTAACAAAACAAATCGTCATAATGTTGGGAATTTCGTGGGAACCTTTGTTGGGTTGTATCATAACATTAGGCTAAAAGCAAGCACACAAGTGAGATTGACATCACAACTTCACCCAAAATCTTAAGTCATTAGATATATGAGTCATCTCACTTATATGTTGCTCAACATCTACTATTGCATTCAATGTGTTATTTTAACTCACACTTGACACATTAAC…
MsMYB040	MSAD_233710.t1	Medtr6g477860.1	At1g18330	At5g13170	PubMedID:27117388	MSAD_324110.t1	Medtr7g405710.1				√			√	√				√		√			CCCCGTAGGTTGGTTGGATGCTGGCGCGGGCAGCCATTCTGTAACTTCTTGATGGTGTGTCTGGTAATAGCTTTTGTTCTGCCATGGTTCTTTCGTGTGAAGATGTTCTAGCTATGGATTCAAAAACTATCCTGCCTTGTCTATATGATGAATACATTATTGGTTCATGGTACATACTTTTATTTAAAGAGGTGGCATTGCTTAATTAACCATGTGCAAGAAAATTAACAGGCTTGGCAAGTTACGGCCATATTGTTTCCTTATTGAAAAATTCTTTGGATTGGAGTGCTTAATGTGTTCTGAGTATAGATTGATACAATAGGATTACCTTTTCTCTTAGGGATAAGAGAAAAATAAGATATTTTGCTTGTGACACAGGTGTTGTATAGAAACGATGCA…
MsMYB040	MSAD_233710.t1	Medtr6g477860.1	At1g18330	At3g13960	PubMedID:27117388	MSAD_325768.t1	Medtr8g020560.1						√	√	√							√		AATTTTCTATGACACAGGCCTGTTGTACGAGATCTTGTTGATGACATAATAACTGTGGAAGATAGTGAAATTGTGAAAGCCATGAAACTATGTTTTGAAATTCTAAAGATTGTTGTTGAACCAAGTGGAGCAATCGGCCTTGCTGCTGTCTTATCAAAAACTTTTCAGAAAAATGATGCTTGGAAGGATAGCAAGCATATAGGAATAGTAATTTCAGGTGGCAATGTTGATATGGCAGTGCTTTGGAATTATTTGAACAAATCAAAATGACTTTTCGTTATTATTCAATTACTGATGTAAAAGTTTGTGTGGATTAATATCTCAATGCTACTAGCATTTACTAATTTAAAATAAAATATATTTGAATTAATTCGAAATTTATACAACTTGAGTATTTTA…
MsMYB040	MSAD_233710.t1	Medtr6g477860.1	At1g18330	At1g78400	PubMedID:27117388	MSAD_263794.t1	Medtr8g030930.1			√	√			√										TATGTTTCTAACAATGGATTATTTTCCAAACTCTTTCAATTTTATTTTTATGACAAAATCTTTCAATTTATTTTATAACAATGTTTTATATAATCAGGTCTTTACATAATTTATATTTATAAAGAAAATTATTTTATTTCATTTATGATAATTTGTAATAAAATCTCAAAGATTTATAAAAAGTATTTTAACAAACAAATTTCAACTTAAAAATACTAATTTTTGTCAAAAAAAAAACTTAAAAATACTAATTAAGTTGCAAAAAATAATAAATACCAAACAACTTAACTTAAAAGTTTTAATTTTCAACTTTATTCTAAAAGTAACTTTTAGACCTAAAAAAAGTAGGGCCAAACCACTTTTATTTGATTTCCTTCTTTAAAAAAAAAGATACTTCTA…
MsMYB040	MSAD_233710.t1	Medtr6g477860.1	At1g18330	At4g00770	PubMedID:27117388	MSAD_210853.t1	Medtr8g032770.1	√	√			√		√	√				√					CGTTTGTTTTCACATCAAAACTCCAAACAAACAAACATTTCCAAAACAGGACATAAAATAAGACCACGTGTCCGATCTAAATCTTCAATATCTTCTTCATTGCAATGTCCACCCGTGGCCACCCTTCTTTTGATCTTATCCACGTCATCATCAAACCATTGCCAACCTGGAAATATCTCCCTCCACGTGGCACATTTGGAACATTCAACACCTCCACTTCATCCACGTCACCAATCCTGCACCCACTCAATATCTCTCTCCTCTAACTTTCGCATTATCTTCTCCTAAGCTCAAGATTTTTTTTCTTTCCTTTTTCCATTTTTGTCAAACTATTTTCTTAATTCTGTTCAGTACCATAATTCAATTACCGATTATTATTATTATTATGATGTAGTAATA…
MsMYB040	MSAD_233710.t1	Medtr6g477860.1	At1g18330	At2g45660	PubMedID:27117388	MSAD_250872.t1	Medtr8g033250.1	√		√	√			√	√			√	√		√	√		AGCTTTGCACATCAATTTTGTTGTTTCCAAAACAATCTTAACTTTCGTAAAGCCTAACCCTTCCGCCAGTGACTAAGCCTCCACCATCCGCCTTGCAACATTTGCGAAATTAAAGTTTTGATTTTTGTGTTTAAAATAAGATTTGAAGTGAATATAACATTAATTCACGATATTTGGAGATATATTTTAGTAGATTTTTTTTATTTAAAGAAGATGATGAAGATTCAAAGGAAAAGATGAAGATGATGAACATCTTCATCATATTTTTGGATTTTTTTTCAGTTTTAATAAAAATATATTTTTAAAAATAAAATTATGTATTTTTTAATAAAAAAAATGCGAAAAAAGATGTATATGTGCTTTTAAGAGAGATAAAAGACCTAAACAGAAAAAAATAAA…
MsMYB040	MSAD_233710.t1	Medtr6g477860.1	At1g18330	At2g02910	PubMedID:27117388	MSAD_257784.t1	Medtr8g055930.1		√					√	√		√		√		√			TCTGGTTTTTTATCACGTTATCAGCACGATCATTTCATCGGAAGCGCTTACTATTGCTTGATATAATAATGTCCAACGTTAAGCGTCAATTCAAAATTGCAAACATAACTGAGGACAACTATATAACTTGGAACAACAACTTGATCGAGTATCTTGCATGTGAGAGACTCGACAAAATTTTCGAAGGAGACAATTCAAGAAAGTCAACAGTTGACCAAGAGGAAATGTCAATGATAATATTTTAATAGAAGTGTCACTTAGTTCAGTGGTTGTGTTGGTTGATTTTTTTTTCATGCTCATAAGTTTAGCTTTTAGACTTCACATTTTTTAATTGCATGTTCATTATTTTAAATGAAACTTTATAAAAATGAAAAAGAATAGGTTTAATGGGGTTTGAAC…
MsMYB040	MSAD_233710.t1	Medtr6g477860.1	At1g18330	At5g66320	PubMedID:27117388	MSAD_272473.t1	Medtr8g076340.1				√				√			√	√	√		√		AGTTCTTCTGCGAATGGTGAGCGCGTTACACGTGCTCCTGTTCCGGGGAAGGCCACAATACTTGCTTTAGGGAAGGCTTTCCCTAGTCAAGTCCTTCCTCAAGAGTGTTTGGTTGAAGGGTACATTCGTGACACTAAGTGTGAAGATGATTATGTTAAGGAGAAATTGACGCGTCTTTGTAAGTCAAATTGATTCTTTACTCTCTTATTTATTAATCTAAAAAACTATAGTAAAAAAGATTACTAATCTAAATTGCAATACTTAATGTTTATTCGTATGATCATTTTTAGGCAAAAACACAACTGTGAAAACAAGATACACGGTGATGTCAAAGGAGATCCTAGACGAATATCCAGAGTTATTCATAGAAGGAACACCAACAATAAGACAAAAGCTAGA…
MsMYB040	MSAD_233710.t1	Medtr6g477860.1	At1g18330	At5g08480	PubMedID:27117388	MSAD_248367.t1	Medtr8g095470.1	√		√	√			√					√		√			AATGTCATATAAGTGTTAAACTTCGATTATTTTACATATTTATATACAACACTTATTAACTTATTCAACGAATAATATCCAACAAAACCCCATAAAAAACATGTAAATATAAATTTTGTATGTTTATAATACAAGTTAAAGTTTGCATGATTACCAGACAACATTTATAGGATTAAAGCAGAGAGATGAAAATTATATTACGAGTATATACCCGTTGTATATTGTTTTCAATCAATTTCATGCCTTAACAAATAAATTAACGACGAGACTTGAACATGTCTTTATTTTGAATACAACTAGTAAAAATTTGCGGTAAAATAATGTTGTAAAGTCTACTGTACATTCTTTTGTAATTCAATTACAGTTTAATTACAACTAGCAATAACAATAGATAGATTA…
MsMYB040	MSAD_233710.t1	Medtr6g477860.1	At1g18330	At5g33340	PubMedID:27117388	MSAD_278234.t1	Medtr8g096990.1			√						√	√	√	√			√		TATAAATATATATATCAGAAAGAATTACTGATCCTTCAAATTCTCGTACCACAATTATTATTATTCCAATTTTTATTTATTTATTTTGTATTTGAGATACAACACAACTTTTGCTATTTCCCTCATATATCATATGAAGTTCATCTAACAAGTTACTCACACCAATTGTGTTTTATTAGTTTAATTTGTATCTAATTAATGTTTATCTCTATATTAAGCATGTTGCACAAATTGAAAGGAAAAAAAATTGATGAACAAACTCTGTTTGAAATTTATAACACAAACAAGGCTTTTAGACAGGCTAATAGGTCAAGCTAGGCTTTTGAAAAGGTCAGGCCAGGCTTAAAATAAAGTCTTTGATAGGTAAAACGCCAAGGCTTAGACCTTAGTTTTTTCAAT…
MsMYB040	MSAD_233710.t1	Medtr6g477860.1	At1g18330	At2g19580	PubMedID:27117388	MSAD_331468.t1	Medtr8g101600.1	√		√	√			√	√				√				√	TGTGATTTTTAGGATGAAATATACTTGAGGTTGTACTCGAGCGTGCTGTAATATGTTAGTTATAGTCGTAGGAAATCTTAGACGTTGTTTGGGGACAGGACGTAGGTCTCAAGTGTTTGGTGATTGAACTAGGATAAATCAAACTGCACTATGCTCTAACATTTATCTCTTATTTACTAAATTCTTGTTTTGAATTTTACGTATATATTTGTTTGTGAAAGTTGTGGTTTTTTGAGTACCTATTGTTATCATTAGTTCAGTCATTTCTTCAAATTAATAGTTTTTAATTTTCTAACACGAGTATCCTTCACATATTTTGGGAATACAGCATTGAGAGAAATTGACTAAAATGAAGATAAACAGAACATGCTATAAATAATAAAAATGTGGAGAAGGTGA…
MsMYB040	MSAD_233710.t1	Medtr6g477860.1	At1g18330	At1g67970	PubMedID:27117388	MSAD_246859.t1	Medtr8g105780.2				√		√	√	√			√						TGGCATTCATGCGAAGGATAGTGATGCATATCATGGAGATACTAAGTTATTTTTTTCTTTGACAAAATTATATAGCTAAGCTAGCACATTACATAATTAAAATAAATATGAATGAAAGAGAAGAAGAGAGTGGAGGAGCACATGGGTGGGTGTTAGGTTCAAGGAATTCATGTGAGCACATGTGCTTTCTCCCTTTTGTTTTGTGTTTTGTGGGACCATTTTTTATGCCCTCACATCTCAACTCCACAACAGCTCATAAATCAGTAGTACTACTCCTAACGGGGTTATATTTTTCAGTCAGATTTTTTAGACTTTATATTATCGTACTTTCACTTTAATTTATTTACCTCTTCATGTATCTATCCACCATTCTACATGCGCGTTTGCTTCTCATCTATC…
MsMYB040	MSAD_233710.t1	Medtr6g477860.1	At1g18330	At4g03510	PubMedID:27117388	MSAD_294285.t1	Medtr8g465910.1		√	√		√	√	√	√			√	√	√		√		CAGTTTGTCAAGTGCATTGCGAGGCTAAACAATGTGTTGATCTGTTGACAAATCTCATACATTCTTCATTGTATTTTAATTATATTTATGTTTGCAATGTTTTTCGTTCGACTTTGAAACTTCTACCAGAAGATGATGTAAGATGTAATAGTTTGTCTCATTTAATTTCGTAATTTTTTTTTTCTTATAAAAAAACCATCTCCATAAAATTCTATGTGAAATGATATTAATTGTGTGCGCAAATAAGTTTTAGATCAGTAGCGTGTAACTTTTTTTTTTTGAAGAAAACAATTCTTTTAAAAAAATTAACTTAATTGATAGTGACAATATATTGCAATAGAAAGGGACATGGTTGTCCCCGTGAGCATAACTCAGTTGGCAGGGACAATGCATTATTAT…
MsMYB041	MSAD_234746.t1	Medtr1g111830.1	At5g04760	At4g31510	PubMedID:27117388	MSAD_284483.t1	Medtr1g009640.1	√		√	√	√		√	√			√	√					TTTACTTGTGCAAGAGTTGGTTAATTTACTTTATTCCTCATTGCAGATATTTTGCCAGTTTCATTTTTATACATTAATCAACTTAGTGCTTAAAGTTATGCTTCTTCTAATCATCTATAATTGTTTAGGCTTTAGATACACCACTTTAACTACCACACACATAAGTCCTCTCTATTTAGCAGGTTTTTTATGAGTTTGATTTTAAAATAAGGAAAATAATCAGATTCTCAACACAGATATTATCATTAGTACGTCATCAGGATGTATTAATTAACCTCCAAAAACAAAGTAGATTTTGAGTTCTCTAATTCAACTTGTTTTTCAGGTTGAAATGGTAATTATACAAGGAAATTGTTCATACATTTATATGCATGTTTTCCTTGCTTTTAAAAGATAGTC…
MsMYB041	MSAD_234746.t1	Medtr1g111830.1	At5g04760	At2g06520	PubMedID:27117388	MSAD_300801.t1	Medtr1g015290.1	√						√	√		√	√					√	AATCAAAAACTCCAAAAAATTCATCAAACTCGTAGGCAAACGTAAATCTTCATCATACAAGCCTAGAAAATCAAATTTCTTTGAAAAAAATCTCATAAAAAATGATAAGATATTGTCATTTTATAATATAAAGGACTAAATCGTAACAAAAAAAAGATAAAGGATGAAAGTGTTACCTAAAATAAAGTTAAGGGACTAATTGTGTAATTTTGCCTTAATTATATGAATGATAGTATTAGGGAGATTGATTGGTACCAAATACGGTTGGAACCTTGAGACTTCTATTGGATGTCAAAGATTTTAATGATCAGGTGGGTTAACCAAAATAAGTGATTGATTGTTTCTAAAAAGCTTAGAAAAATTATTTCAGTTTACCAGTCTACAGATTTGATTTGTAAC…
MsMYB041	MSAD_234746.t1	Medtr1g111830.1	At5g04760	At5g50960	PubMedID:27117388	MSAD_300705.t1	Medtr1g016110.1						√	√	√		√		√					TGATGGCTTCTTGATGGATCCATCCACAAATCCATCCTTGTTCTTGGTGGTGAGAGCCATGAGCATGGCATGGCTCCAAAGAGGATAATTGCTCTGTGACAATTGTTGAGTCACAAGAACCAAACCTGGTTGGTCTGAGTGATGGAGATATAGTGGATCGCTTGGATCATCATATTTGTTGGTAAGGCTCTTATTTGTAGAGGCTTTGGGTGTTTCTAAGGTTTCATCATGTTCTACCATGATAGAAACTATGGAAAAAAATGGGTATTTGAGCTATAGAGGTTTGAGTGCTCTTGATACCATGTAAAAGAAGATAATTGCTTCTGTTGTTATTGATTCTATGGAGTATACAGATGTTATCCTTTATACATGTGGGAATGATAATGTGCTTATTAGCAC…
MsMYB041	MSAD_234746.t1	Medtr1g111830.1	At5g04760	At1g64520	PubMedID:27117388	MSAD_270866.t1	Medtr1g016750.1					√	√	√	√			√				√		AACACATCCTAAATGCCATGATATTCTTGACTTATCTAACTTAAAAAATGCAATAAAAGAATTGAGCACACAACGTGAGATATATTGTGAATGATACCTTTATCTAAAACTAAAAAGATCAAAGCTCAACTGAATGTCGAGGTTCATAGTGAATTTAACATGATCAGATAAATATGAGGCAAAAGTCTTAGTACATGTTTGGCATTACAGTGAATTGGACAAAATCACGGTGGCAATGTGATTTTGTTGAAGCTAAAACGTGTATGTTTTGCAAAATCATTGTGCCTAATTTAAGCTTAAAAAAATCTTCGTCATAGATCGTAAAATTTGAAAATTGAAATGGAACTTGGTTAATAATTTAATATGAATGAAAGTTTGCAGTTTCGATTGTGATAAAAA…
MsMYB041	MSAD_234746.t1	Medtr1g111830.1	At5g04760	At3g10650	PubMedID:27117388	MSAD_272710.t1	Medtr1g040610.1	√	√						√		√		√					ATCTAAAAAAAAACCACTCACAACACTAGATTATATTGTCGCTATCTTCCATCATCATCTCTCTCCCTCATCCCCACCAACCCACCACCAGCAACACAACAGTGCAACACCATCAAAACAACCGTACAGCCAAATGAAAATCAAACAACTCAAACAAAATCAGATTAAAAACATTCCATAAAGCATATTCCATAAAATCCATTCAAAACATTCCTTAATAATGTTCTTTTAGTCAGATTTTTATTTTTAGATTTAATTAAGGTTAAGATATAATGTTATTTAGTTTAGTGATTCCAATAGTGTGTTACCGACTGTGATTGAATTATGGACCTAGCATTGGTGCTTAGAATTTGGATTATGAGAAGTTATTACTATAGGTTTAAATTTTTAATTTTGAGA…
MsMYB041	MSAD_234746.t1	Medtr1g111830.1	At5g04760	At5g51110	PubMedID:27117388	MSAD_314781.t1	Medtr1g048970.1						√	√	√				√					AGTATTTGTTGCTTTTCTTTAGACACGTTTGGAATCACAATAATCATGACAAAATCATAACCATGATTTTGTTGAATCTCTAAAGTGTAACATTTGTAAAATTGCAGTAAATCGTCGTGATTTTGTCAAATTCACCATCCATACATGAATGAATTTGGTTGGTTGTTACTTGTTCGCTGTGGAGGTTGTGGAATTACATTATTTTTAGAGGTATGGCTTTGGATCACCATTCCTAGTTTAGGAAGAGTCAAAGAAACTTTTTGGGTATGGTTTATTTATAAAGTAGACCGACTAATTTAAAATATGCAGATTGGTGTACTTGCCCTTTAGGATAGGATGTATCCAAGTTTTGTAACTCTATCTTGATGTAGTGGGTTGAATTACTCAAATGTTTGGTGC…
MsMYB041	MSAD_234746.t1	Medtr1g111830.1	At5g04760	At3g12160	PubMedID:27117388	MSAD_297793.t1	Medtr1g052475.1					√	√	√	√				√					TTAAACATCACATATTCCCTAATAATTTTCCAAGGTTGTATAACTGCAGAAAAAAAGCAGATAACACTCTTGAAGGAACAACTTGGCAAATCAAGTTTGAACTAAGTGGTGTGATTCAAGGAGCTACATATAAACTCAGAGTTGCAATTGCATCTGCAACATTAGCTGAATTGCAGGTAAACTCCTGTTGTATGTAACATGATGGTGTTTCACCTTTTGAATTTCGTGCTGACATGTATAAATTGCCTGTGAAGATTCGAGTCAATGATCCCAATGCAAGGCGTCCCGTATTTACCACTGGATTAATAGGAAGGGAGAACTCAATTGCAAGACTAGGAATTCATGGACTCTATTGGCTGTACCATGTGAACATACCAAGTTCTCTTCTTATTGATGGCA…
MsMYB041	MSAD_234746.t1	Medtr1g111830.1	At5g04760	At3g53460	PubMedID:27117388	MSAD_274412.t1	Medtr1g064230.1			√				√					√					ATGAATCTCTTAATAGAAATTTTATCTTTAAATATAAGTTTTTATTTTTATCTTAAACAATAATCACATTACTATTTTATGTAAACTTACTTATTTTAATACTTAAATCAATATATATTATAAAGAGTAAAGACATTTATTAACCTTCTTCTTCGAACGATGTACTCATAGCATTTGTTAGCATTTTCAAAAAACAAATACTTGCTTGCCTTATGAGTTTTGATCGGTGATAGTGATGCAGAGAGTTGTGCTGCTTCCTAGGTATTTGCTTTACTTGTGACAACAATAGTATGAAGAGGCATGATCCTTGCTAGTCTTTGATGACTCACCTGCTCATGTTAGCATGTCTCAATATGTCATCATAGGACTTTAATTTTATTTTTTTTCCTTTTCAATTGA…
MsMYB041	MSAD_234746.t1	Medtr1g111830.1	At5g04760	At1g09900	PubMedID:27117388	MSAD_258079.t1	Medtr1g080110.1			√		√			√									TAAACACCAGTAAACAATAAAACACAACTTTTGGTGCATATGATATGCTCAATAATTAAAAATCCGAACCAAAAAAGTATAGGAGTATGTGTACAAGAGTGAGATAGCCTTTGAAATCATTATGCACTTCACAATATAAAAAGCATAAAACGGGACCTCTCACCTTAGTGTGCTATAGTTTTCTTCAAGTTAGGAAAAGAAGACTCAAATAAACACTGAAATCAGGACTCGTAATCATCGTCATTTGTTTTGTTGATAAAATAGTTACTACAGCTCATCATATCATTATAAAAAATAAAATTAGAATCATTGTGAATGCGTTCAATTATTTAAAAGTAACCATGCATTTATATATACGAACAAGGCATGAGAAAGAGAGATTTTCACGTGTTAGAAGAA…
MsMYB041	MSAD_234746.t1	Medtr1g111830.1	At5g04760	At2g47480	PubMedID:27117388	MSAD_311368.t1	Medtr1g087730.1	√		√	√			√	√			√						GATAAAATATTTATTCAACCAAAGTACCAAAAATCAATTTATTAGATCCCAAATAGTTTTATTTACCTTGATGTGTAACTGGAGGACACGCCTAATCCTTTGAACACATTGTTCTTCCTCTTTGGGCATATTTTTGTTCATTTTTTTGATCAAGGTGCAGAAGTAATAAAGCAAAACATCTTTGGTCCTCAACATGCTATGAATTTTGTAAAAGTTTTAAATTATGTTATATACAATATACATACGCCTATGGTAATATTAAACGGTTTGTTGTTATGCTTTAGCTTTTGTAAATAGTAGTATAATGTTTATAACATTATGCAATGTGTTTTTTTTTTTTTTTTAAGGAAACATTATGCAATGTGTTATAAACCTAAATCATTCCATTTCTGTCTTTAA…
MsMYB041	MSAD_234746.t1	Medtr1g111830.1	At5g04760	At4g03115	PubMedID:27117388	MSAD_264103.t1	Medtr1g088995.1			√				√	√				√	√				CAAAACAGTAAAACAATAAAAAATAGAAAATAAACAAATAAAAGAAAAGATAATGTGGTTGAAAGTGGTTTTTTATGGGAGGAAGAGGTAGATGAAAATAATGAAAAACAATTTGTCTATATATAGGAAAAAAAATCATGTCATGATCAATTTTGATTGGCTAATGAAAAATAAATGAGTCATTATCCATTTTGATTGGCTAATAAAAAATAAATGAGTCATGATCTATTTTGATTGGTTGATGAAAAATCATTAAATGAGAAGAGAAATTTGAAGATGCCATGTGTACTTTTCAAAAAAATTAAGGCAAATGTTTATAATAGAGATAGAGATAGAGATGGAGATTCATCACCTTATCAATAGCACATAGTCATTTACAAGTTAAAATAGCATAAATCC…
MsMYB041	MSAD_234746.t1	Medtr1g111830.1	At5g04760	At1g14140	PubMedID:27117388	MSAD_313952.t1	Medtr1g090330.1			√	√	√		√	√				√					TTTTAGTTGTTGTTGGCCACGGGGTAGGTAATAGAATGATTCAAGAAAGGTTTCAACACTCGGGTGAGACTGTTAGTAGATATTTTCATCGAGTACTTCATGTCGTCCTTAAGTTGTCTATCAAATATATTAAACCCGAAGATCCTACGTTTCATGATTGTCATTCCAAAATAAAAAATGATCAACGATACTGGCCCTTTTTTAAGAATGCTATAGGAGCAATTGATGGTACACATGTGTCATGCGTAGTTAGTGGCAGTGAGCAAACAAGGTTTATTGGAAGAAAGGGATATCCTACACAAAATGTAATGGCCGTATGTGATTGGAATATGTGTTTCACTTTTGTATTTGCTGGTTGGGAAGGTACTGCTCATGATGCTCGTGTTTTTGACCAAGCTT…
MsMYB041	MSAD_234746.t1	Medtr1g111830.1	At5g04760	At1g08180	PubMedID:27117388	MSAD_313884.t1	Medtr1g090837.1				√			√	√		√	√				√	√	TCTGGTGTCGTTGTTCGTATCCATACTTCTTAATCAACGGTCCTCTCTTAATGGTCTCTCAGATGGTGGTTTGAATGTAACAAAAAACAAAAGATGGTGGTTTGAAGCTTTTTAGTGTTTCTGTTTTTAGTTGTTGGTAAGATGAGTGTGATTATGGTTTAACAATTTTGAATTGTTTAAATGATTTTAACACTTTCATTTCACTGTATTTTGTTAGATATTGGATGGAGATCATGGGAGCAGTTTATCAATTGTATACATGCAGAACGACATGGGAAGAAGCTTAACGGCAGAGGATGTTATTTCTTATTTTTCCTTTATTTAATAATAATTAATAAAAACCACAGTTCTCTTTATATAAAAAAAAAAAAAAACTACACTATCACAGTTTGTATAAGC…
MsMYB041	MSAD_234746.t1	Medtr1g111830.1	At5g04760	At3g25790	PubMedID:27117388	MSAD_274693.t1	Medtr1g093080.1			√				√	√		√	√						TAGAGATGAAAATAATTAATTATAAATTTTACATAATAATATTAATAGTAAATTAAAATATATATTTTTTGGAAGAAAAAATAACAGTTTATAATATATTATTTTCTGCAGTATATTATACAACTAATAGATGATTATTAAACATAATTAAAGGTAATGTTAAATTATATCTCTATATATGCATACATATGAGAGATTGATCAATGAGTGGGAGATCAGGGCTATTAGACAAAATTCAAGAACTACAATAAATAAAGATAAAGGTGTAAAACGAATTATAATAGATGATACTCTTCATCATATAAACTAGTTCCAATTTGTCCATATAATTAAGTTTGGATTGATTCAAGTGACATGCAGACTACCTACCTTGTTTAGAGTCCCGTAATGTGAGTGAAA…
MsMYB041	MSAD_234746.t1	Medtr1g111830.1	At5g04760	At1g22700	PubMedID:27117388	MSAD_225310.t1	Medtr1g096230.1	√	√					√	√			√	√					TAGTGTAATGTACCGTGGTTAACGTCACATTAATATAATATAAACTACTGATTTGGTCATTAAAATTGTAACACACCTAGTAGAACAGTGAATGTCGGTCACTTTTGTCTTTAACTCAATACAAGCTAGTGTTTTGCTTATTGTGTGGCTCCCGTTTGTGCTCGCAGTTGTTCTTTTCAGCCAACAAGGGGCCAAAATGATTTATTTTTATTTTAAGGAAAAATTGATGACAACGTGTAAGGATTGAAGGACAAGGAAATGATGATGGGTAGATGGGAATGATGATGGGATTGGGAGGGTTAGGATTTCTCCTTAAAATAAATTGATTATAGTTTTTTTTTTCTTGATACTTGTAACATTTTATTAAATATCAAATTACAGATGCATAATGGAACATCA…
MsMYB041	MSAD_234746.t1	Medtr1g111830.1	At5g04760	At4g00350	PubMedID:27117388	MSAD_310105.t1	Medtr1g100180.1			√	√			√	√				√					GACTTGGTTTAGGCTATAAATAGGCTTCCATCTTCAACAAATACCTTCATTCTTCACTTCACCTCTTTTCTTCCATTTTCTTCAAATGTTTTTAGTTTTTTAGGGGTGTCGGTGGTGTCATGGTCATTGTTGACCGTTCATATGAACCCTGCAATTGCAGCATTGCAGCTTGTGTGAGGTTCATATAACGGTCAACAGAGACTCTTGACATCAAAGAAAGACACAAAAAAGCACATAACATCTGGTCCGGATTTCTTTGTCCGGATATCGCTAACAATCTGCTCCAGATTATATAATCCGAACCAAGGGTATTTTTGGAAATTTTGCAGGGCACACGAGAAAGCAGCAGGGTGGGAAAAGTAAAACTCAAAAAAGTATCTAACCTTGTCTGTTTCAATT…
MsMYB041	MSAD_234746.t1	Medtr1g111830.1	At5g04760	At3g06020	PubMedID:27117388	MSAD_322197.t1	Medtr1g105360.1				√			√	√		√	√						GAAATTCTTAATGGATAAAAAAATATTTTCACCGTATACTCATATCACCGGCATAAAAACAACAGATGAAGTGTCCTCGTAAAAACGATATGTTCATAGAAGTTTTAACGAACACAATAACAGTAACATGTTTCAATTCAAAGGGATTAAGACAACTTTCAATAAAATATAGAAGTCAAGAAGCGTCAATTAACCTAAAAGACGAGGTCGTTTAAATTTATAGGCTTAGATTTTCCTGTATAAACCTCTCTTAAAGTTTTCGTAGATTGTCTTAGGATATATTAAGAGATTTCATCATGCAGAATAGTGTATTATATGTTGAATCAGTCCTAATCCTCTACACAAAAGTAGTAATTTTTATACGAACCCTAAAATAGGTTTTCGTTTTTTGGTGTGATT…
MsMYB041	MSAD_234746.t1	Medtr1g111830.1	At5g04760	At5g54770	PubMedID:27117388	MSAD_322184.t1	Medtr1g105480.1		√	√				√	√			√	√	√	√			ATGAGTTAGAACCAACTTCTGATGGTGAGGCTTTGGTGGAAGATCTGAATCACAGTGCTGATTCCACCCAAATCTTGTCAGATAAGGAGTTAAGTCCGGAAAATAGTGTTAGAAAGCTGGATTGTGGTAATATCTTGACATGGAATAACTCTTTTACTATGTTTAATGAGGATTTTCCACTCTTGAATGGTGCAGCCAAAATTTCTGAACAAATAGGTTTGCCACCAATCCTGGCCAAGCAAGCATCCCGGGCAATGTTCAAAAACATGTTGATACTCCTAGCATTGTTTTGGTTACCAAGAAGCAGAGAAATCAAAGCTCCCAAGCTCACACTACATATTCAATTTCAGAGCCAGGCAAAGTGCAAGAGGCTCCTACTGAATCCTGGCCCTCTCAGCC…
MsMYB041	MSAD_234746.t1	Medtr1g111830.1	At5g04760	At1g68530	PubMedID:27117388	MSAD_293510.t1	Medtr1g110930.1							√	√							√		ATATTTCAAAAATCAGTTTTTATTAATTATGTTAAATCGAGTAAAAAGAGGCATGATCTGTGCATAAATGATGGGAATCATGACCCAAAAAATTTTGGGATATTGAAAAAGTTCTTCTTGATTGAGATTATAAATATAATATCCTATTTTAGGATAAAAATTATATGTTTTAACTTAATTTTTATTTTTTTCAACTTCATATCAACAAAATAAATGCTCTTTTAATCTTTTTCCTTTTTTGTAAGAGATCATTTTTTTTTGTTACAACTTGTTGAAAAAGATCATTTATGTTTGGTAGTGGTATTTTCTCTGAATATTTTATTTCTAAAATCATTTTTGTCCTTCCAAAGAATATAACCATTTCAAGTGATTTCTATGATTAAATTTCTTGTAGAGTAA…
MsMYB041	MSAD_234746.t1	Medtr1g111830.1	At5g04760	At1g11440	PubMedID:27117388	MSAD_220851.t1	Medtr2g010980.1			√	√			√	√			√			√	√		AAAATAGTGTTTTTTTTAGAAGCCATGCATCTCAAGTACATGAATTAGGATACTCTCTAGTGAAAAAACTTAAGAAAATAATGTGTTAGATCTAAATCTTAAAATATACAAGGAGCGAATTTTAAAAATTTAAAAGTAGATATCATAAGACTAATTAAAGGTTGAGATTAAAAAAAATGATAGAATTTTTTTAGTTGTGTTATTTGAAAATCTATATATGTGACAACTTTTGTGACAATTAAAATTTTACAAAGGAAATGAGGTATTGATACAAAAATCAAAACAATAAAGAGAGAAAGTAAGAAGGTAATCTGAGTATGATAGAGAAATTTGTCAAAAATGATTGTTCAAATATCATTTCTCATAGAAAAGAGTTAGGAAAAGAGTGTCTATGTATTT…
MsMYB041	MSAD_234746.t1	Medtr1g111830.1	At5g04760	At4g32480	PubMedID:27117388	MSAD_261299.t1	Medtr2g013780.1		√	√		√		√				√					√	TATTAACATATGTCTTGTTAACAAAATTGAATATCGGTCTAGGGTTTAGTCTTACACATCTTCAACAAAACATCTTCATCTTGCTTACACTTGTTTCATTTTCGCGTTGGTTTTTTTACTGTCTAATACTCTATCCATAAAACACTGTCAAAATTAGCAGATGTACGATAAAATTTTCTCTTCAATTTAAACGGTACTTTTATAACACATAAAACACTTGATGTTTTCCTCCGTTTCAACCACCCGTTTGGATTCGATGGTGCATTTGTGTCATTTTGTACTGATTGTAATTCTATATGAAAATTATTCAAACCTAAATTGAAGCAATTAGTCAAAAGTCTAACAATGACATTTCTCAGATCATATGTTATGGTAACCATTGATTGGTCGAGTTAAATT…
MsMYB041	MSAD_234746.t1	Medtr1g111830.1	At5g04760	At4g02510	PubMedID:27117388	MSAD_299443.t1	Medtr2g030160.1	√							√			√	√		√	√	√	TATAATCGTTAATCCTAAAAATCTACCCTTTCAAAAGTTAATCAATTAAAATTTCGTCCCTTAACCCACTTGATGACTGCCACATCACCAGATTAGCCTCATCTCAGACCACTTTGAAAAGACCAATATACCCCTCCTTCATTTCATTTCCCCTGACTTCTATCATTTTCTCTTTCAAAACGGTAATGGCTTCTTTTACCAGATCCAATTGTGTTGCTTTCCGTTCCGCCACTTTCGCCGTTGTCGGTAATCTGGATGTTGATTGTCATGCTGGTTTCAATTTTCCTTCTTTCTTTGATTTTTCTGAGTTGAAAGTGAGAAGGTGATGAATAATCATGATTAGATGATGAAGGAGGAAGGAGGTTATGGAGAGGTTGGTGGTGGTGTCGTGATGCAGAG…
MsMYB041	MSAD_234746.t1	Medtr1g111830.1	At5g04760	At1g30520	PubMedID:27117388	MSAD_299450.t1	Medtr2g030240.1	√					√	√	√									GTGAAGAAAGCTTCAAACATTTTTACTTTTGTTGATATTTTTATCAGCTTCTACAATCTTGACCTTATCGTCTACCCAAAATACGAGTCTTTGATGAAGTGTAGAGGAAGACATCCACTAGTATGTATCCAAAATGTGAGTCTTTGATGAAGTTTAGAGATATTAGCGACATAACATTTACGATTGTGCCCTTATCAACAAAGACTTGGCTAAACATCTTGTTATTGATAGAAGCTTTGGTGAACAAAGGCTTGAGATGTTTAATCATGTCTTGAGCTCATTCGGCGTCCTGACCCCAACACATCACCTTCTAACACCTTTTCGGCTACAAACCATTTTCCCTAAACTCAATAGTATTATCCCAATTGTGTTAGTTTCTACCATGTTGCTATCAGTATC…
MsMYB041	MSAD_234746.t1	Medtr1g111830.1	At5g04760	At4g21180	PubMedID:27117388	MSAD_292057.t1	Medtr2g044580.3			√	√			√	√		√	√						AGTATATGACGTCCCTCTTGTGTGGTAGCGGCATAGCGACGGTTGTGTCACTTTCCGGCGGTGCATGTTTAGTATGTTCATTGAAGATAAATGTTTCCTCACATTTGATGTTTCTCCAATTTTTCTCTCTTTTTTTTTTTTTTTTTTTTTTTAATCTTTATGGTTATGAGAGTGATGTGGTTTGATTTAAGGAAGAAGATGAATGATGTTTTTTTTTTTTATGAACATGATAGCGTAGTGTTGTTTGAAAAATAAAAGTTATATGCTTCTATTTTTCTTCTACATTTTTCATATGTTTTTTCCGTTTCTCCCCCTTCGAATGCCTTGGCTCTTATTTCTTTGTTCTTATTTATACCAAAAAGCTAGGTTAAGGTATGAGAAAAAATACGTAACTTTGTT…
MsMYB041	MSAD_234746.t1	Medtr1g111830.1	At5g04760	At1g16300	PubMedID:27117388	MSAD_323997.t1	Medtr2g065470.1			√		√		√						√				GACTTAACCCATTTCAACCATAATTCAACCACACAATATCCCAATCCAACAATTTGAGCAAAACTCATAAGTATCCATTTTCACCAAACCAACATTCAACAACTTATTTCACAACAACAAATTATGAATCATGCATACCCAAGCCATGAATTAACATCCATAACATCACTTAACAACAATAACATCAATTGATCATGAAACTTATCACAATTCATCAACAACATAGCATAATTCACCAATTGAGCATATTTTCAACACATACCCATGTTTCATACTTTGAACATGTAATTCAACTAACAACAATTCAATTATCCATAACTTCATACATCTAAACATGTCATCATAATTAGAGCACGAATTTCATCATTTATGGACAATTAATCAATTCACCCAATTAAG…
MsMYB041	MSAD_234746.t1	Medtr1g111830.1	At5g04760	At4g27410	PubMedID:27117388	MSAD_300324.t1	Medtr2g079990.1			√	√		√	√				√					√	TTGGGCGTCAACTTTGCAGATCCGTAAGCATGGGTATTTCGGTGAGTTAGGTTTTATCATATTATTTGTAGGCATTTTGCTGTCGTATGCTATTAACTTGGGTGCTTTGAGTTTGTTCGCAGATTCATCCTTTAACGTTTTTAGCGATATTTGTATTTGATATACTCTATCAATTTGAATGAATGAATATCGTTTTAATTTTGTCAAAAAAAAAATCGTGGGAAAGTTCAAGAATATTGAGCATCTTCCAAGAGGGAGATAAAAAACATGAATTGAGTGAAATTTTTATGAGACTTCTAGAGTTAGTCCAAATGTAGTTTAAGTCTGTAACTTGATTATTTTCTCTAAAAATATGATTAACTTAGACAATTCTAAAACAAACAAAAAAAAAAGTTTTCT…
MsMYB041	MSAD_234746.t1	Medtr1g111830.1	At5g04760	At5g54300	PubMedID:27117388	MSAD_294486.t1	Medtr2g080980.1			√	√	√		√	√									CCCGTTCCCAACATGTTTGGGTATCCCTGCCCTATCCCCATCCCCTCATTGTATAATTTTTTTGAATAAAAATAAAAGTTTTTTTCAGTCCCGATTGCAATGTTGTAATGCATTATATAGTAAAGAGATGACGGTGATCAATGTCTATGGTGATGAAAAATAAAGAGACCTAGAGTGTGATATATAGAAGGAGAAAAGAGAGAATTATGATAAGTGAGTGTCATCTGAAAGACCAAGACTCTAACGGGTGTGAGTGAAATGATTTAGGGTTTGAGTTTTTATTTATATAAAAGGGGTAATACATTGATTTTTTACATTTGAGACGGGTTTGGGTATAGGTTCGGGGTGGGTACTTATATCCCTGTTACCCATCTCGTACCCGTGTTTTTTAAATCGGAG…
MsMYB041	MSAD_234746.t1	Medtr1g111830.1	At5g04760	At2g32300	PubMedID:27117388	MSAD_243045.t1	Medtr2g088990.1	√		√				√	√	√		√	√					GGAGTATAATCTCACGACACCACACACCCTTCTTCCTCCTTCCTGTCACACGTTCCATCTTCTCCCAACTAACTTCATCTTCTCTTCCTTTATTCAATCAACATTTTCCAAAACAGATAAACATATTCCTATAGCACTCATTGAATCAAATCCAGGACACATAAACCCTTGTCCCCAATTTATTTTTTTTGTTTTTTATTCCTCATACTAATCATGCAATTTGTTGTTGTGCAGCTGGTTCTCATGATAAACTCAACAAGGAAAATGACTTTGAACCCAAGAAGGAGAAGGATAATGATTTTGGTGCGTGTACTAATTCTCCACATCCTTCTTCCTCCTTTCTGTCATAACCCTTATATCAATAACAACAACAACGAGAAACTCTTGCTTAGTCACAAG…
MsMYB041	MSAD_234746.t1	Medtr1g111830.1	At5g04760	At4g28290	PubMedID:27117388	MSAD_294299.t1	Medtr2g090340.1				√			√					√					ACTCAAAAATGAAAAGAAAAAGAGAGAAAAAAGGGGAAACTAACCAAACGTGTTTGTTATGCTATGACTACGAGTTGTGACAGAGAAACAAGGTTGAGTGGAAGAAGCAAAGATTGAAGCATTAGTTGCAGCCATGTATCACACTTTTTTGGTGATTCCTTAATATTGGATTGAAATAAGGTAAAGAAATAAAGAGAAGAGAGAAAGATCGGTGGCTTAATCTAACAACTAAACATGTCCATAGATAGATATAGTAGTAAACAGATAAAAGGATATTTTTTTCATTAACAAGTGGCAAATGGACAAAACAGAAAAAATATCATCTCAAAACAATAGTCTTCAAGAAAATATCAAAGTAAAAGATAAGGAATGGACTGTATTTGTGGATCTACAAAAATC…
MsMYB041	MSAD_234746.t1	Medtr1g111830.1	At5g04760	At1g03790	PubMedID:27117388	MSAD_265973.t1	Medtr2g090605.1	√	√	√		√		√				√						TTTTTGGTAAAAAATTAGTATTTTTATTAAAAAGACAATTTTAATCACCCTAAAATTCTTATATTGCCTCTTTCATCTTTAACACATTGCCATGTCAACAACGTCTAATCCATGTCAGACCAATAATGGCCACATAAGAGTTTCTGTAGCAGTTGTAAAAAAGGACAATGTTGTGCACATTTTTAGACTTAGCTGGAGAAAATAAAAATAAACGAATAATCTGTTACATAAAGTAACATAAATGGCCGCAGAAGCAATTTTGCCTATCTTTTATCATTTACATGTTCTGTTATTCTAACACATGATGTTAATTGAAATTTATCAGATAAAACAGATGATGATCAAGTTTAGGTCTCAAATCGAAGATGGAAATCTTGAAGGACTCTCTACAACATTGAG…
MsMYB041	MSAD_234746.t1	Medtr1g111830.1	At5g04760	At4g25260	PubMedID:27117388	MSAD_332417.t1	Medtr3g008840.1			√				√										TGATGGGATTATAGCTAAGTGAGTCAAGAATTGATTTTTATAAGATGCATCAAATTATGTTAATGTGTTTTGCATTGCTAAAGAAATGAAGGTGAAATACCAACAATAACAGAGAAGTAATGAATTTTGAGTAAATGATATTTTAATTTGTATCAGCTATATTATATTATAACTCAAATGAGACACATGAATAGTAGTGAATAATATTGAATGCAAAAATGTGTTCACATAAGAGAATGGGAGAGTCCTCTTAAAGGTGTCACATTAGAATATTTATGACCTGGTTCACCGACAATTCTTTTTTAAGCTCATAATAATGAATTAGATTAAGGCCCGTTTGGATAAATAGCTTATATAGATGCTTATAGCATTAGAACTTATAACATTAGAGCTTACATC…
MsMYB041	MSAD_234746.t1	Medtr1g111830.1	At5g04760	At5g37540	PubMedID:27117388	MSAD_234252.t1	Medtr3g065160.1	√	√	√			√	√	√		√	√	√					TTCTTTTTTTTTAATGGCAAATGAATAAGAATAGCCTCAAAATGGTTACTTAAGTTTTGATTTCTGTATCAAAATAATATTTTAGGAATGGCTATTTCAATATAGTGGAACCCATTAATGCAAATAATTGGAGTTTCACGCTAGCATGGTCAAGTTGATTTCACAGTTGTCATGTTCTATGTGAAGCCAAAAAAAATGTCCATTGTCGGTGAGCTTTGCATTTCCAAATTCATTTAGGCCAAAGGCTAAAACAATAGTATGATAATAATTGATGGATAAAATACATCAATTGTTCACCATATAGCTAACAGATGAGGTCTAAACCATTCACCATCGAGCATCATGTCATTGTTTGGTAAAGGACTACATCAGGGTCAAATTTTACATCTTAATTTTCCA…
MsMYB041	MSAD_234746.t1	Medtr1g111830.1	At5g04760	At1g14920	PubMedID:27117388	MSAD_278490.t1	Medtr3g065980.1			√	√			√	√								√	TAACACGCTTTGGTGCTTCAAAGGCCTTATTCACAAATCCAAAAGTAAAACGAGAGAAGATTCTCATCATCTTCAATTCTACTTCAAACACACACAACTTAAGAAAATTCAAACTAACATATAAACCTCCGAGAAGATTGGAATCAAATCCGAAAACGCATCCAAAGCAAAAAAAAAAACTAATCACATAAATTATCCCCAAATAGTGAAAATCATAAAAATTCCACCTTCATACACAACAATAAATACAAAAAACAATCAAATCAATAATGAATCATCAAGAACCCTAACATAAAACGAATCAAATCAGACAAATAAGACAAAATCAAAATGAATCATTTCTCAAATAATTTCACCGCAATAATAAAATAACAGGTAAAGGAAAAGCATTAACCTCTG…
MsMYB041	MSAD_234746.t1	Medtr1g111830.1	At5g04760	At3g07800	PubMedID:27117388	MSAD_281851.t1	Medtr3g083230.1	√		√				√	√			√				√		TTTTCGTCAATCAGATTACCAACCTCCAATCCTACCCCCTCTTATGCAAAATAACATTGTTCCACCACATCAACGCCTTACTCCCCTTCTTTCACTTGACCACCCTCCATATCGCAACTCGCCATTTAAACCATACACTACAAACTCCTTAATCCACATGCAACTTCCAACATTATTTACCTAACATAAAAATGATTTAGCCCTCAAGCTATATGCACCCTTAAACCACGTCTACTCCGACAAGACACACCTTACTCCACTTTATCCAATAAATTTTTCTAGCTTCCTCACCCCTACTTCCATAAAAATCAGTTAAAAAGAACAAAGAATGAAATAAATTACTCCCCACGTTTTATAATGAGTGTCACTTTACATTTTCAATTCAACTTTAATTTATTT…
MsMYB041	MSAD_234746.t1	Medtr1g111830.1	At5g04760	At5g10080	PubMedID:27117388	MSAD_316279.t1	Medtr3g087780.1				√			√	√	√						√		CAGCTTTCACCATTCTATAGTCACTCAGGTTGTTGGATAATATATCAATTTTCATTGGCCAATTACTAAGTTCAAATTTGCATGTTTTGGATAAGAAAAAAAAATATGAATTTTAGGATAAGAAAAAAAAATGAATTTTCAAGTTAGGGGGCATTTTGCACATAACTGTAAAACTTCGGGGGTATTTGCAAAACGTCATGTTGACTAATAGAAAAATTTGACGGAGAGGGTAAATTGATTAACGTTGTACAATTTCAGGGGGTAATTAAAGTTTTGTTAGTTTCAGAAGGATAATTGACGAAACTTATAATTTCAGGGGGATAATTAACGGAAAAACACCTCTCTCCAATAGATACCTTTTTTTTCTTCAAGAATAGAATAGAAGTACTTGTTAGATAC…
MsMYB041	MSAD_234746.t1	Medtr1g111830.1	At5g04760	At3g18660	PubMedID:27117388	MSAD_323268.t1	Medtr3g095910.1			√	√			√		√			√				√	TTGGCTCTACTCTTGAAAGAATAAATCAAATTACAATAACATCACCGACGATTCCTAAAAATAAAATAAAATAACATCACTAACAAAAAATGTAAAAATACTTTGTCAAAAAGAATATATAAAAATACAAAAACAAAATAATAAGAAAAGGGAAAAACAAAAGCCAATAAAGCTCAACATGTTTTTCGAAGAAAGGTGACACTAGTCCTCTCCGTTCAAACTCACGACAAATTCTCACGTGGGAGAGAAGATGCTTCCCTACTATCATGCTCACACTATTTTCAGTGCTCTAGACATCCACATCCTATCCTATATTCAAAATCCACTTAAGAAAAAATAGAGCTATTATACTATTACGTATCTTTAATCAAAATGGTTGTCTACGAATTTTACTCTCAT…
MsMYB041	MSAD_234746.t1	Medtr1g111830.1	At5g04760	At3g50030	PubMedID:27117388	MSAD_222163.t1	Medtr3g102680.1			√	√			√	√		√		√	√				TTGATTTTTTCTAAGGTTTCCATCTCAACCATGAATTCTCTACCACCTTGGCAACTCAGTCGAATGAGCTTCTTTATCACGACACATGTTCCGTTTTTGAGTGTGGCCTTAGACACTTCACCAAAACCAACACAACCAATGAGGCTTGCTGCTGAGAAGCCATTGGTTGCTTCAATCAACTATGAGAATTTAAGTTTTCTCAATTACCTCTGAAATGTTGCAACATTAATGCTTAATGACTCTTTCTCTTTATCAATTTTTTATGTTGTAGCAGCATGGCAAGCGAATTGGAGATGAACATCCTCATAATTTTTCTGCAACCACGTATTGGCAACTCATTTGATGATAATTGACAAATGGAATGAGAAGACATTGTTCAATGAAATGAGTTTTTGGTGT…
MsMYB041	MSAD_234746.t1	Medtr1g111830.1	At5g04760	At5g10750	PubMedID:27117388	MSAD_255225.t1	Medtr3g105780.1			√	√			√		√		√					√	ATTTTTTTTTTTTTTGAGCAAGTTTTTTTCAAAAAACTTAATTAAATCTTCGAAAATCATAATTAAATTTTTTGAAAACAAGTTTATTTCAAAAAGTTTATTTATATTTTTTAAAATTTTGGAAAATTAATTTCCATATTTTTAAATTAATTTTTTATTTTTATATGTTTATTTTAATTTCGAAATATATTTTTTGTTTTTAAAAAATGGTTTTAAAATAATAAAATTACAAAATCTAGTGATGAGGGAGTATGGTAAGGATGTGTTCTTGGTTTGATCTAATGGTTAAAAACTAACTTTCCCATGGTGGGAAAAATTAGCCTTTCCCATGCTAAACTTCACCTTCAATCTATCCTTACCTACTTTATGAGTTTTTCACTCTCCCTCTATCTTTTTGTG…
MsMYB041	MSAD_234746.t1	Medtr1g111830.1	At5g04760	At4g32770	PubMedID:27117388	MSAD_281131.t1	Medtr3g110160.1								√			√						AATATAAATTCTTAAAGTAATATCGAAGAATTGTTTTTGAACGTGTCCCATTTTTATTGGTGTTGGTAAGCTACCCATTTTTTTTCTCCAAATAATTTAGTGGTTAGAATTCATATTTTTAAAGATAAATAAGTGAGGTGTGTCCGAAGTTCGAATCTCAGCCCCTGCATATAATAATACATGTCCCTACCAATTGAGATAGGCTGATGATGACAGCTACCCAAAATTCTTTTTTTTTTTAGCTACCCAAAATTCTTTAAAGCAACCTAAAAAATTCCAAACAATTTGCATGGAGAGATATCAGTGTATCACACGCACCAATTAAAAGACAGATATCCCAGCATATATAGTGCTTCGAATCTTTTGATATTGTTTGAAATTTGTTGGCCACATTGAAGA…
MsMYB041	MSAD_234746.t1	Medtr1g111830.1	At5g04760	At1g19740	PubMedID:27117388	MSAD_275204.t1	Medtr3g112420.1			√		√	√	√	√			√	√				√	ATGAAATCAGGTTTTAAAACTTGAAAATCGATCCATAGTCTAATTCAATTTCATCTAAACACGAAATGCATAATTATTCACCAAATAAGCGAAAAGGGGATACGAAAAGGAAACAATTATAGAAAGAAAGAAAAAAGTTCAGTTTGTTTGTTCGATAAAAAAAAAAAAAATTTAATTTATTTATTGTTTTAATAGTAGACAAATAAAATTTCTCATATAAAAGTTTTTTATCTCTGTTTAACCATCACCACCAAACAAATCTATTATTACATCTAACAAATTTCTCTCAAATTTCCAAAATAAAATTCAATTTAATAAAGGGTTTCTTGTTTACCAAGTTTATTAGTCAACATTACCATCATAAATCCCATTTCTAAAAATGGTCTCTTTCATAAAGGA…
MsMYB041	MSAD_234746.t1	Medtr1g111830.1	At5g04760	At1g20340	PubMedID:27117388	MSAD_324613.t1	Medtr3g114850.1			√		√	√		√									ATACTCACATTTTTTTAAGATAGATTTTGATTCCAATGCACATAAGAACTTTGTTTGAATAGAAAAGAATTATGACAAGAACTCGTCTCATTATACATTTAGGGTTTTTGTTCAAATTTTGTTGTTGATCTGAGGACTTTAATTTGGTAGTGGATAATGCAAACAAAAAAAAAGTGTTCCTTCAACCTTGAGATCACCTCAACGTATTTTTATTAATCGATTATAAAAAATAAATTATGTGGAACAATGACGGTATACTCGGCAACAACTTATGAGTGGTCTTTGAAGACAAGCAAGGTAAAACTTCAAAGCCAAAAATGCATGGTATCAATATAAAAAAAGCAAAAATACATACAAATGAGATAGATGTTAACAAGTGGATAACCCAAAAGATTACTT…
MsMYB041	MSAD_234746.t1	Medtr1g111830.1	At5g04760	At4g35090	PubMedID:27117388	MSAD_253502.t1	Medtr3g115370.1				√	√		√	√				√	√	√	√		TTTATTTGTGGGGTCAAGATAGTTCATGTATATGTGCTTATGTGGCTAATGTGTATTGGTTGGGGTAAATTACTCATCATTCTTTCATGGGTAGCCTAGTTGTCACCTTAAAACAAACATACACTCTTATGACATAATCTTTTTTTATCGGTCAAAACCAATTTATGTAAATCCTATAACAATTTGGTGAGACTCATGTATTTGAATAAATAAAAGTGAGTATGTTTGTAAGCTGTAAGTGTGTGAATTTTAGAGCAGAAATCTAGTCTTGTTATCTAAATTAGAAGTAGAATTATCTATCTAATTTTGGATTCCACTAAAAAAAAATCATGGCCTAGTTTCTCCTCTGCCCCCAGTGGCAGATGTGTGGAATGCATGAATGCAGTAAAAGTTAGACTG…
MsMYB041	MSAD_234746.t1	Medtr1g111830.1	At5g04760	At1g76400	PubMedID:27117388	MSAD_256126.t1	Medtr3g115980.1		√	√				√	√			√				√		CATTGGATAAGTAGATAAAAATAGAAATATAACATTGGAAAATGATGAAAAATGATAAATTTAACTTTTTAAAAGTCAAAATGTTGTTGAAACCAATGCAAACATGTTACTTTTGGCTTCCTTAACCATTGTCTGAGGGCAATGGTTAGCAAAACCCTTTAAATGTGCTTTCAAGCAGGTTGTAGACTTGTAGTAGTATACTAAAATAGAAATATATTGTAGTCTAAAAAAATGTTTAATATGTTTTTGGTCTTTATAAATATACAAACTTTTCGTTTTTGTTTTTCTAATTTTTTTCTTCTTCAAGTTTTAGTCCCTAAGAGTTTTTCAACTTCACGTTTGATTCCTCTTTATGTAAACTCATATTTAAAATTCATATTTTTGAATAAAATTTTACAA…
MsMYB041	MSAD_234746.t1	Medtr1g111830.1	At5g04760	At2g21380	PubMedID:27117388	MSAD_211453.t1	Medtr3g117330.1			√				√	√									CATGGCTGCAATTGATAAAAAAGTGAATACAAAATAAGTCCTTCAGAAAAGAGAAATGATATTTTTACAACCATTTTTTGACGACTTTTGTGATAATTTTCTTTTTCATATTCACATTATGTTTTTACTCTATCTCTATTGCTTTGATTTTTGTGACGATACCACATATTTTTTTTAAATTATAATTGTCCTATTAATTATCATTGAAATTGTTGTTCAAATAACACAACTCTTTAAAAAATAAAGAATGAATAATTATTAAACTAGGACAATATATGTTATCCCGACCCAAAACAAATGATAGAAGGATTTTTCCCCCTTAAAATTATGATTTTTTTTAATCCTATCATGTTAGTTTTACAACGCAACTAATTTTTGCTTTTGGGATAAATATACTGC…
MsMYB041	MSAD_234746.t1	Medtr1g111830.1	At5g04760	At1g18720	PubMedID:27117388	MSAD_327617.t1	Medtr3g435230.1			√	√		√	√	√									TTTTTTTTTTTTTTTGACCAATTTATATTAATCTGTCAAACTTCAAAGTTGTTTGAGAATAATGTTAATTGGTGAAATTGTAAAACTTTGTGAAGCAATGAATAATATTGAGGACAAAATTGTACGATAGAGTAAACATCAATCCAAATAACATTATGTAGAATCAGAATCCAATTAGAAAGCTCTACAAAATTTATGGTACATAAATGAAACTGAAGAACACATCAGCAAGCGACGACATAGTAGACTTGACCACACTCGTAATAGCGCAGAAAATCGTAGCTATGCAGAAATGCATAAACCAGATACACTTATAAACCAACCTATAACGCGAATTATGCAGTAAATCATGAACATTTAAACGCAACAATGCAGAATCGTATATATGGGAAAATTCAC…
MsMYB041	MSAD_234746.t1	Medtr1g111830.1	At5g04760	At1g18730	PubMedID:27117388	MSAD_327613.t1	Medtr3g435320.1	√	√	√			√		√									AGGGCTAATACCAAAAATATGAATTTATTGTTCTTTTAAACCTGTTCAATAATATCTTTCATATATGGTATGTAAATGAGATGCTTGGTTCTTATTGATAATTCTAACCTCACTTATATATTAAATTTTCTAATTAAATACAGATAACTTTATCTAGGAAAATCATATGAGCAGTAAGCACCACTATCACTTGATCAAGCCCTCGTATCAAGATTTTTACCTAGTAAAGAGAAAATGTTCCCAAAGATATGCTTTGTTGTTTTTCAAACTCCAATTTCCCATTACCTAATAGAGCAACAGAATCACCAGCCCCTTCATTGACAATTAAAATCTTTTGAAGATGGTTTCCCTCACTTCGACTAGCATCCGTTTGCATAAAATTTGAAGTAGACAATTCGT…
MsMYB041	MSAD_234746.t1	Medtr1g111830.1	At5g04760	At1g06680	PubMedID:27117388	MSAD_214269.t1	Medtr3g449930.1	√		√	√			√	√	√			√					GCATGAGTAGATATGCAACTGACATTGGTGTTAGAAGTGATGTGGTCAAGGTTGGGGTAGAAGACTTGGCTGTGAACTTGGGATGGACGACTTGTTCCGATGAGGAGGAGGTAGTTGGAGATGGAACTGCAAATTCACCGATTATCATATGATTTAGCTAAAGTTAATTCATCCTTGTGCACATGAAAACTTCTGCATATGTTATTCTAAGTTATTACACTAGTAAGTTGATCGCAGAATCAGATGTGACCTTCATTTTACATCTGCTGAATTAATTAATATATAAGGCCTTTATCTTTTCTTTTTCTTTCCCCTTGTATCCTTTACAATAATAGTTGGTGTCAAGTTACTCATGTTGTACATGGGATGTAATAGCAGTTATACTTGTTGTAATGACTA…
MsMYB041	MSAD_234746.t1	Medtr1g111830.1	At5g04760	At1g06900	PubMedID:27117388	MSAD_295029.t1	Medtr3g466820.1			√				√	√				√					GCCACATTATTAAGAACAACGAATATTTTTTTCAGGGATGTTGTAAATAGAAATATGTGCTATATGGAGGTATAACTAGCAAATCGCGCCAAAAGAGCCTAAATCATAAAGAGACTTCAGTCAAGCCCTTCATCATGTCAATGTTTGGGATATTTCAATGAACTTTGCTACATACATACCCCCCACCAAATGTTTCTATATACACCTCACACCTTAAAAAAAAATTGAACCCTAAACCGTCGTTTCTTCAACCTATGTCTAAGACAGACCCTGAACACATATAAGAAAACTTTGAGAAGAATGAGACAACCTACCATTATTGAGGGTGTGTTTGGTTGAGAAGAGAAATTGTGAAGAGATAAATAGGTGAGAAAGAGTTTGAAAAGAGAGAAATAAATG…
MsMYB041	MSAD_234746.t1	Medtr1g111830.1	At5g04760	At3g15850	PubMedID:27117388	MSAD_244919.t1	Medtr4g010150.1					√		√	√									GACAAACGAAGTACTAGTAAACAGGTATGATTTACAATCACAATCATCAAGGTTTAATTCAATTTTTAAGTATATGTTACATGTCTTATTGAATTCGCCAGGTAGTGCAACAGCCGTAGGAAGGAAAGGGCTAATGAAGCTAAGGTTAAGTTAACTTATCTGGCAGCATCTTGTGTGGCTGGCTAACATTTTGAAAGCCTTAAGATTTAAGAATGTCTGGGAAAACGCACCCCTAGCTCAAATTCCAATAACAATATTCTACTCCCTCCATATAAAAAATATTCCCCCTTCCTTATAAATTGTACTACTCCTGTCCATCTGTTACTTTGAAATGAAATTTTTATCTGCTGTAATTTAGCATTCATTTAAATAACTTAAAAGCTCTGCTGTAATTTGACA…
MsMYB041	MSAD_234746.t1	Medtr1g111830.1	At5g04760	At3g08940	PubMedID:27117388	MSAD_264747.t1	Medtr4g015570.1			√				√					√					AGTAGTTAGACCAATATTAGTTTTTCAAAAATTGTTCATAAAAAAGATTTTCCAAAAAGAGATTTAGGGTGTGTTTGGTAAAAGTAGACTATAAACTAGCTGATAGTTAGAAAAACTAGCTTGTAATTAACGACTGATAGCTGAAAAGTTAGCTGATTAAATTAAAGTGTTTGGTAAAATCAGTTTTTCAATTAATTAATAAATATAAAATGACATAAAAGTACATGTATGTTTAATTTGTATAAGTTATATGTATAAAGTTTTTTTTTTTCAAAAAAAATGCACAAACATTTTTGACTGATATATATATATATATATATATATATATATATATATATATATATATTTTCCTCTTGAAAATTATAAATATGATATATGAACTTAATTGAAATACTTTTT…
MsMYB041	MSAD_234746.t1	Medtr1g111830.1	At5g04760	At3g47160	PubMedID:27117388	MSAD_264745.t1	Medtr4g015600.1		√	√					√	√		√					√	GAATTAATTCACATGTCCAACTCATCATAGTAATAAAATAATAATAACTAATCATTAAAGTATATGTTCAAAAGAAAGAGTCAAATATGTTCAAAAGAAAGAGTCAAATATTGGGTTGTTCTAGCAATTATATATATATATATATATATATATATATATATATATATATATAAAATATATATATATGAGATATTATTCAAAAAGTTGATTAATGTGGGGCTGTCGGATATTATAATTTATAGTGGGTCGTTGCCGGTGCAATATTTTTTAGAAGAGTAGTGATATTTGTACATACATTTCATAACAACTTTAGTGACAACCTTGTTTTTCTCTTTTCTTATTGATCAAAAACAATGGAGAGAGAGAAAAAAAAAAAAAAGACATCATATAAGTATGAAA…
MsMYB041	MSAD_234746.t1	Medtr1g111830.1	At5g04760	At3g56870	PubMedID:27117388	MSAD_223289.t1	Medtr4g019490.1	√		√	√			√	√									GTACATGGATCAAGTCTCGACAAGGAGAAAAAACAATTTTTTTTTTTTAAGCAAAATGAAAACAATATTAAAATAAAAAGAAAGATACAAAAGATTGGGGGACATGAGATCTGACCCAGGTACAATTTATACGGAAATACATCGTGAAAAACCATACCAAGTGGACCAGTCCGAATCTATTCAAACAAAAATTCACCAGTCATGGGCGCAACCCAGCGAACCCGTTTACGGGCACAAAACCAAGCTACAAAAAATAAGACGAGGGAACTTCTCCCACAAACAGTTAAGATTAAAAAATGGCGAACCACCAACATGGTATCAAAATTCTAAGTGCCAACAGCTCCCTGAACAAGCAGCAAGCATAAAGCTCTTTCGAGCGTGTTGAAACCTGCAGAACTC…
MsMYB041	MSAD_234746.t1	Medtr1g111830.1	At5g04760	At2g22420	PubMedID:27117388	MSAD_231313.t1	Medtr4g030890.1				√				√			√	√			√		AGCTTTTTCAGCGGACCCTGAATGAAACTCTAGATTCCTTTCAGAAATCCATACACGAGGATGTGAGAAACGTCCATCTTGAAATATTAAGACAGTTTCATCTGCAAGAGGTATGCATCTGGAATAAGCGAAGGCCGTTTGCATTTTTCATTTCTCTAATTAAATGTCTTGTTCAACAGATGGAAATGTCAACCGCAATGAACTCAATTCTGGAAAACCAAGCTGAGTTGCTGAAAGAGGTTAAGTCTCTGCGTAAGGAAAACGAGCAGCTTAGACAATTGCTTTGATGGATGTGAATAAGGTCGTGACATTTTTCTCTGACAGTGTCTTTATCACATGTGATCTCTTGTATCTTTTATAGACTAGCAATTTGTCTTTAATTTGTTTTAGGCGATTGTG…
MsMYB041	MSAD_234746.t1	Medtr1g111830.1	At5g04760	At5g55090	PubMedID:27117388	MSAD_236229.t1	Medtr4g049730.1		√		√	√	√	√	√									TTTGTGGGAGTTACAGTGAACTCACTCACATTTCTGAATCCAAAACCTTCCTTCTGTTTGTTATTAATTTTGCATTTTGAATGATTGTTGTTGAAGACTGGGATTATTTAACTTTTGAATTTGTTGAAGATTATATTTTTGGATGTCTTACACTGTTGGTTCTGTTCTTTGGCATTTGAATGTCTTCCATTCTAGTATGACTCAACACACTTTCAAACATGCTTTACTACTAAATCTAGTTGTGTTTGTGTTGTATTATTGGTAATGACATTAGAAATTGTTATGCTAAGGAGGATCATTCATTGGTATAGGCTAGCTGTCCTTCACTTCCATAGAATGCATAAGGCAGTTGTAACACTCTCCATTCTGCTCACATAATGCATTCATATTTGATGCCAT…
MsMYB041	MSAD_234746.t1	Medtr1g111830.1	At5g04760	At1g08125	PubMedID:27117388	MSAD_320934.t1	Medtr4g057605.1	√					√	√	√	√		√	√	√			√	CATTTTTGCAGCTAATATGGCTTTGTTGTTTTTCAATGTTGTGGACAGAAAAGAGAAACAGACTCTTTAACAATAAAGCTAAGGCTCTGTTTCCTGTAGGAGACATGGCTTTTTTTTTTTTGGCAAAATAAATATGAACCATTGGATAAAAGTAAATTAACTTTGGATCAAAATGCTTACTATATACCTCCCACACCGAATTACTTTCTTTTATTCTAAATTACTCTTCTCTTTACTTCTAAATTACTCTTCTCTTTTATTCTAAGAAAAAAAAACAGTCATGTCTCCATCATTATCATCGTCGTCCATAACATCATCATGGTTAGACTTAGAGACATAATCTCGGCGCCGTTTATGGTAGGAGACTTGAATAGGTCTCCCACGGGAGGAGACATTAAA…
MsMYB041	MSAD_234746.t1	Medtr1g111830.1	At5g04760	At1g06720	PubMedID:27117388	MSAD_327313.t1	Medtr4g068150.1	√	√	√	√			√			√	√		√	√	√		TCATCTCATTTTTGATTTGTGGCTGCTGAAAGACCTAGCATTGACAATCTCAATTTTAATATGCTTAATTTAGGTCAGTGTGGAGAGTTAACCAAACCTTTCTCAGTTGAGGAAGTAAAGCAAGTTGTATGAGATTGTGACAATTTTAAAAGCCCTAGACCATATGGTGTTAATACGGGATTTGTTAAGGATTTCTGGACGGAACTCTGTGATGATTTTATGCGCTTTATATCTAATTTTCACAAGAATGGGAAGTTGTCAAAAGGTATCAACACTACTTTTATTGCTTTAATTTCAAAAATTGAGTGCCCGCAACGCTTGAATGATTTCAAACCAATCTCTACGGTTGGAAGTTTATACAAAGTTCTATCAAGGTCCTCACCAATAGATTGCAAAGGG…
MsMYB041	MSAD_234746.t1	Medtr1g111830.1	At5g04760	At1g75840	PubMedID:27117388	MSAD_248676.t1	Medtr4g073250.1			√	√			√	√		√	√					√	TATTAATCCAAATTTTATTTATTCTTTGAAGCCACTTTTGTTGGTCGTTTTCTAATTGAAGTCGCATGAGTAGTCTTTTTTGAATGAGTTTCACAAAGAAAAGTAAGAGAATTAAATGATATCAAACGTTTTTAGCGCTGAAGCAATTCAATAGTCCTAAGTGATATCCTTCCATTGATAATGATAGAGTGTGACAAGTTAAGAGAGTTAAATTTGATATAAAAAATTGTACATCAAGCCAATAAACTAAATTGTTATTGCCTACTTAATTATCTGATTTGTCCTATCAGTGAGAATCCTTTGTATTTCACTCTTAATTACAAATAATAGAGATTTTATTTGAGATTGAAGCAAAATGTGTCAGCAGAAATAAATATTGAAGGAAAAAATGCCACCAAC…
MsMYB041	MSAD_234746.t1	Medtr1g111830.1	At5g04760	At1g06290	PubMedID:27117388	MSAD_302943.t1	Medtr4g079290.1							√										TTTCATCAATCACATATCATTTCGTGTCATTTTTATGTCCCTTTCCCACTTAGGAAAAAAGAATATAACTTCTACTAACTGAAAAATTAAATTAATTAATTTCATAATACAGTACTCCTAATCACCTGCACCCATATGAATAAAATATTAGTAGAATACAGTACTACTTTTATTTAATCAGCAGTCCTCTTTTTTCATTATTTTTTTCTGAATGAATAATAATTGAAGTGCATGTGCAACAAGCCATCATCACGTACATACTTTCACATTTATATGGGGCAATGAATTTTTTTTCACACAATACGGTACAATGAACTAAAAAAAGTAACTATTTAATAATAAAATGAACTATTATAGTAATTACTTAATGATTAAAAATAGCCATAACCCATAAAAAAT…
MsMYB041	MSAD_234746.t1	Medtr1g111830.1	At5g04760	At1g49780	PubMedID:27117388	MSAD_234953.t1	Medtr4g085720.1	√		√	√	√								√				TGATGAACTTCTCAATGACCTTATCCAAAAAAACTGTATACCTAGACATTTTTTTTTGGTATGGCCAGTATAACTAGAAGTGTGAACATATATTTTCCATAGAATATCTTTGAAGAAAATTTAGTAAATTAAACTTTTCTTTTTGAGAGAAGAGAGAAGTAAATTAAACTTTTGTATCATAGACTATTACAACATGTGGTTCGTAGTAATTATTTATGGCGCACTTTCCGAACAAGATCAACCCATCTCACATTCTAACCATCCTTCCATCTCTCGTCAGTGCACAATCCTCTTTCCCAACCAAGTCATACCACTGTTTGTAGATAAAAAAAAATCAGTTAAAGCATACGGCGTGAACTTTTCTATTAGAAAGTGTGAACTAACATTGGTAAAATAAAA…
MsMYB041	MSAD_234746.t1	Medtr1g111830.1	At5g04760	At4g34000	PubMedID:27117388	MSAD_276806.t1	Medtr4g085910.1		√	√	√			√					√					TATCGAATACGTTATTGAACCCGTGCGAAGCACGGGTTTATAACTAATTTATTTATATAAAGTTGTCTCAAGCAACTTAGATAGAGACGAATTAACTTTTGAGTTTTTTTAAGGAAAATAACTTTTGAATTATTCAATAGACACACATAGCTTTATTTTTTTTCGTTCAAAACAGATTTACTTTAAATCCTATTTTTTTTGTTCAAGTTACTTTAAATCCTTTTAATTAGTGATGATGATAAAAAAGTTTATAAAACATAATTCACATATACTATAATAAAAATTTTGTTTTAAAAAATACTACAATAAAATGCTTGTGCCAAAAAAAAAGTTTTTTGGCCGGATAATAAAATGTTTTTATTTTTTCCTTGAAAGAGCAACAATATATTGTTAGTATCT…
MsMYB041	MSAD_234746.t1	Medtr1g111830.1	At5g04760	At5g09660	PubMedID:27117388	MSAD_228887.t1	Medtr4g092690.1		√	√					√			√					√	TTAACTATTACTAATAGTTTTGTAAATATTAGTTCATTTAATAAGGACAATGCATAATATACGTAGAATTCAGGATTCAAATCCCGGATACTATAAAAAAAAAATAGTCATGTAAAAAAAATTATTACTAATAGAATGACGTTAGGAACATCAAAGAAGTTTTTATGTTGGTAGCGAAAGTTGAATCTATATAATCTTATCGTTGAATCAATTTTTTACTAATTGAACCAACCTGACAGTGTCAATCTGCATGTGGAAGATTTATTATTTTTAACCTTTGATTAAGAACGGAAGGGAGAAAAATCCTTTACAGGTAAGAAAAAGCTCGGAATAGAAGTGAAGAGATTCTGTGTCACTTTACTAGTCAAATGCAAAAGAACAAATTTGAGCAAAAGGAAG…
MsMYB041	MSAD_234746.t1	Medtr1g111830.1	At5g04760	At5g63980	PubMedID:27117388	MSAD_301762.t1	Medtr4g094672.1		√	√		√	√	√	√			√						TTTATTATATGCATGACATATATAAGCTAATATAATATTGTAAATACGTCGATAGTGCAAAATATGACTTAATTACAAAGACAAGTTATACCAAACTACCATAATAAAACGTTATACTCAACTTAGCATCAAAATACAAAAATTAACGCACAAAATCATAAGTTTCATAAGTCTCTAAGTTTAAGTCATTCATAAAACTATCCAAAAAAGCAAGTTTCACAAGTTCCTAAAGTTGTTAATAAAACTATCTAAAAAAATAAACTAGTTAATTTTTTCAAAAGGTCAACAAACACCACCACTGCAATCCTAACCGGCGTCGAAATCTGAATTTCCATCGTCGGAATCACAACCCTAACTAGTATGTGCTTCCCTGTTCATGGTTTGAGGACTTAGAGAAGA…
MsMYB041	MSAD_234746.t1	Medtr1g111830.1	At5g04760	At2g44050	PubMedID:27117388	MSAD_301753.t1	Medtr4g094700.1			√	√	√	√	√	√					√		√		TTTAGCATCTCGTGGCTGCGCAAGATCACAGTAAGAAACAAGCCCTTTTATAATCTCTTCATCCAAACCTAATCCCAAACCCGTCTCGATCTTCGCGCACAACTCCACCAACGCCTTCTCCAGCCACTGCCCCGCCGTTTCCATCCTCTCTCTCTCTCTCTCTCTCTCTCTCTCTCTCTCTTTCCAAAACAACTCACTAATTTCAATTCCCTAATTGACATGCCACGTACTCTCCAATGGGTCCTACTTTTTTATGACGTGGCAATCACATTCCACAACTAGAAACAAAACGCTTGAGTGAATCATCAACTTCGTCCCTGAATTTTTACGGGTCGGCCAACTTCGTCCCTCAATTATGCGAAATATCAATTTAATCCCTGAGTTTGTTAAATGTCAATC…
MsMYB041	MSAD_234746.t1	Medtr1g111830.1	At5g04760	At4g37270	PubMedID:27117388	MSAD_316995.t1	Medtr4g094985.1	√			√							√	√					TGTCATTATATGCTATTTTCAAAAGAAAGAGCAAATCCCGGTCTTGTTCTAATTGAAGTTTGATTGATTAGAATTCAATGGTCCCCAATCTTATTAAAACAGACAAAAAGAAATTAAAGACCATTCATAAGTAGTGTCAAAAAAACGTTTGGCTATGACCATAACTTTGAGTGGAACCAATGAAAAAACTTGGTAAGATCATAGCTTCACCACAAGAAACCAAAGAAAATAAGAGAAAGTCAATATTACTTCTCTCTCTGTAATCAATGTCTATTTTTCTTTCTTTCTTGATTTGCTCCACTTCTTAGATGCTAAGTACATTCAAAGCCTCATTTATTGAGGAGAAGTAGCTTAAGGTGAATGAGAAAACGACTAAATGGTCATGCAATAAATCGATAT…
MsMYB041	MSAD_234746.t1	Medtr1g111830.1	At5g04760	At5g67520	PubMedID:27117388	MSAD_258560.t1	Medtr4g097010.1	√						√		√		√				√	√	ATAAATAATTACTCTTTATAAAATGATTGAGAGAATCCTAATTACTTGCAGAGGAAGTAGAAAACAGACCCTAAGTACCAAAATAAAGAAAGACTAAAAACATTTCACCCAAAAAGAAATGTTTGCCGTTTCTCATGGGATTTCATCTCAATTCATACAAGCCAGTTAGGTTCCAACTCATGCAAATTGATCACCAAATCACCAAAATAAGAAGCATATTAAAACTCATTCCATATAAAGGGTTTCTTGATAAATGTATAGTCATGATCCTTATCATATGATGCTGATGTTGATGAAATAGTGACTTGCCATGAGCCTAAAATTAAAAACCCACTCAATGAGTCACATGCTAAGATTTTTCTAAAAAAAAAAAAAACTAAATAAAATATGAGTATCTTA…
MsMYB041	MSAD_234746.t1	Medtr1g111830.1	At5g04760	At4g17550	PubMedID:27117388	MSAD_249717.t1	Medtr4g099450.1	√			√			√	√		√	√						TGGATCATAAACAAAATACCGTTTGATTTAATTAATGGCTCGGATTTACTAAAACAAAAATGAGAACAATTTTAGATTTCTACACACAATCATGTCCCTTTCCGTTTCTCGTCCCCATCACATTCCTCTCTAACCAAAAATTCTGCAAAAAAATGGCTGCCACCATAAATTCTTTTGACCAAGACACACTAAAACAAACATAATGCATTAAGCCTTAATTGATGATGGTCATGTGAAACGTGAATCTGAACTTGCACCTCTTTTTCTTTTATTAATGAGTATTTTATATGCTTCTTGAAACAGTGCCAAAAAAATTTCAATAAACCAATTTGAGTTAGAATTTGTTGCACGTAACCACCTCCTTGATTTCATTCAATGCATACATATTTGATATTTAAA…
MsMYB041	MSAD_234746.t1	Medtr1g111830.1	At5g04760	At1g62710	PubMedID:27117388	MSAD_249824.t1	Medtr4g101730.1					√			√		√							TCTCAATTAAATTTTAGATTATCAGACATATTTTTTTCTTTGAAAATTCGAGGGATAAAATCAAACCTTAAATTTCTATCTAGGTTTCAAATTTTAAAAAATCCCCACCATAATATGCAAAAGATTTTAAAAAAATAAATTTAATTTTTTTTTTGACAAGAAAAAAATAAATTTAATTGTTGCCTAGGCAAAACATATAGTAACAAAAAATTAAAAATATTCAGGTGAATAACAAAGATAAATATCTATAATCTGAAATAATTAAAAGTAAAAGCATTCAAAAGAAATTCCAATCTTGTAGTCTTTTGATCTTATTAGTATCTCTTAATCTTTCTAGCTCTCTAATATCTTGTTGTTTGCTTTATTGGATCATCAATAAAAACAAAAAAAAATTATCCT…
MsMYB041	MSAD_234746.t1	Medtr1g111830.1	At5g04760	At5g20110	PubMedID:27117388	MSAD_299613.t1	Medtr4g114060.2					√		√	√				√					TTTGAGGTTCCTCATGTATACGATAGTGATTTTCACCTTTGGGTGTACATCATATATACGACATCTTGTATTTATCTTTAAAAAAAAATTTAAATAGAACATTTTTCTTTAGAAAAAAATACATTTTTATTTTATTACAGGCCTCTTTTCACTTACAAAGTCGAGTATTCGGATTCGTAGGAACGACTCTGCAACAAGATATGATCTCCACTTACCCTTAGTTTCTACAACATTATCAAAGACAAACTCTCTATCTAGAAAGACAAAGACATTTGGAGTTTTCCAAACAACCTAAAAACAAATCACATGAAATGTATGCAACAAATCACAATAACTCAAGTTCAGTCCATTTCGTAAACGAATTTAATTTTCAACTAAAATTTAACATTTAATTCATAA…
MsMYB041	MSAD_234746.t1	Medtr1g111830.1	At5g04760	At3g17470	PubMedID:27117388	MSAD_270580.t1	Medtr4g123930.1			√		√		√	√			√	√		√			AGGAGGAAGGGGGGTTGGGGGTTAGAAAGATGGGAGCTATTAATGTCTCTTTGTTGGGGAAATGGTGTTGGAGAATGGTGAATGAGAAGGAGGGGTTGTGGTATCGTGTGTTGAAAGCTCGCTATGGTGAGTTAGGGGGGTGGTTGCGGGAGTGTGGGAGGTGTGGATCCCATTGGTGGAGGACTGTTTGTCGTGTCCGGGAAGGGTGGGGGAGGGTGTGGGGAGTTGGTTTGATGATAACCTTCGTAGGGTGACTGGTAATGGGCGTAACACTTTGTTTTGGTATGATAGCTGGTTGGGGGAAATGCCTTTGAGATTAAAATTTTCCCGCCTTTGTTGACCTTGCTGTCTGTAAGGATTGTTTGGTGGAGGAGATGTGGAGATTGGGGTGGATGGTAG…
MsMYB041	MSAD_234746.t1	Medtr1g111830.1	At5g04760	At4g30920	PubMedID:27117388	MSAD_315580.t1	Medtr4g130860.1		√	√		√		√	√	√							√	AGGGAGCATTCCCTGATATCCCAATTTGACCCTTTTGTAAATGATGTGTTCTTATGCATTTCTCAAAAGATTTGATGTGTTGATATGTTCACGAGGAGTAAGCACAACAGCAGGAATTTGATCTTATAACATCAAATGATAGAGTTAAAATCACTTGAAAAAGTACAATTAGTGATGAAAAACTGACTTTTAATGTTTTTGTTTTTAAACAACTTGCTAATTTATGTTTTATAACGGTATAAAATCCTTTCGGTATGAGGTTTAAACCACTTTGATATATAAATTTATTGAGCTAAATGTGTTTTTTGTCCATATAAATATATTAACTTTTCGTTTTAGTACCTCTTAAAAATTTCTTCAACTTTTATTTCTCTAAAAAAATTAATATATTTATAAGGA…
MsMYB041	MSAD_234746.t1	Medtr1g111830.1	At5g04760	At5g13510	PubMedID:27117388	MSAD_315627.t1	Medtr4g131540.1			√	√			√	√				√	√				TTGGGCTTGGTGCGTGAATAGTTAGGTGTCCCTTGAATTCGACAAACTCTGATACCATGTTGAAATTGGGGGCCTAACTCAACCTTACAAAACCAGCTTGTGAAGTGAGGAGTTCCCCCTCTTTATAAACTCTCATCAAGAGTCTCATCTATCCGATGTGGGACTTTAGGTTTTTCCCAGTACCAACTTGTAAGATTAGGAATGTCATTCTTTATAAACTGTAATTAAATCTTATCTTTATTTTACGTAAACCTTGAACTTTGCTGACTAATTACAATTGATCATCAACCTTCTAAAAATCTTTTATATGATCGATTGTTGTATGCAAATTATATTCTGACAAGTGACGAAAATTTAAAGGGGAAAAAATATAAATATACTAACAACAAAAAGTGAGAG…
MsMYB041	MSAD_234746.t1	Medtr1g111830.1	At5g04760	At3g22450	PubMedID:27117388	MSAD_278868.t1	Medtr5g006310.1			√	√		√	√	√				√	√		√		AGAATGTGTTATGATATTTTTTTTAAATTATTTCTTAAAATTCATAAAATCTGTTGAAATCTCTTGAAATCAATAAAATCATTTCAAATCCTTTAAAATCTTATAAATTAAATCCATTGAAATCCTTAATAGTCTTTTAAAATCATCAAAGTCATCAAAATCTTACAAAGTCTTTTAAAATCCTCAAGACTTTTTTAAACAAAAATTGTCCTTTGAAATATTAATCCAATACACCCCCTTAAGAGATACATTTTTCTTTATGTTTGTGCATTTAGATATGAGTTTTCCAATCCATTTTGGTTTGTTTGAAAAAGTCCAGTGACTCATGTTTTGACTATGCTAGATTATGCCGCCGCGAACTCGATATCATGTTGTCACATTGCGTCCTTGATCTATGAT…
MsMYB041	MSAD_234746.t1	Medtr1g111830.1	At5g04760	At4g14890	PubMedID:27117388	MSAD_278869.t1	Medtr5g006320.1			√	√	√		√	√		√					√		TTTTTTTCTTTTTTTAACAAAAAAAAAAGGGAATATATGATGAATATAGAATTAGATGCTCGCGTAAAATTATTTTTGATGAAATAAAATCATTCAATATTTACCATTTTAGATAGGAGTTTAATGATGGTAGATTGATAGTCTAAAATAATTTTACACACACAATCAATTAAAATATTTAGAATCGTCACATCAATTAATGATTTTAATTTACGTGGTAGTTTAAAATATTTTGATTGATTACATGTGCAAAGTTGTTTTATACTGTCAACCCACCACATTAAACTCTTATAATTTTAAGTATAATTGGCCTCTTTTTTGACAAATCCTAATTGCCTTCTTTTGATAATCGTTAAACAACATGCTCACTTTTGATAAAAATAAATAAATAAATAAAAC…
MsMYB041	MSAD_234746.t1	Medtr1g111830.1	At5g04760	At1g63910	PubMedID:27117388	MSAD_315157.t1	Medtr5g010020.1							√				√		√				TCATTTTCACTCTCAAAGGACCTCAATCGGAACTAGGGGGTGTGCAAATAATTTGGTTAACCATAACCAAATCAACAACCAAACCCTTCCATTTTTTAAAACTCAGTCCAAATCATCAAAAAACCAAACTTAAAAAATGTTGTTTATTTTAAGAGCAACTCCGAACTTAAGGACTTGTTATGACAGGAAATTAAAATTATATTTAACTCCAAAAAGGATGGAAAGGTTAGTATTTGAGGTCATTGACTCATAACGTGGATATGTCAGCAAACAAAAGGAAATTTTAAAGGCTCAAAGGGGTTTAGTAAAAAAAAAAAAAAGGATAATTGAACTATATTGAAAATAAGCTACATCCAAAAATATATTTCCTTTTACCAGTAGTACAAATTTAAATCTAAA…
MsMYB041	MSAD_234746.t1	Medtr1g111830.1	At5g04760	At1g12310	PubMedID:27117388	MSAD_210818.t1	Medtr5g011850.1				√	√		√										TTTTCTTTGATGAGGATGTTTTCTTTACTTGTAAGATTAAAATGTTCTTCTCTTTAACAAAAACATTCTCATGAAAAATTATTCCATGTCCCTAATTATAAGACTATTTACAACAAAAAGTCATGTCCCTAAATATAAGATCATATACAAATTCCTAGATGCATTTATTAATCTTTTTCTAAATATACCCCTTATATATGGAAAGTTAACATTAAAATATCTTTAATTAAGGGTAATTTAATAATAATTACACACATTTGAGACAACTTTATTACTCTAATTAGGGGTGGAAATATGGTCCGACAATAGGCTGGGCCAAGTTGAGATTTGCGTAAATAGGTTAAACCTAGTTGAAAAAATTAAAGCCTAAGTCTGACCTATTAGCATGTTAAAGGTTTT…
MsMYB041	MSAD_234746.t1	Medtr1g111830.1	At5g04760	At2g35260	PubMedID:27117388	MSAD_313157.t1	Medtr5g014430.1	√		√		√	√	√						√	√			TCACAGAAGGATCCAAGTACCACACTCCCTGCAAAACAAAAACAAATCTAAACACCCTTTCAAGCCAAACTGTCTGTTTCCAAATCAGAGAGACACAAATAAGACAACGACAGAAGCAAGAGATTTGACACCATCTTTGAGAGTTAGAACCATATCCAGATTAAAGATCTAGATTTTAAATTGAAATGAAACACCACAAAGCTATTGATGCGACGACAGAAAACCACCCAACAACACTTTTGAACCAATCCAAAAGAGATTTTATGATCGACCAACCTTTCCTTCTGGTGTGGTGGTAGAAACCACCATCATCTAGAAAAATTTGGAGCAGCACAAACACTCGACCCTTATTGGACCTTGAAGAATGCCAATAACAACAACAATAGGTTGGGAACGCCT…
MsMYB041	MSAD_234746.t1	Medtr1g111830.1	At5g04760	At3g49950	PubMedID:27117388	MSAD_278018.t1	Medtr5g015950.1			√	√			√	√				√			√		CAGCCCATGAAGAAAAAAAAACCAGCCACATGAAATGCTATGATCGAACATGGCCAACTTAATAAATTTTGTTTATAGGCGACATCTAAAACAAATTTTAATAGATGAGGCTTTTTGTTAATAAAATCTAATGAAAAATATATATTTTTTTGAAAAGCCTAAAAAGAAGGTTTTAATAGCCTTATCTTTGAACAGACCCTATGATTGAAAAAGTAAAAAAGTTTAGAATACATAAAACATACCAAAATATGTAACCAAAAAAAGAAAAAAACCAAAATAATGGTGCCATTAAAACCAAGAAAAAAAAAATCTGAAAATCAAATTACTATCAAGTTGGATTGGTTCGAGTCATCGAATCTATAAACCGACCCACGCTATAAACACCCCTATTCACATTTT…
MsMYB041	MSAD_234746.t1	Medtr1g111830.1	At5g04760	At3g26610	PubMedID:27117388	MSAD_279261.t1	Medtr5g033680.1	√	√	√				√					√					CCGTGTTGAAAATCTCAGCAAAGAGAACGAGGAGATGAAGATGATGATGAGAAATCCTTAGGAATTGGGAGTGATCTCATTCCTTGTATGATGATGTACCAGTTATGTTTACAGTTAATTTTGGATATCTATTTTTTTTTTTCTTGAGTAAGAATTCTAGTTCGTTTCTTTGACTGAACATGTGAATGACATGCATCATTTTGAAACATGTTTTTGTATGTTATGTCTTTCAGTTTCCCATTGTTAAAAATGGTCATCTTAGTTCTTATCCTCTTATGAATGAATAGTTTAACATTCCAATTCCATAATCGATCTTAACTGGAAATAGGTACAACTGTGTCATCAATTCTATTTTGTATGTTGTTTACATTCAATTTGGAATTTTGTGTGAAAGTTAAA…
MsMYB041	MSAD_234746.t1	Medtr1g111830.1	At5g04760	At1g14205	PubMedID:27117388	MSAD_219235.t1	Medtr5g041290.1			√	√	√		√	√							√		AGTTATTCTTAATCCAAATACAAGTACAATCTTTGTGACAAGCATCACATGCACATTGGGAGTGAATCCACAGTAGCTTAATCATCCAAGCCTCCCCCCATACCCACTTATTAAATTAATTATTAGTACATACATACCACTATATAAATTAATCAAATGCATACTAAAATTTGCATTCCATTGCATTGCATTGAAGGTGATCATAGAATTGTTTGAATTAATAATAAGAATGTTTAACTGGGGTTCCATTGTTGTGACAGTGATGTTGTTCGTGTTGTTGACACCGGGGCTGTTATTTCAGGTTCCAGGTCGTTCAAGATGCATTGAGTTTGGAAACTTTCAGACAAGTGCTGCTGCCATAGTTGTTCACTCTCTCCTCTACTTTGGTCTTGTTTGTCT…
MsMYB041	MSAD_234746.t1	Medtr1g111830.1	At5g04760	At3g25855	PubMedID:27117388	MSAD_210637.t1	Medtr5g055190.1							√		√			√		√			TTGTTTGTGATTTTTGGGTTGTTAAGGTGTTTAAGGTGGTTGGAGGAAGCGTGTCCCGTTGTTCTGAGCCTTTTCCTTTTGATTTGTTTGGTTGTTTGCACCACCGTATCTCTTGTCGTTTGTCATACTTTTTGTGTGCTGGTCTCCGATGGGCCGGTTACTTTTGCTTCGAGATCGGGAGTCTGTGTCCAGCTGCATTCTTATTTGGCGCGATGTGGTGTTTCTCTGGTGCATCGGGGGTGAGGGGTGCCCTCCTGATTTGGTCCTAAAGTCTGGTGGGCTGATCACTTTTGATTCGAGATCGGGAGTCAATCCTTTGGCTTAAGTTTGGTTTGGGCTTTTTATGGTTTCTTTCGGTGGATCAGAGGTCGTGAGGTGGTGGCAACTGAACGATCTTTC…
MsMYB041	MSAD_234746.t1	Medtr1g111830.1	At5g04760	At1g19720	PubMedID:27117388	MSAD_300305.t1	Medtr5g071190.1			√	√													ATAAGCACTTTTTAATGAAGTTGGCCGAAAAGATGTATGACATTGTAATATTCTATAACTTAAAGGACCATTTTGTAACAAAAAATAACTTAAAAGACCAATTGGTAACAGAAAAACTTAAAGAACTAATATGTTATAAACATATAATTTAAAGGACCGTAGAATATATATGATTTTTTTTTATTTTAAGAAACGTGTTTTTTCTAAAATTAAACATAGAAGTCACTTTATCCTTCATTTGTATAAAACAATTGGATTGGATACCAGAGAAAAGTGATCACATCACATCACAGTATAAAAGACATCCTAATAGAATACCAACTAATATATACTTTTTTCTTCTCTTTATTCCGACGGTAATTCCAATTTGATTTTGTCATCATCGGCTAACTACTACTA…
MsMYB041	MSAD_234746.t1	Medtr1g111830.1	At5g04760	At5g58350	PubMedID:27117388	MSAD_274261.t1	Medtr5g075220.1																	TTCTTTAGAAAGAAAAGTTTTGCGTTATAGAAAATAGATAAAAATAAACATAAACAATAAAGAAGAAATAACAAAGAACATAAATGTAAAGCAAAATTAACGTTTGAAGCATTGTGATCTGCAGTGTTCATCCGAATGATTTATTTATATAGACATTTTTGCAAGGATACGTTAGTATTTTGCCGTATCATGTACATTCAAAATTACGTCATCAATAGTACTATCACGACAAATCTTTATTTAATTATTATAAAAATAAACCCATTTATCAGTGTTAATGTATTTAAATGTACGTGAATGAGATCAAATAAATTTGAAACAATTTTCACGATAAATGTGTTTGGGCAATTTTAATAAAGACCATTATTAATTTTTTTTTGTGGTGGCCAGGGTTAAACT…
MsMYB041	MSAD_234746.t1	Medtr1g111830.1	At5g04760	At5g16370	PubMedID:27117388	MSAD_253578.t1	Medtr5g076240.1			√	√			√		√		√					√	ATTTTTTTTTTTTTTGAGCAAGTTTTTTTCAAAAAACTTAATTAAATCTTCGAAAATCATAATTAAATTTTTTGAAAACAAGTTTATTTCAAAAAGTTTATTTATATTTTTTAAAATTTTGGAAAATTAATTTCCATATTTTTAAATTAATTTTTTATTTTTATATGTTTATTTTAATTTCGAAATATATTTTTTGTTTTTAAAAAATGGTTTTAAAATAATAAAATTACAAAATCTAGTGATGAGGGAGTATGGTAAGGATGTGTTCTTGGTTTGATCTAATGGTTAAAAACTAACTTTCCCATGGTGGGAAAAATTAGCCTTTCCCATGCTAAACTTCACCTTCAATCTATCCTTACCTACTTTATGAGTTTTTCACTCTCCCTCTATCTTTTTGTG…
MsMYB041	MSAD_234746.t1	Medtr1g111830.1	At5g04760	At1g71030	PubMedID:27117388	MSAD_278317.t1	Medtr5g079670.1		√	√					√		√	√			√			AAAAGTTAAAGAGTTGAAATATATTTTAAATAAAAATTAATTAATTTTGATACAAAATTATTATAATACTTTTTATAATAATTTTGTCACTTACCATTGCCATATCATTCCATCACTCAGGCTCATTCGTATCTCTCTCCTTCAATCTTCATCCTTATTTACCGTACCTCACCGTCAACACTTTATACCACAATTTATCCGTATCCACCAACACTATTTTTCTTTCTTTTTTTGGTAGTGACCAACACTATTTTTCTAACAATGTAATGTCAAAATCCCACATCTTCCTAAAATCTCCTTACTCTTTTTCCAAACAAATAGAATTTCAATTTACCCAAATTTATATCCTCAACAAATTATGGATGTGTAATGTTTAAAATCAATTTGATTAAAGTCATT…
MsMYB041	MSAD_234746.t1	Medtr1g111830.1	At5g04760	At3g07790	PubMedID:27117388	MSAD_248953.t1	Medtr5g097510.1		√	√	√	√		√	√				√	√		√		CCTGTTTGTTGATTTCAATTTCAGTTTTTCCTTGTCTTTGTAGTTAGTGTTGAGTTTGATTGTCAATTCTTAAATAAAGAAGGAGGTTAAAAAATAATAGCTATTGAAGAAATCTCACATCATTTAGTGTGATGAAGCAAGGGGAAGACCAATGTTAGATATAAAGACCTAAGTTCTTTGTTTTTAGATGCATTAGTCAGTAGCACTTTAACTTATATCTAACTTAGTTTAAATATTTGCTTTGTGATTGTGATAGTGTGGTTGTACCGGAGCATTGGAGTGAGAGTGAGAGAAGTCTTTGTGTCGTAAAAAATTTCACATAGTAAAATTCTTTGGTTTTATAGACAACGGTCATGATTTTTCACCGATTTTAGAATTTTTCACATTATATTCTTATGT…
MsMYB041	MSAD_234746.t1	Medtr1g111830.1	At5g04760	At3g07810	PubMedID:27117388	MSAD_248957.t1	Medtr5g097580.1			√				√										ATTAACTTTTCATTGCCTATGTTCCATATAGTTTTCAAGAAGGACTGAAGCTTCAGCTTTGATAACGTTCCATAAAGGAGAAAAAAAAATTGAGATGATTTTGCTTTGCTATTATTGAAAGCTCTACTTTCAGGGTGTTTGTTTCAAGGAAAGAAATTACATTCCTTGAAATGACATTCTTAGGAATAATATTTCAAGGAATAACCTTCATACCTATGTGAGAGTTATTTTACAAAATTATTTTTCTTTAGTGATATGAAAAATTGAACAGAATTGTAAAAAAATAGAGTAATAATTAGTAGAAAAACTTATGATAAGAAAAAGAAACTATTGGTCATTTAAAACATGTAGGATGAAATTTTACCTCCTTCCCTTGGTAAGTGAAGCGATTAGTGGATT…
MsMYB041	MSAD_234746.t1	Medtr1g111830.1	At5g04760	At5g14510	PubMedID:27117388	MSAD_305777.t1	Medtr6g004790.1		√	√				√	√			√	√					AAAAGAATAACTCATGAACAAAGGGTAAAGAGGGGGGAAGAGAGAAAAATTATTTGATAACTTAAAAAACTTTTAGTGTGTGCAAAAGTGAGGGAGATAAACATTATTCACTCCGTTTTAAAATGAGTGTGTTTTAGATCTTTACACACATATTAAGAAATGCAATGATTAAAAGAAAGAGAATGATTATTTTACCAAATTATCCTTATTAGCTATTGGTTAGTTTTAAAAGTAATACTCCCTCCGTTTCAAAATACATGTTCAATTTTTGCAATGTGCACTATTCACTTCACTTACTTTGACCATAATTTTTAACTAATGTATAAATATAAATATTAGCGTGTAAGATGTTGTTTGATTTGTCTCGACAAATATTTTCAAAATATTAAATTTTTATAA…
MsMYB041	MSAD_234746.t1	Medtr1g111830.1	At5g04760	At3g27870	PubMedID:27117388	MSAD_297382.t1	Medtr6g006910.1						√		√				√			√		AATAAAAAGACAGATAATGTATGTATATCAAGAATTACTTTTACACGTTGTTCCTCTTTTAAATCATGTCAACTCAATTGAATAAGTATTCGATAGCAGTGGCATTTTCTTCGACATCCAAATAGACCATACCAGGGAGTTGATATTTAACGGTATCAACAACATTAACTAAATGCATATATGTGTCTACTGACTGTGTCACAAATAACATTATTCGGAGACAGATACACACTTGTGCATCATAAACAAACACGTTGGCCATTTATGAAACCTTATCAATCTTAAATATGGCTCATAAATTTGCTTGTAACGGGGAATGCCCCATAAATTTGCTTGTAGATAGAATTCCTACCATGTTCAATCTTAGTCATCGTGGTGTCCCGCTCCCGGTCGGGGGCT…
MsMYB041	MSAD_234746.t1	Medtr1g111830.1	At5g04760	At3g01500	PubMedID:27117388	MSAD_263403.t1	Medtr6g006990.4					√		√	√			√	√					TCATTCTTAATTCCGAATGGACATTATTTCGACACTCTTGATTTCGAAGGGACAGAAATAGGAATAAAAGAACATCATGTTAACACAAACCAAAGGGGGAAGAGAAGAAAAAGTATTGATAACTCAAAAACCTTTTTTGGTATATGGAATGAAATATGTGAGCTATGTATTTAAAGAGAAAATCCACAACTATTCTATTCTATAAGAAACTTTGAGAACAAGTAACTCACATATTATATCTAATACCAAATGTATCATATTGAGTACCAAAATATATTTGATTGAGTGCTAAAATATTTCAAATCAAGTATCAAAATATTTTAGATTGAGTACTAAAATATTTCAGATCAAATACCATAATATTTTAGATTGCGAACCAAAATATTTCGGATTGTGTTC…
MsMYB041	MSAD_234746.t1	Medtr1g111830.1	At5g04760	At5g38410	PubMedID:27117388	MSAD_318462.t1	Medtr6g018310.1	√			√	√	√	√	√				√					CTACATCTGTCAATAACTTGTACTCTATTTCCAATTATGTTTCTTATCATAACATATCTAATCCCCACTCTCATTTCATTTTGTCTCTTCATGCTCATAATGAACCCAAAACCTACACTGAGGCAAACAAGTTTGAATGTTGGAGGCAAGCTATGCAAGTTGAGCTCACTGCTCTTGAAAATACTGGAACTTGGAAGATAATTGATTCACCTCCTAATGCTAAACCTATAGGTTGTAGGTGGATTTACAAGATTAAGCATCATGCAGATGGCACTATTGAAAGATACAAGGCCAGACTTGTTGCTAAAGGCTACAATCAACTTGCATTCAAAGGCCAGCTCTTTTATCAATTGCTTGCATTTGCTCGTCTTTTCCTTAATTCAAACTTGTGAAAGAACA…
MsMYB041	MSAD_234746.t1	Medtr1g111830.1	At5g04760	At3g27300	PubMedID:27117388	MSAD_261846.t1	Medtr6g022860.1								√		√			√				GTTTCCTTTCTTTTTGTGTTGTTTGGCTGACAGAAAAAGCAATTCTGGAATCGTACGTTTGCCTTCAAAACGTCAGTACAGGAGAAGCTGAAATTCCTAGCTTCCACGGCAAATCAAAATCACGTTTGAGTTTCAATTTTCAGTGATTGGTACACTTTACCAAATTCCACCATAGAATGGGAGAAAAGAGAGTATTTTTTTTTTAATTAATGAGAAAAAGGAGTTAGATATTGACAATAAATATTTATGGAAGATGGAGGATATATTGAGAGATGGGGAGAGAAGAAAATCAGCTATGAAAATACCGAATTTACTGGGAAAAAAATAGAAAGTCGGTTGTGCCATTGAGATAGAGAAGGACATGAGTGGATTGGATTTATTTTTTATTTCACATGGGGA…
MsMYB041	MSAD_234746.t1	Medtr1g111830.1	At5g04760	At3g56891	PubMedID:27117388	MSAD_236350.t1	Medtr6g026890.1			√			√						√		√			TCTTTCTTCTCCTTCAGATCTAGCTTTAATTTTGAATTATAACTTTTATTATTTTCTGTATGCCCCATTTAATTTTTAACAAGAGGGGAATTTTGAAGATAGAGAGCACCACTCACTTATGACCCATGGGTTTGCAACTTTTAAAGAGGTGGAAGAATAATCCTTCATGTTGACGAGAGTGAATAAAGAAAAGATGTGGTTTGTTTGATTTGTGTTGTAGAGATGACATGGCAAAGTGAAGAATCTTGGCTTAATTGGCCTATGCAATTTCGTATGTTAATACTCCCTTCAAGAGATGAAGAAATCCGCAGGAAATTCTTCAACGAATTTTCTAATTTACAACTTCTACTGCCGGATTACCTATCTTTAATTTGCCGGAAATTTAATGGATTTCACCAT…
MsMYB041	MSAD_234746.t1	Medtr1g111830.1	At5g04760	At1g55370	PubMedID:27117388	MSAD_253128.t1	Medtr6g032880.1			√		√		√	√		√	√	√	√				GTAATACTAATAATTGATTTTTAATAATAGTTAATTCTTTACTGTTAAAATTGACTTTATTTTAGAATAGTCAAATTCAATTTTTTAATCTTAAGCACAGGGTTAAGCTTGGTTTGTTACTACCAACTCTTTGTTGTGAAGAGTTGCGCTGTGCTGGTACTCCAAAAGAGTAGTAGAGGGAGATATGCCATAAATACTTAATAAATTTGAGCTAAATGACTTTCAAAGGCTTGGTATTTAGGAGCGTGCTCCTTTTTAGATCTCAGGTTTCATGTGTTGGGTCAACTCATAAATTTTTGCTCTGATTTCAATTGGCCATCTTACAAGTGAACGGTGAGATTGATTTTTGAATTATTTAATCATTGAGTTGGATGATAAAGTCAGTTTGAAAATTGTTTC…
MsMYB041	MSAD_234746.t1	Medtr1g111830.1	At5g04760	At3g17800	PubMedID:27117388	MSAD_236690.t1	Medtr6g071465.2			√	√		√	√	√			√			√			TTTTTCAATACAATATTTATATTTTTATCCTTTTATTCAATGCCTCAATAACACTCTTTTAACATTTCCCTTTATTTTTTTTCCAAGGATAGTCTATTTTAAACTAGTCTCATGTCTTTATTAATATACCAACATGTATTACGGTTTGATAGTTAATAAAATTCTTCAAGCGTTTTCCTCTAAAGAAATATGTTAAGTAACATAGGAGTTTCTTTTATGGGAATGTGAGATACAAATAAAATTAAACTACTTATAGAGCAGGAGCATCACATATATAAACTTGACTCTTTAAAAGGACATATATAAACATAAACATGACTAACGCAGCGCAAATTGATGATAAACTTTGGAAGTGGTGGTCCAGTCAATTCTTAAAGTGATCCTTGGTCTATAATTTAA…
MsMYB041	MSAD_234746.t1	Medtr1g111830.1	At5g04760	At3g17650	PubMedID:27117388	MSAD_218417.t1	Medtr6g077870.1	√		√	√			√										GAATGTTCAATTACGAAAATTACAAGTAAATCAATTATACAGTTTGTCAAAAAATCAGTACAGTTATACAAATAAAAGCTTTTGTGCAGATCTAGAATGAATAAGATTCTAAGAGGAGGAAAGAAAAACAAGAGGTTAGATATGTTTTGAACACACAGATTTATAACGGTACACGAGGTTCTTTTATAGAATGAATAATGATTTGGATTATTGTTTGTTATGTTGCTTCTGTGAAGGTTCGATGAAGAAGAAAGACAAGGTTTCTATAGATTTTCATGAATTTGATAAGTGGGTTTGATTGTGAGTTAGATGATGGTGGTGGTGTTTATTCCAGATTTAATGATTTGATTATATGGTTTTTGATTAAGTTGAAATGATGAATTTTTGAAAGGAAAAAAA…
MsMYB041	MSAD_234746.t1	Medtr1g111830.1	At5g04760	At3g18390	PubMedID:27117388	MSAD_248003.t1	Medtr6g084410.1							√				√				√		AATCAAATCAATCCAAATAAGTTAATAATGCAAACTCACCCGACTCCTAATCAGTACTGTTTCATAACGGTCCTCCATGGAAAAGGACGTTGATGTAACATCTAAAAAATTATAGGAACTAAAATTTGAAGGAAAATTTTAGAGGAAATTTTATATGGACTAAAGTTGAAGGAAATTTTTAGAGGAATTAAAATAAAAAAAATTGATATATTTATAATGACTAAAAACATATTTAACCCTAAGTTCTATTTATGTCGGAATATCCGATGATTCTAAGAATTGATTCACAATGGACTACTCATGAAGGTAGATATGTTTAACAATAATGTCAATATTTTTTTGAGCTTAGATTGTTTTTTCGTTAACTTATAACACATGTAATCCTTTTAATAAGAAATA…
MsMYB041	MSAD_234746.t1	Medtr1g111830.1	At5g04760	At5g56550	PubMedID:27117388	MSAD_309460.t1	Medtr6g090460.1		√		√			√	√		√							TTTCTAAAGCAACGTTGTTATCTTCCATGATTCACCTAGTGACATGTACTGTGTTTTTCTCGCGGATGCCTTGAGAGTTTCTTTCGCTCGCCCTTAGTTTTCCTTCCCCTCTTTGTTGTTTCTTTTTTTAATGTTTCCCTCTTGTAACAAACAAAAAAAAAAACTAGTAAACGGAAAAATGGGACCAATACAACTCAAAATGTAAAAGTTCATAAAGGTCTAGTAGAAAAAAGGAAAGAGTGTTTCTTTTCCAACGCTTCAACCTTCTCGTGTACCCTATTTTGGATTATAAAAAAAAAAATGGAGGGTTTTGGAAGATTTTTGGTGTGTTTTACGCTTTTGGATTACATAATTCAAATTCTATAGGATGCATGAGAAACCAGTATGGTGAAAAATAAA…
MsMYB041	MSAD_234746.t1	Medtr1g111830.1	At5g04760	At1g67070	PubMedID:27117388	MSAD_214126.t1	Medtr7g007320.1	√		√	√		√	√					√					AAAAGAAATATTTGAATTTATAATTGTTTATATATTATCTCACATGTGAATTTGCGATAAATTTTTTGCCCGAGCTCCATAAATTTCCTAGCTCCACCCCTACTACCATACCTTGTATAAATACCTGGTATAAATATTGTATGGCCTTATTTACTTGATTGTAGATTTGTAGGTATAGTTAGAAGCAAACATGGAGCTCCTTCAATTCCTTTATTTAAGTCTTTCTACAGCTAGCAACTTACAAAACAAGTAACTAGTGAAAATGATGGAGAGAGAAGGTACTTTCCATTAATTTTCAAGAATTTGAAGTGCTTGGTGCTTAAAATGCTTGTCCATCTCTAAGCAGTTAGCACCTTCTTGGTTCGGTGAAATCGTGAAGGTGAAGGGTATTATTTAGAT…
MsMYB041	MSAD_234746.t1	Medtr1g111830.1	At5g04760	At1g60750	PubMedID:27117388	MSAD_329833.t1	Medtr7g021820.1	√		√	√			√	√	√	√	√	√		√			AGGGCAGGGAAGGTATGAATTTGTTCTTTAATGTGTTACATGCTACCTGATGCATTTAGTCTTTTTCAAAAGGGTCAAGTTGAATTGATAGGAAAAAATAAGCTGTATTATACTATCAAAAGTAATTTGTTGTTAGGTTGTATTTTTTAATTGTGAATCTTGTTGAATATTATCTTGCTCCTATCATATGTGGATGCAGATGCTAAAATCAATTTCAGCTGGGAGCTTTGCTAATGATGGCGAAATCAACACCGTTGCAACTGATCTTTTCTTCATATACACCTTATGTGCTTATGACGTACAAGGAAGGCTAAATGACTTAGGATCACAACTCTTCACAGTGAAAAGTTTTGCTAGTTCAAAGGCTTGCAAGCCTCAGTACCTTCTTCAGATAGGCTT…
MsMYB041	MSAD_234746.t1	Medtr1g111830.1	At5g04760	At3g28040	PubMedID:27117388	MSAD_329862.t1	Medtr7g022160.1		√			√	√	√	√		√		√					TTGTTACGTCCAGTCCATAAGACCCAGACACAGAGAAGCCAAATATAAGCTGGAGAAAAGACTGAGAAGCCTTACTTCCACCTGTTGAGTGAACAAACTGAACAAAGTGATCAGATAAAACATTAGTGTCCACTCCAACAAAACCAATCCAATCACGAACCAACGACCAAAGTAAAGCAAAGTACGAATAAGAGAGAAACAAATGTTGCGCTGATTCCAAAATACCGGGGATCAAAGGTTTCATTTTTTTGACAATAGGGTCGGATAAAAAAAATTCCACCATGATAAGCAAATCAAAAGATTTTCCCATGTCAAATGCATATCATACCATTAATATAAACTTTTTAAAAAAAAATATTGTTGATTGAGTTTTAGAAGGGCAATATGAATGTAAAATGA…
MsMYB041	MSAD_234746.t1	Medtr1g111830.1	At5g04760	At5g01550	PubMedID:27117388	MSAD_328298.t1	Medtr7g062750.1				√			√	√									ATGTGATCAACACAATCTTTTTTCCGTGTTAATCTTATGTTTTCAAGGAAAAAGAATCCTAGTAATCCGGAGTTCGAAGAGGAGACAAGTAGTCAAGAATTGTTATGGGAATCGAACTCAAGTAGGTCAACATACTATTAATCTTTTTCTAATTATGAAAGTTAATTACCAACAAAAACACAATATGCTCTATTCTTTTTTTTTTTTTTTTGGTCTACAATATGCTCTATTCTAATTATGAAAGTTATTGACCAAATACATCATTCATTGAATGATTTTAAAACACTGAGATAACTTTGTAACAAAAGAATCTTTTTTTAGGGATGAAATCTCTTTTATATAGTTGTACCCAAACAAACAAAATGATTTTTACTACGATAACAAACACCAAATAGATTC…
MsMYB041	MSAD_234746.t1	Medtr1g111830.1	At5g04760	At5g02020	PubMedID:27117388	MSAD_251011.t1	Medtr7g065150.2					√	√	√	√			√	√					GAAAACATGAGAACCATGATCTCAACATTTGGTAAATACAGTTCTAAAGAACCGATCAAGTTGGACGCTTCCTTGGTCGGATCTTTCAAAGATATTCGAGAAAGTTTGATCAAACTTATAGAACCTAAGAAGAAATCATGATAGATCAAATGAAGATTTAAGTTTGGTTGATTCATAATATTTTGTGTGTTTTATTATGTTATTTTATGATGTTAAATTACATTGTTGCAATTCTTATTTTTAATGAATGTTATCGAAATTAAATTTCCTATGTTACGAACTCATCCACACCCTCCAAACTTTAAGTTTAAAGACAGTACAAGATTGATTCAAATTATATAATTCAAAATATTTTGAGAATGAATCCGAATTATATAATCTAAATTAGCCTAAAATATG…
MsMYB041	MSAD_234746.t1	Medtr1g111830.1	At5g04760	At5g01510	PubMedID:27117388	MSAD_258282.t1	Medtr7g068310.1		√	√				√				√				√		CATCTTCATTGAGACAACCCTCCACCCAATAACACACCGTCCACACACACCTAGCACTCCTCCGTACCATTCCCAATATCCTCTGCCTCCAAAAAAAAATACACGGTAGCTATAGAGTTTCATATAGTCTTGGTATAGTTAAATTCAAAGTTTTATATTTTTAAAAAACACGGTGGCTATAGAACTTTGAGAATTGCTCTTCTCCTATCTGTTTTTGCTCATTTATATCCAACATGAGTTAATTCACGTTGAAAATACACCTGCGTAAGTTAACTTACGATTATCTATTTTGATGGTAGCGAGCAAAACCAGATGGAAGAAAAGCAATAACCTAGAACTTATGAACATCATTAAGTATGAAGTTTTGTAATGGTTAAAATTAAACTTTGATAATTCATG…
MsMYB041	MSAD_234746.t1	Medtr1g111830.1	At5g04760	At2g33500	PubMedID:27117388	MSAD_239574.t1	Medtr7g083540.1	√		√			√	√	√		√	√		√				CCTAAAATATGTATTCGGTTGCAGCTTCTTACTAATGATGGCATACACAAACCTAGCATACAAGTCACTTGTTCTCCTCCTTAAAAAAATGTTATCAAAGTCAAATAATAACAACTATCAAACTCAATTATACAAGTTATGGAGGTTTGATAGGAATAGAGACTGGTTATTGAGATTATCTCATTTATGTGGTAGCACTAGCTATTAATTCCTTGGCTTCGACTTACAACTTATGATGAAGGATTCAAACGAATTTCACAGTTTGTGTTTACTTATTATTAGTCATGTATAAGTATTAACATACTAATTATTAACATACACTAACCTGACAAGTTTTATGAATTCCTAATTGGTAACTAGTTAGTATGTTAGTTTTTTACTTGAAAGTTGTGATTTATT…
MsMYB041	MSAD_234746.t1	Medtr1g111830.1	At5g04760	At5g13980	PubMedID:27117388	MSAD_239612.t1	Medtr7g084030.1			√						√		√	√					CTCCGATTACATTTATAAGAAAAAAATACTATTTTAGATTCATTGAATAATTAATGTATCCGGTTACATTTATATGTTAGATATATTAGTTATTCAATGTATCTAAAAAGTTGTTTTTTGCTTATATATGTGACCGGATGGAGAAAATTTTAACGAGGTCTAAGATAAATACTGTCAAAAATTAAAATCCAAGGTAATAGATAAAAAAAATATTTATTTGCTGGTAACTTCCTAAACATAATCATAGTAATGTATTTAACCAAAAAAATCATAGTAATGTACTTTACAAGAAGGAAAAAAAAATAGGTATTGCAAGAAAAAATAAAATCTATAATATTTTTATGAGTAGGACTATAAAAAACCTGTGTATTTTGTAAGGTAGAATTTTAAGAAATAATA…
MsMYB041	MSAD_234746.t1	Medtr1g111830.1	At5g04760	At3g03880	PubMedID:27117388	MSAD_239759.t1	Medtr7g085680.2	√	√					√	√			√	√				√	GGCGTATTTTCATGCATATGTCAAAAGTAGGAGTAAGTCTAATACTATCACGACTTTAAAGGTGGGGGAGGAATGGGTGGAAAATCCGATAGCGGTCAGACAAGATACAGTCGTGTATTTTTCTTAACACTTCTTTAAAAACATTTGTAAAAGACAAAAATTAGATGGTCTTGAATTCCCTCGTTGTACTTAGTATCAAAATATGGAGATATCAAAACCATTTTCGGAAGAAGAAATCAAAGAGATTCTTTTGTCAATGGATGGTAATAAGTGTCCCGAACTGAATAATTTTAATTTTAATTTATTTAATGCTTTCTGAGACGCATTGAAGAAGGATGTTGTATTGATGTTTGATGAACTCTCCTCAAACTCCCAACTACCAAAGGATATTCTCTCTTA…
MsMYB041	MSAD_234746.t1	Medtr1g111830.1	At5g04760	At3g03710	PubMedID:27117388	MSAD_239150.t1	Medtr7g086640.1			√	√			√				√				√		TTATTCTCCACATATATTGAAACACCAACCCTTCATGACTTATGAGTCCAAGTCAATCTTCTTATCCAAATCCACCTCATTTTAAATAACAAAAGAACTTGTATTGCAATTAATTACAATATATAGAACTTCTGTTCTTAAACAGTGATTTTTTTATAATAAACAAGATCAAATATATGATCACGTATTCATATTATATGAGCTGCTTATCACTCAGATCACACTAATTTAATGATTTCTTTTATAAATTGATAATATGGAGAGGATTCTTTGTAAAAAAAATATGGAGAGGATTTTAACTGATTTTAATAATCCTATTCTCTTTTATGTTAAAAATTTGTGACAAAACTCAAGTGTTCTTTATTTTTATTTTTTGGTCAAGTAACCTAGTAGTTAGAC…
MsMYB041	MSAD_234746.t1	Medtr1g111830.1	At5g04760	At1g02280	PubMedID:27117388	MSAD_301971.t1	Medtr7g088050.1			√				√	√									CAAAGACAAAAAATCAAGCAATACCGCACAAGACGACAAACAACACAACGCCGCATTGAGACAACGAAATCACGAGAAAAACACAAAAAGAAAAAATGAAATCTATGTAAAAACCACTTATTTAGATTAAGATAAGGAAGAAAAAAAGATTCATAAGGGTGATTTTTAGGCCAAAAAATAACCCAAAACCACCTCCCTCTCTTGAGTGATGGAGAAATAAAACTTACAAAGAAGTCGGAGTTTGTCTCTTAAAAAATTAGAACCGACTAGTTAAAGTTTGCTTATTTCTTCAAATTCCTTACCATTATTTTAAAAGTCATTATAAGTACTCACTATTTAGAACTATATAAAACTATTCTCTCTAAAAATAAAATAAAAACTACATGACAATTCAGATAT…
MsMYB041	MSAD_234746.t1	Medtr1g111830.1	At5g04760	At3g56910	PubMedID:27117388	MSAD_301999.t1	Medtr7g088520.1	√	√	√	√	√		√	√			√	√					ATATATATATATATATATATATAGTATAATCAATAAAGTTATATATATAGTATAATCAATATTCGCCCTTAAAAAAGTTATTAAGTTAAGTTTGTTTTTTTATTCAGTTTCATTCTGTTACGTAACAAAAAAATAATAAAAAACTTCCTTAAAAAAATAATAGTAAAATCTCAGTTACGTGTGTTACTTTAGTAAGATAAGTATATAACAATTTTGTTACTCATGCACCGTCAAAGATAACTAACATTATAATTAAAATATATGTTTTGAAAAAGTGGATCCAGAGAGAATCGAAGGAGGTTGCATAAATTCATAAGCTCCTTGTTAAGCCGGAGGGTAAGTTGAAAATTTAGGCTTATTGAAATATGACATAAGCAGCTTATAAAACTATGATAAGCT…
MsMYB041	MSAD_234746.t1	Medtr1g111830.1	At5g04760	At1g06780	PubMedID:27117388	MSAD_254903.t1	Medtr7g096160.1			√				√	√							√		TGATATGTCAATATTTGTCTCCAAAGAACATGTCCAATTAAGGCTTTCATCCTAAAAGACCAACTCATGACTCAAGTACATCTTCTCTAAACTTAAAACTTAAGACTCGCATTTTATCACTGACTTAACCATTGTAATGTTTGCAGGTCACTCCTATGTGCAGTAACCACCATCTTCAATCACTCATTTGTCTCTTAGGTCGCCGATCTAGTCACCTCAAATCACTTTTTTTTGTTGTTGTTATTATTACAAATGACATATCATTTCATGTACGCATTATATTAGTATATTTTTGCATTAAAATTATCTTTTCTCGTCCTTTGCCATACAAAATTGTGTAGTAAAAAAATATCGATCGTGTCTCCAAATATATATCTCCAAAAACGTCATAATTTATGA…
MsMYB041	MSAD_234746.t1	Medtr1g111830.1	At5g04760	At3g62910	PubMedID:27117388	MSAD_285138.t1	Medtr7g108300.1								√					√				TAGAAGTTGTAAAAATATATTTCTAAAACACGAATATAGTGTTTTAGGAAAAAGGTAAAATTGTTTTAGTATGCTTAACACTATCCAAAATATGGTCCTCTATCACAACACTATGCTTAACTAACTAACTCCATCACATTAGTCTTTCTTTATCTATAAGTATCACCACAACATTGACATGTCCGTTTGTCCATTTTTCACAAATGAGGATCACAAAAGATTCTATATCATAGCAAAAGTTAAGTTGTAGCCAGAACTCTATCATTTTGTATTATTATTATTTTAATTTGAATTTGATTTAGAATTAGTCTAGATTGATTCAAGGATTAGACTACATTTGATTTAAAATTTAAATAAGTAGTATATAAAATTTGAAAAGTTTAACTATCTGCGCTTGAA…
MsMYB041	MSAD_234746.t1	Medtr1g111830.1	At5g04760	At1g08930	PubMedID:27117388	MSAD_223636.t1	Medtr7g113960.1	√	√	√	√					√			√					TATGCAAGGTCCATTATTCGAATCATTGGCACCACACACAAAAAAATGCAAAGTATAATGTATTGAAATGGAAATGATGAAAGTAATATTAATTAGAGATATAATTGGAAAAAAAGTCATTAATATTGTATTAAAAGGAAAAATAAATCATTTATTTTGTGACAATTTTGTTTGCAAATGACTCACTTATTATAGAATGGAGGGAGTATATTTTCAATATAAAGGTCAAGCTAGTTAAATCTTTAAGGCACTTTATTATACATGTTATAACTTGACAACATTAAAGTTAGGGGTGGGAAAAAAACAGAAAACCGAACTGAAGTCCTGAACTGAATCGAACCAAACCAAAAAAAAATTGAATTATTATTAATAATTCTGAAACTGAACTGAAACAGTTTG…
MsMYB041	MSAD_234746.t1	Medtr1g111830.1	At5g04760	At1g73020	PubMedID:27117388	MSAD_312176.t1	Medtr8g015550.1			√	√			√	√						√		√	TGTGTAAATCCTATTGTTGTTGAGGATATGTGGCGCCCTACGTTTGGCTTGATTTCACCATTTGTGTGGCACTTCCCGTTGCTCTTATTCATGCGTGTTCGGGTTTCTCAAAACATGTCTTCTCAATTTTAGCTTTCTTTGATTAGAGACACCATAAACATGAAGCACGAGTAATTTGTCTAGTTGTAAAGTTCTACTTAGTTGTGACTAATTCAACATTTCCCACAACCTTCGTAGATCTTAGTAAACTCGAGAAAGATTTGACTAACTCTTAATCGATTGTATTTGTATTCTCCTGACCTTTAATCGACTAGATAGTTTCTCCACCTCGATAGCCTCATTTTTGTTTTGTCTCTATGTAAATTTCTTCATAGACCCCCCCCCCCCCCCCCAAAAAAA…
MsMYB041	MSAD_234746.t1	Medtr1g111830.1	At5g04760	At1g72640	PubMedID:27117388	MSAD_325790.t1	Medtr8g019510.1	√				√		√	√			√	√	√				CTTGGGTGTGGAGAAGACGCCTTTTAGCGTGGGAGGAGGAAGAGGTGAGGGAGTTTTCTGCTTTATTATCTAACATTGTTTTGCAGGAGCGTACTAATGATAAGTGGAAGTGGTTGTTAGACCCCATCCATGGCTATTCGGTGCATGGAGCTTATCAGTACCTCACATCTGCAGATGAGCCTACGGATAGGCACAACCTATCCAATGTTTGGCAACGACAAGTACCTCTAAAAGTTTCACTCTTTGGGTGGCGGCTACTGTGCAATATTCTTCCAACAAAGGACAATGTTCGGTGTCGGCATGTCATTACATCAGATAATACTTTGTGTGCCGATGGTTGTGGCTCTCAAGAGACGGCGAAGCATATTTCTTTTGGCTGTGCGACTCTGGGATGTGTAT…
MsMYB041	MSAD_234746.t1	Medtr1g111830.1	At5g04760	At3g61950	PubMedID:27117388	MSAD_260848.t1	Medtr8g024210.1		√	√	√			√	√			√					√	ATGCTGTTCGGATTCTATAATCCGTACCGTATAGAACGCGTGAGAAACTTATAGGATGAGAATAAAATAGTTCAAATTTTATATCATTCTTGCAGTGTGCCTTTATATGTTTAATTGATTCTAAAGGATCAATGTATATGGTTAATCTTGGTGATTTGAGATTATGGATTGTTTGCGTGTCATATATGGATTGTTTGCGTGTCATAATATAGAAATTTTGATTTAAGTAGCTTCTATACACTACTTTTCTATAATAAAAAAATTACTCTATCCATTTTAAAATGAATGTCGTTTTAGTTAAAAAAAATTGTTTCAAAACGAATGTCACTTTAAGTTTCCAATGCAATAATAACTTTTTCTTTTCAATTCTACCCTTCAATTAATACTATGTTACACTTC…
MsMYB041	MSAD_234746.t1	Medtr1g111830.1	At5g04760	At4g28080	PubMedID:27117388	MSAD_224641.t1	Medtr8g027685.1							√	√				√					TCACAAAACAACGTGTATAAGGGTATTCGAGGACTTCCGATCACAGCTATCGTGAAAGCATCATATTACAGGTTGGCGGCCTTGTTTGCTAAAAGAGGACATGAGGCAGCGGCAAGGGTAAATTCTGGTGAGCCATTCTCCGAAAACAGCATGAAATATCTCAGGAATGAGGTGATTAAATCCAACATTCATCATGTCACTCAGTTTGACCGAGATCGATATACCTTTTCCGTCCGTGAAACCATCGATCATAAAGAAGGATTGCCAAAGGGAGAATACAAAGTGGACCTGCAAAATAAATGGTGTGACTGTGGACGGTTTAGAGCGTTACACCTACCATACTCACATGTCATTGCCGCATGTTCTAGCTTTTGTCACGACTACAAGACTTTTGTCGAT…
MsMYB041	MSAD_234746.t1	Medtr1g111830.1	At5g04760	At1g01360	PubMedID:27117388	MSAD_224673.t1	Medtr8g027805.1							√	√				√		√		√	TATATAAATTATTGTTAAAATTTAATGATATAGAGTTATTGTAGGGACCCAATTAATAATTGTTTTGAGGTGCTGGACTAGAGAGATTAGATGTTTATTAAGTATTAATTACAAAACGAATCATGTGCACCGTTGGGACCCGTTTAAGCACCCAGATGAGGTGCTGCATTGTGGATGGTCTAATATTATGTAATTTATGATCAATTATGTACTAATAATATGATTTTCATCTATCTCAATTGAAATAATATCCAAATTTTGTGTCTATTGTCATGAATTGTATTTTTTGTGGGCGTAATAGTATTTCGTCATAATTGTAACGGTGTTTCGTCGTGATTTTTGTTCACTCTGTAAAAACGGTAACGTCGGCTACCTATATCTTTTTTATCGCGACCATTT…
MsMYB041	MSAD_234746.t1	Medtr1g111830.1	At5g04760	At2g45690	PubMedID:27117388	MSAD_233450.t1	Medtr8g033040.1	√		√				√	√			√		√				TGTTTTGGTTTGGTTTCATGTGTTTGGAAAGTTATAAAATGAATACTATTTTAGTGATTCTAATATACATGTAGTTATGTCTTTTTTATTTTCAAGAGTCTAGATGGGAACAAACATTAAGCATAAAGAAATAGAAAATCATGGGTTCAAATTCACGCACCAGAATATCAAATGTATTATAGACTTTTACTATCAGAGTTGTATTTAGGTCATTTTATTGTGTATTGTGTAAAAACTATATCATATCATAATAGTAATTTTTTTTACTGAAGTTCATATCATAGATTCATAGCACTATTTTGTTTAGGCATGCATTTTCTTGTTTTCTTGGTAATTTATGAGTTACCTAAACCTAACTTATTCTCTCCTTTTGTGAGAGTTTGAATCTTCTCTTCTCTT…
MsMYB041	MSAD_234746.t1	Medtr1g111830.1	At5g04760	At3g14740	PubMedID:27117388	MSAD_291910.t1	Medtr8g042510.1			√	√			√			√	√		√				TGGCATGTATTACAATAACATCGAATCATATTATTGGCATTGAGAATGCCCAAATATGAGGGACACTATTGTCTAGAACAGACAACAATAGTCTAACATGATCAAACCAAAATATGGTAGTTACCAACCATTGTTAGTGCTATACACATGGCTTGGTTCAGGACACTACACCTCAAACAAACAAATATCCTATAAAGAGTGTCTCTGATAGATAGTCCCAGTCAACTTCCTACTCTTTCATCCTCATACAAATATCTCAAATATTTGATCAATTAATCATAATTTATTGTGAATAATCTTTAAGATTAAAGGATAATTATGACTTATGAGATATTTACTGACCATTTCTTACTTGACTTCCTATATAATCATCTTTCTATGATAGGATTATGGATTAAT…
MsMYB041	MSAD_234746.t1	Medtr1g111830.1	At5g04760	At5g66590	PubMedID:27117388	MSAD_282564.t1	Medtr8g078770.1	√	√	√				√										TAGCACATTCCATTTGTCCAATTAATTTTCGGTAAAAGCTAATCTTTTTTGAGAGATATTATTTTGACACGCAATCATTCATTCGAGTCAGATATGATTCGTAAATTTAAGGATATCAGACTTCATTTTAAGAAGGATTCAAATTCAAAATCTCTAATTACCTGTAAATATAAAGATATCAGATTTTATTTTACGAAGGATTCAAATTCAAAATCTCTGATTAAACTGAAAAAAATACATTAACATCTTATTATTGTAATTTTCTTAAGATAAATTATAATTTGAAATAAAAGTTTTGGCTATTTTGATTTCAAACGACATCATTTGATTTTTATGCATGTATATTTTTAGATAGACGAAATAAAAACGGTCATTAAAAACTCACATATAAAATGAAGA…
MsMYB041	MSAD_234746.t1	Medtr1g111830.1	At5g04760	At1g17210	PubMedID:27117388	MSAD_238103.t1	Medtr8g079465.4			√		√		√	√				√					ATTTAACCGTGAATATCCCAAAATCTTTGAGCTCCCACCTCCACCTGTCCTCCTCGTCACTCCACGTCCTTCCCTCCAAATCCGCCAATAATTCCACCGCCAAATGGTCCTCCCAAACAAAAAGTGTTCTACGCCAAAGGAAAGTCCACTCCCCATCTGACACCAAATCTCCGATAGGAGCCTCCTTTTGGCTTGATAAGGAGTAAAGTCTAGGATATTTGAGTTTAAAGGGCATGTCACCACACCACTTAACCTTCCAAAAACTTGTATTTAAACCATTCCCCACTCTTCTTCGGAGCTCCGATGTGAACCACCTTTGTCCCCCAAACTTGTTTCTTGAAATTGAGATTTGTAACCTCATGATTCTAGTTCTGGGTATCTCTCACCTGTTAAATGCAA…
MsMYB041	MSAD_234746.t1	Medtr1g111830.1	At5g04760	At5g66880	PubMedID:27117388	MSAD_308175.t1	Medtr8g079560.1	√	√	√	√	√		√	√				√					GCCAAAACAGCCAACCAGTTATGGAATTATGTTATTTGGTGCACGCTGAGATACATCCAAAAATTTCTTGTTTTGGAGCAATAAAATAGTGTAGTATATAATATTTTTACATAAAAAGTAAAGTTTAATTTGCATATATACATTAGTGTAAAAAGTTTTAAATTGTTAAGGAATTTTTTTAAAAAAAATAGTATTAAAAAAGTCAAACACAGTCATAGTTGACACCGTAAAATATTTTTACATTGAAGTGTATATAAATTAAGGCAAATGTTAACTTGTAAGTGCACATGTTAAAATATTCATTATAAAAATACACATATTAAAAGACGTGTATTTAACTTTTTAAAAGTTGTCATATTGTATTTTCTAATGCAAAATTATTATTTTTAAGTTGTTTAA…
MsMYB041	MSAD_234746.t1	Medtr1g111830.1	At5g04760	At1g29280	PubMedID:27117388	MSAD_247505.t1	Medtr8g087000.1			√		√	√	√	√			√	√		√		√	GGATCTGTGCCTCCAACTAGGTCAGCTGATCCACCGTCTCCATCAAATACTGTCGGATCTGACCAGGTTTACAATATTTCTGATTTACTTTATTCAGATAATTTACTCAATAGGCCTTTAAAAAGAATAGTATTTTATGACTTATCTCCTTTAGATGCGTTATTTGACAGCCAAATAAGGGTCCGATTCTTTATATTTGTACATTTTAAGATAAAATGGTCCATTCCTTTATGTTTGTGCATTTTATTTGTTTTTGGCTGACATGGTTGACAAGGTTGTTTATGTTCATCATTGTTGCAATGAAATATTCTCTTCACAAAATTTCAAACCAAGTTATATTTTTATTGATGTCCTTTTTGCAAGAAAAAACCATTTCCATTAGGTTTAAATTTCTTTCTA…
MsMYB041	MSAD_234746.t1	Medtr1g111830.1	At5g04760	At5g65110	PubMedID:27117388	MSAD_316540.t1	Medtr8g090375.1					√	√		√									TTGGCCATTTCATGGGCTACTTGTTGGATATATAATCCTAACTAAAATATCATTGTGAATTAATTACTTTTAAAATACAGAGAGGAGTTGAACAATATATTTTTTTCTTTTAATTTATGTGTACTAATAATATAAAAAGGATTTTACAGATTTTTAATTGCATCTGACAAATTTTTTTGAATGATTTTAACAGTTTAAATATGACAAAATATTTTTTTACAGCCTCGTCACAAAAGATATTGGGAAAAATAATATGGAAGTGTTTTTCTCCTAAAAGAATTTTAAAAACAAAGGAAAGAAGATGGCGGGCAGCTGAGAGTGGTCTAATTGCTTATCTACAAAACTTTATGGTCAAATTAATTATTTTGGACGGTCAAGTTAATATGGCAAACAAACTTC…
MsMYB041	MSAD_234746.t1	Medtr1g111830.1	At5g04760	At5g65207	PubMedID:27117388	MSAD_332615.t1	Medtr8g091590.1			√	√		√	√	√		√	√	√		√			TACGAACTGTTCCGAAACATGCCCATCTGATTTGGCGTTTACTTCATGCTCGTCTTGGAGTTAAAATGGCTCTTTTTAATAAAGGAATCAATTGCAATCCACAATGTAGTTTTCGTGATAGTCATATTGAAACCATTGAACATTTATTCATGGAATGTAAATGGGCACAGTCTGTGTGGTTTGTGTCTCCGTTGGGCGTCAATTTTTCTAGCACCACTGCTCCTGCTAAAAGCCATTCCGCCCATTTCGTCAAGATAAAGAAGACTATATTATACGAAGATGTAGAGATTATCCAAAATGGTGATGGCTATTTGCTATGAAATATGGTGGAGTAGAAACAAGAGATGCTTCGAAGGAATTGAAATTCCATGTGCTGTCAGGTGTTGCAACAAGGCTTTA…
MsMYB041	MSAD_234746.t1	Medtr1g111830.1	At5g04760	At1g48880	PubMedID:27117388	MSAD_275686.t1	Medtr8g093530.1		√	√	√			√										CATAACATTGTTATGCATAACCCTTTAGACTCTATGTAGAAGGTCAACTGCCTCTGATGCTAGGAAGTCAAAAGTGTCAAAAACAAATGGTATAAAAGCATGTTGATTGTCAGAACACGTTTTCTCATGTTTGGCCACTTTGCTTGACGCAGCTTTTAGGGTTGCCTGTCCTACTGTAAAAGCCCCCACCTCTAAACCCACAAGTGGTGAAACCCCAGTCAAGTCCACACATGCATGTTTTCCTCCAACTCATCCGTACACCATAACATATGCAGGCCTAAGTGTTGATAATTTGGTTTAGAAGTTCAATCTCTAACCTTAACAAAAAGATTTGGAGATTGGACCTATGTGTATGAAAAAAATATGCAAGGACCAACAAATAGTTGAATGGAACTCTCC…
MsMYB041	MSAD_234746.t1	Medtr1g111830.1	At5g04760	At5g64630	PubMedID:27117388	MSAD_332757.t1	Medtr8g093540.1				√	√			√	√								TCTTACAGGCCGCGGCATCCCTGACATCATGAAAGGATACTGCTTAATCATTGCTATCACTTCCTTGACCTTCTTGGCAGAATCCAATTCCACCAATGCACATTGTGGCATGCTGCTTGGTCCTAGGTAGTTGGGGATAAACTTGACACTTTTCACAGATGCAAACTGGTCGAGCGCAGTTCTAATCACAGATTCCGTAACTTGTGGAGACATGTTGTCAAAGTACACTGTCCTTTGAACTTTCTCTTCAAATGCAGCATAATCTTCAGCTGACGATTCCATGTATCAAGTGAATGAAACCTGAGAATAAAAAATTTCTTATGTTAGGGCTAAAGTGAATGAAACTAAACATTATGTGGCAAGAGTCCAAAAAGGAAATAAACTTAATGTTGCAAGGGA…
MsMYB041	MSAD_234746.t1	Medtr1g111830.1	At5g04760	At4g29430	PubMedID:27117388	MSAD_270921.t1	Medtr8g101910.1			√	√				√		√					√	√	ACCATGAGTATTCTTACTACCGCCTCTCCATGCTGATGTTGAGTGTTTAACGTCTCTTCAGACGATCACCGCGTTGTAAGGCATTATTCCCAAGGTGAGAAACATCACCTTCTTCATTCTCCCAAACAAGACCCCACCAAAGCACCTGCATCCTCAATGTTCTCCAAATAATCAGGAATATTTTTGAACTCTGTAAGTTGCTCCATGATGGACTTTGTCTCCACCATCTTGAATGAGTAGAGTTGTTGCTTTAAAAGTTGGCGATGATCCAAAGACTTTGTCATATATAAAGACTCCAACTTTGACCACATCGATGTCGCGGTTGGTTCCTTCACTACATCTCTCAAAACTTTATCTCTGAGGCACAAGACAATGGCACTGGCCTTGTCCAACATCTCA…
MsMYB043	MSAD_235749.t1	Medtr4g107230.1	At1g74840	At1g46480	PubMedID:27117388	MSAD_286864.t1	Medtr1g019130.1	√		√			√	√	√							√		ACCTTTGATATCTCTAGCATACCAATATAATACAATACTTTTTGTCACTTTTGGTGTGAACTCAATTACATGCCTTGTGTTAACCAAAAAACAGATCAAAGGGACATGTTTTGTTATACAAATTAAGTTAATTTGATAACCACTTATATCTTGCCTAAAATGATGACCGATGGGCTTGTATATCCAACAAAGAAGGTGTGTTAATTAACCAAATTAGAAGGGCAATTCGGTATACTCATTTTTAATCAACAAGCTCTCGGCCTATGGGATAGTTATGCTCCTTCAAATTAAGGTAATGCATGCATGTTCATGATTATAAGAAATGAATACATACATGATGGATTGGAAATTGAACATCAGTAAAGAATAATATATATATATATATTTAGCGTACCTATG…
MsMYB043	MSAD_235749.t1	Medtr4g107230.1	At1g74840	At1g21780	PubMedID:27117388	MSAD_311134.t1	Medtr1g029850.1	√		√		√	√	√				√						AACGACTTTAAAGAAAACAGTACAATATATTCCTCAAACCATTGACAACCCCTATAACTCTCATTTTTTGTTTGTCTTCAAATGCAAAGAAAAGTACCAAAAACATAGCTAAAAAATATCATCTGATGCTTCATCGTCAATCTCTAAAGTACTTCCTTGGCATGGAAGTAGGTAAATCAAAGAAAGGAATAGTGGTGTCTCAACAAAAGTATGTTCTTTATCTCTTACAAGAAATATGTATGAGTGGATATAGACCTGTTGATACTCCTATGGACCCAAATTTAAAACTTTGGGAAAAAGAGGACACATCTGTCGACACAGGAAGATACCAAAGGTTAGTTAAAAAATTAATTTATTTGGCACATACACGTAGGGATGACAAAATAGGTTGGATCCATC…
MsMYB043	MSAD_235749.t1	Medtr4g107230.1	At1g74840	At3g44990	PubMedID:27117388	MSAD_262433.t1	Medtr1g063020.1			√	√	√		√	√								√	TATGCCCAAACGGAAAAAAAAAAAAAAATCATATAAAAGTTTTGTATCGTTGTCTCTATGAGCATAATTTAGTTGATAAAAATATTGTTATATGTATGAACTAAAGTTTGAACTCTATATTCTACGCTTATTTGTTTAAGTAAAGATGAATTTCTAATTATTATGCTACTTGGCCAAAAATAAAGTCTTTGTATTACTTAGTTTATTAATTTACCTTTTTCATTGAGACGTTTTACAAATGTCCACACTCCACTGTTCATTAAATCACTTTTTAGTTAAGGACAAAACTGTTATACATCTAGAATAAAATTGTTTTCAAATTATCATGGGATTGTCTCGTATATTAGGTCACATTTTTTAAGATGTTTAGTGGCATCGACAAAAATTATAGGGTTAATA…
MsMYB043	MSAD_235749.t1	Medtr4g107230.1	At1g74840	At5g42100	PubMedID:27117388	MSAD_258180.t1	Medtr1g077990.1	√			√	√		√				√	√					TAAATAAATAAATAATCAAATTTATATTATTTTCAGTTAAATGGGACCAATATTAACACATTATTGGTTGTGACAACAAAAAACATCACATATAAAACAAACACATATATGTATATTATGTGAAAAGACAAATAAATATAGCATATAAAATACCTTGTCAAAAAAAATAAAATAGCATATCAAATATATTTTGGTAAACTACTTGGAGACGGATCTCCAGGGAGTAAATGGTATGATTTTTGTCCTCGTTCCCAAACTATCTATGGGAAAGCTTTCTCTCCCATCCCCTTCTCTACGGGAAAATACTCTATGCTTGTGGTACCTTAAGCAAGGCAACCTTCATGAAGATCTTTGTTTACATATACAAATAGACATTCTTAAATATGACAAGTCAAAGTT…
MsMYB043	MSAD_235749.t1	Medtr4g107230.1	At1g74840	At2g18196	PubMedID:27117388	MSAD_300257.t1	Medtr1g078090.1				√			√	√			√						GGTTGAGGGTATTTTGTTCATTTTCAGGTGTGGGAGAACAATTTTGTTGTTGAGAAGCAATTTTCATTCCGTAGTCACGCACTGATCAATCAATGTAACAACAATGGATGTGATAACGTGATCCTGCGCTCAATCTACTACTTCTGCCCCATAGAAGATGTTCGCTCCTCCCTTTCCAGTCATGACAACGCCTCTGTTCATTTTTTATTTTTAAGCCCCTGTTCCCATGCATGTCAAAAACATTGGGTATTACTAGTTGAAATTGTCATGACCTGAGTAATTTGTGTGTAGTTCATGCGTTAAGTTACCTGGTTAGGTACTATAAACATGATGCATTTGTTTGTTCTTCTTTCTTTTTGTATTTTTAGTTCAAACAAATAAGACAGTGAAAAACTATTG…
MsMYB043	MSAD_235749.t1	Medtr4g107230.1	At1g74840	At5g28646	PubMedID:27117388	MSAD_258042.t1	Medtr1g080690.1			√			√	√					√					CATAGGATGTTTGTCATATTTCTGCAATTGTTTCTCGATTGTTACTTTTCATGATTGAGGTTTCTTTCAAAAAATGATTGGTGAAGTTGTCATTGATGTCTTTTTTTTCATGCTCTACATTTGTTCATATTGAAATGAAAGAATATTTACTTGATGCAAGTAAATTTGATCATGTATGCTCATTTCATGTCACGATGCTTCGCTAGCTAGCAATATATTGGTTCTGAAAGTGTATGAATCAAATCAATTGATTGAATTCCAAACCCCTTTGCTAACACTTTATCTGCACTTGTCTGAAATGTAAAAAAGAAAAATTGTTTAACATGCAATTACTACTATCATCTCAGAGAATCCCAGCACCATGAATACACATGACCGATGAACTTGGTTGTTTCTATG…
MsMYB043	MSAD_235749.t1	Medtr4g107230.1	At1g74840	At3g62770	PubMedID:27117388	MSAD_305055.t1	Medtr1g083230.1	√		√	√	√			√									ACAATTACCTTAAAAATGAACAATATTCCAAGAAATGCAGACACAAATCACCTCAAAAAATGAAAAATAACATCATATGAAAAGTGAAAATAATATAATAGTTGTAAACATTAATCTTATCTAATGCATATACCCAAAGAAGAGAGCAATATTAAACCCTAGAAAAACCCTTGAAGCAAAATCATAGTGAATAAACAAATTGAAGGTAAAGGAATTCACCTGAGACTGAGTGAGGAGAAAATAAGAAGAATCAACGAGTTGAGTTTTCTTTGGAAGTGTGACTCTGTCTTTATTTTATCTGAGGGGAGGAGACAGTGACCGCTTGATTGCCAGTTACATCTCCACCTTACTATATAGGTATAAAATATTATATTAAACCTTCAAATAGTTAATAGTTTT…
MsMYB043	MSAD_235749.t1	Medtr4g107230.1	At1g74840	At2g31100	PubMedID:27117388	MSAD_291857.t1	Medtr2g015690.1	√						√	√	√			√		√			AGCTGTTTTATTAATTCTACAAGCTTTTCTATTGTTTAGTTTCGTGGGCGAAACTATTTTTAGGTGGATAGAATGTAAGACCCCAAAATTTTATTCATAATCATTTTGTTTCTATTTGTGAGAAAATTATTCTGGTATCCTTTGATTTGTTTGGTTGAATTCAGTCAGTTATTCCTTGAGAGCTCTTAACGTCACACCAAATCACTGAACCTTCAAACTCTGAGGTTCTCCGCCGTTGAATTGTGCATGAACGTCGATCTACCCGACCATTGTTTTAAATCTACACAATAAGAAATTAAAAACAATCAATGAAAAACTCATTCAAACATTTTATCAAACACTTAATGTGCAAATTATACATCGACTCTAAAAATCATAAAAACAACCCTAAAATTATAA…
MsMYB043	MSAD_235749.t1	Medtr4g107230.1	At1g74840	At4g18640	PubMedID:27117388	MSAD_239818.t1	Medtr2g016360.1			√	√			√	√			√	√	√				ACAGCACATTTTGAGATGCATGTGTTTAACTTTTCTACAATAATATTGTATATAAATTATTTAAAAAAATAATTTAATTTTTTATCATTTCATTATCTTTTCCTTACATTTTAGATTTAACACTTGCAAGTTTTTTTTTGAGAGGAAATACTTGAACTTTTTTTCTTCTTTCATATACTCACTTATTTGTGAATTCGGTCTCTCTTTCTATAATCACTCAATTTTGCCTCAAATCAGCTAGCTTATTGATTCAACAAGCTTACAATCCTTGAGAATAAGAATGTTGAATCTTGTAACTTGTTGAATGTAACTTATAACTTATTTTTTACCAAACATATCCTATGAATGTGTTTGGATGGATATATTCTTTTTTTTTAAAAGAATTAAGAATCATAGACA…
MsMYB043	MSAD_235749.t1	Medtr4g107230.1	At1g74840	At5g57070	PubMedID:27117388	MSAD_227322.t1	Medtr2g040580.1	√		√			√	√		√			√			√		GCAAAATGGTTTTGACATAATTTTATACAAAACATACTATAATAAGGACATTTGTGACTATTGAACCAAATCAACACTCTGAAACCATTTCCAACTAACATATACAATTTTTAAACTATTTATTTGAGTTAATTTCGGTGAATGGTGATGATGATGATGATTCTAGTTTATTTCGTTTGGTTTCCTTTAAGAGTTAGGAAACAATTATGTTGAGCTACCGGTTAATGAGTTGGGACTTATGCAGTGTGCATAAGAATTCCTTATTCCTTATTCCTTATGCATGATAACTACATCCATTTCTAATGACTCTTTAATTGATTAAAAAAAACACACACACATTTAAGGATTAAACCGGCTAAAAAGCATATATCTGAGAATCTAAATGTCGGTGAATCACAT…
MsMYB043	MSAD_235749.t1	Medtr4g107230.1	At1g74840	At1g19200	PubMedID:27117388	MSAD_290433.t1	Medtr2g042970.1			√		√		√					√					TGTTTTTATTCTCTCTCTTCCTTTTTCTCTCTATAAATTTTTTGACCAATGTACAAAGAAAACAACAACGTTGTCTCAAAGATTGTATCAAAATGGTTGTTAAAATATCACTACTCTTAAAAGATAACCCAAATTACCTAGTGCTAGTGGTAAGGGTGTCAGAAATTTGATCGGAGTGTGAACCCCTGTTATGCTAGATATTGATTGATAAGCAAAATTAGGGGTGTGTTTATTTCCATGGAAAGATAGTGAGGGGGAGAGAAAGACAAAGAAAATAAGCATTTTTTATGGTTTGGAACAATTAAAACTAACTAAGAAAATTAGAATGAGACACATGGGTCCCACGCTAAAAACCTTTTCACAGCAATATGGACGAAAGGTTGGGGAAACAAGAACTTT…
MsMYB043	MSAD_235749.t1	Medtr4g107230.1	At1g74840	At1g79040	PubMedID:27117388	MSAD_233283.t1	Medtr2g064650.1		√	√				√				√	√					TCCTTCCAGATTACCCAAACGACAAAAAACCAATAACATCTATGAAGCATTAAACTCTATGCGAAAAACCCCTAAACTACCAAACTGATATATGTGCTCTTACACCCTGTCATTGGACGCAATATAGAAACTAAGCCAATTGAAAATATAATACCAAATTCTGCCCAAAAAATTACATTTAACAAAAATATGATCAATATCGTCCAGTTCGCCGCAATTCGCCGTGTAGCTTTGATCATTGTTAGGTATTAAGAGATGTGTATATACGTATTTAATTTGACTTTTCAAATTCAAAGGTAAATTAATTAAATTAGTTACGGTTTGAAGAAAAAATTTATCATATTTTTATTGGTATAGGTTTCGGTATGTTTGTTAAAAAAAAGGTTTGGGTATGTGCAA…
MsMYB043	MSAD_235749.t1	Medtr4g107230.1	At1g74840	At3g12920	PubMedID:27117388	MSAD_244349.t1	Medtr2g069350.1		√		√	√	√	√		√		√					√	GAGTTTTAGTTGGGGAATTGCTAAACGCATGTATAAATACATGTTAACAACCATTTTTTGTTTCCTTTTCAAAACACATGTAAAATGAAATAATTCTCCATAATTAGCATCAACTTGACGATGACAACAACAACAACCAAGCCTTATCTCACTAAGTGGGGTCGGTTACATGGATCAAATAACGCCATAGTGTTCTATCATACACCAAATTTGGATCCAACTCATTGACCTCTAAATCCTTTCTAATGGTTTCTCTAATAGTTTTCATAGGTCTTCCTCTACCTCTTTTAACTTGACTCTCATCCATTTGATCTACTCTTCTTACCACGACATCTACGTGTCTTCTCTCTACATGCCCAAACCATCTAAGCCTATTTTCTACCAACTTTTCCACTATAG…
MsMYB043	MSAD_235749.t1	Medtr4g107230.1	At1g74840	At1g04170	PubMedID:27117388	MSAD_226766.t1	Medtr2g069440.2					√	√	√	√					√				TGACGTCTTTGCCATTCCTCATATATCAATGTTTCTCTCTCACATATTTTAGATAAATGTTGAATTAATGGATGTAATTGTCACCCTTGTCGCTAAATGTGAACTCTCCAAACACTATGATTCAAATCATGATTTACCGCGTTATAACAAGTAATCGTAAAACTAGGCTCACTACACTCCCACCAAAATAAATTGACGCCTCGCCATTCATTGTTACTATATCTCAACATGTCTCTCTCACATATCTCATCTCGTATATAAGATAAGATGAATTACTAATAAATGAAAATGCCACCCTTAAAAGACTAGCACTAAAAGTTAACACCTCTCCGACAACCAAGATGTGAATCATGATTTGCCACGTTATAACAAGTAGCCGTTAATCTGAGCACATTACAT…
MsMYB043	MSAD_235749.t1	Medtr4g107230.1	At1g74840	At3g07565	PubMedID:27117388	MSAD_310910.t1	Medtr2g099155.1						√	√				√		√			√	TAAAAAAAATAAGGATGATAAGCCGTAAAAAAAAGAATGTCAGTGAATAATTTTTGGCAAACAAACTATAATAATACCAATAGAGAATTTTTGGTAAATAATTAATCAAAAAAAAGAAAGAATAAATTGTTTCTAAAATTAAAAATTAGATAATTTGTTAAGCATGTGAGCATTCAATGAATTGATGAGAGACGTCGGATTAAAGTTGAATTAATGGTTATGATTTGGTGTCAAATTTAATTTGACACCTTGGTGTCATTTGATCCTATCCTATAAATTTGACACCAAATCATAGTCATTAATACGGTTTTAATCTAACGGCTCCCATCAATTCATTAAGTGCTCACATGCTTGATCAAGTGATCCATCTTTTATTTTTAGAAATAATTTATTCTTTTT…
MsMYB043	MSAD_235749.t1	Medtr4g107230.1	At1g74840	At1g80080	PubMedID:27117388	MSAD_210075.t1	Medtr2g103940.1			√				√	√			√						TATTTATTTTATAGAAAGAAAATTGTTACTATTTTCTTTTTTGAGGGAAAGAAAATTGTTACTATTATTATACACTTGTAAAATTTATCTACTAAACTTTAGGAAAATGTTTTGGATACCTTGCTATACACCTTAAATTAAATAAAAAAGTAAAATGATATAGTAGATGTAATAGGTCTATGATGTGATATAAAAAGATAAAATAAAGTGTTGAATGAATGCTATTAAAAAGTAGGATGTTTAAATATTATGGTCTAAATTATATATCGGTATATACAATGTTTTTTATAAGCCTAAAAGACTTATAATAAATAATGGCTTTGTTTATTAAATTTATAAGTTGTGATTCATTGGTGTGATATATTGGTATTAAACAATTCATTGGAATATTATTATAAT…
MsMYB043	MSAD_235749.t1	Medtr4g107230.1	At1g74840	At1g16870	PubMedID:27117388	MSAD_328278.t1	Medtr3g031280.1		√		√			√									√	TATGCTAATGCGTATAATTTTTGTTAGTGTTGTGTAATGCGTATAATTATTTTTATAAAATTTTGATTTTAATTAAAAGTACAAGTGTAGTTGCCTAAAAAAATTATACTTATATATAATTTACACATTTGTATTGTAACAAACTATGCATATCTTTTTCTTATTAAAAAAACTAAACATATCTTTTTCAATGACACCAGCAATGTAACAAATATAATATTATATATATAAATTCTTATCTTTTTGACCAACACTAAAAATATGGTATTCTTATAACAAAATTTGTTATAGAGTATAATTGGAAAAGAAAAAACCAATTATTCTCATTATATATACACACATATACATATTATAGATATGATTGAGCGTGACGAAGAAAGCAATATAAATGAAGAAATC…
MsMYB043	MSAD_235749.t1	Medtr4g107230.1	At1g74840	At4g31520	PubMedID:27117388	MSAD_316165.t1	Medtr3g086350.1			√	√			√	√				√					TTATAATTTGCTTAGCTTATAGCTTAATTTTATCAAATAGACTTTAAAACTGACTCTTATATTATTATTATTATTATTTTTTTTTTAACAAGGTAAAATGAGATATATATTAACACATCAAAGCCCTGCTGCACAAGTGTGTTAAGGGAGGACAAAAATAGTTGTTACAAAAGCAGCAAACAATAGCGAGCTGCTGCAATACATCAAGAACAATTACAAAGAAATGCTGAGACAAAATAAAGGGTGTCTCTACCACTCATGATAATTGTAGGCAAAGGTTGTCAATTTAGCTTTGAACCATGTAAAAGAGTGTAATTTGATTTTATCTAGCAATCGATGAAGCTTCAAAGATTTGTTATTGAATATCTGATTGTTTCGTTCTTTCAAAATTGTCCAAGC…
MsMYB043	MSAD_235749.t1	Medtr4g107230.1	At1g74840	At1g28390	PubMedID:27117388	MSAD_306084.t1	Medtr3g100680.1	√						√	√			√						TATGTATATGGTTACAATTATCTACGTTCCCAATGTGCCTATGATGTAGCACCAGGAGGACTATTAGCTAGTGTCTATCATCTTACGAGAATAGAGTATAGTCTAGATCAACCCGAAGAGGTATGCATAAAAGTATTTGTCCCAAGGCAAAATCCGAGAATTCCTTCTATTTTCTGGGTTTGGAAAAGTGCTGATTTTCAAGAAAGGGAATCTTATGATATGTTAGGAATCTCTTATGATAATCATCCACGTCTGAAACGTATTTTAATGCCCGAAAGTTGGATAGGATGGCCTTTGCGTAAAGATTATATCGCCCCCAATTTTTATGAAATACAGGATGCTCACTAAATGATAAAAATAAGAAAGTAATCAGCACTTCGACAACCCCAGATATTCAAG…
MsMYB043	MSAD_235749.t1	Medtr4g107230.1	At1g74840	At1g09890	PubMedID:27117388	MSAD_235279.t1	Medtr3g111410.1		√	√		√		√		√							√	TCCTTTTTTTTTTTTTTTTTTTTTTTTAAGTAGAACCACATATTCTTTTCTTCTAATATTTTTTTTACGAGAATTCTTTTTTTTTTGTACTAACGTTGTTCTCGTTTTTTTTTATTTAATATTTTTTAATTGTATTATATATTAAAACATTATCAACAAATTTTGTGCGGGATTTTTTATAAATATATTTTATAAATCAGTTCTAACAATAATTTTTTTATAAATATTTTTATATTTTCGTAGATTATTTTATAAATCAGTGCTCTAGTATTTATGAATATCCAATATTTTGTCAGAAGTTTTGTGTATGATTATTTATGGTGTTTACGGTTACTAAGTTTTCATGTTTAATGTTTTATTAAGTGAATAATTTAAAAATCGTGATACTATTTTAATATT…
MsMYB043	MSAD_235749.t1	Medtr4g107230.1	At1g74840	At4g31500	PubMedID:25352272	MSAD_316759.t1	Medtr4g026050.1				√			√				√	√					AATATTGTCCACCACAATACAATATTTTGTTTTAAGTAAAAGTTGTCTAAAATACGAAATGAGTAGTGATATTTGAACAACTATTTGATACAATTTTTGTGACATTTTTTTTTCTTCTCTTTTTATTGGTTAAAAATAATGGAGAGAGAAAAACGAAGAGTTAGAATAAGAGTATAATGTAAGGATGAGAGAGAAAGTTGTCAAAAAGTGGTTGTACAAATATCATTTCTCATACAAAAGTAATCTTTTGTCCATCAAACATTGTATAAGACACCATTATTCAATACTATAAATATTAGATCATAATATGAAAATGCCAACCACATTTTGCATTCAACTTACACTTCAATACTTTCATAATATGAGACTTTTTTGTTTGAAAATTCGGTATCCGATCCA…
MsMYB043	MSAD_235749.t1	Medtr4g107230.1	At1g74840	At4g26730	PubMedID:27117388	MSAD_267123.t1	Medtr4g046723.1							√	√	√			√			√		ACTTGTTAGCAATAATCCTAATTTTAATTTCAGCAAATTGCCATCTTAGTCTCTAACTCTTCATCTCGCTGTCACAAAAGTCCTTGACTCCCTAACTGTGTACTTTTGTTATAGTTTTAGTCTGTGACGTTAAATAATTATGTTAAGTGATGATGTGACACAAGTTTTACAATGACATGACATATGAAGTGTCACTAAGACCTAAATGAGAGTAAAAAATGTTCACTTTCCTGAACTAAAAATCAATATCCACAAATTGAATTTCAAATCCCTAAGACTATGTTTGGAACAATATAGAGATTAAGGAAAGAAGACAGAAGGGATAGAAAGTTTCTTGAGAAACGTGTTTCCATCGTTTGGTTCCTTGTCAGTGAGGAAAGAAAGCCTGATTTTGATGGC…
MsMYB043	MSAD_235749.t1	Medtr4g107230.1	At1g74840	At5g59900	PubMedID:27117388	MSAD_225376.t1	Medtr4g075270.1	√	√	√		√			√			√	√					TTTAATATAAAACGGCAAAGTTTCCAACCATAACACATTTATGTGCATCATTAATTTTATTTTTTTTGACAAAATGTGCATCATTAATATTATTTTCTCCAAGGGTACAATATTTTCAATCGAAGTTATCTTGAACTTGCTATTGTTGACAAAATGACATATTTGTGATTATATACAAAATACCTTCATTAGAATTTGTACTAGGTTGTCAACAATTGATTGGTCAAAGTAGTGAGGGATTTGGTCTCCTTAAGCATATGGTTAGGGGTTCGGTTTCTGACTCATGCATATGAAAAAAATTCCCTTGAAAAAGGAGAATCCATTTTACGTATCACACATGTTCCCTGACAGAGATTAATCAATGCTAAACGATGGTGGACACTTCGTACTAATATCATA…
MsMYB043	MSAD_235749.t1	Medtr4g107230.1	At1g74840	At3g03120	PubMedID:27117388	MSAD_243147.t1	Medtr4g077640.1	√		√		√	√	√	√			√					√	TGATTCATCCTAGAATTTTCGTTGTACAGTAACCAACTGTTGAGAACGAAGAAAATGATTTTCCAACGTATATAGTTTTTTGGGAAATGCTTGGGTCACACATTCTTGTAACACACTCACTCCAATAAAAATTAACCATGTCAGTTACTTTATTTTATCCTTTACATGTAACCGGATTAACAAGTTGTTTTGATTTTGTTTGTAATTTCTTTTTATTTTCTTATTAAGAATTTAACGACAATATTGTCTTCTCAGCAAGCTCCATCCTTCTAATCTTTCCATTTCTCCTTTTCTAATTTGTATCAGAACCTCTATCCATCGCAATCTCTTTCATTTTTCACAATCTCTATCGTCTTGCTTGTGAGGTTTAATCTTGTCATAACTTGTGCTCCATCACCC…
MsMYB043	MSAD_235749.t1	Medtr4g107230.1	At1g74840	At1g14000	PubMedID:27117388	MSAD_281083.t1	Medtr4g082325.1			√	√				√			√				√		TGCTATGGGGAATGGGGATGAACCTATTGCAAATGCAAATACAAAAGGAAACACAACTCTTACGCAAACAGACAGAACCATACGCCACTTATAGCTGGGTTGCCGCTGCTTGCTACAAACAAAATCCACAACTGCAAAATTTCACGGTTTCACCAAACTAGGTCTAAAAATTCGTCTTTAGATAACAAGAAATAACAATCAAATTTAGGGTCAACGGAATTCACCTCAATCAAATGAATAATAATCGAACATGAGACGAGCCGAGTTTGCTCATGTCCACATAAGTTCACAAAGTTCGTGAGAGTGTTAGAAACAATCAAAGTTAAATGGAACTTGACAACTTGACATTTTACTCATGTTTCATATTTATAGAGCCGGTAACCGAAACGACTAATTACA…
MsMYB043	MSAD_235749.t1	Medtr4g107230.1	At1g74840	At1g69420	PubMedID:27117388	MSAD_281107.t1	Medtr4g082560.2	√				√							√	√	√			TATGTTGTGCATTTGAAAATTTATTTTACTTCACTAAATCATACTTTCAACTCAATCCCCCCAAAGTTTAATTCATAGCTTCATCCCTGCATTAGGTCATATGTTAAGATTTCTTACTAAATTAGTCTTTATGTATAAATAGAGGCATTCAATGTTACTTTTATAATATTAATAAGAGATATATTTGAAGAAAAAAAAAGAGTTAAAAATTTTAGATGATCATATATTTAAAGACAAATAAATTTTTATAAATAGAGAGAGGAAGTGTTTAGAGATTTTTATTTTTTTTTCTCAAGAGATTTTGGGTTCGATCCCTAGTGAAGTCGCCAACCCCACCTCACAAGCCGGTTTTGTGGGATTGTGTTAGGCCCAATCACAATTTCTAAGATGATATCAGAG…
MsMYB043	MSAD_235749.t1	Medtr4g107230.1	At1g74840	At5g65760	PubMedID:27117388	MSAD_258505.t1	Medtr4g097590.1					√			√			√	√	√				TAAGTATGAGAGAGTTGTTTAAAAGTTATCAAAAAATGATTGTACAAATATATTTCTCTTAGACAAGTTAATGGGGTCCAATATCACTAACGTAAATATGTGTGCCCAACCTTGATTAACTTAGAAAAAATTTATATTATCTCATCTGTCTTGTCTTTCATTCCGGTCTATTTTCTTTCCTTCTTCAAGGCCCCTTCGGGTATAATCTCTACTCTTGAATCTATTTTTAATGCATTTTTTTGGGGATGTGAGAAATTTAGGAAAATCACTTGGATTAAATGGGACATTATTTGTTTAAAAAATGAGGATGGCGGGTTGGGGGTTCGGAGGTTGAAGAAGTTTAATCTTGCTAGGTTAGGTAAGTGGGTTTGGAGGATTTTAGAGGAGTCAGAGAGTTTG…
MsMYB043	MSAD_235749.t1	Medtr4g107230.1	At1g74840	At1g74850	PubMedID:27117388	MSAD_235747.t1	Medtr4g107210.1		√			√			√				√					AACCCTCTTCTTTGTTTGGATAGCTAATTTTCTTGCGATCTTTTGACGGATTGAGTACACTATATACTTTTCTTCAATTGGTGGATAAATTACTATTTGGACTTCTCTCTTTCTAATAAAATTAATTTTGATGTTGAAAACAATATACATAAATTTGCAACCTACAAAAGTTTCAAATGATCAAATCATAATTTAAGTAGATATCTTTCATTTGATTTATATTGTATCTTTGACAAGCATTTGAACACCAATAAACCACATGCTTGATGGTTCATCTTAAAGTTGACGGAATTCTTTGCAATGCGATTGCAAGGTTCAATGAAATCATGGTCATTGAAAAAAAATAAAAACATTGAGAATTAAATTTAGAAATCAAGAGATTAAATGTTTAATGATATA…
MsMYB043	MSAD_235749.t1	Medtr4g107230.1	At1g74840	At5g57345	PubMedID:27117388	MSAD_307522.t1	Medtr4g127690.1			√	√			√	√		√	√					√	TATTAATCCAAATTTTATTTATTCTTTGAAGCCACTTTTGTTGGTCGTTTTCTAATTGAAGTCGCATGAGTAGTCTTTTTTGAATGAGTTTCACAAAGAAAAGTAAGAGAATTAAATGATATCAAACGTTTTTAGCGCTGAAGCAATTCAATAGTCCTAAGTGATATCCTTCCATTGATAATGATAGAGTGTGACAAGTTAAGAGAGTTAAATTTGATATAAAAAATTGTACATCAAGCCAATAAACTAAATTGTTATTGCCTACTTAATTATCTGATTTGTCCTATCAGTGAGAATCCTTTGTATTTCACTCTTAATTACAAATAATAGAGATTTTATTTGAGATTGAAGCAAAATGTGTCAGCAGAAATAAATATTGAAGGAAAAAATGCCACCAAC…
MsMYB043	MSAD_235749.t1	Medtr4g107230.1	At1g74840	At1g62560	PubMedID:25352272	MSAD_210786.t1	Medtr5g012130.1		√			√	√		√				√	√		√		AATAATATATATTAATCTCTTGTCTCGTGTATAATAATTATTTTATAATATATATTAGTGATGACAAATCATAATACTTATGTCCCCGTGAGCTTAGCTCAGTTGGTTTGGATAATGCTTAATATATCCAAGGTCCGGGGTTCAAACTCCGACCACTAACAAAATATGTTCAATACTTATTTTAATTTAAAATTTTGCGAAGTGACAACTTGTCTCGTTTACAACAATTATTTTAAAATTCTGAAGTGATGAGTTGACCTTTGTATAATATATTTTGTCAATCTTTTTTAAAACTTGTCTCTTAAACTATTTATACCTCGTCTGTTACTGCTTCACTTCAAATCTATACACATCACTGGGTAACATTTGGGTGACATAGAGTTTGGTGACATTGGCCAA…
MsMYB043	MSAD_235749.t1	Medtr4g107230.1	At1g74840	At5g66700	PubMedID:27117388	MSAD_265548.t1	Medtr5g019680.1			√	√			√	√						√			ACTCATGTGAAGAATAAAGTTATAGTGGCAATAACAACCAAATAGGAATTGAGTTAGAGACAAATCAGAATCCCTCAAATGAAGGTTCTGAAATGTATATATGCACAATAGCATTTTAAACCCAAAAAAAAATATATATATATCCAATTCGAGAGGGTAGTGATTAGTGAAAGTGGAGAAGTAATTTAGCTCAGAACTAACAATGTGAAATGGAGGGGATGTCAGTGTTTAGTTGAAAATTAGATGAATTGTTATTTAAAAAGACTTCGGAAGTCAATGTAATTTAAGTTAGTAATACGATTAAGAGTCACATAACAGAAGAAATATATGGAAAATTACAGTAGAAAAAAAGAAGTGAGGTAGAGTAGAATATATTTGAGAGTAATAGAGAACATTACA…
MsMYB043	MSAD_235749.t1	Medtr4g107230.1	At1g74840	At2g17950	PubMedID:27117388	MSAD_270015.t1	Medtr5g021930.1			√	√			√	√			√	√				√	GGAATGAAAGATATACCTCACCATACCTGCCTAATAATAATGTCAAAGAAACTTTTATTTTGACCAAAATGTCAGTGAAACTTATACGTTTTTATTTCTTTTGATGGAAAATAAACTTATTTATTTGTTTAAATTGATGGTATGAATGAATCATACACATGCCATTATATTATATTATATTGTATATATTTTTCAAAATAAATTTATTTGTGTAATAATTAATATCATGAGAAATGACTAGCATAGTCATAGAGAGCAATACCAAACAAAGCTTTAGATAAGTTTTGCCCATAAAACAAACCAGGACATTAATTATTAATTAATCAATAATTTTACTTTCCAACAATCATTAAAATACTTGTAAAAAAAAAATCATTAAAATATCATATAACAGACAAT…
MsMYB043	MSAD_235749.t1	Medtr4g107230.1	At1g74840	At3g25855	PubMedID:27117388	MSAD_210637.t1	Medtr5g055190.1			√				√		√								AGTATGATTTATTTGTTTAGTTAAAATTACTATGAAACAATTTTGTCTAGTAATTTTTAAAAATCAGTTTGATTCTTAATAATTAAGAGTTTGATTCAGAGACAAGTAAAGTCTGAGGTAAAGATTGTTCCAACAATTTACTATTTTCTGAAGAATTTTGTAATTCATCAAAAGTTTTTACTATTTTCTAAAGAATTTTGTTATTCGCCAAAAGAAAAAAGGAAACACTTTTGTATAGTATTCCCTTAAAAAAAATTGTATAGTAGTAATTTCTAGGAATCTATTTTCTTTGGAATAACCCTTTGATTTTTAGATAAATGATTCCTAATAAATCAGAGTTCAGCCGTGAGAAAAGTAAAGTATGACATAAAGATTATTGAGCTAAATTCAAACTTGAAT…
MsMYB043	MSAD_235749.t1	Medtr4g107230.1	At1g74840	At3g47340	PubMedID:27117388	MSAD_311796.t1	Medtr5g071360.1							√	√			√						CCTATTTTAAAGTTCAACAGTAGTTTTGGTCCGTCCATCATATTTTATTTATATATTTAAAACAATTATTTTGGTAAAAAAAATCCTAAATTAACTATGGTTATTAATCATGTTAAGTAATGTGCTAATTAAGTTGTAAAGACTCTTCTCTCTTTTCATAAATAGGAAGGAATTTTGAAAACTAGAGACCAAGAGGTCTTTTCATATACAATTTGAGAAACAATGTAAGACGGGAACTTCTTCTAAGTTGTCTTATTGTATTTGTAGCAACGAGTCACAATGAAAATAATCACAATTTCAACAAAGTTCTAGTGATTTTGAAAATTATAACTCATTCATACACTCAAATATCAAATAAAGTGTGCCAAGTCATCATTATTATTGTAGAATTAAAAAGTT…
MsMYB043	MSAD_235749.t1	Medtr4g107230.1	At1g74840	At3g01180	PubMedID:27117388	MSAD_323439.t1	Medtr6g012380.1			√	√			√	√			√		√				GTTTCCCATTATATTAGCAACTGTCCAGAAATAGCTCATGGTACCAAGTTCCAGTAAGTGAATGATCTCTGTACTATACCCATGTTGGCATACTGAGGAATGTCTTGTAGTCATTTATTCTTGAAGAAAGAGTTGTATAATTGGATCTCTACTCATTTGTTATTTACAATACTTAAATTTGTTTATTGACGAGAAAATTCGTATTTTTTAATTGTAGTATTTAGTACCCGATTAGGCAGTGTAGTTTTATGGTTTGGTGAGACATTGTCTATTCAAAACTAGAAATTACAATAGTAATTATTTGGTGACATGTTTTTATCTTTTGAATGCTCTGTTTATGCTCAAAATAATTGTGTTCAATTTTTTAGCAAAAGCTTTTGAAGAAAATAATCTATCAAA…
MsMYB043	MSAD_235749.t1	Medtr4g107230.1	At1g74840	At3g01710	PubMedID:27117388	MSAD_240530.t1	Medtr6g022230.1			√		√		√				√		√	√			AATTTACATCTAGTAATATATTGATTGCTTTTAAATCGCTGTGAATTATCCTCAGCCTAGAGAAGCAATGAAGATAAAGAAGACCCCGAACAATGTCATTGATAATGTTGAAACGTTTGATCCAATCTAGTGACTTCATTTTGATGTCATCTAGTCAATTAAACATGTATGAGATTTAAAAAGGAAATATTTGTTTATTTTAAAAGATAAGTAAAAAATATTTTAAACATTTAAAACATATAATATATTTACTTTAGTTAAATTCGCTATGTGAATAAAACATGTGAATAAGATATAATGTGTTTAAATTATATTTAGCTCATTTGGTATGAACATTGCATAATATATGCAGATATTGGATTTTGAACCATGGACATCCTCCTATTTCTCCTTAAAAGG…
MsMYB043	MSAD_235749.t1	Medtr4g107230.1	At1g74840	At2g38110	PubMedID:27117388	MSAD_285458.t1	Medtr7g067380.1	√	√			√		√	√			√						TAATTCAATATATATTTCTTTTTTTTTTTTGTCTAAAAAATATTATTTAATTTGAATAAATAATCACTTTCATCTCTGACTCTGCACCTTGTTGTCACAAAGGTCCATGACTTATGACTAAATATAAAGTAGTTTCTGAATATGCACTTATGTTATCACTTTAGTCCCTGACGTTAAATAATTTTGTTAACTGATGATGTTGTTTTATGCCGACAAAGAGGTGTCACATGGACTAAAGTGAAAGTAGAAAATTATCACTTTGGTCCTTGAACCGAAAATTAATATCCTTGAAAATCAATATCCATGAACCGAAAATAAATATGTCCAAACTCGTCCCAACGAAGTGTTACTCTTCGACAAGAACTGGGTCATTTCCTTAATGAAGTTGTTATGTGGCTG…
MsMYB043	MSAD_235749.t1	Medtr4g107230.1	At1g74840	At3g04000	PubMedID:27117388	MSAD_260147.t1	Medtr7g094520.1			√				√	√			√	√			√	√	GTCACATAACAAATACTCCCTTCGTACCTTTTTACAAGACTACTTTATAAAAAAGTTTTGTCGTTAAATATAAGATTATCTATAAATTTTTAGATGCATTATTACTTTTTTTTTCTTTCAAATACACCCTCGTTAATATTATCAATATACTTTGAAATATGAAAAGTTAACATTAAGTATGTTATGGACAAAGAATAGTTTGATACTAATAGTAACATACATTTATGACAAGTTCATAATATTATCACATACTAGAGACCATGTTCTTCTATCATATCAAACCTTGTATTTTAATTGGTTTGTTGGATTTTTTTGGAAAAAAAATATTTTCATAATATGTTTTGACGACAATATTCGTCGGGTGGTTGGTGATTGAAGAAACACTTTATTTTGGCATGA…
MsMYB043	MSAD_235749.t1	Medtr4g107230.1	At1g74840	At3g12580	PubMedID:27117388	MSAD_256658.t1	Medtr7g099680.1				√			√	√	√	√	√						TTTATGTTAAATCCATTCATTTTTCTGTTTTAATTTTATAAAAGATAGGGGAAAATTTGTTTGTTTCTTTTTTTTGTTACAAAAGGGGAAAAAAGGGAAAATAAACCAAGAAAAGACAAGGAAAAGACTCAATATGTTTATCATTAGGGTTGGAGAACTTTTGTGCTTAATTGGGGTTATATAATTCGGATACATATAGAGACGTATATATATTGGATATATATCAGACATCAATACTTTTTTTATATTTGTACATACGTACTCACAAAGTATTTGAGCTAATTTTAAAAAATTTTAAAAAATCTTTTATCAGATGTTTATAAGATAATTCACCAATACTTAGAATATACTTCGCGTTATCTTAGAAAAGACGACAAGTGCATTAATCGACAAGACTTT…
MsMYB043	MSAD_235749.t1	Medtr4g107230.1	At1g74840	At2g39510	PubMedID:27117388	MSAD_256627.t1	Medtr7g100050.1				√	√	√	√	√	√			√					AAGCAAATTTTTATCCACAGAAACAACTGAAGTAGAAGAACCGACGGAGGCAGTGAAAGTTGTTGCATTTCTCCTTGGTGGCCTGATTGGACATTCTTTAATAATGTGACCTTCTTGTTTGTAGTAGTTGCAAACCTTTTTAGAACAATGGGAAGCAAAATGTCCAAGACCCTTGCAGCAGAAACATTGGACATTACTCATGTCACACCCTCTAGGTCTTACTAGAGCTGCATACACCACAGAAAGGGAAGCAGATTTATGTTGATCCATGGTTGTCTGAGTGAGGAGACGTTGTTCTTCTCGAATCAATTCATTAAGAAATTCATCCAAGGAGGGGACAATAGCTCTATTCATGAGATTAGTTCGAATGCCCTCAAAATCAGATCTCAATTTCATAAG…
MsMYB043	MSAD_235749.t1	Medtr4g107230.1	At1g74840	At3g11450	PubMedID:27117388	MSAD_324694.t1	Medtr7g109430.1				√			√	√	√		√	√		√			TAAAATTGAAGTTGTTTTGTTCGATATCTTATTAGTTTTTTAGCAAATCAAAAACACCTTAAATTTAAATATTTAATATTTTTTAAATTATAAATAATAAGTGATAGTTTAATTAATAAAAACAAGATTTTTTTGTAAAAAAAAAATGATAAGAATTAATAAATGAGAAATAATTCAATCTGAGGTTCAAACCTCATTCTTTAGTTCCTGCATATATTATATAATATCTCTACCTTCTAAGTTAAATTTACGAGACATCAAAATGTTATCAACCAGCACAAAAATCAAAAGTGTTGTTGAAAAACACTTTATACGGACTTAAAATATCTTTGACCTTTTTTAAAAATGATTTAAGAATGATTTAAAAAAATTAGAAATATACTTTACCGGCTTTTTGAA…
MsMYB043	MSAD_235749.t1	Medtr4g107230.1	At1g74840	At4g11880	PubMedID:27117388	MSAD_250872.t1	Medtr8g033220.2			√				√	√	√	√	√			√			TTGGTGATAAGACTATTGATCAACATACCCTACTACTTAGGCATGTATGCGATAAGTTTGTGTGGATGTATGCAAAATAGACGGTTAATAACAAGATGTATTTGATAATGAAGATGTTAAGTTTGACGCCTCAAGATGGATTAGGCATATCATTTCATTACTTTCCAAGGAACTATGAATCAACTTTCTGCTACAAGTATTAAGTATGATGACGAAGTTCAGGGGTTATTTCTTCTTGGTTCCTTGCACGAGTTGTGGAAATTTTAAGAATGTCATTCTATAATTCTTTTGTTCATGGTGTGTTGTCAATTGACCTTATTGAGAGTAATATTATGAATGAGGAGACGAGAAGAAAGTCTCAGGTTCCATTTCACATGTAGAATTATTGGTTACTAAACA…
MsMYB043	MSAD_235749.t1	Medtr4g107230.1	At1g74840	At3g20050	PubMedID:27117388	MSAD_259096.t1	Medtr8g088270.1			√	√			√	√				√	√		√		CCTCACTACACTCCCCATCAATTTCTCCCCCCAAGCAACTAACTGACGCCACCATTTTCAAGCTTTTCCACTAAATCAAACAACCGCCAATACAATTTAAATATTATTTATTTCATTGAGTCTAAATGTGTAAATAGGAACTGATGCCCAAAATATCATAAAAAAAAAGTGTAAATAGGTATTTTTCTTCTTGAATTGAAACAGTCGATCGATGAAGTCCCTAAAATATATAAAATAGAAAATTAATCTCATAAATTAAAGAATAAGTTTAAATGCATAATATATGCAAGGTTCGGGGTTCAAACCTTGACCACCATAAAAAAAAAAAAAAAGAATAAGCTTAAATAGAGTTTTGACCCCAAATTTTATAATTGCTTGATTTTGGTCCTGCAAGTTTGG…
MsMYB043	MSAD_235749.t1	Medtr4g107230.1	At1g74840	At5g65110	PubMedID:27117388	MSAD_316540.t1	Medtr8g090375.1	√		√		√	√		√				√			√	√	CATCCCACTTAGGGGTTTTGATTCTCTCCATTGAAAATTCGTTCAGTTTTTCTCCATTTTCATTCTCCAGTTTTAAAACACACAACTACTTTTCTTTATAATTTAACTTTTATTTTCTCTCTGTCATGTTTGATGGTTGTGATTCAACTTGAAAAAAATTGAGAAATTTTTTAGTGGAGAGGATCTACACCCCCACTAAGATACGTTGTCAGTAACCTTGTCTATTACGATTTTGGAGTCATTTTCTACATGAGTTGTGTTTTTAAACAACTATTTTATTGACAACTTATGTGAAAACTATAAATTTATAAAGAAAAAGTATATATCGACATGAAAATCAAGACAATAAAGAGATAAAATAAAACATAATATGAGTATGAGAGAGAAAATTGTCACAAA…
MsMYB045	MSAD_237419.t1	Medtr8g042410.1	At5g06100	At4g27790	PubMedID:27117388	MSAD_299071.t1	Medtr1g007830.1	√		√				√	√			√		√				ATAAAAAAACATATTTTGCATGCAGATATTAATTGGTTTTTGTCAAACAAGCTAGTATTACAATTTTTAAATTTAGCCCATGATTTAAAATTATTAATAACCTTAATGCTTACTCAACCCCTTTTTTTTTTTTTTTTTTGTTATGTATTAACTCTCTTGTTTTTAAGAAATAAATCTAATAATTTAAAGTTCAATCCAGAGCCAAATAAAATTTCATCAACAATTATTTTAACTTATCTTTAAACTCCTGATTGTAATATTGTTGGTCAAACTCCGGACAATAAAATTTAGTATCGAGATGTAAATAAAATTTTAATGCCAAGTTCAACCAACAATATTTACTTTAAAATCGAGAAGTAAATAAAATTTGACCAATGAGCCTTCATTTGTTGGTTTAGT…
MsMYB045	MSAD_237419.t1	Medtr8g042410.1	At5g06100	At1g47056	PubMedID:27117388	MSAD_222451.t1	Medtr1g018790.1		√		√		√		√				√					CGTCGTCATAGTGCGATGTTGTTTTGTCTGTCGTCTTTTTGCGACGTTGATTGTCTTTCTTGTTTCGTTCAGGTATTTGTTTGGTTCAAATTGTCAGATCAGCTTCGATCCAGTGCAGATCAAATCAATGATTTTGAAGTCGTCAACGTTGAAGATCCAGAGACATGAATGTTCCGTAGACTTACATATAGTCATATGTGTATGCTTTAATACTTTGTCGTTTTATATGAATGAATATCATTTATTTTTGTCAAATAAAAACTTAATATTACTTATTTCCAGAAACTTAATATTACTTTGTTCATATTTGAATCCAGAAACTTAAACTTCTTTCCCATTAACTCAAATTAGTTGAATTATCCGACCATTAATAAAATTTATAAATTCATTGATACAAAC…
MsMYB045	MSAD_237419.t1	Medtr8g042410.1	At5g06100	At3g54560	PubMedID:27117388	MSAD_254988.t1	Medtr1g071040.1	√						√				√				√		TTGAGAGTTTATGGTTCTGCCGAATATTCGAAAATGCTAGTTCCTCATTCTAAAGTCAAAATGGCAGTAGTGTGTGAGATATTATTATCATCCAAGGAAGGGTTCTTTCAAATTTCAAACAATGGTAGATCAATTTGCTATTGCATGGAGTTGCATTTAAGATTCGAAATTATTACTTTCACTTAATATTATATACTTTAACTTGCTTGTATGTGTAATATTTGCATATAATTTGTTTCCTGTAACTTTGAATATTATTTAAGAGTACACATGTATCTATTCTTTATCAAATAACTCTTTTTTGTAATATTTGCATATAATTTTTTTTTTTTGTGCTTCAAAAAAAAGAAAAACTCTTTTTTGTAAACAAAATCACAAAAAATTATGTAACATTTTATT…
MsMYB045	MSAD_237419.t1	Medtr8g042410.1	At5g06100	At3g60840	PubMedID:27117388	MSAD_222605.t1	Medtr1g076700.1	√		√				√	√		√		√			√		CTTGAAGCAGAAGCAGTACTCTACACCCAAATATTTCAATGTGCAAATAATTCTAGTCAAGTTCAAGCAACATGGTCACTATAGTATAACATACAAAATTGACTTTTAAGAAAATTGCAAGCTCATTGAATTTAAAAATCTCTAAATTAGATTCAATTTGTTAAGGTATATACGATACAGTTATGTTTTGCATTTATGAAAACTTATTTTATGGTACATAAAAATTGTCAATCAAATATTGTAAAGCAATATATTGTGTCATTCAAATGTCAATAATAATGTCTTTTTTAAGGCAATAATAATGTCTTGTTTAATAATTTTTGGTGATGTTTAATGTCTTGTTTAGTAGTAGTTAAAGGGAAAAATCACCATGCACTTAAAGTGAATTAAAGAGGTTAT…
MsMYB045	MSAD_237419.t1	Medtr8g042410.1	At5g06100	At2g01320	PubMedID:27117388	MSAD_312596.t1	Medtr1g108340.1			√		√		√	√		√	√		√				ATTTAACAAAATCAAACATCAATCCGACCACACATTATGGAGAGCCACCTTGAGACATTTCTAAAGCCTGCTTGACTAACACTAACATGGGCAACATTCGTTTGGTTAGGAAAGGAAATCTCATGGTAGTTTCCAACTTTTTTATAGGGAAGCACACAACACGTCCTTTAAAAAATATACGAATAAATAAATTGATCCTTTTAAGAAAGGATAAATAAGGATTGTAAATAAAAAAAAGGATAAATAAGGTATATATTCTGAAAACCTAAGAAAACCACTCATTAGGATTATTTTTGGATTGAACCTAAATGCATTTTTTTTAATAAGTAGATAGATTCCTTCAATTGTGGGTAATTCTATCCATGACACTTTTAAATATTAAATATAGATGCTTCTCTC…
MsMYB045	MSAD_237419.t1	Medtr8g042410.1	At5g06100	At2g01080	PubMedID:27117388	MSAD_220591.t1	Medtr2g007830.1			√	√		√	√	√									GACACTGTTCTGTGAGTTTAACTTAGTTAATAAGCACATTGCATAAATATGTAAGGGTCAGCGTTCAAATCCCGCATACCCCCACTTCTCCGCATTTAAAATATGTAAGGGTCACTACACTAGTTGATAAAAAAAAAAAAACTTACACAGTCCTCGTGAGCTTAACTCAGTCGTAAAAACAATTTATAATATATGCAAGGTTCGAACCCTGGACACCGCAAAAAAAAAAAAAAAAAAAAAAAAAAAAAACTCAAACTCGTACTCTAGGTGTGGCTTTATTGTAAATTTGAATTCACCACTCAAACATATCAAATGTTTTTGCAACTTTTTTTTTCTATAAAACTTCTTAATTATAATTAAGGGATAGAGCTTCAATTAAATGAAACTTAATATTGAAAA…
MsMYB045	MSAD_237419.t1	Medtr8g042410.1	At5g06100	At5g45700	PubMedID:27117388	MSAD_271426.t1	Medtr2g017810.1		√	√					√	√			√		√		√	CTCTTCTCAAGAATCCTATCTATCCGATGTGGGACTAAATCCCCATGAGTGTTGGCCGCTAACATACTGTCATGTGATATTGGGAGATTCATGCACCCCTATCCGATGTGGAACTAAATCCCCTTGAGTGTTGGCCGCTAACATACTGTCATGTGATATTGGGAGATTCATGCACCCCTCTTGGTGTAAAAGAGAATACTCCATTGTCTAATTTCTCATATGTATATGAAAGAGAACTTGTAATTAAAATTCAACATATATTGTGAAAAATTTACAGAGATGAATATTCTAATTGATGAAATGGGAGCCAACTCTCAGATGCAAACATATGTATGAGAAAAAGGACCATGATGAAGAGGTTTAGTAAAAGTTTGTGGATTGATATCCGGAAGTGATAGG…
MsMYB045	MSAD_237419.t1	Medtr8g042410.1	At5g06100	At2g34820	PubMedID:27117388	MSAD_323937.t1	Medtr2g067000.1	√		√	√			√				√			√			ATTTAAGTGCTTAATGAGAAGAGTCTCAAATAAGCACTCTCTTTTTATGCAGTAGCACACATTCTTAATATTAAAAAATAAAATTTAATGATATAGAGTTATTAATAGATAATTAAAGAATTTTATTTAAAAAAATTATATGAGATGTTGGATTGAAGAGATTAAGTGTTTTTTAGATATTATTATTAAAAATTTATAACTAAATAATGTATACATGTGAATCCAAATAGATCTCTCCAATGTAGATGCTCTTGTTTGTTTGAAAAATAATGTATATATATAGTGTTTGGCTGAAAAACACAAGTAAGAGACGAAAATGCACATCGGCAATTAACTACCGTTGATTAAAAATTCATCGGCAGTTAACTGCCGATGGAGTTATATTAATAAATTACCGGT…
MsMYB045	MSAD_237419.t1	Medtr8g042410.1	At5g06100	At1g79110	PubMedID:27117388	MSAD_244349.t1	Medtr2g069350.1				√				√	√								TTGGGACCCACGCAAAGATTTTGTCTATCCCATTTTTTTCTATCAAAATTTTTATAATATGATAAAAAGAATAAGAAAAAACTTAATAATAAACCAAAAAATAATTATATAACAAATAAAATTACAATAATTTTCTAAAAAAATATTTACAATAAAATCTACGATTATTATAAAAAATGTCTTGTTCCACAGGTGATAGAAAAAAAAATGTGGGAGACAAAATCTTTGCGTGGGTCCCAGCACAGAGTACCTCACAACCCCAAGTTATGGGGTATTTAAATTTTTTAAAAAAAAAAAAACAAGAAACTACCTCACAATCTTGACTTGTGGGGTATTAAAAAAAAAATAAAGAAAGTACCCCGCAACTTGGAGTTGTGGGGTATAATAAAGACAAATTTT…
MsMYB045	MSAD_237419.t1	Medtr8g042410.1	At5g06100	At1g52890	PubMedID:27117388	MSAD_300324.t1	Medtr2g079990.1			√				√	√			√					√	ATCATCTTTCAAGTTCAATCTTTCCTAATTTTATCAATGTTCTATAGCTAGGAAACTCTTTAGATCTCATTAATTTGTATCAAGATTTCCCTAAGCCTTATGAAGGGATTTAAGGGCTAGACTTGCTCCAACTGTCTACCAGTAGAGTTCTATGGTATCAAGTATAATTTTTTTTTCCTTCAAAAAAAGAAGTATAATTTTTTTAGCAAAGACACGAAGTGAGCTTTTAATTAAATTTGTTTTGCTTATTAAGAATTAGAAGTGAATGTGATCGTTGAAATCACATATTGTTATTGGAAATTCAAAGATTTTCTAATGTGATAAACTATCGAACTCTTATACATGAACCACCTTAGGTGGCATACACCCTTTTACACTCACACACATTTGTAACATGTG…
MsMYB045	MSAD_237419.t1	Medtr8g042410.1	At5g06100	At2g42210	PubMedID:27117388	MSAD_257166.t1	Medtr2g096920.1				√	√			√									NNNNNNNNNNNNNNNNNNNNNNNNNNNNNNNNNNNNNNNNNNNNNNNNNNNNNNNNNNNNNNNNNNNNNNNNNNNNNNNNNNNNNNNNNNNNNNNNNNNNNNNNNNNNNNNNNNNNNNNNNNNNNNNNNNNNNNNNNNNNNNNNNNNNNNNNNNNNNNNNNNNNNNNNNNNNNNNNNNNNNNNNNNNNNNNNNNNNNNNNNNNNNNNNNNNNNNNNNNNNNNNNNNNNNNNNNNNNNNNNNNNNNNNNNNNNNNNNNNNNNNNNNNNNNNNNNNNNNNNNNNNNNNNNNNNNNNNNNNNNNNNNNNNNNNNNNNNNNNNNNNNNNNNNNNNNNNNNNNNNNNNNNNNNNNNNNNNNNNNNNNNNNNNNNNNNNNNNNNNNNNNNNNNNNNNNNNNNNNN…
MsMYB045	MSAD_237419.t1	Medtr8g042410.1	At5g06100	At1g73100	PubMedID:27117388	MSAD_242966.t1	Medtr3g011440.1								√			√	√	√				TGGAAAAAAAATTGAGGGTCTTAAAAGATGCAAAGTCTAAATTAAGACCTCATTCTTAAATGGGCCCACATCACTTTTTTATTAAAATAATAATTAAAAAATGTATTAAAATAGATAGTGTATTAAATATATAATATTGGAGGGACCCAATTAGACCTTTTGGTTAGAGGGTCTCCATTGGAGTGGTTGAGTACCTATTAGGTACTATTATTAAAAAAATATTAAAAACTGATGTGTCAATGTGGGATCCATTTAAGACCTCAGAGATAAGAGTCTCCATTGCGGATGCTCTAAGAAGTTTTATGTTATTAGTCAATCACTATGTCCTCGTGAGTTTAGCTCAGATTGTATGGACAATGCATAATAACATGCAAGGTTCGAGGTTCAAACCCTGACCAC…
MsMYB045	MSAD_237419.t1	Medtr8g042410.1	At5g06100	At5g13490	PubMedID:27117388	MSAD_291039.t1	Medtr3g028590.2						√	√	√				√	√		√	√	TGTAGAAGAGTTATGTGCCAAAATTGGTCTTGATCCACCTCCTTTTGTTTTTGGCTACAACGCACTTCCAATCTCTGTTGATGGTGCTTGATTCCATACGAGTTTGATGTTCCAAAGGGGGGAATTAATTATGATATTCTGATGGTTTTTTTAGGTCAAATGATGTTTCTTTTTAATTATTATGTTATGCTAGGGCTATTACCTTTTTAATTCTGTTTATGTTATGGCTATGGCCTTCTCGTTGTTTATGTCTTTAAATTAGGATCTATGTTTAAGTATTGAGAAATGATATTTGTACAACCACTTTCTCACAACTTTTTGACAATTTTCTCTCTCATACTCACATTATCCTCTTATTCTCTCTCTTCCTTTTTCTCTCTCCATTGTTTTTGACCAATG…
MsMYB045	MSAD_237419.t1	Medtr8g042410.1	At5g06100	At1g21750	PubMedID:27117388	MSAD_214817.t1	Medtr3g088220.1		√					√				√				√		AAAAAACAAATTGGTTAAATGTATCATTTATTTCGAGGCTGAAAATACTTACGTATTCAATTTTTTCTTCTTTAGTTTTTCATACATTTGTCCTTTATTTTGTTAAAACAACACACTCTTTAATTTGTAAAAAGAAAACTGTGCACTAATCAAATTGTTTTAGCTTACTCTTCTAATTTATTAAAGTAATAACGTGAAAAAACTTCATGTATATTTCGTTAGTACTAGTAATTATGGAGTTATGGAAATGACTAATCTAAAATTTTAGTCAAGGGACATCTGAAATAATTTTGGCTGAAAATACAAATACAATAACTCAAAATATAATTATCTACCTAAATATTTTTTTTTGTCATCACATAGTCTACGCACCAATTAACAGAAAAAATATCAGTTGAT…
MsMYB045	MSAD_237419.t1	Medtr8g042410.1	At5g06100	At2g40660	PubMedID:27117388	MSAD_280704.t1	Medtr3g093870.1	√	√		√		√	√	√	√		√	√			√		AACTAATTAAATCTAACGTGAATTCAACTAATTAAAATTGAGTAATGAATAAATAAATTTGAAAAGTGAATAAATAAGATAATTATTGTTCCATTCAAAACAAAATATATTATGCATATTCAACCATATATGTTGTCACATTACATTGTATTACATTACATTCGAGAATGTACCTTCCAACTGCAACAATTATCTTACCCTTGAAGGAGGCAAATTCAAACTTGCTAAACAACAAGACTCCAACATCCGATCATCATCTTGAATGATGGTATTCAAGTGTCAAAAGAATGAGGTGCATTCCTTGACACTTTAATACCATTTTTCAAGATGCTTATCGAATGTTGGAGTCCTTTCGATTAACAAGTTTGAATTGCCCCATCCAGAGTAAGACAATTGTTG…
MsMYB045	MSAD_237419.t1	Medtr8g042410.1	At5g06100	At3g20210	PubMedID:27117388	MSAD_230029.t1	Medtr3g104120.1			√				√				√				√		CATCCTCTAATCTTTAATACACATCTAAAGGTACTCAAAAGCATCTAAGGTTCAACTCAAAAGTCCAAAACACGAAAATCAACATGCTCTCTGGTCATGCTCGCTATGGTGAGTAAGGTTGCTCGCTGTGGCGAGCTACGACTTGTAACTCGCGAGGCGAGGGATATTGGCTCGCGTGGCGAGCGATGAACTTCATCCCTCGCGAGGCGAGGATCATCGTTCGCCAGGGCGAGCGATGAATGTTGGCTCGGACAGAATGCAGTTTTTACGAAAAATACATGATCTCACATGATTCTAAGCCTAATTTCAATTCCAGAATTCATTCTAAACATAATCTAAGGTCAAGGGACGTTTTCTACAACAATCTAACAGCTTATTATCTTCGGATCATCAAATTCT…
MsMYB045	MSAD_237419.t1	Medtr8g042410.1	At5g06100	At4g32900	PubMedID:27117388	MSAD_281157.t1	Medtr3g109700.4		√	√		√		√	√	√	√	√	√			√		ATTTTTAATCTCTCTATTAGAAGTTCTTGTCATCGTGAGTTTAGCTCAGTTGGTTGGGGCAATGCATAAAATATGTAATGTTTGGGGTTCAAATTCCAACCACCACAAAAAAAAAAGAAAATTGAGTATTATCCTCGTGACACCCCACTTCTCCGTATTATAATGTGTGAGCTCTAACGGTTAGTTTACTTGACAAAAAAAAAAAAAAATTCTTGAGTATTCTATGTATTGGAAAATTGCATTTGACCTCCTTGAAATAAATTTCGTCTTTGAAATTTTGTGGGTCTAACTAACATCTTTAAGTCCCTTTTGTACTACTTTCATAAATTTATAATTCCAAACTCGAAAACAAAACTACTATTGGGTTACCACCTAAGAAACTAAAAGATATGCACAACA…
MsMYB045	MSAD_237419.t1	Medtr8g042410.1	At5g06100	At5g66260	PubMedID:27117388	MSAD_211477.t1	Medtr3g117610.1	√						√	√			√	√					AAACATAACATTAGATCATGAAGAATAGAATTAAGAATTAAGGGCTTGTTATTCAATAGTATAACATAACTTATATACCGGTGTCAATCAAAATCCATTGTACCTTGTTATTCATCTAGATTATATTTTCGAATAAAATAAAATTCTAGAAATAAATTTTCATAATCAAAATAACTATATAATATTATATTTTCGATTTTTTTATAATTTTAATTTAATTCAGAATTGTTTTATATTTTTTGAAAATTTTGATATATATAAATTTTTTCCAGAATTTTTTATTTTTTTTAACTTTTTCCAGATTTTTTTTATTTTCGTGATTTTTTTCTTAAATTTTCTAGATTTTTTACCTTTTTCAGATTTTTTTTTTATTAAATTTTCTATATTTTTTCATTATTT…
MsMYB045	MSAD_237419.t1	Medtr8g042410.1	At5g06100	At1g07290	PubMedID:27117388	MSAD_245129.t1	Medtr3g463360.1							√									√	GAGAATGAAATATGTGGTCCCAAATATATGCAGATGTTGGAATTCGAACCTCAGACACCACGCTTATTCACCAAAAAAATATTAATTTTTATCAATCGTGTGNNNNNNNNNNNNNNNNNNNNNNNNNNNNNNNNNNNNNNNNNNNNNNNNNNNNNNNNNNNNNNNNNNNNNNNNNNNNNNNNNNNNNNNNNNNNNNNNNNNNNNNNNNNNNNNNNNNNNNNNNNNNNNNNNNNNNNNNNNNNNNNNNNNNNNNNNNNNNNNNNNNNNNNNNNNNNNNNNNNNNNNNNNNNNNNNNNNNNNNNNNNNNNNNNNNNNNNNNNNNNNNNNNNNNNNNNNNNNNNNNNNNNNNNNNNNNNNNNNNNNNNNNNNNNNNNNNNNNNNNNNNNNNNNNNNNNNNNN…
MsMYB045	MSAD_237419.t1	Medtr8g042410.1	At5g06100	At4g27800	PubMedID:27117388	MSAD_238928.t1	Medtr3g491830.1			√	√			√	√						√	√		AATTAAACAATATTGTGTTAAAATACAAATCGATCTTTAATTTTCTTCTTGAATAAACTAAATTAACCCACCCAAATTGACAGCGAAAAGAATCAAATCTAAAACGTTAAAGAGGAACACACTCCTAAATCCCAAACCAATATCAACAAATCAACCTAAATGGGTTCGATCTTCGATAATGGTAAGTCGTAACTGCTCATCATGTACATGGAATGGTGGTGGTGCCATGCCATGTATGTTTCTGAAACAAAAATGGGTCACTCATACCACGTCGGAATATTGATTTCAATTTATTATTTATTTATTCATTTATTTATTAAATAAAAAGTTCGCATACATTGGTAACTATATCATTGAAAAATTAATTTATCATTTCTTCTATAATGGTTTGAAACTCGA…
MsMYB045	MSAD_237419.t1	Medtr8g042410.1	At5g06100	At1g73050	PubMedID:27117388	MSAD_328658.t1	Medtr4g005860.1	√		√					√			√						TCAAATTTTGCATTGAAAATGGTAAAAAAAAAAAAAGTGCACATTTAACTTTTAAAAGTCAATAAATTGTTTTTTTTATTGAAAAAATTCTATTTTTTACTTTCTTAACTAGTGTCTCGGGGAGTGTCTCGGAGACACTAGTTAACATGACCCCTAATACTCCCTCCGGTCCTTTATACAAGACACAAAAGATATAAAACATCAGGACCAAAGAAATACATTGAAAATAGTTATCTTCATTTAATACACCTCTACGTTTTAAAAAAATCATGAATACCCCTAAATTAATTACTCTTTATTGCACCAATTTACTTACTTTTAATATTTTCTCTCATAATAAATAAGGACACAAATGAAATTTAACTTCAAACATACTTAAAATTTGGTCAATATTTCTTA…
MsMYB045	MSAD_237419.t1	Medtr8g042410.1	At5g06100	At1g80630	PubMedID:27117388	MSAD_289265.t1	Medtr4g009030.1			√	√	√		√	√		√	√			√		√	ATCAACAACCAATCCTTGTTTCCAAGTGTTGCATTGATTGATGATTCATAACAGTGACACTCATTTGTTGCGTATTCCCACCGTAAGCTTTTGTTTCTTTGTTTGTTTTATTGCATATAAATGGAGATTGGATGGGGTTCGTGACATTAGTCCTTCATCTACACAATTTTTATTTTTTATTTAAATTATTTTCTTTCATTTTTAGATGTTTCTACAAAATAGATAAAATTCTAATCTAAGCAAAAGATTCACGAATATATATATTTCATAGAAAAATACAAGGGCTTGTACGTTTCCTATTTTTGAAGAGGCCAAAATTAAGGGCTTGTACATTTCCTTAATAACATAAATTAACGTAAGGTTTTATTAGTTTAGTAATTAAATTTTGTCTTATTTTAT…
MsMYB045	MSAD_237419.t1	Medtr8g042410.1	At5g06100	At1g15810	PubMedID:27117388	MSAD_289272.t1	Medtr4g009100.1			√	√			√	√	√		√						TTCATATTAAGGTTTGACACTTCACATTAATTAACACTAGTAATCATGTGTTTTCTTTCGACAATTATTAGTTAGGAATCCTGCTCTTCCCCCTGCACTTTTCGCTCGCGCCCTGCAGCCATCACCAAAATAACCCTACGCTAGTTAACTAACGCAAGTGTAAAAAATAAGGGACTTAGTTTTTACACATGTGTGACTTAAGTCACGCTGCATGAGTTAACTCACGCATGTGTTAACACGTGCGTGAGTTAACTAACGCTGGTTTTCTTCCTTATTTTGTCTATGAACATGCTGCAACAATTATATAAAACATGACTTGTTTTCTTTCTTATTGTTCCACGTGCTGTGTTCGCGTGCTGCATTCTCATTCATGAAATTTGTTAGATTTTTAAGTGGATT…
MsMYB045	MSAD_237419.t1	Medtr8g042410.1	At5g06100	At1g80280	PubMedID:27117388	MSAD_225778.t1	Medtr4g011440.1			√	√			√	√			√	√	√		√		TTTGCTTCACATTCATGTTTTCCATCGTCTCAAAGCTTTTGCATTAGCAATTTCCTCATAATACCACACATAGACAGTATAATATAATTGTTTATGGTGCTGCTTCTTAAAGTATTTACTCAGCAAGTGGTGAGTACTCTTGGCTTTTGATTCATAATCGCCATTCTTAGCTTGCTAATGTTACTTGGAATTGGTTGTGAAAATTGATAATTTTAGAGAAGGACTTGTACTTTTTGTGATTAACTGCTCATTCAAACAAATTTAGGGTTTTTAGACATATCATCGCAAATTCTTCAAGTCATTTGTGTGGCTGTCTTCACGAATCTCTTTCACATACTCTTAGAAATGACCTTAAAATTTGTAGTTTCAAATAACTATTGGTTCACTCATATTTATAGT…
MsMYB045	MSAD_237419.t1	Medtr8g042410.1	At5g06100	At3g08940	PubMedID:27117388	MSAD_264747.t1	Medtr4g015570.1	√	√	√					√		√	√	√			√		TTTAATGTGCAAATATATGTTGCTTTGGAAGATTAACATTTGTTCGGGTTCTTCACTGGATCATCATCTCCATGATCATTAATTCATTAAAAACATAAAACATAAAAATAAGTTGATAGTAGGAAAAATAGGGATGAGAAACAATTATTTTGTTTCAAATAGTAGAACTTAAGAGAAAAATATAAATTAAATAGATCTAATTTATAGTAAACATGAAAGCTGATGACAATGGCTGGAAATGGTATCTAAAAATGATAGGTGCTGCACAAAGGACAACTCTTTCCATAGTTTCAGATCAAGAGATAAGAGAGGAAAAGAGAGTGTAAGGTGAAGACCTTAACTTGGCTCTTGAGAGAGAGAGGAGTGTAAATACTTTGACTCAATGAAAATTAAAGTTTG…
MsMYB045	MSAD_237419.t1	Medtr8g042410.1	At5g06100	At3g53930	PubMedID:27117388	MSAD_223292.t1	Medtr4g019410.1		√	√	√	√			√			√	√					TGCATTATTCCTTAGTAAGTGAACTAAACTTTCATGGACACTAAACTCACATGGACGGTATGAGTATTAATTTATCCTTCAAAAATTAAACATGTCCACATTATCACGTTATTCTTTTGAATTTTGATGCTTGCTTTATCACTAGGAGAGATCTTTCCTTTTACCAATTGTGATGTGATTAATTAGGAGAGTTAGGACCTACTGTATATGAGGTAAAAATTGGAACTATAGAAAAGTTTGATGGGAACGGGCCAACAAACACAAGAATAGGTTAGTTGTTTAATAGCAGTAACACCCTAATCAAAGGTACCATACCACTATGTTGATGTATTAAATTGCATCATGTGTGGAAATTCGTGTTTATAGGATTGTGTTCTACAATGGAAAAATGGACCCTCT…
MsMYB045	MSAD_237419.t1	Medtr8g042410.1	At5g06100	At4g36110	PubMedID:27117388	MSAD_263601.t1	Medtr4g072190.1	√						√	√				√					AGTTCAACTCTCGTCATCGATGTAAAGACTTTCACAGAAGTACAAGTTTCTCTAGCGTAAAATGTGTCAAATAAAACAACTAGTTTACAACATAGTCCTCACACATTAATAACAAAAAAGCGAACTAACCGATGCCCAAACATACAAGCGAACACGACAAGAGTTACCATTAGCAGCCTTAATCCACCAATACATCATGCAACTGCTGTTCAATCAAATTCTCCTTGTGATTGAAAAAACCATTGTTACGTTCAGTCCACAAGACCCAAACACAAGTGAGCCAAATGAGCTGCATAAAAGAATGTCGCACTAACAAGCCACCTCTCGAATGAGTAATAAAATACAAAACATTCTTTTTCTAATAATCTTAATTTTTTAATCATTTATTTTCTTTCTGCC…
MsMYB045	MSAD_237419.t1	Medtr8g042410.1	At5g06100	At1g26650	PubMedID:27117388	MSAD_281103.t1	Medtr4g082350.1			√					√			√	√			√		ACTATTTAATATACATTGTGACTATAGACTGCAAATAAGATTTGAATAATTTCAATTTAGAAAAGCTTATGTTAAACCATTATTTTATATAAACTATGCATTTATTTAAAAAATAATTAACTTTGAAAGGAAAGGGAAAGGGAGGGTTGGATGATTTTGCATAAATTATTTCATTCGTTCCTTTTTAGTTTATTTTACGCCTTCGTTCTTCAAAATAAGTGAGTCATTTGAAAAGAAAAAAAATTACCAAAATAATTTACTCATTTCAATTTTCAATGCAATATTAATAACTTTATTCCAATTATAAATGTAATTAATACTACCCTCCCTTTCCTTTTAATTCCAAGAAATTTTATAATATGTTTGTATTAACTAGTAATATTGGTACTGGTTAATGAT…
MsMYB045	MSAD_237419.t1	Medtr8g042410.1	At5g06100	At1g69420	PubMedID:27117388	MSAD_281107.t1	Medtr4g082560.2	√		√			√	√	√		√					√	√	GAGAAATAATATAAATTAGAACCTTATTAATAGCTAATAAATCTTTTAGGTTATTTAATTTTTCTTATTGTTTTGTTAGTGATAGTTTTAGATTCTATCAAGCACCATCTCAATTAGGATGGTTCATTGTTTGGTTTAGAATAACTACTTTTACAAAATATGAAATGATTTTTTTGATTGTACAAATTACTACTTTTTTCTGAAGAATTGTACCATATTACTATTATTAACCGATAATTAGTACGGTTGAAAAAAAAATCAAAAATATAACCAAATTAAATATTATAACTATTTTAAACAACTAAAAATTGAATCGTTAAACCAAACCACATTGATAGTTCACAAATCAAACTAGTTCAATTTACAAACTATTTATTTTTCATGCAGTTTGGTTTAACC…
MsMYB045	MSAD_237419.t1	Medtr8g042410.1	At5g06100	At4g34100	PubMedID:27117388	MSAD_276829.t1	Medtr4g085550.1				√		√	√	√			√						ATTTTTATCTTGTTTTGCTTGAACATTGTTGCCTAGATACAATTTCATTTTTTTGTGACTTTTTTTCTCTTTCAAACTCAAACCCAAAGTGTTATAAAATGAAGAATTTTTTTATTTACATTGAATTGGCTTTTGAGTAGAAATAGAAGGTGTGAATGACCAAGATATCAGGTGGACATTTTTTGGCTGAGTTCCTGAAAATCACCATGCACTTCATTGTTATGTGATAGTATATAAGGCGTGAGCTTTTTGACAATAACTTTACGATTGATGGAGACAAATCCACAATTAAATGATTAAAAGAACAAGATTGCGAGCTGCAAGTAACCTTTAAATGAAATGAAGTGGCAAGCGCCAACGACATGTTCTTGCATATTATAATATCTCTACTAATCGAAT…
MsMYB045	MSAD_237419.t1	Medtr8g042410.1	At5g06100	At3g50230	PubMedID:27117388	MSAD_316995.t1	Medtr4g094885.1			√	√	√	√	√				√						ATGTGTAACAATCTTTTTTTTTCTTTTCCCATGAACTAAGTGTTGAAGTGTTTAATAGAAATGTGCAGCAACTAATTGTTTCGAACAATAAGAGAATATATTGAGACTTTTACATATAATCCAAACATGACATTGACATTAATTTGAGAAAATTGAACCATTGAATGTAAGCACATATCGCTGTTGTATCAATGTTGGACACCGGCATACGTCGTATATTGACGCATGTTGAAAACCAAACACGCCTTCAACCGGAAGTGTCGGTGCCAAATAGATTATGCATCAATTCAGTTCTCAAATAGTTTGTTTTAGGAAGCCTCTCAAATGCTTTTGAAGTTTTTATGAGATACGTATGTTGTTAGAAAAATTCGAAGAAAAATCATAATGAGATGTTAATTA…
MsMYB045	MSAD_237419.t1	Medtr8g042410.1	At5g06100	At1g11990	PubMedID:27117388	MSAD_317481.t1	Medtr4g132590.1		√					√				√						AACTTAGAGTCTAACATCTTGATCTACAAATACCATTTAGCATTGTTAGACATGCCTCACAATCAGCCAAAACATTTAAGTCCAAACAAAAGAACAAAAGCCTAATCACATAACAATTTCAGCAACAACCAAAAAAAATGCTAGAAGACTCCCACGAAATCACAACGGCAACACATGCTAGCAGCCCTCAAAGTACAACACATGACTTACTCAATTGTTATAATTAACTACCTCACAACCAAGAAAAATCAAATCAAAAAGAAAAATCAAGTCACCATATATACCTGACGTAGTACTGGAAATAACGACAATTCTCACGATATTAGGAATCAAACGAACGACGACGATTCTCACGAAAATTAAAAAATGCGGCAGTTGGGAACGAAAAAATTGAACAAT…
MsMYB045	MSAD_237419.t1	Medtr8g042410.1	At5g06100	At4g16370	PubMedID:27117388	MSAD_317828.t1	Medtr4g133968.1			√	√	√		√	√		√	√	√				√	GTATCCACATAAATTTCACTCAATAAGAGAATAGACATTAGTGAGTGTTGAAAATAGAATATTAATAGTACCTCTTTATAGGAGTATATTAGTTTTATCATTGGATAAATAAATACCATCATCATTAGATTAAATGGCATAATATGATAAGACTTGTTGATCAATTGATAAAAACTATATTTGTGTATAGGGCAAAACTATTTACCCGTACACACTGGACAAAACTTATTGTTTATGTTTCCCTTTTGTAACTTAATATATTTTTCAGCAATAGACAAATGTTCGTGATTTAGGCTAGTTTTCTGAGTTTGAGCATTGTTAATACTCCTTTAAGGTCCTCATTTAACCAACCGAACTACCTTTGTTGTTTGATACACCAATAATAGAAAGTAAGTCTAG…
MsMYB045	MSAD_237419.t1	Medtr8g042410.1	At5g06100	At3g22760	PubMedID:27117388	MSAD_287633.t1	Medtr5g006530.1			√					√			√				√		CTACAGCATGCTACACATTCTCCTCTTCCCTTTGCCTTCACCTTTATCAGCAGCGACTCTCCCTCATCGTCTCTCATTCTCATCTCTCTCGTCATCACTAAATCGTCGCCGCCAATAACCAACACAAATGAAAACGACAGATGAATCAACACAATGAAAATGACAGATGAATAGAAGATCTGGAATGATTGAAAGAAATAAAGCAGAAGGTGGTGGTGTGATTTTCAACGGCAGTGGAGGTCCAAAACGGAAGATGATCGGACGGCGAGTAAACGGATCTCCGGCCACGTGAGGGAGAAGAGGATGCCGTCGGCGGTGTGAGATCCAGATCGTGGTTAGTGTTGGACGGAGGTGAGAAGGATGGTGGAGAGAGAGAGAGACATGAAGAAGAGGAGGTTG…
MsMYB045	MSAD_237419.t1	Medtr8g042410.1	At5g06100	At5g62240	PubMedID:27117388	MSAD_308820.t1	Medtr5g011390.1					√		√		√								TTCTCTAAAATACATAAAGTATACGAAGCTCTATGGCCTAAAGAAGCAGTAAAACCAGCATGTATGAAGTATGAACAAAAGTATGCACCGTCGAAGAATCAACCTCAAAGATAACATGTTTGAGACAAAGATTGTGGGCAAGACTGATTCCATAGTTCAAAGCTGTCATTTAAGTTGTTAATGTGTTGCCGCTGGAATTAATTTTAGAATGAAAATATTGAATCTTTTTTCCAAATTCATCTCTGATCATACCTCCAATGGAAGTGCTGCCATTAGAAGGAACAAACGAGCCATCAATATTAATGTTAAAATGTTTTGGTGTTGACTTTGGGTTTATATGTGTTTTTTTTTAGGGAAGAGGTGTGTTTCTTTAATGGTATTGGTATTGGTATTTGAATT…
MsMYB045	MSAD_237419.t1	Medtr8g042410.1	At5g06100	At1g77660	PubMedID:27117388	MSAD_218728.t1	Medtr5g058920.1		√		√		√	√							√			TGGACATTGTATTATTATGGTACCGAGGAGGAGGAACTGAGATTCCCACATGAATTTTTTTATATATGTGTTGTCTTGATGCAGTTGTTACGTTAATTAATTGTTTTTATTGATGAATTTTCATTATTGTTTCATGTATTAAATTAACTTATAATCTAATCTAAATACGTAAAGAACATGAAAGAAATTAAGATGCTGCTTTTGTTATCTAGTTTATTGTTTTAAGTTGGTAGCATGATGTCACAGTGGTCTTCAGCAGATCGTAGTTTATTGTAAATCAAGGTTGAGTTCCTGTCTAATGTAACATATTTTGTCCTATTGTCGGCCTATCAAAATAGCGGGAATATTGGTCAGTGTTTTCTTTCTCTATTAACAGCCGGTGCTTCTTTGGAATATTGT…
MsMYB045	MSAD_237419.t1	Medtr8g042410.1	At5g06100	At4g35280	PubMedID:27117388	MSAD_252920.t1	Medtr5g062300.1	√		√		√		√	√			√	√			√		GTAACATAAAAGAGTTAAAGAAAATTAGTAGCATCCCACATACATGGATGCTTTTATCAGCTCGACCAGTTCTAACAACCTAACCTCTGAAGCTAAGTTAGACCCCCTTATTCAAATGCATGTTGAAAGGTAAAATCACAAAAGGCCGTTTTCATCAAAGATCGTGTCTTTTTTAGCAAAAATCCCAAATTGTTAGTGCACACAAAAGGGTACTCATCTCAATTTCCATAACCAATACCTATGGCAAAATTAGTAGAAAAAATTCTTGTAAGTTTGGTTTAGACAGTGGAAGATGTGTTGATAGAGGAGAGGAGGGAAGAGGTTGAAGAAGAAAAAACAATGGGACGCAAACAAACTAGTATAATTTAATGGTGGAAGAAGTTGATCGATGTTGATCCA…
MsMYB045	MSAD_237419.t1	Medtr8g042410.1	At5g06100	At4g28630	PubMedID:27117388	MSAD_274176.t1	Medtr5g075960.1		√	√	√			√										CAATATTAATTGCATTTCTTAATATGTGTGAAATGGTCAAAACGTCATACAATTTAGGACGGAGGGAATATCAAATGTTCCTGTCGTGTTTTTAGCATGCGAACTATACTCTCTTTGGTCTCAAGTATTACCGACATTTCACATTTTAGGTTCATTAAACAACCAATATTGTATACTTCCGAGGTGTTGTTATTAAGAAATGATTTAATTTGTGTAATTTATTATGAAATTAATTATTCTCTCCGGTCCTATTTACAAAAAACAATTTACTTTTTAGATACATTAAATAATTTATGTATTTGGTTTAGGTTCTTGACTAGATACATACATTATTCAATGTATCTAAAAAGTCAACTTTCTCTTGTAAATAGGATCTGATGGAATACTAAAAATTGCTAT…
MsMYB045	MSAD_237419.t1	Medtr8g042410.1	At5g06100	At5g05980	PubMedID:27117388	MSAD_301521.t1	Medtr5g081250.1				√			√	√			√	√				√	TAAACTGATTGATTTACAGAAAATTGCCAAGGACCAAATTGATTGATTTTCAGAAAATTGCAAAATTCCCACGACTCTTTCTCCTCTTTCTCAAGAACGACTCTTTCTGCCCTAAATATATAAATTTGGAACCCTAATGTTACAATTTGTCACCTAGAGTTCAAAATCCTCAAAATTTCTTCCATGAATTGATGCCAAAGTTCTTCCCCAATTCAAAAAACTTAAAACCCTAATTATTTTTATTCAATTCGAAATTCAAAAATCAGTGGTCATTGTTGAAGATTTGGTGTTCAGAAATGATGGGTGGTGGGCGTATGGGCAAAAACAACTACAACAGTCGGTCTTCATCTTCAAGCTCTATGTATAATAATGATGTGAGAGAGCTTCAATGTTGGTGTC…
MsMYB045	MSAD_237419.t1	Medtr8g042410.1	At5g06100	At1g05000	PubMedID:27117388	MSAD_254139.t1	Medtr5g085300.1							√	√	√	√	√	√					TAGGAAAAGCTTAAAAAACAACACAACAACATTAAGAGTTAAAATTTCTAGGATTTGTTTACCGACTTCTTTGCATACAACCTTCGAACTTGTTTCAGATTGGGCTAAGGCCTAATCTGGGTTAGAATTCAGGTCCAACTGGAAATTGGTGCTCGGCGGATCATATTATAGACACGCCCTAAATTGCACAGGATCATGGTTCGGACAATCAACGTGGACTGTCTAATTTTGATCCAATGTTATGACTACGTGCAGATCATTACATATGTCCCTTGAAAACACATGTATGTCACATTTTACCATAAAGTTACCTAACTCTCTTGATCTCTCATTGACTTGAGTGTCGGAACACATGAAGGTACATCATCCCCCTCTAATGGAGAAAGACTCGTGACAAAT…
MsMYB045	MSAD_237419.t1	Medtr8g042410.1	At5g06100	At2g26770	PubMedID:27117388	MSAD_247852.t1	Medtr5g088860.2	√							√				√					ATTCTCTCATTCTAATTGAATCATTAACTCAATTGTGGTTGATCAATATCACATAACATAACACTAACACCACAACGTCACCAAGTGTTCTTGACCTAGTAAAATTGCAACACCACGATCATCATTAATCCATTTTGAATCAAATACGTTATTTCATCAATCAAGGCTTAAAGAAACAACTCACACCGGCATATTTTATGATGATTTGTTGCGAGAAAAATTCCAATTGATATTATATACTTTCTTGCTATACCAAATGAAATATTTATAATATCAAGTGGGTACATCTTACTTTTATTAATTTATTTTGTTGACAAAATTACATGTATTAGTTTTCATTACACACACATGCCACTTAGCTCTTACAATAAGTTTAGCAAGCCAAATTCAACGATTATC…
MsMYB045	MSAD_237419.t1	Medtr8g042410.1	At5g06100	At5g47640	PubMedID:27117388	MSAD_243495.t1	Medtr5g095740.1	√	√	√		√		√			√		√			√		CTTATTCCTTAACTAAAAAAATCAATCATATTGATACGAAAAACAGACGGTTGCCCTGGTTGGAGAAAGTGGAAGTGGAAAATCAACAGTGATGTCCTTATTACAAAGATTTTATGACCCTAACTTAGGACACATAACTCTTGATGGAAAAGAAATTCAAAGGCTTCAACTGAAATGGCTGAGACAACAAATGGGGCTAGTAAGCCAAGAGCCTGTTCTTTTCAATGACACAGTCCGAGCCAATATTGCATACGGAAAAGGAGGAGATGCAACAGAAGCAGAAATTGTAGCCGCGGCAGAACTAGCAAATGCTCACCAGTTCATTAGTAGTTTGCAGAAGGTAAATTCCTTTCAGTTGAATCTTTAAAATTGAAACATACATACATACATAGGTCCAAA…
MsMYB045	MSAD_237419.t1	Medtr8g042410.1	At5g06100	At5g08080	PubMedID:27117388	MSAD_326083.t1	Medtr6g028140.1		√	√			√	√		√		√	√					TAAGTGTAGTTTAATTGTTAGTTACCAAGAACATTATTTGAGACCAAATTTAGAACCTCGAATCCTTTACTTCTAGACACTTAAAGTGTGAATTCAGTCTCTAATCTACTTGACCAAAATAAAACTAAAATTTTAAAGTAAGAGTATAAATTCTCTTGTATCTTATTATTTTTTGATGGTGTAAATCTTAAAATTGACCACTTCAAATTTGAAATCATCAACATGGACATTTAATGACTATAGTCATAACATCTTGAGATGGAAGAAAAAGAAAAGAAAATATAACTCTTGAGATGAAATAAAAAAATATAAGTTATTTTGTATTCCCTTTATTTCAAATTATATGACATTTTGAACATTTCACACAAATTAAGAAGTGTAATTAATGTCAATGACAGG…
MsMYB045	MSAD_237419.t1	Medtr8g042410.1	At5g06100	At5g56590	PubMedID:27117388	MSAD_309456.t1	Medtr6g088885.1				√	√	√		√				√					TTAGCACTCTCCATGTGTGATATTGTTGATATATATGGTTTCACTGTTGATCCGGGATACACTGAATGGTGGGTTTACCTATTTGAATTTTGATTTATTTCACATATTGATTGCTGTACATGTTTTATCTTCCTTATTATCACTTTTGTTTCCTTATAGGACAAGATACTTCTCTGCTCCTAGGAAAGGTCACAATCCACTTCAAGGAAGAGCATACTACCAACTTCTAGAATGTCTTGGGGTATTTGCATTATATAATTCCACATAGAATAACCCTTGTATTCTTTTTATATGTTTTTGACATTTGGTTTAATTGTAGGTAATCAGGATTCACTCCCCAATGAGATCCAAGAGGAGGCAAGACTGGTCAGATGTGCCAAGTAGAGAAATGATAAGCCA…
MsMYB045	MSAD_237419.t1	Medtr8g042410.1	At5g06100	At5g13100	PubMedID:27117388	MSAD_329917.t1	Medtr7g022390.1			√	√			√					√			√		GGAATCTTCAATCTCATCATCAACACCGTCGTTCATCATCATCACCGTACCGGAATGTCAAAACCATTTTGCTGTGGAAATGGTTTTTGTGAGTTGTACTCCAAACCTATTTTGCTATGGAAATGGTTTCCAGAATCTTCAATCTCATCATCAACACCGTCGTTCATCATCATCATCACCGTACCGGAATGCCAAAACCATTTTGCTGTGGAAAACCATTAGATGTACTTAATGGTTTCCAACAGATGTACTCCAAAACCATTAGATGTGCTTAATGGTTTCCAGTAGTTTCAGATCTGAAATCGTGAGCCTCATGAACACTAAACCACAGAAAATCACATAAACATTATCTACCACTCTCGAATTCATCAATAAATCCAGAAATAAGTTCAAATCCGT…
MsMYB045	MSAD_237419.t1	Medtr8g042410.1	At5g06100	At3g26950	PubMedID:27117388	MSAD_257836.t1	Medtr7g026520.1	√	√	√	√	√		√	√	√		√						CAATCACTGTCCTCCGTATCTGCTCGGAACCCAGTGCATGCCTATCGATTGAGCTTGGACTTTTAGCTTAAAAATGCTCTTGATTGTGATATCATAAGTAATGATGTTGATCAATATAATGCTCTATGAGAAGGAGGGGTCTAAAGGACTTGGCTATTTGAATGTACTTAAATGTCATGTTATCTACGATAATCTGTTAAATACAATAATTTGTTTTTATTGGTTCAATAACCAACACATACTGTGCCAGTTACATTACAATCACTTGATTGAAATTTTTTTTCTTCAACTTTGATGACCTAGGTTCGATACTTTGACACGCCAGATACTTTGACACGCCAGAATGACCGAGACATACTCAAATAAATGGATTTGGATCCCACATCTTTTTTCTATCAT…
MsMYB045	MSAD_237419.t1	Medtr8g042410.1	At5g06100	At3g46210	PubMedID:27117388	MSAD_283111.t1	Medtr7g076910.1		√				√	√	√	√	√							AAAGCTCACAAAACTGATTTAGTACCTACAATCCTAAATTAAATAAATGTGCTATAAACCTCTTCAACCATGTCAAAACAAGATGAAAACTCATTTTAATCCCCTTCAAGCTTTAAAGTTGGAAAAGGCGAAGTATTTATTTATTTTTTTTTAGGGAAGAAAAGGCGAAGTAATGACTGGAGTGGAAATAGTGATGCAGAGTAAATAGTGTGAAAGTAATCTACACATCTTCATAAAAAATGATTTTTCATAAATGTGAATATTAAAGCTTGAATCTCTTGGCATATTTAAAATGTGCATGCGTTAGGATAATGACGAAGGGAGATAGAGGCGGTTGTGAAAGGGGTGTTCACTGTTCACCTATATGAAGCAAAGGGCCAACTTTTTATTTTATTTTTT…
MsMYB045	MSAD_237419.t1	Medtr8g042410.1	At5g06100	At5g36700	PubMedID:27117388	MSAD_264945.t1	Medtr7g080530.1							√	√			√				√		ATTGTCAGACACCTTATAATAAAAAAAATTCCTTGTAAAAAAAAAAATTAAGTAAGGACAATGAAGTATTTACACACATATCTAGAAGTAGCTTAAAATGTTATATATGGTTTGATTGGATTTATGTTGGTGTATATAAAATAAAATTAAATGAAACAATACTCCCTTTGTTTTAAAATGAGTGTCGTTTTAGGGGTTTACACACATATTAAGAAATGCAATGATTAAAAGAAAGAGAATGGTTATTTTACCAAATTATCTTTATTAACTATTGGTTAGTTTTAAAGTGTGCAGAGTATTAATTGGAGGGTACAATTGAAAAAAAAAAGTTATTATTGTATTGGAACAAATTTTGAAACAAATTTTTTTAGCTAAAGCGACACTCATTTTGAAACGGAG…
MsMYB045	MSAD_237419.t1	Medtr8g042410.1	At5g06100	At1g67035	PubMedID:27117388	MSAD_299157.t1	Medtr7g082230.1			√	√			√	√	√				√				CCGCATTAAAGAGCACTGACAGTCACATTCTGATTAAGTACGATCACCACCTACAATACTCATCTTTTGCAGCCTAAGGAAGTTTCCACACTATGCTGCAAATGGAAATTGGACAAGTTCTAAGTTCTGTGTGTTTTTCGCCACAAGAGAATAATAAGTTTGTGCTCATATGTTGGCTTAATGTAAATATTCTACTTTTTTCATTGCTATTGTTGAGTGTAACATCATAGACTGCTTTCAGGATTGTCGATTGACCCCACAAACCAACACAAGTTTTTTCAGCGTGTTTTGTCCTCACTCACATGTTTTTCCAGAAAACTTCCCTAAAGGTCACCCATCCCAACCATGCAGTCCCATACCTCTAGGCTTCAGGATCCCTCTCATTCTGATGTGATTCGG…
MsMYB045	MSAD_237419.t1	Medtr8g042410.1	At5g06100	At5g04190	PubMedID:27117388	MSAD_301984.t1	Medtr7g088200.1	√	√	√	√	√		√	√			√		√				ATGATGGAGACGAAAATGTCTCTAAAAATTATCTTAAGAAAGACTAATTTGACAGATATTTAACATTTTTCAAAAAATTTAGATACCTTTCACTTTCGATGACTAGACTAGTATGTGTTGTTTAGAAGTATCAGATTGAGGCTCTACGAGTACTATATTATTCATATTAGGCATTACAGTACTAAGACCAAATTTTGGTGGATGCAACAATACACCATTTGGGATTTGGTGGCTGGACTCTGCCATTATTTAGTTTTGTAGTTGCTTGCCAATTTGACCTTTTTTCCTTTATGTTTAACAGTTGTTGTTATTTTCAACAAACAGATTGGAACTTGGACATTTTGGAATTGATGTTGTGAATGTTGTCCCTGGAGCTGTGAAGTCAAATATTGGAAATTC…
MsMYB045	MSAD_237419.t1	Medtr8g042410.1	At5g06100	At3g09980	PubMedID:27117388	MSAD_262312.t1	Medtr7g104020.1							√				√	√			√		CAACATGGGGAATGAACCAGGATTGATGAAGTTTCCAACTAATAGTGCAAAGTGCAAACATGCATCTTAAACTACTTCATGCTTCTGTTCCTTCATTGGTCTCACTAATTTTTCGACAAAGTTCGAGGCTGTATTTGTAATCACACTTTCCATTCTATTTTTTCTAATAAAAAGAAAGCGCTTTAACAGTTTTACTACCACCCCGGCAGCAAGACATCAAACACGAGAGTCCAGCAAAGTTCCTAAAAGGGAATACTCTAATTTATCTAAATCTTAGACTAACCAAACACACATGAGATAACCTTTCTTCCAATCAAACCCTATAAAAAAGTATGCTAGCTAACAACAACATAAATGCTATACAAACAATGAAAACGCAGAAACGGAGATGAAAAAGTG…
MsMYB045	MSAD_237419.t1	Medtr8g042410.1	At5g06100	At1g02730	PubMedID:27117388	MSAD_285231.t1	Medtr7g109200.1	√											√	√			√	CCGAACTAATCATTATAAATTTAGATCTTAAAATATGAATTAGAATCTGAACTGTTCCATCTTTATTGAACAATCACACCAATATCTAAACTATTCAATCTATGAATTAGAATCTGATCTGTTCGATTTTTATTGAACAATCACACCAATATCTATACTATGTGAATGTAAGAAATTTCAAAGCACAACATAGCTGAATCTGAAAATTTGTGGGGGGTGTTGATTTTCTTGTAAAAGAAGTTACCAATGATGATGACCACTTGTGAGTGTGAAAGATTTTGGATCAAATTCACACGAGAAAGGAATAAACCATACCTTAAATTAATATTTTTATTAGATTATAATCTTCAAGATTTGCTACCGTTACCATTGAAAAGTTAAGTTAATATTTTTATTCGT…
MsMYB045	MSAD_237419.t1	Medtr8g042410.1	At5g06100	At3g04580	PubMedID:27117388	MSAD_244491.t1	Medtr7g116330.1			√		√		√		√								CATCTTCATTTAGTGAAGAATGTTGGCGGAGGCAAGGTTTATGGGACCAAATTCATCCTCTTATTTATACAGCCGATTCTTTAATTTAAAGATATTTTCTTTGATTTCTTAAAAAGGAATTAACCTGAATGGGTGCAAGCTTCTACTTAGTCTTTATGAGCTTATGTGCTATTTTAAATGGGTGCAAGCTTCTACTTAGTTTACTTATAAACTATGGTGTTAGCCTCGATAGGCGGTGAGCACATAGTGTAACTCATTCAAAAGTCTAAAGTAACAATCAATAAAAGTGTTTTCTTAAATGATACTAATTTTATCATTGAAATCAATTCAATTAATCGTTTCATTAAAAATGCGCATAATTCAAATACAAGATTTAATTTGAGACAAATGAAGTAACAT…
MsMYB045	MSAD_237419.t1	Medtr8g042410.1	At5g06100	At3g49380	PubMedID:27117388	MSAD_298801.t1	Medtr8g024540.1	√	√	√	√		√		√							√		CAATTAAAGATTTTCCACTATTTTGTCGTTTGAGTGGAGCCAATCAGTTGCTTGCTGTGGTCCAACCAAATATTCAGACCTTGGTAAGATGTGTAAGGCCTTTATTTCGTTATCTTAGAAATTGTAAACGAATGACTCAAAATTGCTGATATGATAGAGCAATCTCCAACTCCAAGTATCACTAATGATGACAGTTCTGTTGATTATTGAGTTTCAGTTTAAGATAAAATAAAATTTAAATTGATCTACTCATTTCTTTTGTTCAAGTCACAATGAGCTTAATTCACTCTCTTTACACAAAATTACGAGTTCAAGTTTTGTGAGAGAAAAGTTTAATGAATTTCATTAATAATGCGATGATGAACGTAAGAGATAGATGTTCTAGCTAGAGAATGGGCA…
MsMYB045	MSAD_237419.t1	Medtr8g042410.1	At5g06100	At3g61880	PubMedID:27117388	MSAD_298752.t1	Medtr8g027040.1				√	√		√						√				CCCTTTTTATAATACCCCTTTGCTATTTTCAACTACATTAATTATTTCTTTACATACATGTCCATATTTGTTATACATCTTTTTCTTCAATCAGCAATAAATAACAGGTTGAAAACATAAACCAACTCTCTTTTTTAAAGGATAAAATTGTAAAAACAATAGTAATTACATACATATTTAATACAAATATCCACTATCTTAATTCCCGTTATTTTTCAAAAAGGTCCTATAATTAGGGATAAAGTTAGTAGTTTTTTTTTAAAATAGAATTAACAAAAAAAAATTAAAGAAAGTTTCAAATGAAAAATCCATTTGAATATCTTATCTTAAAATGTCATTCTAAGTATTTCATCATTTTGTTATAATTTTTTTTGGATATTAAATTTTGAAAAAATCTCT…
MsMYB045	MSAD_237419.t1	Medtr8g042410.1	At5g06100	At2g45420	PubMedID:27117388	MSAD_306752.t1	Medtr8g036085.1		√	√				√	√									TTTTCAAACACAAGTTACTTGAAAAAAAAAAAATCAAACTTATTAATCGTCACTTCACTTTGATTTACGGGATCTTCTATGGATACTATACTTGTGTTGAGATTGCCACAACTCAAACCGTCATAACTTATCAATTTTTGAGTCAAAAACTTAATTATCAATTTTGTTGCAGCCAGCCATTTCAATTTTTTAATTACTTGCTTGATATGTTGTTTTACTGACACTTCCAGGCCACTCAAAAGACCAATCTTCAATTCCTTCTTTCTTTCTTTGTAAAGACCAACCTACCTTTCTTTTCTTTTACTCAATCAATCTTCCATTCTATACATACATATATAGACTTTTGTTTATATAATATATTTAAAGTGAGAGAATGTTCAAAGCAGAAAAAAAAACTTT…
MsMYB045	MSAD_237419.t1	Medtr8g042410.1	At5g06100	At4g35130	PubMedID:27117388	MSAD_247527.t1	Medtr8g086560.1	√		√	√	√		√	√	√	√	√						TACATGAACTGGTAAAAGAGTGAAGAAATCGCCCTTCTCGCCGTCTTGTAGTCTCAAAATCGCACTTTGCTATCTCAAAATCGTAACCCTTGTTTTCAGAATAGTCTTCAGCTTAAATAGGCAACATTTTCTGCGTCCAAAATCGCGCCACGCCTCATAAAATCGCGCCACGCCACCAGAAATCGTACCACAATTTCCGTGGTAGAACCAAACCTTCATTCTGGTCACAAAATTGCGCCACGCCACTCAAAATCACGCCACGGTTGCCAATTTCCAGCACTTCCAGAATTTCTGCTTTTTACACCCCCAGGCTGTCTAAAATTGCTACAGACTCAATAAAAACATCAAAACAACTGTTTCTTCAAAATCTTGTATTTTTCATGCTTTCCTTGTTGTTTA…
MsMYB045	MSAD_237419.t1	Medtr8g042410.1	At5g06100	At3g61460	PubMedID:27117388	MSAD_298340.t1	Medtr8g098770.1		√	√				√	√				√					AGAATGGTGCATAAAGTGTAACGGTCCATTAATTATTTAGGGTCGAAAAACCTAGTCCAAATGGTTGAACTGGTCAAGGAACAAAAAAAAAAAAGAGTTAGTTTTGTTGACCAAGCCATTATCCACACACTCTTGATATAGACACGGTTCCAAAAACTTTTTCATTTAAAATAGTTTTTTTTGAATGAGTTTCTTTTAAATTCACACTCACTGAGATCAAAGAATGGTGCTCTGACTCTTGATAGAGTTGGGCCTCTACCTCCAGATAAATGAAATGGATGATCATGCCAAATATGAATTTTCTCATTGCACAAAAATATAAGCATGTGGTAATTCTACTATCCATAAAAAACAGAGAAATCAAAAACTTATTTTTCTTTACGCGGTGCACCATCACAA…
MsMYB077	MSAD_249374.t1	Medtr5g038910.1	At1g14350	At2g25450	PubMedID:25352272	MSAD_244362.t1	Medtr2g069210.1	√		√		√		√	√			√	√			√		TGGTGGCTGTTAGGACTTGGAGAAACAGTAAAGAGATTGATGCAGTAAAATAGAGAAAATGGATTGAAATACGAGACTGACTATTGTTGAACTTTTGGGGAATTTACAGAAGGATCTAACAATCACAACTACCACAGAGCTAAGCTCCTATGGAGGGATAAATGCTCTCCGTTCAACAGATTACATTCTAATTCTTTTGGATGCCTCCTAGATTCTCTCCTTCCACTATTCATTCACTTGCCTCAGCCTAACAGAATTAGTCACTCGTTAATCCATAATTGTCTCACCTACTGCCAGCTCATGCTTCCTCAAGTGCCTTCGGATACTCCCTTACCCTTCCTTGAGTAAACTTGCCACACTGTGGGTCCATGTGATAGAGTTTGGGCCGTAATCATGAGA…
MsMYB077	MSAD_249374.t1	Medtr5g038910.1	At1g14350	At4g31500	PubMedID:25352272	MSAD_316759.t1	Medtr4g026050.1			√	√	√		√	√			√	√					TACATGATATCATGTATGCAGCCTCTTAATCACTTGATAACAATGTTAAACATGTGGTTCACAATGAAGTTCAACAAGCCAAGGGTGGGAGAACAGAAAAGCCAATTATTGTGACAATTCTGTCACCAATACTCCGTAATTTAGAGTATAAGGGAAATAGAGTATGTATTTTCAATCAATGCCACCCGACCATTGCATAGATATGACCTCAACAAGTTCAATTGATTCCTATACAATAGGTAAATATTACTCCTTATTCCCAGCCTAGTATTTTTGTCACGACTAACCCTAAGGGCAACCAATGGTGAATGGTAATTACAATCATGCTAACCTTTAATCTAGACCAGTACATATGACGAGGAGGCTACCTGAGGTAGTAGGATAAATTGGCGTGCATAT…
MsMYB077	MSAD_249374.t1	Medtr5g038910.1	At1g14350	At1g62540	PubMedID:25352272	MSAD_210786.t1	Medtr5g012130.1			√	√			√	√								√	TAAAAACTATTAAGACGAAAATGATGATTATATAAATTGTTTTAAATTAAAATTGAAAAAATGGATTGGGTTAAAATCACCATGTTTACGATAATTATATTTTTTCTCTCAATTCACGTCGTTGATACTTTAACCAATATTGTTGCCCCATAAACGAGTACTCGCTGAACCAATAACATGATGGACATACTAATTTTCAACCTGACCACATCACTTCTTTTGTGCATCTATCATAGAGATTTGTCGTCTCAATTTGATAAAAAAATTACTTTTTAATTGCTGGAAATTAACTAAAAGCATAGCTGCTCTTGATTTAATCTGTATAATTCTGCAACTAATCCACTGAGAGTATATATTGTCGCATAGCAGCCGCAATTAACACTCTACTTGTCCATCAAG…
MsMYB077	MSAD_249374.t1	Medtr5g038910.1	At1g14350	At5g07700	PubMedID:25352272	MSAD_260968.t1	Medtr7g011170.1	√		√		√		√	√				√					AGATTTTTATTTCTTGGTTGGATATGCACATTGGATTTGAATTGCAAATAATCATGGCTATGCATTCATTATTCATGCACAGTCGGCATATTTGTGATTGTATGATTTAAGATTAGACGGTTCATAGATTTATAAAGTTGATTTTTATTTAAGAAAATCTGAGAAGGAAGAAGGAGAGTTTGCAAGCGCGTGGGATTTGTTTCAGAGTAGAGAGTGCGTATGATTTTTTCTCATTAAAAAATTGCTTTTTCCAAACCATTTAATCACGACCATTGATTTTATTTTTTTCCACATGTCACACATCCATGTCTTGAAATGGGGTAAATTGAGCAAAGATGCACTCAGGCTAGGAGTCGTAAAGTAGCAACGTACAAAGGATAGATGTGGAGCCCCCAATGG…
MsMYB077	MSAD_249374.t1	Medtr5g038910.1	At1g14350	At2g20610	PubMedID:25352272	MSAD_310554.t1	Medtr8g061360.1			√	√		√	√	√			√			√			CTTTGTAATTTTTTTTTTACAGTGGTCTTAGGGCAATAGTTAAATAATCTATAAATAAAAAATTTATGTAAAAAAATATAAGTTTTGATTTTTAATTAAATAATAGTATATCATTTTTTTATATTAAAAAGTTACTTGTTTTAGTTATTTAACCAATGCCTAAAAAATACTGTTTAACATTCTCCTTTTTTAAATATACAACTTATTATTGTTTAAACAAAAGACTAGTGGCGGCTTTGAGTTTGTTATTACTTATTACACACCCTAACACAAACTATTTTTAGATTACCCAAGCACAAACCATTTAGACCAATGTAGTTTTTCTTAATACACCTTACGATACAAACAAAGACCTTGATAATTTTTCTCGATGCCACATGACCATAATATTGTTTGGCA…
MsMYB099	MSAD_260349.t1	Medtr5g014990.1	At3g49690	At2g23770	PubMedID:27117388	MSAD_231631.t1	Medtr1g021845.1	√		√	√	√			√		√	√	√					CAAACACGAGAATAATTAATTGAGTGGTATCAGAGCCGTAATTCAGTTAGGAGGCGTGTTCGATTTGTTCGTGTTAACGGTTGTGCAAATATAGGATGTGAAAAATTCACACTAAACTCTAGTTGCTTCCGGCGCTCCCCCAACTCCTTAAACAAAATGTGACATAATGCATGTTCCTATATTGTGTTATTTAGCGTGTTGATTCATATAAATTAATTAGCTATATATAGCCTATAGAATGTAATGCAAGTAATTAAAACTAAATTAATAATGCATATTAGTAGTTAAGTTGGTTAAAAATAAAGACAGCATAAACAGTAGTAGCAGTGTTTATAAATGTTAAAAAACTTAGGGTAGAATATAGAGGTGTAACTAAGAGGGGGGGTGGCGTGAAAGCTC…
MsMYB099	MSAD_260349.t1	Medtr5g014990.1	At3g49690	At1g77480	PubMedID:27117388	MSAD_311128.t1	Medtr1g029810.1				√		√	√	√			√	√			√		TTGCATATGCTAGTTGTGAGACATAGAGCTAGGTTTACAATTACACATATTATCACGATGTAATGCTATTTTATCAATTAACTAAGCAGGGTATTAGAAGTTAAAGGATAAAATAGTTCTCTCGTTATCTACAAGACCTTGAGATGTACGGTGAGCGATATGTGAAGTTATAACTATAACACTACGAGTATATAACTGATAACGAAAGACATTACAGGATTAACTAATGAAAGACTTTTTACAAATCATTAACATAAAATATTGAAAACTGTTGAAGGATTCAAAATTTAACAAATCTTTTTGGATCGACAATCTATAATAGAGGTGGAGGAAACACAAGAAATGAGGGTTTCAATTGTGTAGACGATTTTAATTTTTTTTCTTTAACAACCATTAACA…
MsMYB099	MSAD_260349.t1	Medtr5g014990.1	At3g49690	At5g63830	PubMedID:27117388	MSAD_322835.t1	Medtr1g032200.1							√	√				√					TTTTTGTGGAATTTTTTTGTGAGATTTTACAATTACTTTGCAATTACAATCTAATGGTTGAATTTAGTCAAAAAGTTAAATTTTCTACATATAGGTTAAACTGATTAAACATACTTCTAGAATACAAAAATAATACTGTTTATGTAGGTTGATCTAGTAGGTAATAATCCATATAAGATCTCTATAACTTAAGTTTGAATTTTGCTGCTGATGGAAAATCCTTCTTTGCTAAGTTAAAATTTGGCAGCTCATATTAGATCTTTTGAAAATTATGTAAAAAATACTTGAAACATTCTCTTTCAATTATCACTACAATAGTCATTCTTTAATTGAATGAAATTCATATATGTATCACCATTTTATATGGAATCGATCTCAAATATATGATTCACATGAATT…
MsMYB099	MSAD_260349.t1	Medtr5g014990.1	At3g49690	At3g24050	PubMedID:27117388	MSAD_219604.t1	Medtr1g046680.1	√				√			√			√	√					ACAAAATGAAAGAGAGAGAGGGGAATGACACTTGCAGCTTTTGCTTTTCAAAGTTTTTCTCTTTTAGAACAATTTTAGGGGAATGACTGTCTGCTTGGTAATTGACCAAAGAGACCCAAGTGTGATTGTACTTACCTCATAATACTCTTAGTGGTTTATGGAATCTATAAAGTACATCCCATGCTACCATCACCAACATTAATTTATACCACAAAATATATCAATTCTTTTAAATTGTTTTCATTTGCTTTTTTATTATAAAAAACATTTTGATTAAGAGAGGCACTCATCATTCAAGACTAAAAACCACTATAAACCTTACCTTAGCTAAATTATGGAACATGATTTGGTGCTTAAACTACGTCCTGATGTAACATATCTCCGCCGTCCGATCTTTAA…
MsMYB099	MSAD_260349.t1	Medtr5g014990.1	At3g49690	At1g04450	PubMedID:27117388	MSAD_267356.t1	Medtr1g069650.1	√						√				√					√	ATAGGGGTTCAAAAGTGCAATTAAGCCTTAAAATTTTATAAAGAAAATAAGGAATTGACACAAAAAACAACACAATAGAGAGAGAGAGAGAAAGTAAAAATATAATATATGATAGAGAAAATTGTAACAAAAGTTTTAAAAAAATGGTTTTTCAAATATCATTTCTCAATTTATTTACATCTCTCTTTCTACCACATCATAGACAAATCACACAAAATGTCCCTATTTATATCACTCATAGTGTATAAAAGATGTATAAGGGTTGTATAGATGTCCGCCCATCTTTTTCTTTAGTCTAATTGGTTTCCAACATGTTTCAATATTTTCTATTATATATCAAATGAGTAATGATATTTGTACACTCATTTGATGATAATTTTTGTGACAACTTTATTTTTC…
MsMYB099	MSAD_260349.t1	Medtr5g014990.1	At3g49690	At1g71060	PubMedID:27117388	MSAD_312601.t1	Medtr1g108270.1			√				√	√									TTCATTAGAGGGATTTTCTTTTAGTTTCAGCATCTCCTGCAAAAATGACTCTTTCCAACCATTTCTTTGATGAACATATTTACTTTAAACTTTTCTAAAGCTTTGATGAGCTCTTAAAAATTTTCATTTTCTTGATGCTCGCCAACTTCTATTCCCACGTCAAGAGTCTTTCCTTCTTTAAAGTCATGTTGTGTATCATCCTCAACTATTGTTTCTGATACTTCAACATTCCCCTTGTTTTCCATATTCCTTCTATTTTTGTTTTTCCTCGAAGGCTTCTTTCCTATTGATAGACGAAATTGGCAAGTGCACCAAATCGTAACAAGTAATAAAACAAAAAATATAAAAGTACAAAAGAGAAATTTTGAACGGTGTATTCATTTTCTTAACTAACTCTTC…
MsMYB099	MSAD_260349.t1	Medtr5g014990.1	At3g49690	At1g68620	PubMedID:27117388	MSAD_228375.t1	Medtr1g111280.1		√		√	√		√				√						TTTAGTCCCTGATTCTGTAGCACACATAGATCCCTGACTCATGATTAAATACAAATAAGTCTCCGACTCAACACTTCTGTTATCACTTTAGTCCCTGACGTTAAATAATTTTGTTAAGCGATGATGTGACATATGAGGTGTCACAAGGACTAAAGTGAAAGTAAAAATGGTCACTTTGACCCCTGAACCAATTAAAAATCAATATCCTCAAATTGAATCTCAAATCATATAATGTATATTAAAGAGAAATATGCCAATTTTAAATTCAATATAAATGGCATATGTAATATACATATGATCACTATACTCATTTTAAAAATAAAATATTATTAGTACCCTTTAAATCAATTTGTGACAAGAGTCACAAACAAATGTCTAACTTTATATATGTCGCAAAAA…
MsMYB099	MSAD_260349.t1	Medtr5g014990.1	At3g49690	At2g35760	PubMedID:27117388	MSAD_250183.t1	Medtr2g026530.1			√		√		√		√			√				√	TATCTTCTACCCCAAAGTTTGCCACGTAGAATAAAAACAAAATTGTACTACTGGGACAAATATTCCATTTATAGAAATTGACAATGACATGCAAATTTTCCCATGGTGATAAATATAAACGATTGATTTCACTGATAAGACTTGTTTTGATTGGCGTATATAGGATAATTACCAAATTTAACATATGTTAAGAAGAAGACATTTCATTAGGGGAATATAAGCTTGCTTTGCATCGGACATCGTTGTCGAAGTAATATGTAAGTTCTTTAATCTGTATGCTGAAAATCGACTTCGTTTACTTTATCAGTGTCCAATATATATAACTATTACACATTCTTATTCCCTTTCTATCTTAGTTTCTATATCTTTACCACTTTCACCATATAATATAATATTCTT…
MsMYB099	MSAD_260349.t1	Medtr5g014990.1	At3g49690	At4g17220	PubMedID:27117388	MSAD_250167.t1	Medtr2g026590.1		√	√	√			√					√			√		CTTGTGTTTATCCATCATACATAGTAATATCTATCTTACGTTAGAGATAATCATAGTAAAAGGAAAAACACTCTTCTATGCACATTTTAAATAAATACTTTACATTGAAAATTGTCATAATCAAACCAAGTTGTTTGGGCTCTAGTAGCAAGAAGTTTCGTTAAAGGATGTATTCGAAGAATATCAAGTTCGATTTTCAGAGGAACAACACTTGACCAGTTGCATATCTCTACACATGAACTGGATTAGTCGCTCACTTTTGATGAGTCGAAAACTGGTGCAAAAGTCAAATATATCCGGAGAATACTTAGGTTCGATTCCTTTTTAGAATGAAATAAAATAATGAAAAATAAATGTATTGAAGAATACCGGGTTCTATTCCTTCTTAGAATGAAATGA…
MsMYB099	MSAD_260349.t1	Medtr5g014990.1	At3g49690	At1g74030	PubMedID:27117388	MSAD_226699.t1	Medtr2g056190.1	√		√		√		√	√		√							GGGTATTACCCGGACCCTTCCCCAGACCCATGATAGCGGGGTTTTACTCAGACTTGTACACAACAACACTCCCCTCCACAAACGGACCGACACTTGCTTGTACCGCCGCTTTTTGCGCAAACGGACCGACTGCCTCAGTCGTACCCTTCGTCGAACCGGGCTCTGATACTGCTGTAGGAACACGAGGGGAGCCTGGGGGACCGTCCATATTGAGGCTAGACCAACCGCACAAGCAACTGAGGCACCACACTCTTACCAAAAACCTTAAGGCGATGAGTTTATGGGTCCTCTTACTTATAAGGTGTTCAACCTTTACTCTTTTATCCGAAGTGGGACATATAACTCACACTTGTACACAACAACATAAAGCACCCACTAAATGTGCATCAAAATCTTTCT…
MsMYB099	MSAD_260349.t1	Medtr5g014990.1	At3g49690	At1g78600	PubMedID:27117388	MSAD_276039.t1	Medtr2g073370.1		√		√			√						√				ATTCTTTTAGAAAAAATTACTCGATGTCTTTGGATATTCGGCGTAGATATCAAATAATTAATTGAATTTGTAAAAATTGAAATTAATATATGATTTTTTTAGAATAATTTAGGACCGACTAATACAAAGGTTTTTTAATCTCAACAAAATTCTTATTTAAAATACCTTTTACTAGAAAAAGAACTACTTTTTGTGTCAATTTTTTGGAAGTGTTTGAAGGTTAAGTCAATCCTAAAGATCACTTATTCATCTGTGACCCCAAAGCAACCTCAATCACTTTACTTGTGCTTTCATTTGTGTTTTTCCATTTTTAAACCAAACAAAGGGGAAAAATGGCCATTGATTTTCTCAGCTATTATCCTTTATAAACTTTTTAAAGAACTTATAAACTCAATTAAA…
MsMYB099	MSAD_260349.t1	Medtr5g014990.1	At3g49690	At3g44220	PubMedID:27117388	MSAD_229376.t1	Medtr2g086790.1				√	√		√	√			√		√				AGTTGCCCTAATTAACCCTAATCCCACCTTTTTTGATCAGCAAGATTCAAACCTTAGAGCAAATGACTTCATCTCAACATTATGATCACTAAGCCACTGCCAATTTTCTTGATATGGTTATGCTTCCATTAATTGATATCCAATATCAAATACCCTTTTTAACAAACCAGTAAATCTCTCTTTTGTTACCCACTATCACATTATCCATAATCCACTAACCATCTATTATTTATTATCTTTATCTTTATATGTATAAATGTTAGACAGTGATGCAAGTTGCCCTAATTAACCTTAATCACGCCTTGTTTGATTAGCTTAATTTTTTATTTTTTTTATGTAATCTTTATCTTAATATATATAAATGTTAGATTTTGTAAAAAAAAATATATATAAATGCCA…
MsMYB099	MSAD_260349.t1	Medtr5g014990.1	At3g49690	At1g03940	PubMedID:27117388	MSAD_331574.t1	Medtr2g089765.1	√		√		√			√		√		√					GAGAAGTTGCAGTCGGGATTAAAACTCAAACAAATAGGTGGAGTGGTCGGGATTCAAATTCCGATTGCAGCGTCTAACCTAACATTTTCGATATTTTAGCGGTTGATTTAGAACTTGTAGACAAAGTAAATATAATTTAATCATCTAAAATAACACATTATTTAAGTCTCTCTTCCTTTACCTTTTCTTATTTTTGTGTATGTCTAAATAAAAATTATATGAGATTGTCATCAAGCAATCATGAAAGTGTGTACGTTAGTGTATGCATGCATGAAAGTGCGTGCAATATGGCTATGCTCCATTGCAAGCATAAGTACGTGATCATCATGCACGTTAAGTACAGTTACGTTAGCCAAGAAGTGGTGGCCCTTGGCTTCTATGTAGAGCCAATTACCAAAT…
MsMYB099	MSAD_260349.t1	Medtr5g014990.1	At3g49690	At5g37790	PubMedID:27117388	MSAD_277350.t1	Medtr3g067650.1							√						√				AACTCATGTGACTCCAATATCTTAGAACAACAACTTACAACTTTGACCAACATATGCAACTTAATGATTTAATAACAATACAGTAGAGACATCAACATACAACAACTTTACAACATAGCATCATTAATAATAACAACTTGAATGATATAACAACATTATTTTCTATATCATACCTTTTCCACATAAATATATGTAACTCAAATTAACAACAACTTAATCATTTAATTCAGACTCGCTGAAACACAATATAATTATGAACAACTTTCATTCATGCCCCAAAGACCAACTCACGAACTCATTAGACCCTTTATACAAGTTTGGAAGCAATTGGAGTGAAGAAAATTACATTTTTAAGGTTTCTAGTGTGATAGAATCGTGGCACGTTGGTCTCCCATCGTG…
MsMYB099	MSAD_260349.t1	Medtr5g014990.1	At3g49690	At1g70600	PubMedID:27117388	MSAD_302717.t1	Medtr3g077050.1	√	√		√			√	√				√					TCACATGCTAATTAATTGTCATTGAGGATGTGGGGTTTTGCTTAGTAATGACATTGCTCAGTAGTGGTTCCCTCAATTTAACTTAACTTCATGTATATATTAGCTGCAGTTATTTCCCACTATCAAGACTCTTTATTTATTTATTTGGTGTCTAAATGCAAGAGGTGTTCTATTTGCTTTCTTTTCAATCTCTTCAGCTCTCTATTTTAGCTATTTCTTGATGTAGGTGTAGAAAATTTCGATATTTCTGAAACACATCAAGAACAAAATAGAATAAACTTAATAATAAAACAATTAATTAGTTTTTCAAATTATGCCAAAACCTTTTCATTTTAGAGTAATACTATACTATTGGAGTAATAAGTACTTTAACATGTTAAAATAGTAGTTTGATTAGGA…
MsMYB099	MSAD_260349.t1	Medtr5g014990.1	At3g49690	At3g51980	PubMedID:27117388	MSAD_273569.t1	Medtr3g080080.1	√		√	√	√			√									ACTTATCTTATGCTTCAAGTATCTTCTTGTAATAATAAAAAAAAAATCTTCTATTTCCTCTCTAAAATATATCTCTCTCTCTTACACACACTTTATAAAAAATTCTTCTATTTCCTTTTTAAAATCTACTTAAAAAATGATTGAACCGATTTTAAAAATATCTAAAAACAATCGATTGTTGTCACTAAAAAGTTGAGCGGCAATTAAATATCATTGGTGTAGTTTTTGAACAATTTCATAATTGAAAAGAATAAAAATCATATTGTGGCCGTATCAAACACTTGATCCCTCGTTCTTTGATTTTTCTTGACTCTTTTTTTCTCTCTCTCAACAATAGTGTTTTTCCTAATTTCTCTCTCACAAAGAACACGGTAAAGGAAAAAGAAAGAAAAAGCCTTT…
MsMYB099	MSAD_260349.t1	Medtr5g014990.1	At3g49690	At5g64860	PubMedID:27117388	MSAD_303177.t1	Medtr3g094840.1				√				√			√	√					TTGGATTACTGTTTGATGATGTTGTTGATGGCTGTAATGTATGTTATATTTATTAAATCATACATGTTGTATAAATTCGGAGTCATATGAAAATGTATGCATGGTCAAGTTGTATGTAGATATACACTAGTGGGTCTATAGCATATGCATAAACAGCGGGAGGACTCATGTCCTGGAGCACTAGTTGTTCACAGCGGTGAGGGCTTATGTCCTGATGAATGCTTTAACCATTCAAAAGCGGTGAGAGCTTCGGTCCTGTTTGGTACCACATGCATAATTGCATTTATTAAGGGGTCTTAGTGGTGTCGTCATGTCATGCATGAGTCTTGTTGTTGGTTGCATTTGCCTTATTGAAGATGATGTTGTTGCTTTGTGAAATATATATTTATAATTACAAGA…
MsMYB099	MSAD_260349.t1	Medtr5g014990.1	At3g49690	At4g32800	PubMedID:27117388	MSAD_281147.t1	Medtr3g110205.1				√	√			√			√	√					TTGGTATATTAACTTTGTCGTTCAAAAAAATAAAAAAAGAGTTAAGAATTGAAAATTACCCTTGAAGTATGTTAAATGAATTTCACCAGTGTGAAATGTTGCATTGAATTTTTGTCTTCGTCCTAAATTATAAGTCACTTTGATTGTTCCGTACATATTGAGAAATATGGACAATAAAAAAAGAGAACTACAAGTTCTTTCATATGATTATCCTTCATTAATTATACATTTCATTGATATTGTAAAATGACTTATAGTTTCAAATAATATTTTTTCAATGTTAGTTTATTTTGTTTTGAAACTTTTTAAAAGTTTTCATTGAACCTGGCCATATATTATGAATGAAATATACTATTACAAATGGAAATAAACATGTTATTTGATTTAATAAGTTTTTAT…
MsMYB099	MSAD_260349.t1	Medtr5g014990.1	At3g49690	At1g20780	PubMedID:27117388	MSAD_255990.t1	Medtr3g115670.1			√				√	√									GAGTTACACACTCACTTATGGCTCAAAAGCGGTCTTCGTCTCTCGGACCTTATTTTTGTTGTAGAAATCTAGTGTATCTGGAAAGCACAAAATGTGATGTGTCTTGGTAATAAGCAGGTTAGATATCATCAATTACAACACAATGTTGGGAGCTATCTTAGTTCTCTCTTGATGTCCTTTGGTGACAGTGTTCTTTCTCATCCGCCACAACGATGGACCTCTTGGCACTCTTCCCATATGGAAACTACGATTCTCAATGTTGATGGAAGCAGTTTCGATAGTCCCGGTCGCTCAGGCTTTGGAGGTGTTCTTAGCGATTCGGACGGTGCATGGCTTTGTGGATTCTTAAGATTTATCAGCATTCAAATAATTTGCATGCGGAACTTCTTGCGATCTTGC…
MsMYB099	MSAD_260349.t1	Medtr5g014990.1	At3g49690	At5g58550	PubMedID:27117388	MSAD_229413.t1	Medtr3g465430.1			√		√		√	√	√			√	√				CAAGAATCATCAATTAATCAATGCATGTACAATTTTTCCTTTATCCATTGTTAATTTACTTAAACCTTGGATCTTACACTAATGTCATGAAACCCTAAATCAAAACTAAAAACATATATGCACGAGGAAACATCATTAACAATACTTAATGAAGTTCTAATACTTAAGAAGTATTTGAAACATCATTAACAATATCAATTATATCCTCGCAAATGACATATTGTTATTTGCTGCAAACTTAAGTTAACGCAAGATTCTATTCTCCAAATCTCGCAAGGAAACAAACATGCCCGAACATACCTTTATGGCTTAAACATCATAAGTTGATTTCATCTAATGTCAATCCGAATAATTTGTAATTTAATCCAAGCCATGGAGTTTTTCCATCACTTCACAGAT…
MsMYB099	MSAD_260349.t1	Medtr5g014990.1	At3g49690	At2g28080	PubMedID:27117388	MSAD_309900.t1	Medtr3g479490.1		√					√	√				√					TTTATATACCGTTTTAGATTATAATTTTTTTGTAATACATCTAAATCATTTCGTATCAAGAATTTCACATATTAACATAACCGTATTATATCACACCCTGACACGTATTGTATATGCAGACTTTATAACATAAATTTCTCTACAAAAATGACAATTAAAAAGAAACTTACTTGTATCATTGATTAAATCTAATAAGACTATCTTTACATAAAAATAACGCAACTAAATCATTATAAGTGCATCTAAATAACAACATTTTTGTTGTGTTAATGAAAATAAAATTTAGGTTGAGACGAAGATGCATTGTTTAAATCACATAAGACCTTAGTATTTGTTATTTTTTGGTGTTAACTTTCAATTCCAAGGAGAAGAGTGCCTCAATAATCGAAGTTGAATTGA…
MsMYB099	MSAD_260349.t1	Medtr5g014990.1	At3g49690	At2g16720	PubMedID:27117388	MSAD_220151.t1	Medtr4g073420.1	√		√			√		√									GGTGAAAATGTACTTTTTTAAAGTGATTTTTTTCAATGTTAATGGATAATGGCATTTGTCTTTTATGGGACGACTTTAATTTCTGTATGTAAAGATAATGTAAATTTTTTTAATATTGTGAATCGATCATAATCGATGAATTGTATTTTAATTTTTTTTACATTAATTATATTTCCTTAAAGATTTATCTAGACAATATTCACTTTAAAGATAATTTGTGATTGGGAGTTACGATCAGGAGTTACGACCTGATGCGTATTGATCCATACCGAAATAAAATCAGAAACCACCATTTTTGTGAGGTGGATTCTCTGTCTTTGTACGACGAGATATGGGAGTGATGGTAGGTAGAACACTGTTGATAAGAAGAACATTTCTTATGAAGCTAACAATCTCCAA…
MsMYB099	MSAD_260349.t1	Medtr5g014990.1	At3g49690	At3g19710	PubMedID:27117388	MSAD_228893.t1	Medtr4g092590.1			√	√	√	√	√	√					√				CATTTAATGTTCCTAGTTAAGCTTGATCATCCAGGCCATGCCTGACTCATCAGGTCACGTTAAACTCCACCTTTATCACTTGTGCTAAATTCATTCGCTTCTTAGCCACGCATGTTAGTTAGACACCAAGTTACTATCCAAGTGAAAGTTGTAGTCTCCTTTGAAGAGTTTCATGGCATGCCACATATCTTGCATGGACGAGTGACATGAGTCGCGTGTTCTTTAACTCCGCCTTGTATGGATATGTTGCATAAAGAAGGAGTGACCAACTCCACATGCTACGACATTCTTTCGATCGATGTGTGTGGATCTCAGATATGTAACTTAATTGGCCTGGACATCTAAAGAGAGACTCATTATGTTAAGAAAATGAGAACGATAAAAAAAAATGCTTAAAAG…
MsMYB099	MSAD_260349.t1	Medtr5g014990.1	At3g49690	At1g11990	PubMedID:27117388	MSAD_317481.t1	Medtr4g132590.1				√		√	√	√			√				√	√	AAAAATGGAAGCCTAAAAGTAATTTTCCGTTTTCTTTTAAATTCAAAATCCAGAGATGTTGAAGAGTCGTTACTAGTCGTTGAAGCGTTATGAGTCAGAGAGGATTTGAGGGTAGAGATGAATCACGTTGGATCGAGCCTTTGTGTAATGAACCTTATGATAATGATCAAGATAGCTATAATGATCAAGATATTAATAAAAATAACATCATTTACAGAATTCAATATAAATATTGGGTTTAAGTAATAACCATCAAATCAAAAGCATCTTTAATAAACTATTTTTAATGTTTATTGATTCAGTCCTTCTTCTTGATCATATAATTTGTAAAAATATGGTTTTTAATTTGATTCATTAAGAGACAACTATCATTATCAACTCAACTCAACGAATGCAACA…
MsMYB099	MSAD_260349.t1	Medtr5g014990.1	At3g49690	At4g17480	PubMedID:27117388	MSAD_232397.t1	Medtr5g013020.1			√		√		√								√		ATATATTATATAAATATAATATAATCACTTAAACTCGATTAAATAACTATTAAACGAAAGTGGGCGTTACACACCACACCAACGACCACCTTTCACCCCATTTTCGCTGCACCACCGAAGACACTTTATCATCACCTACAATCCACCACTGCACCACCACCACTGCAACAGAAAACCCCCACCCAAATGAACCACATCACCACCATGACACAAAATCTCCACCCTAACCACCATCTCCATAACTCGTGGATGGGTCAACCAAATCTGAACGAACAACACCTAATAACAACACAACAAACTGCTGGAGAACAGTAGTAAAACCGTCGTCAAAGAACAACAGCAACACCGCCAACGGATCTGACAAAAGAGGTGGTGCGGAGGACAACTCTCCCCATCGCA…
MsMYB099	MSAD_260349.t1	Medtr5g014990.1	At3g49690	At2g38740	PubMedID:27117388	MSAD_277869.t1	Medtr5g013910.1	√		√			√	√	√	√	√	√	√	√				CTGTTTGACGCATAAATTTCCTGGTGGCTGAGCGGTTGCTGACTAGTGACTATCAAAGAAGCATGCTTTTTAAGACAAGAATTTTGCCTAGAAGGGTGTGAATTCTGGTTATTCATTGCATTGAAGGCACTTGGTGTGGAGGTAGTACTGTACAGTGCCATCGAGTTGGGAGAATATTAATACAGAAAAGTGGTTGTTGCTTTCACATAACTTTTCTGAGCAATAGTTCTGTAATTTTCTCGTCTCCAAATTTTACCTCTTCCAGCTCATTTATTTACTTTTATTGTTTTTGCCGGAGGACAAAATGTGTGGATGAGAGGGTGATATTTTTTGTCATTATTCCTCTTTTCAGTTATCTGAACTTAATGATAGAGGGCGCCAATATTTTGCCCTTCACAA…
MsMYB099	MSAD_260349.t1	Medtr5g014990.1	At3g49690	At5g66120	PubMedID:27117388	MSAD_270062.t1	Medtr5g022580.1								√							√		TAAAATAAAATAAAACAATAAAGAAACAAAACCATTTGGTGGGTAACGTGCTCAACGTAAAGGTCGTTAGTAGAAGGTTAGGAAGGTTTATTCTCCCGAAAATGGAAAATCTATTCAAACTGACTGAAAGAAATTACAAACTTATACGTATTATACTACTTGTTTAGATTAATATTTACTCTTTTTCGTTCCAGTTTAAATGTAAGACTTTTAACTCTTTATCATTTAGATTAAATCAATGGACCTATCAAAACCTCACATTCTTTTTATATATTTTTTTTTTTTGAATAATGGACTTTTAACTCTTTATCTTTTATTAAATCAATTGACCTATTATCAAATCCTCAGATTCTTTCTTAGATCTTATGTTTAATATCTTAAACTTTTTTTAGGGATGTT…
MsMYB099	MSAD_260349.t1	Medtr5g014990.1	At3g49690	At4g24610	PubMedID:27117388	MSAD_212165.t1	Medtr5g065900.1			√					√		√							ATCATTACATCGTTCACAAATAAATTTAACCAAAATGCAAAAACTAATTAATGCAGCAACTTTAACTCTTAAAATCTAACATGCGTAATAAACCCTTTACTTTCATCAACTAATTCCAAACCCCATAACCCAAAAGTAGTAAATTCAGATTATGCATGAGGGATGAGGGAAAGGGGAAATCCATCTCTAAGTTTCTATGATGATGCTACTCCTATTTCTATTGCTCATCGATTCTCCTTCAATCTCTAGCTTTCTCCAATCTTCCAAATCCTTTCAAACCCTAATTTCTTCTTCAATCTTCTCTCCATAATACTCCCTAGAATCGTCAGTATCTCAGTCTCCGCAACCGTAGAATGAATTACCCTTGGCCAATATTAACTATTACCTTTCTTTCTTCTT…
MsMYB099	MSAD_260349.t1	Medtr5g014990.1	At3g49690	At2g30130	PubMedID:27117388	MSAD_276288.t1	Medtr5g083230.1	√		√				√	√			√		√				ATAAAAAAACATATTTTGCATGCAGATATTAATTGGTTTTTGTCAAACAAGCTAGTATTACAATTTTTAAATTTAGCCCATGATTTAAAATTATTAATAACCTTAATGCTTACTCAACCCCTTTTTTTTTTTTTTTTTTGTTATGTATTAACTCTCTTGTTTTTAAGAAATAAATCTAATAATTTAAAGTTCAATCCAGAGCCAAATAAAATTTCATCAACAATTATTTTAACTTATCTTTAAACTCCTGATTGTAATATTGTTGGTCAAACTCCGGACAATAAAATTTAGTATCGAGATGTAAATAAAATTTTAATGCCAAGTTCAACCAACAATATTTACTTTAAAATCGAGAAGTAAATAAAATTTGACCAATGAGCCTTCATTTGTTGGTTTAGT…
MsMYB099	MSAD_260349.t1	Medtr5g014990.1	At3g49690	At3g01500	PubMedID:27117388	MSAD_263403.t1	Medtr6g006990.1				√				√			√	√					TATATTAGAAAAGAATAATATATGTAAAATATATAAATGATTGAACTTTTTGTATAAAAACTATTTTACACAATAGGTATATAAAATTTATGGTTCTTTTTAAGTTATTCTTGAAAACTGTGAGTAAATTTATCAAACAATCAATAAAAATTACATACATGAATAAATTTGCAAGAGAAAGGCTAAATAAAAGCGATGTCTAGGGTTTATGGAAGCGAAAATTATTCGGTTTTGGCATGCTACTTATTTGTTGCATCCAGTGGTGGTTCTAAGGCCAATTTTTTTGCAATTTTTTATGTAAATTCTCCTGAATTTTTTATATAAATCTTTATAAATTTGACAATTTCTTTAAATTTTTTATTATTTACTTGCAATTTCTTACGTAAACTTCTATAAATG…
MsMYB099	MSAD_260349.t1	Medtr5g014990.1	At3g49690	At4g39540	PubMedID:27117388	MSAD_288334.t1	Medtr6g033510.2	√	√	√				√		√			√					GAAATTTCCCTGCAATATGCTGCTTTCTTTCTTACAATCTTCTTGATCCAATGCTTTTTGACTAACAATCTTCAGATACATTTATACGTCACTAATGTTGTGTTTTGAATCTTGTATTTGTGGATGCAGTGGCAGATGGGTTGAGATTAGACAATAAATTTGTCTGTTTGTAAGGTGAATGATCTATCTGATATTTTATAGTTATCCTCTTCATACGGTTATGCAACTTTGTTTAGTATTCAAGATTTATGAAACTTAACAATTATATGCAAAATTTTGATAAAATGTTGCGCCTACTGTATCGAACACATCAATGTACTTGCAGGCGAGCATATCCTGGTTTGTTTTGAGTTTGTGCTCTTTAATTTTAGGATTAAATAAATTTGGAAAAATGCAAAG…
MsMYB099	MSAD_260349.t1	Medtr5g014990.1	At3g49690	At4g09730	PubMedID:27117388	MSAD_213058.t1	Medtr6g039840.1		√		√	√		√	√		√	√						TTTATGAAAGATTAATAAATGAGACTGAAATCTAAAGGTGATTATTGTGACATATCATTCTTAAATATTTCTTATAAAATCATTCTTGATATCTAGCATTTTCCATCATAAAAATAATATGTATAAATAAAGAAAGAGAAGGTTGTACCAAAAAAAAAAAAAAAGAAAGAGAAGGAAATATGAGAGAGATGAATGAGTGATAAAGAAGAGAGAGAAATGGAATTATAAGAAAAATCATATGTAGAGGGTGTACCACAATAATATAGAGGCCAAATAAATCTAACTGTTAAGATCATGAAATAAATTTGTCTATGATGGAACATATGGAGCAAGTGATCCATATTAAAATTTTTCCATTATCTAACGTGTCATCACTTAAAATCTGATTGGTCCATTCAA…
MsMYB099	MSAD_260349.t1	Medtr5g014990.1	At3g49690	At1g61490	PubMedID:27117388	MSAD_295662.t1	Medtr7g056430.1		√					√				√			√		√	ATAAATTGGTTTCAAAATTCATTTCAGAACAAATATTCAAGACTTTCGAGCAATGTTGCCACAGAAACATGTTGAAAATATACCCCGTCATATGAAATAGAGATTGAAGGGATATCATTGAAGAAGGCCTCTCGAGCTCCAGCTACAGTGCCTGAGTAAACACTGAAAGGGAGTTAGATAGAACAGCTGTGGAAGAATAATTTCTATGGTAATAACTGCTGAAACAACTTTAGCAAAAAGAAATATTGAGTAGATTCTAAGTGGGTCATATCAAATTTCAAGGAAATGGAATCATCATCATCTGTTCATAGCTTAGGATGATAATCCTTTGTTATCTGAAATCAATAGAAATTTTTTCAACAGGTGTGCTTGCAAGTTACTCCATTTGCTATGAAATGC…
MsMYB099	MSAD_260349.t1	Medtr5g014990.1	At3g49690	At1g31860	PubMedID:27117388	MSAD_239659.t1	Medtr7g084480.1		√	√	√			√	√			√						ACTGATAAATAAATCTCTTTCTCATAATAAAAAATAAATAAATCTCTTTCTCGATATAATCACGTGATGAAATAAGAGAATCATTATTATCGATATGAGTTATTTATGATCATATGATCATCTGATCAAATGGTTAATCAGTTGATCAAAGAATCCGCTAAGCACCAAATTCCTTGGGCAATTACAATAACAAAACATTAGATTAAGAACTAGTCTTATAAATTAATTTAAAATATCAATAATTGTAGACATATCTTTGAAGCAATGTGGAGGCTTGGGTCCTAAACGTCTTTATCACGGGATGTGGAATTGGATGCTTCTTCATGTTCACTTGTGGACTAGAGTACATCACATAGATTTATTTCTAAATTTACACTATTTTTATATAAGATACACCTA…
MsMYB099	MSAD_260349.t1	Medtr5g014990.1	At3g49690	At3g09980	PubMedID:27117388	MSAD_262312.t1	Medtr7g104020.1		√		√	√		√	√				√					AGTTAAGGATGTTAATATGGAAACTTTGCATTGAAAAATGATGAAAAGTGGAATGTTTCACTTTCGAAAAGACAAAAAGTTGTTGTCTTTAATAAAAAAAATACTCCCTCCGTCCCTTAATACTTGACACAGTTGAACTTATTACGCATGTCAATGCATAACTTTGAGCTTAAATATCTTGAATAATATATTAGAAAAAATTATGAAAATTTGATATTTTGAAAATACTCATCGAGACGAATCTAACGACATCTTATATGATGTTATTTATCTTTGTATATTAGTTGAAAAATACAGTCAAAGTCAATTAGATCAAAATTAAAAAAATTTCAAATGAGTCAAGTATTAAGGGACGGAGGAAGTAAATAAATTTGACTGTCCCGTAAGTATTTTACGAGG…
MsMYB099	MSAD_260349.t1	Medtr5g014990.1	At3g49690	At3g05340	PubMedID:27117388	MSAD_223592.t1	Medtr7g113540.1	√		√				√										TGGTCCCTTTACGAATTTTGTTTTTTTGGCTTTAGTCCTTCTACAAATTTCGTTTTTTGATTTTGGTCCCTCTCACTGTGTGACTCATCAATAAGTTTGCCACGTCAGGCACTAGCACGTCATGGTCCGTTTGCCACATGTGCGTTTTTGTAACGGAAGTTGACGGGAGGGACGAAAATCAAAAAGTTATTAACTTATAGGGGTTGTTTTAGAACAAAAAAAGATACAGGGACGAAAACCAAAAACACGCCAAATTACAGGGACGATTTACATATTTAAGCCTATATTTCATGTTAGTATGAGTCGACCTTCAATCTAAAACAACATGTTGCTAGTTTTGAAATAAAAAAGGAACCGAAACTCCGAAATCGCAAAAAAAGCTGAGAAACACTAGTAAAA…
MsMYB099	MSAD_260349.t1	Medtr5g014990.1	At3g49690	At1g01225	PubMedID:27117388	MSAD_319685.t1	Medtr7g117750.1		√					√	√							√		TCTCGTTAACAATATATCATATCTATCACATCACTTCTTTTTATCTTTTTCACAAGATGTCAAATGGTTTTGGATGTACACCAATATTTTTCCTTCAAATTTTGTGTGATACACCATTATACCAAGTACTCACTCTGGTCACTATTATAAGCAAAACTCAACTTTCTAGATTCATTCAATAAAGGGTTAATATGCCTTTACCCCTGTAATATAGATCACTTTTGGTTTTGCCCCCTGTAAAATTTTCTTTTTGGAAAACCCCATAGGCTAGCTGACTCTGTATTTTCGTAGATGTGGCATGTTGCATCACTTTTTTTGGATGACGTGGCGCGCTGACTGTATAATTTTTTTTATGGGGTACACGTGGCATTTATGATTTTAAAAAAATTCTTAATTTTT…
MsMYB099	MSAD_260349.t1	Medtr5g014990.1	At3g49690	At3g61550	PubMedID:27117388	MSAD_279076.t1	Medtr8g028465.1					√	√	√	√							√		AACAGCAAACATGCTTATCTCCCAATAGCTGTAAGTGGTTCATTTCATTAAATCATGATTATATTCAAGTAAATTACTCTATGACTAAAAATTGTGCTCTTCAAAGTGTAGTTCAAACAACCTCTTTACTTCATTCAAATTATTTTCTAAACTCGTTTTATATTCTGTTAACCTCATTTAGATTTTCTAAATAAAATATTTTCTCATGGTGCTTGCTTCTGTACTATATTGATGTTATTATTATTAGTTTCTATGTACTATGCAGTATTAGACTGTCCAATGGAAAAGCTTCCTAGAATTAACTACAAAGTTATGTTGAGGATATGAAATGGCTATTGAATTAAGCAATTTAATGAATTGCCGGCATCCTCCTAATCAGCATTAATGTGTATCATGTAA…
MsMYB099	MSAD_260349.t1	Medtr5g014990.1	At3g49690	At2g45620	PubMedID:27117388	MSAD_317955.t1	Medtr8g033420.1	√	√		√			√					√					TAATTATGTTTCTAATTACAAATTATTTTGCTCCTTCAAAAAAATAATTATTTTGCTCTAATTTCACGATTGAAGCAAACAAATTAAATATCTTATCCTTTTTGTTTTAGACAGCAATCTTATCCTTTTTTTGTCAAAAAAATAAAAGGAATCTTATCCTTTCTTTTATCAATAACATTTTTTGGTTGATTTGAAAGTTTAGGAATCTAATTACATTGCTCAAAAAAAAAAAAAAGGAATCTTATTAAAAAATGGTTTGGTATTATTTTTCTAGGGGCCTTTTGCCGATGGATTTCTCTTTATCTGCTGACGGCTGTTTGTTTGCTCTACATTCTAATTTTTATTTGAGAAATTCTTAGGTGAACTCTTATTGTCATATGATCTACATTCTTTTTTCTT…
MsMYB099	MSAD_260349.t1	Medtr5g014990.1	At3g49690	At2g45430	PubMedID:27117388	MSAD_317888.t1	Medtr8g036060.1			√	√				√			√				√		TATGGTAAAGTCAGAAGAGGTAGTGTGTGCACACTCACAAGTTGAAACCAACCTCGTGTCCCACATGGTTTATGTCACCCACACCACACTAGATGTCACAGTGGCCATAACTTCAAAAATAAATTTAGGAAAAACATAACTTCATTTTGTTTATTTGCAGTTTGCACCCATGATCATTTTTTCTTTTTTCCCCTTTAAAATATAATATGACAAAACTACGACAAAAGTTATTTAATTGAATTTATTAAAGATATTTGGACTAATTCATTTTGATCTGTGGCTAAAATTTAGCTTGATATAAGAATGTCATCAAAAGTCTTGTTTGCAATTCAAAAAAGTAAATTATATCTTCAATTCACCAAGATAAAATCTAAATTATTATCATAATGATCCTTATAA…
MsMYB099	MSAD_260349.t1	Medtr5g014990.1	At3g49690	At5g55740	PubMedID:27117388	MSAD_257988.t1	Medtr8g066670.1			√				√	√			√				√		TGTTATGTTACATATAATGAACAGGAAAATGTTATAAAAACAAAGAGTGTGAAATACATGCCATTCTTGCCCTCTCTGGCTATCTTTCTTAATGGATTGTGTTGGACAACATATGCTCTCATCAACCCCTTCGACATTTATCTCCTGGTAATTATTATATATATATATATATATATATATATATATATATATATATATATATATATATATATTGTGAGTTGATAATTGTAGTTCAATTGGATGGAATATTTTTAATTAACCCATTGTTAATTAATATACATTGGTATTGAATATTTTAGGTCAGCAATGGTATTGGAGCAATCTCAGGTTTTGTTCAGCTCATATTATATGTTTATTTTTGGTGCAAGGGAGAAAATAAGAATGATGATGCTAATCATG…
MsMYB113	MSAD_268202.t1	Medtr4g073420.1	At4g38620	At5g37300	PubMedID:27117388	MSAD_224441.t1	Medtr1g008160.1			√	√			√		√		√					√	ATTTTTTTTTTTTTTGAGCAAGTTTTTTTCAAAAAACTTAATTAAATCTTCGAAAATCATAATTAAATTTTTTGAAAACAAGTTTATTTCAAAAAGTTTATTTATATTTTTTAAAATTTTGGAAAATTAATTTCCATATTTTTAAATTAATTTTTTATTTTTATATGTTTATTTTAATTTCGAAATATATTTTTTGTTTTTAAAAAATGGTTTTAAAATAATAAAATTACAAAATCTAGTGATGAGGGAGTATGGTAAGGATGTGTTCTTGGTTTGATCTAATGGTTAAAAACTAACTTTCCCATGGTGGGAAAAATTAGCCTTTCCCATGCTAAACTTCACCTTCAATCTATCCTTACCTACTTTATGAGTTTTTCACTCTCCCTCTATCTTTTTGTG…
MsMYB113	MSAD_268202.t1	Medtr4g073420.1	At4g38620	At4g33010	PubMedID:27117388	MSAD_300713.t1	Medtr1g016230.1	√					√	√	√	√		√	√	√			√	CATTTTTGCAGCTAATATGGCTTTGTTGTTTTTCAATGTTGTGGACAGAAAAGAGAAACAGACTCTTTAACAATAAAGCTAAGGCTCTGTTTCCTGTAGGAGACATGGCTTTTTTTTTTTTGGCAAAATAAATATGAACCATTGGATAAAAGTAAATTAACTTTGGATCAAAATGCTTACTATATACCTCCCACACCGAATTACTTTCTTTTATTCTAAATTACTCTTCTCTTTACTTCTAAATTACTCTTCTCTTTTATTCTAAGAAAAAAAAACAGTCATGTCTCCATCATTATCATCGTCGTCCATAACATCATCATGGTTAGACTTAGAGACATAATCTCGGCGCCGTTTATGGTAGGAGACTTGAATAGGTCTCCCACGGGAGGAGACATTAAA…
MsMYB113	MSAD_268202.t1	Medtr4g073420.1	At4g38620	At1g75030	PubMedID:27117388	MSAD_308256.t1	Medtr1g021945.1				√		√	√	√				√					TGTATAGTTTGTGTCATGCTAACATACGTGCCCTGAAAGTAATGTTACATTCTACAATGTATTATTAAGAATAAATGGATACAACTTCTAATAGGTCATTTCTATTTTTTTTTTATATAAAACACGTTATTTTTAATTATAAAAAAAGTAATTAATATTATATTGAAAACTGAAATAAGTCAATTTTTTTGGGACAATATTTTTTACAAATGACTCACTTATTATAGGACAAAAGGAATATCAATTACTGCGTCCCTATGATAAAGTAGCACAACTTGTTATGGGCCGGCTAAAGCACTTAGGCCCAATTACTTAGACCCAATACAAATACAGCCCAAATTATGAATTTGACAATATTACTCGCAACACACCCCTTCTCCACGGGGGATGGGCTCGGAG…
MsMYB113	MSAD_268202.t1	Medtr4g073420.1	At4g38620	At5g42800	PubMedID:27117388	MSAD_304609.t1	Medtr1g022445.1					√		√	√				√	√				GTCTCTTCATGTCACCGCTCAGTCAAAGTTGTACATAGGCTTGAACTACCATTCTTGAACACTGTTACAAGAAGTTGGACAAGAACATAAGCATGCACTAGATTTCAAAACCAATCCAGATGCATTGTTGGGCTTGGCAACTCACTTAGACTTATCTTATTGTCATGCGATGCATCATAGTGCTTGATTGCGCCCCTGAAATGATATAATTAAATAAACATAAATAAGAAAAAACACTTGAATTTGACCTAGATAATTTTATTTACTTCTTCCACCCAAATCTTGACGGCAATATGATGCGAGAAATCAGGTAGTAGCGAGAAGTCAAAAGCCCACTAACAAATGTCATATGTGGTGATGGAGCATGAAGTTGGTCATCGTCTTGAACCTCATATTGCT…
MsMYB113	MSAD_268202.t1	Medtr4g073420.1	At4g38620	At1g75410	PubMedID:27117388	MSAD_304590.t1	Medtr1g023050.1	√			√			√				√				√		GCCTAAAACAAAGAAAAAGGAAATAAAATTAAAGAAGAAAATTTCGTGAAAGTTCTTTGGAAATAAAATAGGCAAAAAAAGAAGAAGATCAAATGAGTAATACAATTAAAATAATTGTGAATATTTCCGTAAAAAGGAAATAAAAGAAGAAAATTCCGTGAAAGTTCTTTGGAAATAAAATATTCACTATTATTGAAGATCAAAGCAGTTATAACAAAAAAAATTAAATTTAAAGGAGTAATACAATTAAAATAAATAAGGAAGGCAAATCAATAAATTAAAAACGAATTATTAAGAAAAATCAATCAAAAATGATAAAGATCGCGGAATATTCTCAAAAAATAAAAAAAATAAAAAAAAAAACAGATTTGAGGTTTCCTCGGCAGTTAACTGCCGAAG…
MsMYB113	MSAD_268202.t1	Medtr4g073420.1	At4g38620	At1g70700	PubMedID:27117388	MSAD_322831.t1	Medtr1g031930.2		√	√		√	√	√	√			√	√					TTAGTATTTTATAGTTTTTTTGTTGTTGAACCCTTCTTAATTTTTAAATTACGTGATTTTGGTCCTCTTAATTTTGATTGTGTAATTTTGACTTCTGTAGTTTACCTTCCTTTTTGATTTAATAACCCCAAATATATTTTGATTAAGAGAAATGATATTTGTACAACCATTTTTTTGATAACTTTTAGACAATTTTCTCTTTCATACTCATATTATATTTTTAATCTTTTTTTTTTTTTTCTCTCTCCATTGTTTTTAACCAATAAAAAGGAGGAAAAAGAAGTTATCAATAAAGTTGTTAGCAAATGGTTGTTCAAATATTATTGCTCTTTGACTAAATGTTGACTAAGTTGTGTTTACAAGTCACTTTCAAATTGAGGTGTCTTGTTTCTATTGGAC…
MsMYB113	MSAD_268202.t1	Medtr4g073420.1	At4g38620	At5g63830	PubMedID:27117388	MSAD_322835.t1	Medtr1g032200.1							√	√			√	√		√	√		ATACAACTTAATCAAAAGAGGGGGTGATTCCAACTATTTCTCAATCTTGTGTCGGAGTGTGTGGTAGTTTAGAGGATGCGGTTCATCTATTTTTTTCATTGCCACTATTTTTGTCAAGTTTCGATCACGGTTTATGATTAATTCAGGCTTTGTCATGGTCAATCTCTACCATAATTCTGATCACTTTACTCAGTTCGATGAATTGGGAGGCTTCTCTAAATACAAACGTGGCGTTATTCAATTAATTTAGTTTTCCACGGTTTGGGTGAAAAGAAAGAAATTCAAGAATTTTCAAGGATACAACTGATATCATCCATTACTTGGTTGACAAAATTAAGGCGCAATCTTTTAGGTGGCCGAAAACGAAACACATCTACTTTACTTTTAACCACCACATGT…
MsMYB113	MSAD_268202.t1	Medtr4g073420.1	At4g38620	At1g25220	PubMedID:27117388	MSAD_326862.t1	Medtr1g033480.1	√	√										√				√	TATTCTTCAAAGGACTACACCCAAATCAGGCAAAGGATCACTGGTGGATAATCAAAGGATTTCAAACGACTCTTTAGACGTGCTGATTATCTCAACGTCTCTTTCACGCCTCTATATAAAGGAGTGAAGACTTGAAGATTGTAGATAGAGATACATAAGTTCAAAAGCGCCAAAACTCTGTCAATTTGATTCTACAAAGCACACTGAATTTCTGCACTGATTTGATACATCTTAGAAATTCAAAGTCTAGAGTCTTTTCTGTATTGTATTGTGAACACCACTGATTGTATATCAAGTGTTCAATTCAAACTCAATTCTCTGTATTTTTGTTTGATTAGAAGTCTCTTGCCTGCGTGCTTGAGCATTAGAAGTCTCTTGCTTAGTGCTTGAGCATTGGAA…
MsMYB113	MSAD_268202.t1	Medtr4g073420.1	At4g38620	At1g20990	PubMedID:27117388	MSAD_314502.t1	Medtr1g034960.1			√	√		√	√				√					√	CATTAAGTTTACTTCTAAAAAAAACAGTAGCACTATATTGGAAAATCTGAAAAAATAAAAAAAGTTAAACCAATTTTAGTCCTTCAAATATTGTATTAATACGATTTTATTTTCTCTTCTTTTGCGATCTTTTTTTTTTTTTGACAAATCTTCTTTTGCGATCTTAATAATTCTTATTTTCTTCAATCCGACATATAGATAGACTACTTTTCCTACGTGGAAACCTATAATGCCATGAGGCATATGTGTGACATCATGGTTATGACTGCTAAAATTTTAGTATTAAATCCCAGTAAAAAATCATCTGTCTTAAGTTTTTACGAAGAAAAAAACCGTAGATAAAAAAAAATCATATTTCAAAATTTGTTTTAGATCTTTAAATTATTATTTTCGCATATT…
MsMYB113	MSAD_268202.t1	Medtr4g073420.1	At4g38620	At3g10650	PubMedID:27117388	MSAD_272710.t1	Medtr1g040610.1		√					√	√				√	√			√	CATTTTCCTTCAAAAAAAATACTTTTTTTATAGTATGATTGTTACTTTCCTAAAAGAAAAGAAAAAGTTATCTTCTTTGAATAAAAAAAAATGACAAATACCTCAAATTCGTCCTTGAATTTTTAAAAATCGGCCAAATCCGTCTCTAAATTTTGCGAAATAGCTCTTTTGTCCTTGAATTTACAAAATGTCAATCAAATCAGTCCCTCCGTTAAGTTGGTTTGTTAACGGAGGTGATGTGTAACGTTATCTCTTACAAGGCTTACCACGTCAGATGCCATGCAAGCAGGGACCAAATTGATGGATTTTCATAAAATTGTCAACGGCTCTTTCTCCTCTTCCTCATTAACAGCTCTTTCTTCCCCAAATATATAAATTTGAAACCCTAATGTTATAATT…
MsMYB113	MSAD_268202.t1	Medtr4g073420.1	At4g38620	At3g23160	PubMedID:27117388	MSAD_271541.t1	Medtr1g044135.1			√				√					√					GTACAAGGAATCTACTTCATTCTTCACACAAATCAAAAAACCCTAATTTCTAAGACATGTTACATACCTGAAACAGTATTTTGGATTGTGGTCTTGGTTCCACCATGATGGTCCATCTCCAGTTTTCTCTTTACCCTTCTCTGCCATGGTCGAATTAGGTAGATGGAAGCAAGGAAGAAGAAGATTTTTTCGTTTTTTGGATTCGTATTTGGAAAGGAGAGCAAATCGATTTGGGAATTTAGGGAATCTAGGGTTTCTATATTGTCTCCTACTTATATATTTTAATTTTTAATTCATTCTAATTTCTGAAAATGATAAAACGTTTTTCCATATTTCTAAAAATAATTTGATGAATTTATAAATGATATTATCCAAATATGCATTGTCACATAGGTTTTT…
MsMYB113	MSAD_268202.t1	Medtr4g073420.1	At4g38620	At5g06250	PubMedID:27117388	MSAD_287092.t1	Medtr1g058350.1			√	√	√		√	√				√	√	√	√		TCGTGGAGGCCACATCGAGAACAAACAGGGGAAGGAGCAATGTTTCTATGGTTGAGCATGGAAAGAGTCGGCACCGAGTTGTGGCAAGCCAACCAAAAGAATAATTTAATCTTTTCCGGCATATGAAGCTTCCAAATCCAAGAACAAGAGGGAGGAGGATTGGAGATGATTACCAGTTCCTTGCGAGAGAGAAGCCAACTGTATCCGCTTTTTGGTGTATAGGTGCCATTCTTGTTGTTGTGCCAGATGAAAGTGTCTTCTACTGAGGCATTGAACTTGAAGTGAATGTTGTTGATGGTGTCAGCCGCAAAGGGAGGAAGTTGGGTGTAAAGGATATTTGTATGAGGATTATTTGAGGATATCACATCTTTCACTGTCAATTGGAGATCATGGATGTCA…
MsMYB113	MSAD_268202.t1	Medtr4g073420.1	At4g38620	At3g11550	PubMedID:27117388	MSAD_252657.t1	Medtr1g058540.1		√	√	√			√	√	√			√					CAAAGATTATCTTGTTTGTGCATCACTATTTTTATCCGTATACCATACATTAGCCAATTTGTCTTCTTAAAATAACCTTCTGATTTGCAATTTTTTTTACACCTGTACTATATACTATTGGAATTTGATATATGGAGTCTTTAACAGATGTGGCAGTTGAATCTTAATGGGACCCTGGTAAATAGTTATTCTGGCTTATGTGCAACAGTAAAACCTGTCAAAGGTGAAATTCGCAAATACTTGCCATTTTATGGAAATATTGTCCTATGCAATTTGTTGGGTTTATCTTAGTTTATCATTATTCATAATGCTGTTTGGTCATTTGTGCAGCTCCTATTAGTTCTGCTGGTTTTCGCTCTTGGGTTGCAACAGGAAGAACAGGTCAGTTCTCTTGATTTT…
MsMYB113	MSAD_268202.t1	Medtr4g073420.1	At4g38620	At2g36210	PubMedID:27117388	MSAD_287065.t1	Medtr1g059770.1		√	√	√				√					√	√			GGTATACAACCAATTTTAATTTATTTTGTAAATGTCAATTTTGTGTGTGCTTCTTTACACGTCTAATATTTTCTGACGTGAACTTATAAAAAACAGAAAAACTCTAACATGAGTAGAGATGCATGCTTAAACACAAATTTTCATTTTCGGAGACCGCATGTGGTTTTTTAATTTCTTGCAGAACATACCACGCAGAAAATAACAAGATAAAAAGATTAGCCATATGTTATATGTCACTCTCACCGTTGCACATACCTATCAATGCTACAAAATCCATTTCCCCCTATCAAACAACAAAAAGCCATGATAACAAACAAGAGGACAATAGGTAAGAAAAGGATTTTATTAATTTCAGTCTAAATTGTGCTTGGTGGTTTAACCTTATAACCATAGCTGTTT…
MsMYB113	MSAD_268202.t1	Medtr4g073420.1	At4g38620	At5g02840	PubMedID:27117388	MSAD_274319.t1	Medtr1g067000.2						√		√			√		√				AGGCAACGACATCAAATTCTAAGGTACAATGCATACAATATGGTTACTTTACATCTTTAACTAATCCAAGGTCTCATAACTTCAAATTAGTCTAATGTAAATTCATGCATTTGGGATGAGGAAAAGGGGAACTCTTCCTATCCTATTTCTTAGATGACGACGATGATGATGCAAAACCCTAAGCTCCCCTTTTGCTCCCAACCTTTTTCCCCAAATCCCTCTTTAGCATCATAAACTCTAACTCAATTTCACCCTCTTTATTTCTAAATTGCTAAATTACAAAAGAAATATACCTATTATTACTTTATAAAATAATTATTTTAAATATTTTTAAAATAAAAGTTACACGTTTGTAAGATCTAATTCAACTGACGACGTCAATATTAGTAGATCGTACAT…
MsMYB113	MSAD_268202.t1	Medtr4g073420.1	At4g38620	At2g37430	PubMedID:27117388	MSAD_257353.t1	Medtr1g067650.1		√		√	√	√	√	√		√	√	√			√		TTTGTTAACTCGCCATAATTAGGGTCTTTGACTCCTAGTAGACGCCCCACGGTATCTCACGACTTAAAGTCTTTTGGACTCGCTATGAAATTAATCCTCAAATGAGACAGCAAGGCATGGTTACAATATGTTTTCCTCGTTAGTTCTCCTATGTCTCAATAGAAGTTATAATGTGCGAATATTTTTTTAGGGTCATTGTTTTATATGCAGAGAAAGGGAGAGTCGTATAAGACTTGCCTTTTTATATTTTTTGCAAAGCTGAATATTTATGTTTGGTCTGACTTTTACTTGCTTATTCATTCTTCATTATCTCCATGGTTTGGTTTAATGGCTTTTCAGGTTAGGCTAGTTGCAAGTTCTAAGCGTGACTCTTTTATTTTATGCCCACATTTTTTGTTT…
MsMYB113	MSAD_268202.t1	Medtr4g073420.1	At4g38620	At1g04360	PubMedID:27117388	MSAD_327800.t1	Medtr1g074190.1	√						√	√									AAACCGAATCAATGTTCAAGAAGAACAGAGACCGACAAGACAGAAACAAACAAAAGACGTTGTATATAGGCGGAACACCCAAAAGTAAACTACACCTCATGCATCAAAACACCCATAAAAACATCACCCAACCGATATCTATCACCAAACAGAATAAAAACTAACCAACACTACAACCAACAGCAAAGAATTAATGCCAAGTCACACACAACTGCATAATTCAAGTTGAGCTAAAACCCCAAACTCTATAGTGAATGCCATCTGAAACTAGTTCCAAACATCTAACACCCGCTACTTACACAAAAGCCTCCAAAAACCAAACAAAACACATTCCCGCTGCTGAGCCCAAAACCCCCCGAAAAACACGTAATCCATCATAGATTCAGAATTCACCACCAA…
MsMYB113	MSAD_268202.t1	Medtr4g073420.1	At4g38620	At1g76560	PubMedID:27117388	MSAD_311325.t1	Medtr1g087030.1			√	√		√					√		√			√	TTTGATTTATATAGCTGATTGTAGTGAGAAAAGGTTTATATAGTTAATACTTAATAACTTGAGCTTTTCTGAGTATCCTCTGCGCGGAACTGCAGATACTAATAGTTGAGTCGGATAGAACCATAATAGGAGACAAACTCTCATTCAAGAGATTTAACAGTGCTGTATTCTTAAACTGAATTTGAATTCATGACAAATTCCTATATACTTTGGGTTATCTTTATCTTTAGTTTTACTTTTTTTAGGGGATCTTTACCTTTAGTTATTCACTCAAGTTTTAACCAATAACTAAATTGAATGAGTCATTAAATGATATTGACATCTCTATATAAAAGTTACATTTATGTATGAGTAAATAATTTACTAATAGAATGGAAACTGTGAAAATGACATTCCCTT…
MsMYB113	MSAD_268202.t1	Medtr4g073420.1	At4g38620	At5g04410	PubMedID:27117388	MSAD_313904.t1	Medtr1g090723.4		√	√				√	√	√		√	√				√	AGTTTTCGTTGGATTTGTCTTGATTGAATTTTTGTTATTTTTTATTTATTTGTGATTGGATTTGATTGACAATTGGTTGTATGAGTTGAATGTAAATTATGTAGGGTTTGAAGCATGTGCTAGAAAGGAATCAGCTTAGAGAATCACTTGTGGACATGGTAGTTTTTAGTACCATTTTGCGGGCTCAAAATGTTATTGTTTTCTCTCATTCCTTGATTTTAGTAGGTGAAATTTTCTCTATATGGGAGTTTCCATTTTTTCTTCCAATTGATTTGTGGAAGAATCTTGGTTCTTGTGAGAGGATTGTGTGGGACTAATTTAAGTCTTATATTTTTCAGTTGACATGCTACAAGGTTTAACATACTCATCATGAAACCAATCAAGTGGCAAATTCTTTTG…
MsMYB113	MSAD_268202.t1	Medtr4g073420.1	At4g38620	At1g35580	PubMedID:27117388	MSAD_236599.t1	Medtr1g096140.1			√	√			√	√						√	√		ACCTAAATAGCCCTTTTAATTAATGACGCACTTCTCCTAAAAGAAATCACAAATTATTGATCTTGTGGCATCTCCATATCATAAAGTGAGTGTGTTTTGTCTTATCTAATACTACTAGTATTTATCTTCTTTTTTGACTAAAGATAGTATTTATTTATCTTATTTTAGTACTATAATGCTTTAGAATTTGTATTATGATAAATACAAGTGTGTGTAGACCGTTGTTGTGGAGTCTGTGGTGTTTTGCATGTATGTTTTCACAATGCAAATTGCATGATTTTCATTGTCGTGCTAGTCGTGTGGTAAAGGGCGTCCTGCTATATAGCACAACTTTTTATTAAATAATAATTATATTACTTTTTAATAAAAACTTACTTTATTTGGTGCTTAACCAATGCC…
MsMYB113	MSAD_268202.t1	Medtr4g073420.1	At4g38620	At5g62210	PubMedID:27117388	MSAD_213732.t1	Medtr1g102420.1					√	√	√	√		√	√	√					CAAAAACTGTATAAATTATTATTTCAATAAATAAATTAATTAATTTTTTTAATCAAAACAAAACCAAATCATTAACCACTATCACAATTTTCTCTCCAACATTTATCATTGAAACGTAAACTCCTCTTTTTCTTTTTGGGAACACAAAACTTCATATATGTACCAATTTTATCTCAAACATCTTTAAACAAGGCTTCCTTTAATAACATTCTTTCTCACTCAGATACTATATATGTTCCTTCATTTCTTTCTCACCATTATTTCTGCTTAATGAATTTTAATTGAAAAATTGATGGGGGGACTTTCTTGTAGGTGACTTATTTTCTTGTATTTTACCCGCACAATTTTGTTTTTTCTTATACTTGACGTTTGGAATGTTGTTACATAAACATAATACAT…
MsMYB113	MSAD_268202.t1	Medtr4g073420.1	At4g38620	At4g34230	PubMedID:27117388	MSAD_270181.t1	Medtr1g107425.1	√						√	√							√		TAGAGTAATACACACATTTTCACAAAATTATTACACTTTCCACATTTTATACTTTTAAATATTTCTCCAAAATCTAAAATAAGAACAATTAATAAATACAGTTCTCAAATTTTTATTTAACAATTTGTCAAAAAAGAATATTTTTAACGAATGATAGTACACTATTTATAAAGGCATCATAAAAACAACGATAAGAAAGTATTTTTAGACAGAAATGATAAACAGATGCTAGTACAATACCTATGATTTCTTTGACAATAGTACAATATTATAATCCATCCGTTTCAAAATGAGTGTCGTTTTAGTCAATTGCACACAAATTAAGGAATGAAATCAAATAATCATTAAACATAACACTTTTACTAAACTATTCTTACTTTATACTCTCTCCGTTTCAAA…
MsMYB113	MSAD_268202.t1	Medtr4g073420.1	At4g38620	At2g01140	PubMedID:27117388	MSAD_309258.t1	Medtr1g109200.1			√	√			√	√								√	TAAAAACTATTAAGACGAAAATGATGATTATATAAATTGTTTTAAATTAAAATTGAAAAAATGGATTGGGTTAAAATCACCATGTTTACGATAATTATATTTTTTCTCTCAATTCACGTCGTTGATACTTTAACCAATATTGTTGCCCCATAAACGAGTACTCGCTGAACCAATAACATGATGGACATACTAATTTTCAACCTGACCACATCACTTCTTTTGTGCATCTATCATAGAGATTTGTCGTCTCAATTTGATAAAAAAATTACTTTTTAATTGCTGGAAATTAACTAAAAGCATAGCTGCTCTTGATTTAATCTGTATAATTCTGCAACTAATCCACTGAGAGTATATATTGTCGCATAGCAGCCGCAATTAACACTCTACTTGTCCATCAAG…
MsMYB113	MSAD_268202.t1	Medtr4g073420.1	At4g38620	At5g23290	PubMedID:27117388	MSAD_277040.t1	Medtr1g114500.1	√	√		√		√		√			√						TGTGACACTTGACGTCGACTCTACTTCACTGCCACATCTGAAGAACGAAAGTGTTGTTGTCATGTCACTTGATATGATTTTTTATTGAATTTTGGTTAAAATAACACAATTGGAAAAGAAAAAAAAATAAGTCCTAACCTTTTATCCAACAAATTTTAAATAACAATTTTGTCCTCTGAGATGTATCAACTACATCGAATTCACGTGGACTATCACATCTTTATTTTAAGAGAAATGATATTTGTACAACTTTTGCTCTCATACTCACATTATTTTCTTATTCTCTCTTTAACTTTTTCTATCTTTATTATTTTTGACCAATGAGAAGAGAAAACAACAAGGTTATCCCAAAAGTTGTACCAAAAGAGTTGATCAAATATCAGTACTCTTATTTAATGT…
MsMYB113	MSAD_268202.t1	Medtr4g073420.1	At4g38620	At5g08580	PubMedID:27117388	MSAD_277063.t1	Medtr1g115135.1							√	√			√						ATAAAACTCTTCATATTTTTTAATTTTTAGTATCAACAACAACAAAATTATGAATTTTTATGATTAATATAAATAAAAAGTTTTAAAAAAATGTTTGGTGTATCATTCCGACTACCCGTTTATCCATCAAAGAGCGGAATTAAGATAAAAATTTAAACTCCATCAACTAAATTGTTATTGACAAGTTAAAAACAGAGCGGACCAAAACGAGACAGACCAACCTAATTTGTCATTCCTAACTAAATCAGATTCATCTCATATTTGGATAACCAATTATGTAATTATTAATGATATTACTTATCATATAAATGTTTTTTTAGGGGATATTAACGTTTATTTATATTAAATAAAATCAAATAATTTTTTTTAAACAAAATATTAAATAGAATCAAATAATTT…
MsMYB113	MSAD_268202.t1	Medtr4g073420.1	At4g38620	At5g23010	PubMedID:27117388	MSAD_212692.t1	Medtr1g116500.1	√		√		√		√	√	√						√		TTATCATGAATTTCACAATAATTATATTTTTTTTGGCTTAAATATGTCTTTCGTCCATGCAAATATAGGTCATTTGAATTTTCGTCCCTGAAGTTACTAATCCTTCCAATCTATCCCTGCAAATATTAATCATTTGACTTTTGATCCTAATTAGGTTTTTTTGCTGAAGTGAGCTGTCATTAGCGACGTGGTGCCCATGTGGCAAGTGATGATTGAGAGAGGTGGTTTGCTTAAATAGGTCTTTCATCCCTGCAAATATAGGTCATTTGAATTTTCGTCCCTGAAGTTACTAATCAGATGTAATTAGGACCAAAAGTCAAATGATTAATATTTGCAGGGGCAGATTGGAAGGATTAGTAACTTCAGGGATGAAAATTCAAATGGCCTATATTTGTAGGG…
MsMYB113	MSAD_268202.t1	Medtr4g073420.1	At4g38620	At4g03330	PubMedID:27117388	MSAD_220968.t1	Medtr2g012270.1	√						√	√			√	√					CTTGGATTGGGCTACCTCAATACCCAAAAAGTAACGGAGTTTACCAAGGTCCTTAGTCTGAAACTCATTAGAAAGATGTTGTTTCAACTGGAGTATTCCATGTTTATCACTACCAGTTATGACAATATCATCTACATAAACAATAAGATAAATGCACCCTTGAGATGAGTGACGATAAAAAACAGAATGATCGGCTTGACTACGAATCATACCAATTTGTTGCACTACTGTGTTGAATCTGCAAAACCAAGCTCGAGGAGATTGTTTAAGACCATAAAGAGGTATATGCAGCCGACAAACCATGGTAGATGACTCCCCCTGAGCAACAAACCCAGGTGGTTGCTCCATATATACTTCTTCTTCAATATTACCATGAAAAAAAGCATTTTTAATGTCAAG…
MsMYB113	MSAD_268202.t1	Medtr4g073420.1	At4g38620	At4g03000	PubMedID:27117388	MSAD_296823.t1	Medtr2g020870.1			√	√			√	√				√	√		√		CCTCACTACACTCCCCATCAATTTCTCCCCCCAAGCAACTAACTGACGCCACCATTTTCAAGCTTTTCCACTAAATCAAACAACCGCCAATACAATTTAAATATTATTTATTTCATTGAGTCTAAATGTGTAAATAGGAACTGATGCCCAAAATATCATAAAAAAAAAGTGTAAATAGGTATTTTTCTTCTTGAATTGAAACAGTCGATCGATGAAGTCCCTAAAATATATAAAATAGAAAATTAATCTCATAAATTAAAGAATAAGTTTAAATGCATAATATATGCAAGGTTCGGGGTTCAAACCTTGACCACCATAAAAAAAAAAAAAAAGAATAAGCTTAAATAGAGTTTTGACCCCAAATTTTATAATTGCTTGATTTTGGTCCTGCAAGTTTGG…
MsMYB113	MSAD_268202.t1	Medtr4g073420.1	At4g38620	At2g35760	PubMedID:27117388	MSAD_250183.t1	Medtr2g026530.1			√	√		√	√	√			√		√				GTTGAAGGAAAATTTTAGAGGGACTAAAACGAAAACTTGACATATTTATAGGGACCAAAAATATATTTAACCCATTAATTAATTATGATAGTTTATAAAGTTTGAGTTAAGTCCAAAACTTGCTTTTTTTTTACTGGTCCTAAACTTCTTTGTCAGAGCTCATTTTTTTTGTCAAGTAGTCATTCTAATGATTAGAGGTCACATATTTTAAACGTGGATAAGTGGGATGGATGTCTGGGGTTCTAATCTCAACTATACATATATTATGCAATTGAGCTAAGCATACGGAGACATTAGAATTCATTTATCTCGACATCTAAATGAATTACGTTTGTGTTGACGTATTTCTACATAAACATTTATTTATATTATATGATTTTGTTACCACTTATTAAATTT…
MsMYB113	MSAD_268202.t1	Medtr4g073420.1	At4g38620	At4g17220	PubMedID:27117388	MSAD_250167.t1	Medtr2g026590.1				√		√	√	√				√					TGTATAGTTTGTGTCATGCTAACATACGTGCCCTGAAAGTAATGTTACATTCTACAATGTATTATTAAGAATAAATGGATACAACTTCTAATAGGTCATTTCTATTTTTTTTTTATATAAAACACGTTATTTTTAATTATAAAAAAAGTAATTAATATTATATTGAAAACTGAAATAAGTCAATTTTTTTGGGACAATATTTTTTACAAATGACTCACTTATTATAGGACAAAAGGAATATCAATTACTGCGTCCCTATGATAAAGTAGCACAACTTGTTATGGGCCGGCTAAAGCACTTAGGCCCAATTACTTAGACCCAATACAAATACAGCCCAAATTATGAATTTGACAATATTACTCGCAACACACCCCTTCTCCACGGGGGATGGGCTCGGAG…
MsMYB113	MSAD_268202.t1	Medtr4g073420.1	At4g38620	At2g34790	PubMedID:27117388	MSAD_218673.t1	Medtr2g031390.1		√	√			√		√	√		√		√			√	CATTAGCATTTTGGTTATCTTGCACTAAGAACAGCTTGATGAATGGAGATTATTCGTCACTTTAACAATATCATTTCGGTTATCTTGCACTAAGAACAACTTGATGAATGCATTATTTGTCACCTTAAGGACCAACATGTATAAACGCACTTTTTCAAACACCAAATGCAACAGAAGTTGTCACTCAGAGAATCAAATTGTATATCAACCTTAACTCATAATATGGTACACACTGGAATACGGAGTCTTGTCGTTCTGAATATTCTACATTCCAATTATTTGTCGGCGTTAATCATTATAATTGTAGGGATTCAATAGTCTAGGTTATTTTATTTACTGGTGTCAAGACTAAAAATACTAAGGTACCGAATTTCTCTATTGTAGTAATATCACTTTCAG…
MsMYB113	MSAD_268202.t1	Medtr4g073420.1	At4g38620	At5g44720	PubMedID:27117388	MSAD_252559.t1	Medtr2g035470.1		√	√				√	√				√					AGAAGTGCATTTGAGAATCTATATGGATTGCACTACAGTTGTTACTACTACTTTTTTACTTAGTAGTCTTGAGACAAACATGGTCTATAGTTTTTTGTTTTAGTACAATTTTTGTATACTTTTTTAAATAAATTAAGAGGTCAAAATATAAATTTTTGACAAAAACAAAAAAAAACTTTTGAATTATATTACTCGAGCAACGAATTGAACCTAACGAGCCGAACCGAACTGTTCGTGAATTTTAAACGAGTCAAATTCGAGCTGAAAAAAGAGTTCGTGTCGAACTCGAGTCGAGTTTCGAGCCGAGCAAATTTTTATCGAGTCGAGCCAAGCTCAGACAGGTTCGATCCGACTCAACTCATTTCCAACCCTAGTCACGACTTTGAACATGTTAAGAGA…
MsMYB113	MSAD_268202.t1	Medtr4g073420.1	At4g38620	At5g57330	PubMedID:27117388	MSAD_296962.t1	Medtr2g036810.1				√							√				√		TTTAATGACAATATAGAAAATTAGGGTTATGGATAATGGTATTTAGTAGGAAGAAAAACTTAAAGAGAGTTCTTGTATAATTGATTGGTCAAATTGTCAAATATGTATGTACTTGATGGAAAACATGGTAGGGTGGGTGAAAATTAATGGTTAAAATAGCCTTTATCTTTGTATTAGTTGTTTTGACCTCATCGTACAAAAAAACATTCCTCTTAAGGTTATTGGTGTAAATCACTTTACTCAATTTGGATATCTCTTTAGGAGCAAGAAGAATAGGAAGATTCATTGTCTACCGTTTGGTCAATTTGGTTCCATAAAAATGAGATCATTTTTGAAGGGAAGAAGGTGACTTGCAAGGACGTGGTTAAACCTATATAAAAGTTATTTCATGGGGTTTGA…
MsMYB113	MSAD_268202.t1	Medtr4g073420.1	At4g38620	At3g58000	PubMedID:27117388	MSAD_266394.t1	Medtr2g061720.1			√	√		√	√	√			√	√			√		AAATTCAAACCGTGAAGGTCTTGGTTCCCATCCCACAAGTGTAATATGAACCAGCAGTTTCTTAGAATCCAAGGACTATCTTTTAAAATTCTCTGTGTGTCTTCTTCTTTATCCATCTTAATTTGGAGGATCTTTCCTTCAAGTTCACTGATTTTCAGCCCTGTAGGTTTGCACCAGATACCTGCAAGAGTGTTGTAGAGAACTTGTGCATGGAAAGGCTTATCTGATAGGATCTTTTCAATTAGGCTATTTTGACAATTCTTGATGCTATCTTGCCAGTGGCTGTCGTAGTAGGAGATGAAAGGATCATCCTCTGAATCTTCATTAGTTTCTGATTGTTATTGTTGATCTTGTGCAGGAATTGGATCTTCTTGGACGATGTTGTGATGAATTCCACTA…
MsMYB113	MSAD_268202.t1	Medtr4g073420.1	At4g38620	At2g31900	PubMedID:27117388	MSAD_293266.t1	Medtr2g062660.1				√			√	√			√			√			GTTTTGTCAAGCGTGATGCACATAATGACAAAATAGTCAACTGCTCTTATTTTGTTGTAGCATCAAGCAAATATCTTTGAAAATTAAACTAATCATATGATTAACCATTACATACTAGTTTGCTTTTATTATATATATATTTATTGGCCGACATTGCATTTTTTTGTTTGTTTTTCTTTGGTTTAAACTTATTTTTGGCCCCCTAACTTTGTAGTAGTTGCGATTTTGACTGTATTAAAAAAAAAATCACATTTCAACCCTTAAGTTTCCCTCTTTTGCAACTTTCAATTTTTTTTGAAGAAGCTAAATTAACCCACCTAAATTGATATCAGAGGGAATCGAACCTGAGACATTGGGGAGGAGCACACTTCCAAGTCCCAAGCCAATACCACTAGACCA…
MsMYB113	MSAD_268202.t1	Medtr4g073420.1	At4g38620	At1g79180	PubMedID:27117388	MSAD_274867.t1	Medtr2g067420.1			√					√			√					√	TAATATTCAACACAAACATTGAGATAAGAATTTCTTTTAACATTGAAATATGATGACCATACAGCGTGAATGGAATTTCTTTTTTATTGTGAATTCAACTTGAATGGAAATTACGTGAACAAATCATGCATGGAACATATATATAAATCAAAGTTAGGTGATAGGTCGTTCTTTTTTCTAAATTGGGTATTGTTGTTGAGGTAATTAAAAGGCAGGTAGAATATGGCCAATGAATTGTATATACTTTTTTTGGGTAGAAACAGACAGGTCATAAAGTACTTGTGAATTCGTTGAGAAAACCATACCAATAAAAACTTGATGCGTGGAGCAAATTAATACCAAGTAATCAAATCAAGCGGGTAGCAAATAATCCAAACAAAAAGTAGACAAGAGATAAAA…
MsMYB113	MSAD_268202.t1	Medtr4g073420.1	At4g38620	At1g17230	PubMedID:27117388	MSAD_233260.t1	Medtr2g070020.1		√	√				√				√	√			√	√	TCATTCTCTTTGATTCTTTCACCGGCCTTGTATTTTCGTCATGTCATAAAAATGATTTTAAGACTGGAATCTATTGACAAATAAATGTAATTTACCTTTTAATTTTGTTAATGGTCAGGTATATGTTGGATCTTACTCGCTAGGCATGGGAGCAATTCCCTGGGTTATAATGTCTGAGGTAGCTTCATCTTAATATGCCGGAACTCGTTAAAATTTACATGCAAACATAATAAATTCTCACTCCCTCAGAATGATATGATAAATGGTTATATTTTATTTTTCAGATATTTCCTATTAACGTTAAGGGTTCTGCTGGAAGTTTAGTAACCTTAGTTAACTGGTTGTGTTCTTGGATTATATCATATGCTTTTAACTTTCTCATGACTTGGAGTTCAACAG…
MsMYB113	MSAD_268202.t1	Medtr4g073420.1	At4g38620	At4g28290	PubMedID:27117388	MSAD_294299.t1	Medtr2g090340.1			√	√	√		√	√			√						TCTCACTATTTTTTTTTTTTTTTAAGTTTTCATTAGTCCTATCTAATATTACACATCAAATATAACACACACAATGCAAATACAAATTAGGTTTTAATAAGGGTGAGCATATAAGACAAAAAGGGGTACTTAGTTCCCTTCAACTAATCAATGAGTTTATCCTTATGGAAAATTATGATATATAAAAGGGTTAATTATGTTTTAGGTCCTTATAAATAGGCGCGTTTTCAACATTAGTCTCTATTTAAATTTTATTAAATTTTTGGTCCCCCAACGTTTTTTTTCATTAGCAAAATAGGTCATCGCTGTTAATTGTTGCTGATTGAGCAAACGGTGAAGCACACATGGATGCCACATTTGACTCTTTTTTTTGGTTAAATGTATGTTTTTAGTCCATGT…
MsMYB113	MSAD_268202.t1	Medtr4g073420.1	At4g38620	At5g44130	PubMedID:27117388	MSAD_265939.t1	Medtr2g090765.1		√	√				√				√	√			√		TGAAAGAAAAAGGCTTATATACTTATGTTAAAAGTGACATCTCGCTTCGCGAGGTGCAGCTCGCCATGGCGAGCTGGGCTTTCTTTGCCATTGGGTTTCTGCCACATTATCAATTGTCCTGAAACCACCTGAGCTCGATGTGGCGAGCCCCTGTCTCTCAAAAATCAGGCCTCTCTGGACTTTTCTCGCTCTGCACTCGCTTCAAGCTCGCCATGGCCTCGCTGTGTCGTGCTACTGGCATCCAAAAATGGGGTCTTTCTGGAGTTTTCTCGCTGCAGGCTCGCTTTAGCTCGCTGTGGCAAGTGAACTTTTGTACTTTGATGTTTTCTTTGCTAATTTCAGGTTGTGGCTTGCAATTTCCTACACAATGGGGGGTGAAGTAAGGCACACAAAGCATAA…
MsMYB113	MSAD_268202.t1	Medtr4g073420.1	At4g38620	At2g42360	PubMedID:27117388	MSAD_265924.t1	Medtr2g090950.1	√		√				√				√					√	AGATTGGTTTCCCACTCAAAAAATTGGCGCCTCCAACTCCCCACTAAATGAATCATTAAAGAGTGTCTCGAGGAATCTCAAAATCCTTAAAATTATATGAGTAATGAAACTGCTATTTGAGAATTAAAAAGGTGAATTTCTACCACTAGGCTACTAATTTATGCTAAACCAAGCACATATTAAGCACACGACATTACAATTCTCCCCAAAGAATCCTTCCCTTAGGGATGACATTGGGTACCCTATGGGTAAGGTCGGTGCCCTTCCCCATACCCGCGTTTGTAAAAAAATACACGTACCATCGCGGGCAACAAATTTAGTGCCCTTCCCCACCCATACCAGCACCCACCCATTATCTGCACTTTAACTATGAAAAGACAATAAAAATATAACAATTGA…
MsMYB113	MSAD_268202.t1	Medtr4g073420.1	At4g38620	At1g72970	PubMedID:27117388	MSAD_270742.t1	Medtr2g100070.1			√				√	√									TATTTGGTCAAAATTTTAAAGCTGAGCCATTAAAATGGTTTAAATCATTTTATTTGGTCAAACAAAGCTGTACTGCATTAAAATTTTCAATATATATGTCCAAATTTACGAAAGAAAAGTACAGTGATTTATTGTGACTTTGAAAAATAAAAATTCAGCATCTCAATATACTAGTTAAATAAGCTTTATTACGGCAATTTTAAAGAATATTTTATTAATTTGACCAATATTTTATATTCTTTTTTGACATATTTGGGTCAATATTTGATATTCTTATAAAAAGTTTATTGATGTTTTTCTCATTAATAAAAAAGTCGATTAATAAGAACTTTTTTTTTTACTCAATTTTTTTGGGCACAATTCATTATATATATTTGTATCCGTCTATCCGCTATTCTT…
MsMYB113	MSAD_268202.t1	Medtr4g073420.1	At4g38620	At4g29410	PubMedID:27117388	MSAD_310791.t1	Medtr2g100410.1		√		√	√	√	√	√	√			√					CAAATGGTCTATTCTCTGCACAAGCAGCACCAAAACCTCCACAAGCCATGTACACAATAGTTGAAGGAATGCGAGTGGGTGGAAAGGTGATCGAAACACCCCTTTTGATTTTGTTCTAGTGCGTCATCTAATGTTTTTATTAGCTAAAAATGCATTTCATTTATTTTCTTATTCTTATTTTTCTCTTGAATGATGGTTGCAGCGAACTGTGATTGTTCCTCCTGAAAAAGGGTATGGAAAAAAGGGAATGAATGAGATTCCGGTAAAGATCTGTTCTTGTCATCTCATGTCTTTCAACATAGATTCTAATTTAACTTCCTTAAATTCTGCTTTTCATTGTTGATCCTGATGTCCCCATCTAGCAAATCTATTGAAACATACACTTAGGACAAGTGCCTT…
MsMYB113	MSAD_268202.t1	Medtr4g073420.1	At4g38620	At5g25890	PubMedID:27117388	MSAD_310762.t1	Medtr2g100780.1	√		√				√	√	√	√	√						AATTCTGGAAATTCATGGATAAAGAATTCGTGTTTTGATTTTTGATGTTGCACTTCTGGAAATTTGTTTCTGGAAATCATGTGATGTTGTTTCTAGAAATTTGTTTATGGTGATTGTGAAATGAAGAAGGTGAAGAATGAATGAACCTGAAAGTTGTAATTGTAATTTTGTTGGTTCTTGTTGTTATTGTTATTGATGAATGATAAAAATTATAGTAGAGACAACATCTTGTTGCTGTTTATGAATGTTGGTTAAACAGATATGAATATGATGAAGAAGAGTGAAGAAGAAGATGAAGAAAAGGGAGAAATAATTAAGTGTTGTTTACTCACCGTGTATAATCCAATGATCATTCTTTTAAAAAAACATATCAAACGGTTAAAATTTAAAAAATTAATG…
MsMYB113	MSAD_268202.t1	Medtr4g073420.1	At4g38620	At3g21230	PubMedID:27117388	MSAD_299015.t1	Medtr2g105570.1			√		√		√	√									TATAAGAAATATTGACCAAATTTTAAGTATGTTTGAAGCTAAATTTCATTTGTGTCCTTATTTATTATGAGATAGAATATTAAAAGTAAGTAAGTTGGTGGAATAAAGAGTAATTAATTTAGGGGTATTCATGATTTTTTTTTTTAAATGTAGAGGTGTATTAACTGAAGATAACTATTTTCAATGTATTTCCTTGGTCTTGATGTTTTATATCTTTTGTTTCTTGTATAAAGGACCGGAGGGAGTATTTTTCAATTGTACCTACAATATAACAAATATTATGTCTTTTAAAAAATATATAACAATTTTATTAAAAAAAAACTTTATGATTTTAATTAAAATTATAGGTATAGATAATAAATATTTTACACTTTCTACTATCTTATATTTTTCAATTTT…
MsMYB113	MSAD_268202.t1	Medtr4g073420.1	At4g38620	At4g33730	PubMedID:27117388	MSAD_255367.t1	Medtr2g435490.1			√	√			√	√	√		√				√		GTGAAAATGAAATAATAATGTTGGAGGAAATATAAAACATTGTTGGGAACATTGTTGCAAATATGTTGTGTTTTACCTTTTTAACTTGAGTTTAATGTTGAAAACAAAAAAATTATATTGTTTAAAAAAACGGCACTAACCGAACCAATCAAAACCACATTGGTTTGGTTTGGTTAAGATAACTTTTTAAAAGTCAACCGAATCGAACCAAACTGCATTTTTTCTTTTTGAAGAAACTAAATTAACCCACCTAAATTGGCACTGGGGATAATCAATCCTGAAACCTCAAGGAGGATCACATTCCCAGGTCCCAAGCCAATACCACCAGACTAAAACTGCATACTTTTATCCCATGGTTAAGATGACTTTTATGCTCAAAACTAATCAAACCGTACCGTA…
MsMYB113	MSAD_268202.t1	Medtr4g073420.1	At4g38620	At1g33800	PubMedID:27117388	MSAD_332821.t1	Medtr3g005710.1					√	√	√	√	√			√				√	TACTAATTTTATAACCAAACAAAAAATAAGGTTGTAATAATAATTGATGATTTATTCAAAAAGTAATAATATACACAAATTTATTTGATTTTACTAGTATTAGTGTAATTTGTATTGAAAATGTTTTTTTTTGTTTTTTAATTTCTATCAAAAATATGTATCTGCATATTTTTGTAAAAAAAAAAAAAAAAGTATCTGCATAAATTTACACCACCCATCAAAGCTTAATTTTTTTCTTTTAAATCGGAGGAGGCGGTTAGGGGATCTAATGGGGAGAGGGGTGATTGGGTATTATCATGGCGGAAGAATCTCTTCGTTTGGGAGGAGGAAATTATAATTAGCTTGTTGGAGGACTTGGAGCGGTATACCAGGGGGATCATCAGGATAGGTGGTTTTGGA…
MsMYB113	MSAD_268202.t1	Medtr4g073420.1	At4g38620	At2g43760	PubMedID:27117388	MSAD_282092.t1	Medtr3g041720.1			√		√						√	√	√			√	AGCTTAAAATCTAGACTGAAACGAAAGTTGCAACAATATGTGAAACCAACGAATCTAAAAAGACTAAAATACATTTTGAGATACATTCAACAACTAAAAATGTATTTAACCCAACTAAAAAACTACAAAACAAAAACAAATTATAGTATCCAGCCTTTTTTGTGGGAAAAATAATCAGTTTCGTCATTAATAATCTTTCAATGTATCAAAATTCTTATTTTGCAGAAAACATTAGCCTTGAAAATGCTTTTTTTGCTGAATTGTCTGGTGCAATGAGGGCTATAGAGCTAGCATGTCAAAAATAATTGGAGAAATTTATGGCTTGAACTTGACTTTGCTTTGGTGGTACAAGCTTTCAAAAACAATTATGTTGTTCCTTGGAAGCTAAGAAATAGATGG…
MsMYB113	MSAD_268202.t1	Medtr4g073420.1	At4g38620	At5g37450	PubMedID:27117388	MSAD_327169.t1	Medtr3g062590.2				√		√	√	√									CAACTTATTGTACTTTTAATTTGTTTATAACTATTGTTGTTGAAATATTTTCTACCTATAGTTGTTTTTGAGATTGAAAGTATCAATCAAACCAATATAAATATATCTATCAATCATGTAGTAATTTTTTTCCTTCTTATTTATGCTAATTTTTGACAAACCAAATTTATTTGGGGTAACTCAATATTTATTATTTGGGATAGCTAAATGTAATTTTATACTGATCAATTCAAGAATAATTTATTTTTTGAGGTAGCAAAGGCTACCCCATCCTCTTGAGAGGAACCACCCCTGTGTGGACTCATAACTGTTGCACCATTTTCGTAGCAAAATGTTCACCATCAGCAATGACTTGATCGTCTACCGTAATCCAGGAATCTAGCCAATAGGTTGTCCTTT…
MsMYB113	MSAD_268202.t1	Medtr4g073420.1	At4g38620	At2g38860	PubMedID:27117388	MSAD_243254.t1	Medtr3g064140.1	√	√					√		√		√	√	√				CCCCCTTCCTTTTTATGCATTTACATGATCCAAACAGAATTCTTATTATTTCTATATACAGCTTTAGGTCCAATCATTGTTCTGTAGGAAGTCCATTTTGAGTCCAAGCAGCATAACCACCAGCTATGTCTGTGAGTCCAGTGAACCCCTATACAATGCAAAACAGTTGTCACTACACAATCTTTGAGCTTAAAATTTTAAAGAATTTAAGATAATAAAGTATCACTTTGAAATTGGAAAGTAGTACAAACTATTTTTGTTTTCTCTATCAGGTTTTGTATCATCTAGCATTCAACAAAAATAATAGGTCCAAAGTCGAACAAGAAGTGAATGGGGGAATTTAAAAGCTGAATGAAAGATGACAGTCAAACAAACTAGGAAACTTTTTTCAACTGCAAT…
MsMYB113	MSAD_268202.t1	Medtr4g073420.1	At4g38620	At1g17200	PubMedID:27117388	MSAD_243266.t1	Medtr3g064310.1				√			√	√			√					√	AATATTATCTTCAGTGCTTATGCTATTTATTCTCTTAATTGAGTTCGTCTTAAAAAATAGTTGTTGTGAGGTCTTAATACTATAGTGTAAGGGATCGATGGTTTGAGAGAAAATTGAGTGAATAACGCTTTAGTTCTTTGTTTGAATGTACATGTAGAACATTGAAAGGGGTCTTAATACTAAAACGATCTTTGTTTGTAATCTTGATTCGAATTTTTTGATTGATAGTGGTGTTGATCTCCCAGAGACAGGTCATTGTTGGCTTGAACTTCGTAATCAATTTTGTGTCTATTTTCTTTGCTAATTTTCTATATTGCTGGGATTTAACTTTCAGCAACAGAGTATAGTTTCACCATAATTCTAATTCTATTTTCAACAATTTTTCTAATAGGAGCGTCA…
MsMYB113	MSAD_268202.t1	Medtr4g073420.1	At4g38620	At3g03190	PubMedID:27117388	MSAD_320832.t1	Medtr3g064700.1				√	√		√	√	√								CCTGCAAAATCTTTTGATTTTGAAAAAGATCCCTGTAAAATATTTTATTTTTGAAAATAGTTTCTGAAATATTTTGTTTTTGAAAATAGTCCCTGCAGAGACTATTTTCAAAAACAAAATATTTTGTAGAGACCAAAAACAACAAAAATTTTTTACAAGGACTAAAACCAAAATGAGACATATTTGCAGGGACCAAAACCATATTTTAGCGAAAAAAAAAATTGGATAATATAACTAAATTCTTTCTTATTTATTTTTCTTCATTTTATATGAGTGTGTTTAAACATTTTTTTATTTGTATTTCTCCTTAGGTAAGACTTGCTCGTGAGTATGAGTGTTGCTCCTTGCCTACCTCAAACTAGCAGATGACTGAGGTGGGTGTTCCACAACGGTATTGGC…
MsMYB113	MSAD_268202.t1	Medtr4g073420.1	At4g38620	At5g16570	PubMedID:27117388	MSAD_288925.t1	Medtr3g065250.1			√		√		√								√		ATATATTATATAAATATAATATAATCACTTAAACTCGATTAAATAACTATTAAACGAAAGTGGGCGTTACACACCACACCAACGACCACCTTTCACCCCATTTTCGCTGCACCACCGAAGACACTTTATCATCACCTACAATCCACCACTGCACCACCACCACTGCAACAGAAAACCCCCACCCAAATGAACCACATCACCACCATGACACAAAATCTCCACCCTAACCACCATCTCCATAACTCGTGGATGGGTCAACCAAATCTGAACGAACAACACCTAATAACAACACAACAAACTGCTGGAGAACAGTAGTAAAACCGTCGTCAAAGAACAACAGCAACACCGCCAACGGATCTGACAAAAGAGGTGGTGCGGAGGACAACTCTCCCCATCGCA…
MsMYB113	MSAD_268202.t1	Medtr4g073420.1	At4g38620	At2g39710	PubMedID:27117388	MSAD_218280.t1	Medtr3g068000.1			√	√	√	√	√	√						√			AATTTCTGTTATATTTTTTCTTAATAATTTAATTTAAATTTCTTGTTGTTTTCATGGGTATATGATTTTTATTAGTAGATAGATGAAGTGACAAATAATCATTTAAACTTAAACACATAAATAATTATCGAAGTTCAAACCCAATCACGATATTCAACCTTATAATTTTGGTATTTTGTCAGGTGAACTAGAACTTGCGGATTTCTATATATGATTTCTAGTAGCGACTATGCAGACAATTTTTTTAGGGAAAAGTGGCTATGTGCATATGACCTCTTAATTTTAATTGTAGACCCTGCTTAGTAAATTAAATTAAATTAAAATAGACGAGTTTAATGAAATATATACAGTGATGTAAAGTTATTGGTGGCAACTCGGATAGTATATATACATACACTT…
MsMYB113	MSAD_268202.t1	Medtr4g073420.1	At4g38620	At1g77690	PubMedID:27117388	MSAD_232783.t1	Medtr3g072870.1						√	√	√			√	√	√				TAAATACTAAGTTTTATCTATAAAAAAAAAAAATAGTATTCATATTTTTTAAATAATTTAGTATATCTTTGTATGATTTTATAAGAAAAGTAATTTATATGTCATTTTTTGCTCTTGTTTTTCGGTAGATTCTTTTCATCAAAAGTAATTTTATTTAAAGCATGTCAGGTATTATATGTTGGTATCTTTCAGTCAAAACGCAATTACTTCGCCGCATTGTGAGTGTCTAGTCTCTTCCACTAGATCCAACCTCTGTTGATCTTTTTTATATTCTTTTAATCAGTCAAAATAATTATTTGCACTCTTCGCTGATATTGTGAAAATAATACATAAAATGTGTTTTTTGGTCGCTTTTTAAGCAAAATCTGTGTGCATATACATTACTCTCTACCCAAGACA…
MsMYB113	MSAD_268202.t1	Medtr4g073420.1	At4g38620	At5g50560	PubMedID:27117388	MSAD_316060.t1	Medtr3g085020.1	√		√		√		√	√	√			√			√		GTATCAAATACTCAATAAATACAACATAAACATTGTCAAGGGACAATTGGCCCCAATCTACAATGTTAAATCTGTTAGCATTCATTATAGTTAGTGGAGTATGTAGATAATTGAAGTACAATAAATGAAAGTTATTTACTGAAAAAAATGTCATTTTTTTAAGGAGAAAATGTTGTATTGATATTATAAAAAAGATGAAAAATTTAAGACAAAAAAAATACTATATCCGTTTCTTATTATAGAAAAAATGTTTATTTTTTTGACGAAAATTAGGCATCCTCCGCGCGCAACTGCAGTTACTAATCCCTCAAGTCTCGTGGGACGCAATTGGGTGACAAACTCTCCTCAAGAGTTTTAACGTTGTTGTAAGCCTAAGGTTGACTTCGAGCTTAAAACCTT…
MsMYB113	MSAD_268202.t1	Medtr4g073420.1	At4g38620	At5g65160	PubMedID:27117388	MSAD_316264.t1	Medtr3g087480.1			√	√			√				√				√		TTATTCTCCACATATATTGAAACACCAACCCTTCATGACTTATGAGTCCAAGTCAATCTTCTTATCCAAATCCACCTCATTTTAAATAACAAAAGAACTTGTATTGCAATTAATTACAATATATAGAACTTCTGTTCTTAAACAGTGATTTTTTTATAATAAACAAGATCAAATATATGATCACGTATTCATATTATATGAGCTGCTTATCACTCAGATCACACTAATTTAATGATTTCTTTTATAAATTGATAATATGGAGAGGATTCTTTGTAAAAAAAATATGGAGAGGATTTTAACTGATTTTAATAATCCTATTCTCTTTTATGTTAAAAATTTGTGACAAAACTCAAGTGTTCTTTATTTTTATTTTTTGGTCAAGTAACCTAGTAGTTAGAC…
MsMYB113	MSAD_268202.t1	Medtr4g073420.1	At4g38620	At1g21740	PubMedID:27117388	MSAD_316311.t1	Medtr3g088190.1			√				√	√				√					TCAGAAGATTTATATTCTCAGTGACTAAATTTTGTCCGACAAAATTACTCATTTAATTTAATTTTTTTTTGGTCGAAAATATATTTCATTCATTCAATAAGCTGTAACAGCACAAATTACACCATGTGCAGATCACTATCCACTATTGGGGTAAAGTACAGAATTTTGCAAAATCAAACAGATAAAACTCTAAAGCACCATATTCGCTCCTGACTTAGGCCCCGTTTGGATTGGCTTATTTTGAGCTTATGTGGGCTTATCTACTCCCATAAGCATTTTTAAAGGTGTTTGGGTAAATAAATAAAAATAGCTTATCATAGTTTCATAAGTTGCTTATGCCATATTTTAATAAGCCTAAATTTTCAGCTTACCCTCTGGCTTAACAAGGAGCTTATGAAT…
MsMYB113	MSAD_268202.t1	Medtr4g073420.1	At4g38620	At3g56410	PubMedID:27117388	MSAD_280698.t1	Medtr3g093780.1			√	√		√	√	√									TTTTTTTTTTTTTTTGACCAATTTATATTAATCTGTCAAACTTCAAAGTTGTTTGAGAATAATGTTAATTGGTGAAATTGTAAAACTTTGTGAAGCAATGAATAATATTGAGGACAAAATTGTACGATAGAGTAAACATCAATCCAAATAACATTATGTAGAATCAGAATCCAATTAGAAAGCTCTACAAAATTTATGGTACATAAATGAAACTGAAGAACACATCAGCAAGCGACGACATAGTAGACTTGACCACACTCGTAATAGCGCAGAAAATCGTAGCTATGCAGAAATGCATAAACCAGATACACTTATAAACCAACCTATAACGCGAATTATGCAGTAAATCATGAACATTTAAACGCAACAATGCAGAATCGTATATATGGGAAAATTCAC…
MsMYB113	MSAD_268202.t1	Medtr4g073420.1	At4g38620	At3g56350	PubMedID:27117388	MSAD_229776.t1	Medtr3g094250.1					√	√		√	√			√					ACCACAGGAACCCTGTTGTTGTAATAATAATATTGACTAGTTCATTCTTTAATTTTTCTAGTTTACATAATATTTGCAAATCTAAACATTTGATGTGTGGGATGAGCAATATTAACTGAATAGTGGGGGAACAAATTTTCCCACCACTACATTTTCGAAAGAACTACAAATGACTTGAAAGCGTACTTTTGGACAACATAATTGATGTCAAGTGTACATTTGAATTGTACAAAAGTTGTGTTTATTTGGAATGTGTGTACATCCGAAGTTATTTTGAGAGGTGATAAAAGTTTCTCACATCTGGAAGCTTGTATCTGCATGTGCAAAAATTGGTGGCTTTTTAGATGCATACTTCTGTGTTGATGTTGGGAGGTGGAGAAACTTTTCTCCTAGCCTTTT…
MsMYB113	MSAD_268202.t1	Medtr4g073420.1	At4g38620	At5g59845	PubMedID:27117388	MSAD_230123.t1	Medtr3g102660.1				√	√	√	√	√				√	√				ATATATATTATACAAAAAATAGCATATAATGTTAAGTTTGAATATTCATTGGTAAATAGAATGAAAAGTATGCTTTTTTTTTTTTTTTGAAGAAAGAATGAAAAGTATGTATTAATTAATATCTTAGAAAATATTGTATTATTAATATATAACCTATTTAAAAAAGTTTACTTGAATATACTATTATGTTAACTTTGTCAACATAGTTTAAACAATTCAGTGTTGTCCTTGCATAACATTAACAATATGGTTTTTGTCATCTATTTCTATAGGGTCTGTTGATTTACAGCAATGCTATGCTATGCTTTGGAGTAGCTGTGACTTGTGAGTGAGGTAAAACTAGGTATAAAATGAATAATTTAATCATCCTGTCTCGTATATAAATTTAATATTTCGTTT…
MsMYB113	MSAD_268202.t1	Medtr4g073420.1	At4g38620	At5g10750	PubMedID:27117388	MSAD_255225.t1	Medtr3g105780.1			√				√		√		√				√		CTCACCAATCCAATTAATAACTTGACAAAGATAAAAAAAACCTCATTCGCATAGTTTTAAATAATCCATTTTCATTTTTTATATAAACAAATGACAAGATTTTTTTACCACAATTCATTGTTACACCAAATACAAGAATGGTCACACATAATCATTTTAGTTTGAATCCTAAATCGCGCTAGAATGCAATCCCACAATAATCTTTACACAAAAAAAAGTAGCAATCGATGGAACTTCCAAGTCCAACCTCCACACAATCATCATAAACATGTAAATAAAACGTATCAATGAGATTATTTACGAGTAACGTGTAAGCATATTTAACTGTAAAATTGTCTTGTGAATTTGATCACCATGTTGGTATATCTTCTATAATAGATGAAAGAAGAGGAGTATTTA…
MsMYB113	MSAD_268202.t1	Medtr4g073420.1	At4g38620	At4g38270	PubMedID:27117388	MSAD_255063.t1	Medtr3g107930.1			√					√			√	√	√				CAATTATTGAAAAATAGGAGATTGCAAGAAATTCAGGAAAAACTAGCATTTTAGGAAATAAGAGATATTAGAGGTGTATTAGTGAAAATGAGGTTTAAGTTAAAAAGTTAAATAGTGTTTTAATTAAATAAATAAAAGGAGGTGTAAACAATGGAGTTGAATAGTTACAATAGAATTAGTAATCATTTGGGAGGTGTGGAGATTAAACATGTTAAAAAGTTATGACAAAAGCAGACTTAATAAGTGGTTATAAATAGACGATTTTTTTTTTAAGAGAGTTAGGTTATAACACACAAGAACAAAATCGAGAGAAGTGATAAAGAGGAATTAGGGATGTGAAGAGAAGAACATAAGGAGGCAAGAAGAGAAGCTTGGGGAGAGACTCAACCATAGAAGTTG…
MsMYB113	MSAD_268202.t1	Medtr4g073420.1	At4g38620	At4g31450	PubMedID:27117388	MSAD_293844.t1	Medtr3g108808.3			√	√	√	√				√	√	√			√	√	CAAGAAGCAAACCTAATATCAAGTCGTTGTTTATTTATATATATTTGCATACCAATTAAATAATTTGAAGAAACCAATGTATGGATTCCTCAAAGGTCTTCAATTATAGAGACTTTAAAATCCTTTACCTACAGAAATAATCCCTCATCTTCCCAAAGACTTTCAAATACTCCCTCCGTCTCATATTATAAGCAAAAAAAAATAATCACATTTATTAAGAAAACTAAAATATAGTAGTTTGTAACATAGTTTTTTTGTGTTATCTTTGAAATAAGTTTTATAGGAAGATGTAAAAACAATTTTTATTGGTAGTTGATTATAAAGAAAATGAAAAAGAGAGCAGATTGAATGCACTTTACATTTAATTTTCCTTTGAAAAATATAATTTTTTGAAAAAAC…
MsMYB113	MSAD_268202.t1	Medtr4g073420.1	At4g38620	At4g35270	PubMedID:27117388	MSAD_226874.t1	Medtr3g115400.1		√	√	√	√		√	√			√				√	√	TATATCAACTTTTTGTTTTAATCCCTCTAATTTTTTTCTTCCACTTTTAGTCCTCAAAAAAAAAATTATTTTCACTTTTGGTCCCTCATTTTAAGTAAACTCATATATAAATTCATATTTTTTAATAAAATTGTGTAAAAGTTTATAATAATATAAGAACCTCTCACGATTTATTTTTTGATTTTTTTAACAAAACATGAATTTTAATATTTTTGGTGGTTAAAAATTCATATTTAATTCATGTTTTGTTAAAAAAAATCTATTCTTTTGGGAGAGAATTTTACAATATACTACACATTTCCACACAATTTCATTAAAAAATAAATGAGTTGGCTTAAAAATAGGGATCAAAAGTGGTGATTGAAAATTTTATAGAGACTAAAAGTCGAAGTAAATTTT…
MsMYB113	MSAD_268202.t1	Medtr4g073420.1	At4g38620	At2g30860	PubMedID:27117388	MSAD_301065.t1	Medtr3g450790.1			√	√			√	√			√						CACTAACAGAAAAATTTGACGGAGGGGGTAAATTGACTAAGTTGTGAAATTTCAGGGGGTAATTGAAGTTTTGTTAATTTCAGGGGGATAATTGATGAAACTTACAATTTCAGGGGGGAATTGACTATTTACTCTATATATATATATATATATAGTGAAGGTAAACGTAACGTTCTCATTTTTTTTTTGTTGGAAAAAATTATCGTCCTTGTTCTTATTCTCTACAATTCTGATATATCAGACAAAAATAACGTGTCATTTCGCAAAAAAAAAAGGTGACATTAAATATTGAAATAGTCCCACAAAAAAAAAACGTAACAATTGTAACGAAAAAAACTTAAACGTAACGGTAAAAAAAATATCTTTTTCTATTGAGAAAAAAAAAGGATATTTCATTCA…
MsMYB113	MSAD_268202.t1	Medtr4g073420.1	At4g38620	At3g58780	PubMedID:27117388	MSAD_329604.t1	Medtr3g452380.3			√				√	√									AAAGCTATGAGAGGTTTAAGTAATATGCGTAGAAGTTACACAGATTCAAATATCATTGTCTCCATTATACACAAAAAAATTATCACGGCATTAATTTAGCTTGGGTGTTAGGATTCATTAGTAGTACTGTAGTGTATTGTTTGGCATTAAGAAAAACACACATAAAGACGGATCACAAAAAATTCAGGACATGGCCGTATACGGATATTTAATTAATTTTGAAAGATAATTTTATGTGGCTTGGAAACATGGTAAAAAGAAGCAAGACGAAGGCAAGGTAAGACCAATATAGTGGTATACACATGAGATGTAGATGTTTGTCCGATTACAATTTTTGTATTAATTAGGCAGGACCACATGGGGAAGCCCTGCAATTTTAAGACACTAGCCAACACTACA…
MsMYB113	MSAD_268202.t1	Medtr4g073420.1	At4g38620	At5g48930	PubMedID:27117388	MSAD_297133.t1	Medtr4g007540.2	√			√			√	√								√	TTATATGTAGTGTTGGAGTTCGAACCCCACACACCCCTTTTATTCACTTTAAAAAATTAAATTTCTAGCCAATAGACTATTTGACAAACAAAAAGATCATTTTACCAAATTATCATTATTAATTATTGGTTTGTTTTCCACTAAATTAAAAAAAAAATATTGAGAGTTATGTACGTAATATTAATTAAATGATACAATTAAAATAAAAAATTATTATTGTATTAGAAACTAAAAATGACATTCATTTTATGATTTCTTATTTGCTATAGTCACACTTATTTTAATACTATCTCAGTTATTTCTTAAGTGTCGTTTTGATATTGTTTACACGAACCAATGAAACTTTTAAATTTTACTAGTATTCATAAACAATTTCATATATTTCATTTATTATCTTAA…
MsMYB113	MSAD_268202.t1	Medtr4g073420.1	At4g38620	At1g15290	PubMedID:27117388	MSAD_240352.t1	Medtr4g009960.1				√			√			√	√			√			TTCCATTTAATCTATAATGGAGTAATCATTAACCTATTCAATACTACTATAATGGTAATAATAATTATGAAGTATTTAGATTAACAATCATTTTAACTTGTTAATTTCAAAACTATACCACAGCTAAACTATTGTTTTTTAAAGGAGCTAAACTCATTTTTATAGCTTTCTTTGATGAAAATGTGATATAAATTTGCACTCTCTACTCTCTAGGAATCCTATGCAGCATATGTGCACATGTTGCAGCCGTAGTTGGATGGATCCAATATGCATTTAGTGGTGTATTAGATTTAGATTTTAAGAGACTCCATTTCAGATGAGTTTAATTTATTTTAAATATAAAATGCTTATACGGAAATTGATCGCATATTTATCAACATAACAATCAAATGAGTTAAA…
MsMYB113	MSAD_268202.t1	Medtr4g073420.1	At4g38620	At5g01360	PubMedID:27117388	MSAD_224565.t1	Medtr4g016940.1		√			√	√		√				√	√		√		AATAATATATATTAATCTCTTGTCTCGTGTATAATAATTATTTTATAATATATATTAGTGATGACAAATCATAATACTTATGTCCCCGTGAGCTTAGCTCAGTTGGTTTGGATAATGCTTAATATATCCAAGGTCCGGGGTTCAAACTCCGACCACTAACAAAATATGTTCAATACTTATTTTAATTTAAAATTTTGCGAAGTGACAACTTGTCTCGTTTACAACAATTATTTTAAAATTCTGAAGTGATGAGTTGACCTTTGTATAATATATTTTGTCAATCTTTTTTAAAACTTGTCTCTTAAACTATTTATACCTCGTCTGTTACTGCTTCACTTCAAATCTATACACATCACTGGGTAACATTTGGGTGACATAGAGTTTGGTGACATTGGCCAA…
MsMYB113	MSAD_268202.t1	Medtr4g073420.1	At4g38620	At5g02240	PubMedID:27117388	MSAD_264846.t1	Medtr4g021815.1	√			√			√					√					TTGGACTAGCTTATAAGCTTGCTTTGATAAAATGAGATGTGTTTGGTAAAAAGCTTTTCTCACTAGCTTATAGCGTTTTTTAAGAAGCTAATCCAAGTAGTTTTTTAGCTTATAGCTTGTAGCTTTTTATACTTTCTTCCCATTCTAACCTTTTCTTAATTTTATTATAATAAAAAAAAAACTACCCACTATCTTCTTAAACTAACCACGTTTACCATATATGACTTTTTAAATTTTCTTGTCCACTTTTTTGTTTTTTTTTACTTTGCTCATAATTCATATAATATATAATTTTATATAAAATTTATAATAAATAGTGAAGCAATTAAATAAATATCATAAAAATAAAATAAAAATTGTAAAATAAAAAATTCGATTGAATTCATAAATACATTTATT…
MsMYB113	MSAD_268202.t1	Medtr4g073420.1	At4g38620	At4g31500	PubMedID:27117388	MSAD_316759.t1	Medtr4g026050.1	√		√	√			√	√			√	√		√			TATAAATAAAAAGAGCATTTAAGTCCTCAAAAAACATTTCAATAAGTGTAAAAATTAATCATTTGAATATTGTTTTGCAAATTACTTAAATAAAAAAAAATCTTTGTGCACAATTATTTTAATGTAGAAAATATAACAACATATTATACCTTAAAAAAAAATTGTTGTGCACAATTATTTTAACGATTTATTATTATTATTTTTATTTAAGTAATGTGCAAAACAATATTCATGCTTAATTTTTACACTGATTTAAAGGCTATTCTTAATAAGATATATACACATAAGTATAATACTGCAATTGTTTGAAACGTACCAAAATAATGATTGAAACATTCAAAATCAATAAATATTATTAATGACAATTTATAGTTTTTGTCAAAAAAAAAAAAGGTTTGA…
MsMYB113	MSAD_268202.t1	Medtr4g073420.1	At4g38620	At3g49170	PubMedID:27117388	MSAD_231479.t1	Medtr4g031160.1				√	√	√	√	√	√								CATCAACTACAAAAATTCTACATTTTGTCCTTCTTATGCACATACTTACACACAAATCTGATTTATTATCGTATTGTTTTCAGGCTCAAGTCCCACAATTTTCAAGCCCAGTCGGGTTGAATAATATTACACTCGGTGAAGAACAACAATCAACTCAAAAAAGGAAAAGAACAAGGTTTACCCCTGGAGAAGATAAAGTTCTCATCCAAGCATGGCTCATCGTTCCCAAGAATGCAGCTGCGGAGGCAAATCAAAGAGTAGATTCCTTTTGGCTAAGAATTAAGAATACTTACAATGAGCATCGCGGCCATTTCAAACCGAGGGGAGTATCACAAATAAAATCGCGATGGCATAAGTTGAATAGCATAGTTCATAAATTTGTAGGGTGCTACAAAGTAG…
MsMYB113	MSAD_268202.t1	Medtr4g073420.1	At4g38620	At3g63440	PubMedID:27117388	MSAD_291303.t1	Medtr4g044110.1			√				√	√					√				TACATTATATTATATAAAGATCAAATTAAATACAAAATTTACTTAATCCAGAGACCAAGACTGATTATGAGTTGATCTTGACCCAACACAACATCATAAAACCTCGCCCAGACCAACATAATATTATCTAAGAGCAGGGCCGTCTCTATGGAACTAGAGACCCGACTCTCAAAGTAAATACATTTCTAGAAGAAGAAAAAAACAAATTAAAATGTTTTTTAAAGAGGAAAAAAATGTTTATAATATTTTTTTTTGAGAGAATAATTATAATGTTTGTTATTAGAGATTTGCTATTTTATACCATAAGTCTTGACGCTACTTTGTTGTCTTTCGAGATTTTTCATGGGATTTATATATATGTTGCATGCTTTCTTTCGTTTGTTTTATTTGTTTATTTAT…
MsMYB113	MSAD_268202.t1	Medtr4g073420.1	At4g38620	At2g27820	PubMedID:27117388	MSAD_283733.t1	Medtr4g055310.1			√			√			√	√	√	√					ATACAAAACTTTATTCAAATTTATTCAATACGCAACTTTATTTAAATTTATTCAATACGCAACTTTAATCAAAGTACCAAAATATATACCAAAATGCGCAGCATATCAAAAAACATAAAAAAAAAACAAGACATTACAAGCAATTACATTTAATCATCTCCCTCGTCGCTTAAGTGGCTTAAGTGAATTGGATTGTCCCAGATAGTGCCTGGGGCACCTGCTTTTTGGTTGATGACCAGTGGCGGAGCCCTTCATGGGCTGGGGTGGGCCACGGCCCACCCCCGGGAAAATTAAAAAATTAACGATTATAGGTCTATTTTGCGAGATTTTATGCAATTTTGTGTCGATTTTATGTTTTGGTTATCCAAATTCCTGCAAAGTGGTGTAGTGGCTCACCCG…
MsMYB113	MSAD_268202.t1	Medtr4g073420.1	At4g38620	At2g28315	PubMedID:27117388	MSAD_282277.t1	Medtr4g058860.2	√				√												TATTTTTTATCTAAAAAAAGTCAACCAAATTCAAAATAGAAGGAGTCTGAACAAGTTAATAGATAGACTCGTGATTTCATAAGATTGATTCAAAATATCATGTTTTTATGGTGAAAATGGGGTATAAAAAGGTTTAGATTTAATTTGTTTTAAAAATTAAATGACTTAAATTGAAATGAGGATTGAATTGAAAGAACTTGAATGCAAAAAGATTTTAATTTAAAAGATACAAACATAAATGACTTCAAAGTTAAATTGGAAACGACTTCAAAAATAAATTTGCAAGAAAATAAAATAATGTAAACACAATGTTTTGAATTGAAAAGTCGATGAGAAAGTAAATTGTTTTGTAGTACAATTATATAGGAATTGAAAATCTCTCATTTTTTTTTCTTCTAT…
MsMYB113	MSAD_268202.t1	Medtr4g073420.1	At4g38620	At1g10850	PubMedID:27117388	MSAD_331741.t1	Medtr4g074080.1			√	√			√	√				√			√		TGTTGAACTATTAATATACCGTATTTTCTGTAGTTGGTTGAATTAATTTGGGTTAACATGCACTCCATCCATCTTTCTTTATCATGTTGAACTATCGATTCGTACAAGAATTTGTTCTAGTTCTCTTTCTGTATCATTGCCTTTGCACTATGCCTTCTGACCAGTTTGATAAAGAAGACCTTGCAAGTTTTGTTTCTCGATGCATATTTGAATTCTTTAATATCAACAGGTTAAAAAGGCAGTGAAATTCTTTGCTAGGGAAAAAGAATACTGGGATAGGATCGACAAATTGGAAAGAGAATGTTTAGAGGCTGAGTGAGATCAAGGATGTCAAAATGGTCAATTGATGGGTCTTTTTGCCATTGGTCTTTACACTTGAGCCCCCACCTTGAACCTCCG…
MsMYB113	MSAD_268202.t1	Medtr4g073420.1	At4g38620	At5g04590	PubMedID:27117388	MSAD_243163.t1	Medtr4g077190.1		√				√	√	√			√						TGAATTGATGGTTCTCATGTCTGGTCTTCTTCCTAATCCAGTAATAGAAACTTCAGTGCTTTCAATATGGTTAGTAATATATCTCAAGCTCAAATATTGACAACATTCTTCAATGCACATTAAAGTGTCTAATTGTGGATGTAAAACTAAAAATCATTTATTTGCAGCCTTAATACATTTGGTCTAGCTTGGATGATCCCTTTTGGGTGCAGTTGTGCTGTCAGGTATTTTACAGTCACTTGCTGGAATTATTTTTCCTTTTTTAATTACATACTTGAGCTTATTTATCTCTGAAAGTTAATAAAAATCAAAAGCACACTGCAATGCAAATGTTGTGTAGTTTAATATTAGTTTTGATGGATTTGTTTGATAGCATACGGGTGTCGAATGAACTGGGAG…
MsMYB113	MSAD_268202.t1	Medtr4g073420.1	At4g38620	At3g03120	PubMedID:27117388	MSAD_243147.t1	Medtr4g077640.1				√		√	√	√	√			√		√			AATACCCCTCCTCCTCTCAAAAAAACAAAAATGGGTTTCTAAAATTCTTTTTTTTTTTTTTTTTTGTGTTTGTCAAGTACAATGAAACTAGAAATGATTTGGCTTCTCTAAAGTGAAAGGAAAGATTGGGGATTATTGTTATTTATCAGAAGATCAACGGTTAAGATTTAAATAACTTCATAGTTTGTCAAGAATGTGCAATGCATATTATTATAATCTGAACTGTTGATTTTTCAATTAATAGCTATACTCCCCACTTTTCCCTCTTAAGTAGAGCCCCTTACTTTAGAAGAGGGGTAAATCCTAATAGAAACAATTCAAAAGTTTCCTCCCCGAAGAAGGACCATTTTGTTGTATTCAATTAATAACAACAAAACAAATGATGGATGAACATACCTT…
MsMYB113	MSAD_268202.t1	Medtr4g073420.1	At4g38620	At4g18340	PubMedID:27117388	MSAD_305020.t1	Medtr4g084480.2	√	√	√	√			√	√									AGTTGTATATAGTTTTTATTTTTTAACAGTTGTAAATAGTTGTTTTTGAATTTAGAAAAGTATCTTAAAAGAGATTATACAACTGCAGAGCTTATCGGGTTAACTCACGATTAGAGTGTTCTGTTCAAGATATTTCACGACATTATTTAGAGTTATGCAAGATAGACTATCAACCGATCCGTCTCCATGATAAAATAGCTCAGTTTAAATTGTCGATTACCTACCATAGTGTGGATAATCGTTCGAGTGTCAACACCCTCAATATAGTATAAATACCATTCTAATATGGTATGAATGTCACTCGAAACCAAAGGGGCGGAAGGAGAAGGTGAAGAGAAGAAAGTTTGGTTCAGTCAAGTGGAAAAAAGGGAGGGAGAAGAAAATGATTCGAAGTTGGTG…
MsMYB113	MSAD_268202.t1	Medtr4g073420.1	At4g38620	At2g15760	PubMedID:27117388	MSAD_276743.t1	Medtr4g086620.1				√	√	√	√	√			√	√					ATGTATGACTGTCTTCCAAAATCAAATAGGAAGTTATCATTGTTGTGTAAGCTATCCATCAATATTATAAGAAATGTGTCTCTTGAGGTAAGGAGTTTTTGTGTTATTTGGTTTGCTGTTGCTGTGCTGTGAGGGCAGTCAGGGTGCGAAAATCCTGCTGGTGTGTGGCTGGTTTTTTGTTTTTTCAAGAGGAGTTCCTTTGCATCAGTACTGGGAGGTATAGAGGTGGAGTTTTTGGTGTGGCTGGCTCGGCTAATATGCTGTTAGCAGCAGTGCAGTGTTCGTCTTTTTTTCATCTTGTTTTCGGTTTGGAGTAGTGAGGCACGGGTATGCTTACGTATCCGGATGTTGCCGGGTTGCTACCCGTATGTATATTTTGTCCTCATTATTATCTAGGAG…
MsMYB113	MSAD_268202.t1	Medtr4g073420.1	At4g38620	At1g49580	PubMedID:27117388	MSAD_235025.t1	Medtr4g086660.1			√			√						√		√			TCTTTCTTCTCCTTCAGATCTAGCTTTAATTTTGAATTATAACTTTTATTATTTTCTGTATGCCCCATTTAATTTTTAACAAGAGGGGAATTTTGAAGATAGAGAGCACCACTCACTTATGACCCATGGGTTTGCAACTTTTAAAGAGGTGGAAGAATAATCCTTCATGTTGACGAGAGTGAATAAAGAAAAGATGTGGTTTGTTTGATTTGTGTTGTAGAGATGACATGGCAAAGTGAAGAATCTTGGCTTAATTGGCCTATGCAATTTCGTATGTTAATACTCCCTTCAAGAGATGAAGAAATCCGCAGGAAATTCTTCAACGAATTTTCTAATTTACAACTTCTACTGCCGGATTACCTATCTTTAATTTGCCGGAAATTTAATGGATTTCACCAT…
MsMYB113	MSAD_268202.t1	Medtr4g073420.1	At4g38620	At5g64460	PubMedID:27117388	MSAD_310647.t1	Medtr4g092840.2					√		√	√	√			√					CATGCAAAGTTTAAAAGATCATGAGTTTAAAAAGGAAAAAAAAAAAGCCACACGGTCTAATATTTTCCGAAAACTAAATGTGTCCTACTAAATTGTGGGGATCTTATATAAATTTATTTTATTATAAAGTTAAGAGGAACAAAGGGAGATAAGGAAATAAAATAAAAAAAAAAAAAAGATATATGCGGAATCAAGGTCCCGTTTTCTACAACTATATACCCATTTATTTTACACTGGTGTGATGTTATCTTTACAATTTTAATTCAAGATTTTACAATTGCAATTCACGTCTTGCTCGACTAAGAAGGAGGCTAAGCTACCCATTTGTGAGTATAATTTTTTGAAAACATCAAAATGGAATATATAAACATAGGTAGTGGAACCATTTCAGCACAAGAT…
MsMYB113	MSAD_268202.t1	Medtr4g073420.1	At4g38620	At3g49700	PubMedID:27117388	MSAD_267749.t1	Medtr4g097540.1	√			√	√	√		√		√		√					CGCAAAAAGGGTGTTGAGATATATTCAAGGCACTTTGGACTATGGAATCAAATATGACAGCAAGGTTGAAAGTAAGTTAATTGGCTTTTGCGATAATGACTGGGCAGGTTGTATGGATGACATGAAAAGCACCTCTGGATATGTTTTCTCATTAGGTTCAGGAGCAGTTTCGTGGTGCTCAAAGAAACAACAAACTGTTGCTCAATCTTCTGCAGAAGCTGAATATATTTCAGCTGGCTTAGCTACTCAACAAACAATATGGTTGAAGAGAATACTTGAAGACTTTGGTGAGAAACAAGAAGCTGTGACTATCCATTGTGATAATAAATCAGCCATTGCTATGGCTGAGAATCCCATCTTTGATGGAAGAACAAAGCATATAGCCATCAAACATCATTT…
MsMYB113	MSAD_268202.t1	Medtr4g073420.1	At4g38620	At1g13630	PubMedID:27117388	MSAD_214107.t1	Medtr4g108650.1			√				√				√	√					GAGAAGAAAAAATTGTTTCAACACCACATTTTTTTTTTTTGAAGCAAAGCACCCACTCTTTTAAAATTGACTTTCAAAACAAAACACAAAAAACTCAACCACCCCATGATGAAATTTAGTTTAAAAAGAAAATAATTGTTAAACATCCAAATTTAATCTACCACAAAAGAGAGAAGAAGATCTAAAAAAATATGGTTTTTCTACTACTCCTTTTGTCCCTATATGTAAGTCCCTTTTGTTTTTTCACATTCTTTTAAGAAAAGTTGGTAGTGTAATTAATTTGTCTATTTTGTGTGTTAATATTACTAAATTGTCTTTTGTTTGTGTATTAAATTTGACTTTTCATATTTCAAAACAAATTAGTAGTATTAATTAAGAGTATGTTTAGGAAAAAAATAA…
MsMYB113	MSAD_268202.t1	Medtr4g073420.1	At4g38620	At5g07830	PubMedID:27117388	MSAD_311696.t1	Medtr4g109300.1											√	√					TGCATAATATATACAGGTGTCGAAATTCGAACATTTGACACCTCACTTCTCCATATTTAAAATGCATGAGCTCTAGTCACTAAGCTACTTAGAAAAAATAATATTAAGATTGATATATAACTATCCCAAAATGTGTATATTTGATACATTATACCCTATTGAACCTGAATGTTCTATATCCTTATCCATTTTACTAATGAATCTAAGATTTTAATTATGTGGGAACTCACCTTTAGCAAAGCCATGTTGTATGGTGATTTTAAAAACATGATGTGAAATGTCCAATATTGTATCTACCATCCGGGCCCTTTTCTTTCTATTAAAGGATTTAATTAAAATGATAATTACTATAATGATGGATAATTGAATGATCTAATCTAATTATAATTATCTGTCTTT…
MsMYB113	MSAD_268202.t1	Medtr4g073420.1	At4g38620	At3g25640	PubMedID:27117388	MSAD_227339.t1	Medtr4g112370.1			√		√			√			√	√	√			√	CATAACAGCAACCTAATTAACAAAAAGAGAAAATGAACATACACACAAAATTTAAAAGAAAACTTGGTTAAATAATCTATGATAACAAAAACCAGTAGCGATTGAGAGAGAGGAAGAAAACGAAAGATGAACACTTACACAGCTTTGAAACAGACATCTTCTTTGGGTTTCAAAATGAAAGCGATCGAGAGAGAGAGAGAGATAGAGAGAGAGAGAGAGAGAGAGAGGAAGTGGTTAACGGAGGCGGCGCAAGGAAACTAGGGTTTCCCTTAACTTTACGAACTCTGTTCTCTCTACTCTGTACTCTCTCTTTCTCTCAATGAAATGGATAAGAATGAGTGTGTTTTGATATATAACCCTAGTTTGTTGTCAACGGACTTAATGATTTGGGCTTAAATT…
MsMYB113	MSAD_268202.t1	Medtr4g073420.1	At4g38620	At1g15690	PubMedID:27117388	MSAD_329549.t1	Medtr4g115970.1	√				√											√	GGATCTTCTCTTTTATCTGCAGAAATAAATAATAAAACTTGAAAATATTTGGACTTATATAATGATAGAATCAACTATATATATTTTGAGTCTACCTTTTTTTTAATGACAATCTCCATTTAATTCTATAATTGGAGAGGATCCTTGTTCCACAATTTCACGGTGATTACTATGTTCCTCATTCTGTCGACTAAATGCCATAGGGGTTCCTCAAGTTGTCAAGTTGCTGAACCATTGAATTGTAAACCCAGTTAATTTTGTACAATTGGGATCTATCATCGAAATACTCCATCCATCATAAATTATAAGCAAAAAAATATCATTTTCTTTATCCAAAAATATAAACAAAAAAGACCAACTTTTATATTTATTTCAAAAAAATTATCTTTTTCAAAGTAA…
MsMYB113	MSAD_268202.t1	Medtr4g073420.1	At4g38620	At1g14890	PubMedID:27117388	MSAD_234104.t1	Medtr4g120830.1		√	√				√	√				√	√				GAATTTATCTACTTTTTATTTGATTTTACAAAAAAATAGATTTTTTTTAATATATGACGAATTAAATATGAATTTTTACGCCAAAATTTTAAGACAAAAGAAATGAAAATTTAAATCTTAAAATCAAATTTTGAACTATTTTTTTCATATGAACTTCTTATAATCTTCTAAACAAGCATGAAAAAAAGTGAGAATAATGCATCACTTTTGTTAAAAAAAAAAGTATGAAAAAGTTCATAAGTTAAACATACAAGAATAATTAAACAAATTTAAATTTAAGTGCGACTAAAATTGCAAGCACCTTCAGCTCTCTTTGGCCGTTAGTGCGGCATTTGATTGGTTTTGCGGGCGCGGATTCTCGAGTTTTTCCATATCATTTTACCTAATTTATTCATTCAA…
MsMYB113	MSAD_268202.t1	Medtr4g073420.1	At4g38620	At5g20700	PubMedID:27117388	MSAD_280620.t1	Medtr4g124930.1		√	√				√					√	√				AATGAAGAGAGACATTTTTTAACACAAATAACTTACATTTTATAAATGAAAAAACCATCTCCTGTCAAAAAAAAAATTATAAATGAAAAAAAAAAACATTTATGGGCCCTCTTATCCACCGAAGTGTTCCCTTAACAGCCCAGTTTCTGCATGTAGCCTTCGCTCGTATGAAAATTGCTTTTAAACACCTTGGATTACTCACAAACACCTAAAACTTTCAAAAATATCATCACTAGGAGTTACGAACCGTTCACCTGTGAACGGTAGCCAGGGATTGTTCGAGATTTTGTCAATGGTAGTTAGGAACCGTTTTCAATATACCTTTGCAGGTAAATTATGTTATGCCTGGATGAAGTTATTGATATGCTTAAAATAGCTCATGAAATATGCTTTTTAAGC…
MsMYB113	MSAD_268202.t1	Medtr4g073420.1	At4g38620	At1g12000	PubMedID:27117388	MSAD_317475.t1	Medtr4g132700.1		√	√	√	√		√	√				√	√		√		TATTTTAACCATGATGCTAAATTCCTTTGTTTAACCTTATTAGAAACTCAAGAAATGAACTGATAGAAGTAGTCAAGGATTGTGTGTAGTGCTGTTAAATTTGAGAGTTTGTATGGCTAAAATATGTAGTTTATACCTTGAGAATAAGAAACAGAAAAATTGTACTTGATATAAATAAATTTAGTGAGGCTCAATCGTTTTTCTTTATCTTATGATCAATAATAGTCTTTTTTCTTAAATATCTTAGTAAGTATTTTGTTTGGTTGTAACTAAAGTATTTGTTTTGATTCAAATTATTATTATCATGTCATTGAACATGAGTGTATTTGTTTTGATTCAAATTATTATTATCATGTCATTGAACATGAGTTTTTATTATGTTGTTTATTGTTTATTCTT…
MsMYB113	MSAD_268202.t1	Medtr4g073420.1	At4g38620	At5g16730	PubMedID:27117388	MSAD_243111.t1	Medtr4g478190.1			√	√			√	√		√		√			√		TTTTTGTTGATAAAATTGATACATCTTAATTTAAACATAGATTTTCACCGAGTTATATTACTCTAGGAGGAAAAGGTGGCAAATATGGCTTTCACTCCTTCACAATATTGCATTCTGCCAATTCACGCTATCAATTCAGTAACTATAAATAATTTATATAGCAAAAAAAACTAAAAATCATTTAACCTTAATCACAGAACCCAGCATTTCACATAGTATGGATTTAATCCTCCAGACAGGACACAAAAAAAGAAAGAAAGATCTGTAGTCAGTAAATGTACCAAATCAAGTTGAGCTAGGGTCTTTTGCACCAGAGTGAGTCCACCAGGGTATTCCCTCAACTTCGGCTATGAAATTAATCTCTAATTCGTTTGATTGAATATGGTTTTATCCTTTTAT…
MsMYB113	MSAD_268202.t1	Medtr4g073420.1	At4g38620	At3g03150	PubMedID:27117388	MSAD_210561.t1	Medtr5g008210.2				√			√	√				√					ATACTATTTAACCATTCTTAATATCATTGGCCTTAAAGAGAACATGATTAGAAAGGTTGAAATTGAAAGGGACATTGCTTGTTTGTTGCTACATGGTTGCTAATAAACTATGGATGTTTCATGGACAATAGTCAAAAAAGAACAGAGGAGATATATTGTTATGACGTATTGGACATTTTTATTATATATTCGTGCAACGTGTGAATTAATTTCAATTATCTTTTATTCAAGTAAATAACTTCATTTATAATATTAATATCTTTATCAAAAAATAAACTTCATATATAAAATTCTCTTCATTAGAGGACAATGTGCCTTCCATACATACAGTTCGTCAAAAATTGCAACCAAATTTCTTAATAATAAATAACGAGAAAATGAAAGCATTCCTTCCACTGT…
MsMYB113	MSAD_268202.t1	Medtr4g073420.1	At4g38620	At1g71450	PubMedID:27117388	MSAD_315254.t1	Medtr5g008590.1							√			√							TTCTTCCTCACTATCTCATTCTTCTATCATCATTTTTCCAGATTTTTTTTTTCTTACTCTCTTACTCCACCTCCCTTCAATCTCTTTGCTTCCATGAGACTTAAACTCCAAATCAATTAAACACACAACAACAACACAACAAAGTCAGCATAACAAAACACAATACAACATCTTTTTCCGATAAAAAAAAAACTCACAACAAATCCTCCTTTCTCTCAAATCAAAGCAGCAGCAACAACCCACATTAAACACAACAACAACAATGCGAGCATCAAACCCAGAAAATAAATCAGCTTGAATCCAACCTTCTTCTGTTCGAATTCTGTTCCAATCAGCTTGAATCAATCCCAAAAAGAGAAGGTGGGAGATAACAGAAGGAAGAACATAAACATAGAAGAG…
MsMYB113	MSAD_268202.t1	Medtr4g073420.1	At4g38620	At1g12570	PubMedID:27117388	MSAD_308849.t1	Medtr5g011010.1		√	√	√			√					√					AGGGATTAAAAAATATATTTAATCATTTAATAATAATCGAATACTTTAAGTACATATTGCCATTTCTTTAAATCATTTGACTCGTGTCCTCGTAAATATAGCTCAGTTGGTATAGACAATGCATAAAATATGCAAGGTTTAGGGTTCAAATCCCGACAACTATAAAAAAAAAAAAAAAAATCATTTGACTTGTAATTTTCACTAAGGAAACATCTAGCAACGTATTCATCAAGCTATCATGAGCCAAATGAAGAGCACATAGACCACATATTTTGAGAAATGGTTGCACGTCTTTGAGCATCTTGAAGCCTACTTTAGATTATATCAAATCAGTGTTATCGACAAAATTAATTAATTTATTGTTCACATGTGTAAGACTTTAAATAACAAACGTGATTC…
MsMYB113	MSAD_268202.t1	Medtr4g073420.1	At4g38620	At1g12460	PubMedID:27117388	MSAD_210743.t1	Medtr5g011410.1			√	√		√		√				√		√			TACTTCTCATTCAACAGAACATACAGACAGCTTTATTTTCAGCTACACAAACAAAGAAGGTTTGTTCTTCATTTTCCATCTTCTGTCTAGTTCTTTCGCTAAAAGTTTATTTTAATCTAATCTCAATTTATAAGAATTTTAATATAAGTTTTTTTGTTTAATTTGAAAATCATGGCCTGCCCATTATTTTTGTGAAATTACTATTATACCCTTGACCTTATTTAAAAACTACAGACATGCCACTCAATTTTCTTTTCTGAAACATTAAAAGCGATATCATTTTCTCCTCCTCTAGCCATTGCAGTACAACCTCCGTCCATCTCCTACCGTCAGCCAGGCCGCGACCGTTGCCTTCTCTAACTCTCCATCGAACTCGAAACCCACACTCATCTCACTCGT…
MsMYB113	MSAD_268202.t1	Medtr4g073420.1	At4g38620	At4g17480	PubMedID:27117388	MSAD_232397.t1	Medtr5g013020.1				√			√	√			√						GTATCGTATAATTATTTTTTAAAAAAATAAAATTTAATATTTGGATATTCTTCGGATACGTATCGAGAAGTATTGGGCAGATATCGGTGCAGGATACGCAGGGGATACGGTACGTCATCCATTTTAAAGTATCGGAGCTTCACAGGTTTACTTTGTCTTTGGAGTGTATTTAATAGGAAAGTTTAGCCTGTTTTTTTTTTTCTAGCTTGTGGCTGCATAGGTTTTATGTGGGGTAATATTACACGAGGATGTTATAATGATTTGGAGCGAAATCCTAATGACTCTTTTTTTCAATTTCTTAGCATATTTTGGTATCTTGTTTGAATTGGGGGCTATTAGTGGTTTATTGGTGTTCGAGTTTTTATATTCTTATAGAAGTTCTATGGCTTTCTTGTTGTT…
MsMYB113	MSAD_268202.t1	Medtr4g073420.1	At4g38620	At2g38740	PubMedID:27117388	MSAD_277869.t1	Medtr5g013910.1				√				√			√					√	TCCAAACATACCCATTATATCAAATGAAAATAAAAGAGTAAAATTCAAAAAGAAAAGACATCAAAGTGAATTAAAATTACCAATGCCTCTTCCTCTGTAGGGTTTGATAACAACAAGCATAGCAATGTATCCTCTAAAAGTGCTACGATGTTCCCCCATTTTACAAACCACCGTGCCCACACATTTACCCTTATGAAAAGCCTGAAAAAAACAAAGAAAGAAGAAAACACAAATGTTAATAAATCAAAGTGATTAACGGTGAATTGAAAAATTACCCAGATAATAAAAAGGTAAAAAGAGGAAAGATTTAGCACCAGAAAAGAAAGATGAGGCCATAGATAAACGAAGTAGCGATAGGTGAAGATGGAGTAAGGTTCGCTGAGTTCTTCGTCGACAAGG…
MsMYB113	MSAD_268202.t1	Medtr4g073420.1	At4g38620	At5g67530	PubMedID:27117388	MSAD_277991.t1	Medtr5g015500.1		√					√					√					ATAATATGGGAGGGAGTAATGATGATTAATGATACCCACATGATGAAATTTGTTTAAACAAATGACAAAAGAAAAAGATGATTAGCAAAGGTTGGTTGGAAAGCCACGCTGTGTTAGGCTTTTTCCTATGCTTGAATGTCCCACCATCACACCTCATAACTCCTTTTTCTCATGTGAAATGGACCATAGTCTAAAAAATGTAGCAGAGGCCTCAACCGTCCCACAATTAGAAAATGTTGCATTTCCTGCCAATTCAGTCACACATTTGTGGCAGCCATACATTTCAGATCATACATCAAATCATAAGATTGACGTTTCAATTTTGTAAATACAATTTAAAACATCATGTTAAACTATAAATTACTGGATTGAATCTTCTGAATTGCTTAGAAACAGAAA…
MsMYB113	MSAD_268202.t1	Medtr4g073420.1	At4g38620	At2g23380	PubMedID:27117388	MSAD_331388.t1	Medtr5g016870.1							√								√		TACAAGAGATGGATAAATTTATTTGTGATAGCCAAACAAAGTGTAAAAAAGATTCAACTTATATCATAAAAATAAAAAAATTATAAATACAATAGTTTAAATGATGGATAAAATTGAAAGGAAAAAACTATACTAAGGGAGGTTTATTGGATTAGGATTTTAAAAGATTATTTTAATAAAAAAAGTCTTTAAGATTTTAAAAGACTGTGTGAGATTGTATTGATTCTGTGAGATTTTAATAGACTTTTTTATGTAAAAGACTTTATACACTCAAGATTTTAAAGGATTTATCACACAGACTTTTAAGGATTTCAACGGATTTCATGTGATTTTAAAATTTCAAAAGATTCAATAAATTTTAGGGGAAAAAGAGCAAACTTACAAGCGTGAATGATAAAA…
MsMYB113	MSAD_268202.t1	Medtr4g073420.1	At4g38620	At5g66580	PubMedID:27117388	MSAD_255762.t1	Medtr5g018720.1	√						√	√			√	√			√		TCATCATTAAAAGAGGGGAAAAGGGGCAAAAGATGAGGTGCAAAATCGCTCAAAAAAAAGAAGTGGGGGTGCAAAATCGCACAGTTAGCAAAAAGATAGGGGGCAAAAGTGCAATTGAACACAAAGATAGGGTGCAAAATCGCTAAAAAAAAGACGGGGTATAAAATTGCACAATTGACAAAAGATAGGAGGAAAAGTGCAATTAAGCCTTTTCGTTATTGATGACTTGCATATATAATAGTACATCATATGTTAAGTACATTTTTTTTAAGAGATAATTTAAGTATTGTTAAAGAACTAAATATTATAGGATCAAATGTACGGAAAATGAATTTTGTATAGACATAACTGAATTTCGTTATTCCGTATAAAATGACATATTTTAATCCTTGCAAAGGA…
MsMYB113	MSAD_268202.t1	Medtr4g073420.1	At4g38620	At2g18550	PubMedID:27117388	MSAD_265548.t1	Medtr5g019650.1				√			√	√				√		√			AACACACACGTACGAATAAGAAGAAAAAAACAAGAGATCTAACTACAGTGATAAAATAGTATTTTGCACTTAATTGAACTCGGGACAAAACTTTGTCCACTGCTTTGGTGCGGTACAATAAAACGGTGGTTGTCCAGTCCCTCGCTTCTTATTTTGTGCTGTCCATTGTTGCCTTTTTTAAATCAAACGATGGGCAAATATATTTGTATTGTCCTGTGCTGCAATTTTAAACAAATCAAACGCACCTTTAAGAGCACAAATTAACGTAATTAAAAAAAATTATCATCAGCAATAATAGTGAGTGTTAGTGAGTTCAATATTCCCTAAGAATCCACATTTGGATATCCGTTGGCAAGACAGTGTTGCTCAGGCACATATCTAAAAAATATCCTACCTATA…
MsMYB113	MSAD_268202.t1	Medtr4g073420.1	At4g38620	At4g35840	PubMedID:27117388	MSAD_282376.t1	Medtr5g022920.1					√		√	√			√						TTAGGAAACAAGTCTTCAATATTTAAAGAGTTTACCACATTATTGCACCATTTACTTCATATATCTCCTGCATTTATCTATTTATTCACAACAAAGGAAAATGTAGTAAAATACAAATAAAACTTAACTAAAAATATTACTTTTTTAAATAAAACATAACTAAAATTAATAAATTATTGACTATTGAGTTATGATTTGCATAGGCTAACATCTAATGCGTGGTTAAGAGTGTAATGAGTTGATTTGATTTAATTTTTGCAATTTTTTCATCTGAAAGGCTGAAAACTAAACCAAACCGATTAGGAACTGTACTTTGTTTAGTTTGATTTTTTTTTTTTTTTGGTAAGGGTTTAGTTTGATTCAATCTGATTAACATTTTTTAAAACATAACTAAAATAA…
MsMYB113	MSAD_268202.t1	Medtr4g073420.1	At4g38620	At1g26480	PubMedID:27117388	MSAD_318210.t1	Medtr5g044160.1	√						√	√									TAAGCCAAATTTTATTGCTAAAACTCAACGAAATATAGGCCATCATGGTGGAATTATAGTGTACCATAACGTGCCGACACCTGCTAGTTTCCTCAATTAATTATCTCCTGCAAAAAAGTAGAATATATTCCTACAAAAATAAGTTTTTAAACGGTAGTACTAATTTTCAATGTTTGTACCAAAAAAAAAAAAATCAATGAAACTTTTTACTTTATGTATTTTAGCTAAAAGTCAATCAACAACTATATATTTTCACAAATAAAAAAATAATTAAATATCGATTGATCTAATTGATAAAGATTCAACATATATTTTGTAAAGAATGTGAGTTTAAATTCAACACATAATTTAGTGGTTTGGGTTGGAACGATGACTATTATATGAAAAAACATCTGATAT…
MsMYB113	MSAD_268202.t1	Medtr4g073420.1	At4g38620	At1g77660	PubMedID:27117388	MSAD_218728.t1	Medtr5g058920.1	√			√			√		√			√		√	√		CGGTTATTGAAGTCTTCGGCAGTTAACTGTCAAGGGGGCAAAAACTTATTTTACTTGTGTGTCTCAGCCTTATGAAATGTGCCAACAACAAATCTCTTGAAACCTAGTAGTAAGACAAAAGAGAGAGAGTGTAAAGTAAATTGTGTATTGTGGCCTTGTGGGTATAAATAGAGAGTGAGGGACGCGTGAGTTTTAATTGTCGTTCCAAAATTATCGTCCGATATACTCTGGCCCAAAATTGGTGCAGAATATCTCGTTAATTATCACCGTCTTATCATTTCAATTTATGATTATAATTTTTTTTTTGACAAAAACAAAACGATATTCATTCATTCAAATCGATAGAGTATACAAACATCGCTAAAAACCTAAAGGGTGAATCTGCGAACAAACTCACAG…
MsMYB113	MSAD_268202.t1	Medtr4g073420.1	At4g38620	At4g39980	PubMedID:27117388	MSAD_247083.t1	Medtr5g064500.1	√	√	√				√	√							√		TTATTCATAAGATCCTAATTAATAATCCATTCCATTAATTGAATCCCATGCAAAATTAGTTTTTTTCTGTCTGCATGTAATGTATCCAGGCCACGCAGAACCATTAATTGCTAACACTTTAAGAAACTATAACTAAGATTACCATGACCACACACACACGACACGCAAACATGCACAACCATAAATCCACTTTTGGAATTTTGAGTTTAGGCTCAATGTGGACATATGTGATGTGAGGTAAGTTTAGCCCTATTTGTTTACTTCGTGTGCACTATGTTCATCTCTTTCCACTTCTTTACGTAATGGCCACTTACCATTTGAAGCAATAATTAATGTTTTAATATATATACACTTAACGATATCTTAGTAAAGACTTGTGAGCTTAACTCAGTTGGTATG…
MsMYB113	MSAD_268202.t1	Medtr4g073420.1	At4g38620	At3g52930	PubMedID:27117388	MSAD_262325.t1	Medtr5g069055.1			√	√								√	√				GGATTAAAACATGTCACTTTTTTTATGAGGATTAAAAACGAAATTCATTATATATTTACAGGGACTAAAAACTTATTTATCGCAAAAAGACCATAATCAGTCCAAACTTAAGAACAAAAAAGGCTTCTAGAAATAAGTTTTGATATAAATTAGTCATCTAATTGTCGATATTATATAAAATTTAACCTCTACAAGTTGAAGTTGAATTCCTCTAAACAAATGTAAATTATGTTGAATTTTTTACTTTGTTTCGACATGTTTGAAATAATCTGTATACTTTCCTCCAAAAGTTACATCATAAAAAACGAAACCCATTTTACCAAGTATGCAACGACCATTATTTTTTGGTTGCTTACAATACAAGTATTTTTTTAACCTTGAGATTTGCTTCCCTTCTTG…
MsMYB113	MSAD_268202.t1	Medtr4g073420.1	At4g38620	At5g03140	PubMedID:27117388	MSAD_267200.t1	Medtr5g077100.1		√		√		√		√				√					CGTCGTCATAGTGCGATGTTGTTTTGTCTGTCGTCTTTTTGCGACGTTGATTGTCTTTCTTGTTTCGTTCAGGTATTTGTTTGGTTCAAATTGTCAGATCAGCTTCGATCCAGTGCAGATCAAATCAATGATTTTGAAGTCGTCAACGTTGAAGATCCAGAGACATGAATGTTCCGTAGACTTACATATAGTCATATGTGTATGCTTTAATACTTTGTCGTTTTATATGAATGAATATCATTTATTTTTGTCAAATAAAAACTTAATATTACTTATTTCCAGAAACTTAATATTACTTTGTTCATATTTGAATCCAGAAACTTAAACTTCTTTCCCATTAACTCAAATTAGTTGAATTATCCGACCATTAATAAAATTTATAAATTCATTGATACAAAC…
MsMYB113	MSAD_268202.t1	Medtr4g073420.1	At4g38620	At2g30130	PubMedID:27117388	MSAD_276288.t1	Medtr5g083230.1			√	√			√		√		√					√	ATTTTTTTTTTTTTTGAGCAAGTTTTTTTCAAAAAACTTAATTAAATCTTCGAAAATCATAATTAAATTTTTTGAAAACAAGTTTATTTCAAAAAGTTTATTTATATTTTTTAAAATTTTGGAAAATTAATTTCCATATTTTTAAATTAATTTTTTATTTTTATATGTTTATTTTAATTTCGAAATATATTTTTTGTTTTTAAAAAATGGTTTTAAAATAATAAAATTACAAAATCTAGTGATGAGGGAGTATGGTAAGGATGTGTTCTTGGTTTGATCTAATGGTTAAAAACTAACTTTCCCATGGTGGGAAAAATTAGCCTTTCCCATGCTAAACTTCACCTTCAATCTATCCTTACCTACTTTATGAGTTTTTCACTCTCCCTCTATCTTTTTGTG…
MsMYB113	MSAD_268202.t1	Medtr4g073420.1	At4g38620	At5g23730	PubMedID:27117388	MSAD_246485.t1	Medtr5g085250.3			√	√			√	√				√				√	AAGGACTAATAAGACACTATTAACAAAGTATTTTAATGTCGGAGACTATTTTGACTAGCAAAGTATATAATCAGAGACTATTTTGAAAATTCAATACACTGAGGGACTATTGTAGCTAGTTGTGGCACATTAAGGGACCAAAATGACTATTACTTTTTTTAATTATTAATTATTAATTTTTCCATTTGGCACTTAAAAAATTAATGATAAGAGGAGAAATATCGACAAAATTGATAATTGAAACTCGCAAATCATATTGAAGAATTAATAAAATATGTACTTATGACCGAAAAAACATCAACTTGTTTAGTTAAAAGGGCCACAATTCTCTCCACAAACACAATATCGGGGGACATTTTGAATGGAATCAAAGTGAAATGTCTTGAACAAAGAAATTGA…
MsMYB113	MSAD_268202.t1	Medtr4g073420.1	At4g38620	At2g41170	PubMedID:27117388	MSAD_270250.t1	Medtr5g089110.1					√		√	√					√		√		ATCAAAATAAGTATCCAGAGTTTCAAGTACGGGGCAGCCAGAGAGAAATTCAAGTAATGAATCCACAATGTCTGCCTCAAATTCTACAATGTCTATGTCAAGTTCCACGATGCCTGGGTCGATTTTCAACATCTTGAGCGATGGAAAATGAACTGAAGAATGTTGAATCATCACATGGATTGAACCGATAAGACTGTAATATTTTCAAAAGATAGGTTACATAACATTCTATGTATATTACCTTATAATTTGAGATAAATCAATAAAGCAAGCTTCGACGTATCATCTAAAAGACTAAAGATTCTAAAAACAAATTTTGTGTGTTGATAGTAGCATGAAAATGAAGTTACCTGAGGGAAACAAGATTGGTAGAATGAAAGAATGAATTGGGAAGAAGTA…
MsMYB113	MSAD_268202.t1	Medtr4g073420.1	At4g38620	At3g27570	PubMedID:27117388	MSAD_305778.t1	Medtr6g004780.1	√	√	√				√	√			√		√		√		AAAAAAAACTACTACCAATAAACCTCCACAAATAAAAAATAAAAAAAAAAAGACACCTAAAAAAATCAAAATAATTGGTAGTAATAACTTCAGGGCACTTTTTAGTCAAAAAAAAAAAAACTCCAAGACACTATTTTAGTAAATTTTTTTTTTTGCAGGCACATTGTTTTTTAAAAATTACTCCATTTGGTTCTAAATAAAAGTTTGTTTATTTAGTACTTAAAAATGAAAAAAATCTTTAAAGATATCAAATGTGGGTTAAATTGAATGTATTAAAATTGTTTTCATCTAAAGAAAAGGTGGATTAAATTAATCCTTTTTTTGAATAATTATTAAGAAGTGTTTAGTTTTTTCTAGAATGTTTGATCAATATTTAACATTTATAAAGACCGTCCACGT…
MsMYB113	MSAD_268202.t1	Medtr4g073420.1	At4g38620	At5g15900	PubMedID:27117388	MSAD_275295.t1	Medtr6g016880.1			√	√	√		√			√							TGTTGCCTATACACCAGCTAAGGCGTCAAAGTTGTATGCTGATCGCTAAATATTTCATTTGATTTCATCTATTGTTATGAATATTTGATTTGATTCTATCTTACATTACAACTATTGTTATAAATGAATGAAATAATATAAGTTTATTTTGGTAAAAAAAAAAAAAAAAAGCATACAAATATAAAACATTTTACACATGGATATAATCAAATCATTTTTTTTGTCAAGTAGCCTAATGGCTGGAGCTTCCATATTTTAAATATGGAGAGGTGGAATGTCAGGGGTTCGAATCGCTGACTCTGCATAAATTATACAATGTTCCTCCAATTGAGTTAAGTTCACGGACACATACTCAAATCATTTAACGATGTCATATTTTCATATTAGATTCTAAAATAT…
MsMYB113	MSAD_268202.t1	Medtr4g073420.1	At4g38620	At3g01710	PubMedID:27117388	MSAD_240530.t1	Medtr6g022230.1							√	√			√						ACACCTCAATTTGTGAGGTGTACCGTAGTTCCCAATTTTACATATCAAATGATCATGCCGGCCAAATGGCAAGACTATAACACTAAGTAGGCAGACAAATAAAATAAAATTTTATATGCTTTTAAAAAATACATTTTATGTTTAAAAAAAAAAAATACATGCAGAGAAAAAGGCCCGACATAAATAATCGCAATTATTTACGAAGAAAAGAAACAGTACATGGCGATTAGCATATATAATGACCCAACCTCTCAAAGATTATTAGGCAAATGAGCTTATGTACATAAGTTTGCAGTTTTCAAATATACGGTTCACAATATTAAAAAAAATATTAATAATACCGTAATTATAATTTTGGAGTACATGATTCTCACATAAAGAGTCATGGATTTTTTTAGG…
MsMYB113	MSAD_268202.t1	Medtr4g073420.1	At4g38620	At3g03780	PubMedID:27117388	MSAD_220370.t1	Medtr6g027920.2	√			√			√	√			√	√		√			CAACCGTGCGTATCAAGATTGGTTCTCATCTAGGTTCACAGTTACAACATTTGAAAATGAAATGAAATGGTACACAAATGAATACGCACCAGGAAAAGATAACTATTTCCAAGCTGATCAAATGCTACAGTTTGCAAAATCACACAATATTACTGTTCGAGGACACAATATATTTAATGATGATCCTAAGTATCAACCAAAATGGGTTTATTCACTCTCCCCAAACCAGCTTAATTTAGCAGTCCAAAAAAGAATGAATTCCGTTGTGGGAAGATACAAGGGCCAAGTTATTGGTTGGGATGTTGTTAATGAAAATCTCCATTTCTCATTCTTTGAAGGTAAACTTGGACAAGATTTTTCAGCCAAAGCATTTAACAAGGTTCATAATATTGATCCACA…
MsMYB113	MSAD_268202.t1	Medtr4g073420.1	At4g38620	At2g38905	PubMedID:27117388	MSAD_316722.t1	Medtr6g033495.1			√				√	√				√	√			√	CTCTTCAATTTTTAGAAGTAGATGAATCACAAGAGTGTATTGAGTAAAAATAAAGTCTATCTGAATTGCTTATATTCATATAGTGTGTGTTTGGTTTAGCTTAGATAGAATTGATTCTGAGAGAATTGATTTATGTTTGGATACAATAATGCAGAATTGATTAAACAAACTGAATGTTGTTTGGATAGTTTTATCAAAATTGCTTTTGAATGTATAATTACTAAAATGAACATAGTTAAATAGAAATTACTAAATTAGGATAATTAAGTGCAATATAGTTAAAATATAAGTTATTACAATACTAATAGCATGAAAATAAAAATTACAAATAGATAATAGAATTTAAATTGCAACAAAGTACTAATATTATTACAAAACTAATTTAAAGTGTATTATAGT…
MsMYB113	MSAD_268202.t1	Medtr4g073420.1	At4g38620	At4g09730	PubMedID:27117388	MSAD_213058.t1	Medtr6g039840.1			√		√			√							√		TCTATCTCCTCACTCTAAGTCTCTAGGGTATGTTTTATTTCTTTTGTAATTTGTCTTTAGTTACCATGAGTAACTAAACCCTATTAGGGTGGGGTTCTAAGATGAACTTCTATTTTATTTGTTGGATTATTTAATTTAAGTTCTTTATTCAAATATTTTATGAATTCTTTTTTAATTTTATTATGCGAATTATTTATTTCTTCTAAAGTGAACCAACCTTGAGATAAATGTACTTAGTAAATGACATAACTAATATTGGTGTAAACCTACTGGAATCAGGAAGTAACTAAGATAACAAATACGATAATTAGAGAAAAAGTAGTAACAACAAAGAATTAAATTAGCATAATAACTTTATTCTTGTTTCATCCTTGGTAAGGTATACGAGATAGGACTGCC…
MsMYB113	MSAD_268202.t1	Medtr4g073420.1	At4g38620	At3g18200	PubMedID:27117388	MSAD_264399.t1	Medtr6g081840.1	√	√	√			√	√	√				√		√			GATTTAAAACAATGGCGGGGTGGATCGACGTTCATGCGCAATTCAACGGCGGAGAACCTCAGAGGTTTAAGGTTCGGTGCCTTGGTGTAACGTTAAGAGGTCTCAAGGATACACTGACTGAATTCAACCAAGGAGTCAACCCTAGAGACACAAGGATGGTGGAACACATTTGGTATAAACGTCCAACACTCGACGAGGGGAGAGTATCATTCAGTTGGGTGGAATTAACGAACGACGAAAACGTGACGACCATGTTTTGGGAGCACAACATGTTCTAGTGGATCGATATGCGGGTGAAGTTGCTTAGATCAACTGAAGATATCATCAAAAGTTTGATTCCGCCACAAGATCGTCATTAGTTAGGGTAAGGTGCATTCCAACTACAACATTTGTCTTCCT…
MsMYB113	MSAD_268202.t1	Medtr4g073420.1	At4g38620	At5g19560	PubMedID:27117388	MSAD_216905.t1	Medtr6g087700.1			√	√			√	√			√				√		ATAAATTCATCTTATAAATTGGCTATTCAATTTCATAAGAGCATAAAAAATTGATTTCTAAGAGCATAAAAATGTGCCCTTAGGGTAAGAATTAGCTTTACAATTTTTTGTTTTTGCCAGAAATCAAGGTAGTTTCGACACTGGCATTGAGACTTGTCTTGCAATGAAAATGAGTGTCAAAGAGGGTGTTTGTTATTTCTTGTTGCTCGATTATTCTGACATTCCTCACCCTTGACCTGTAAAGGAGCAATCACTATTCCATAAATCAGCCTCTCTATTATTGCAAATAATTAATCACAATAATTTGTATATCAATCATTTATTTTAGTTGATTCATAGAATATGCTTGCCATGATTTGTAATAAGTTGTTATTATGTGTTACCGTACATGACATGATT…
MsMYB113	MSAD_268202.t1	Medtr4g073420.1	At4g38620	At5g56840	PubMedID:27117388	MSAD_232989.t1	Medtr6g092540.1				√			√	√			√			√			TTTAATGGCTTTTGCATTATTTGAGAATGGCCCAAGATTCAAAATGGACCTACTGAATTGTGGTATTGAACAATGAAGGGTTGTGAAGTGATTATGGAGTATAGGATTTTTAGGCTGAGAAGTTATCAAAGCCATGCATAAAAAAATATATCTATATTTTTTTTTTGTACTTGTTTATGGCTAAGCGGCCTAAGCCTTTTTGTGAAACAAGATAGAGGGTTTGAATGTTGAAGGTGATATTGTTTTTTTGGGTTTTTATGTTTATGGTTTATGTTTTATGTGTTGGAATTGATTGTGATGTGGAATAAGCCAAGTAATTTAAGCGGTGGGACAAGTTTGGGAAAATGGGGTTTGAAAACAAATTATGGGGGTGAAGTTGGGAATAGGTGTGGAAAGAGA…
MsMYB113	MSAD_268202.t1	Medtr4g073420.1	At4g38620	At4g31040	PubMedID:27117388	MSAD_232936.t1	Medtr6g093210.1			√		√		√				√			√			TATAAAATTTTCGGTTTGAATTGCATCCTCGTAAAACTTTTTTTTTCCTAGAAAACAACCCTCCCCCATCCAACTCAGCAAATTCGCTTACGTGGCGCTGATTTGGTTTTTTTTTTTTAATTGGCCACGTGTAAAAAATATATCCACATCAGATTTTATTTTTAAAATATTTGAAAATAAATTTTAAAAAATAAAAAAATCCAAAAAATATTCAGTTTGTTTCCAAAAATTAAAAAAATCAAAAATTTATTTTTAAAAAATTCAAAAAAAATATTAAGATTTTTTTCGAAACATAAAAAAACAAAAAAATAGTCATATTTGTTTCCAAAAAATTTTAAAATCGAAAAAAAAATTAGATTTTTCTTTCAACAAAAATTAGAAAAAATCAGAAAATGTAAT…
MsMYB113	MSAD_268202.t1	Medtr4g073420.1	At4g38620	At5g41040	PubMedID:27117388	MSAD_324263.t1	Medtr7g027175.1								√			√	√	√				TGGAAAAAAAATTGAGGGTCTTAAAAGATGCAAAGTCTAAATTAAGACCTCATTCTTAAATGGGCCCACATCACTTTTTTATTAAAATAATAATTAAAAAATGTATTAAAATAGATAGTGTATTAAATATATAATATTGGAGGGACCCAATTAGACCTTTTGGTTAGAGGGTCTCCATTGGAGTGGTTGAGTACCTATTAGGTACTATTATTAAAAAAATATTAAAAACTGATGTGTCAATGTGGGATCCATTTAAGACCTCAGAGATAAGAGTCTCCATTGCGGATGCTCTAAGAAGTTTTATGTTATTAGTCAATCACTATGTCCTCGTGAGTTTAGCTCAGATTGTATGGACAATGCATAATAACATGCAAGGTTCGAGGTTCAAACCCTGACCAC…
MsMYB113	MSAD_268202.t1	Medtr4g073420.1	At4g38620	At3g01620	PubMedID:27117388	MSAD_275884.t1	Medtr7g033325.2			√			√	√	√	√	√	√	√			√		TCAACACAACTTTTTTTTTTTTTTTATATTTGAAATCCGTTTAACTAATTTGTTTAACAAACAACTACTTTTTTAACCTTGATTTAAAATTTTGTAAGATTAGAACGGTTTGAACTAATGCGTGGTCTACATGGTTCGATACAATATTTTTTGATATAAACCAGCAGAATAATGCTTAAGGCCGCGCAAAAGGATAGCAAAATCCTTTTTATCAATTAGCAAAAACAAATTTGTAATTAGGCACAAACTATTTTTCTTATTCACCACATACTAACTAAATAAAAATTAAAGAATTTGTTTGTTCGTAAATATTATTAAATAATATTATAAAAATACATATATCATAATATTAGTACTCCATAATTGATGAATTAATTTAATGCCAAAATTTTAAAAGAA…
MsMYB113	MSAD_268202.t1	Medtr4g073420.1	At4g38620	At3g25110	PubMedID:27117388	MSAD_290991.t1	Medtr7g056233.1			√	√			√										TAATATGTTATTATCCAATTCAACATTGCCACGTCATCAAATGTATTAACAAGAGAACACATCAACAAAATTAAACTAAAAAGTGCATTTGAGCCTATATTTTAAATTAGGTGAAGGAAATGCATGTGTAGTAGATTCATTTAGTTACCATTCCAGCAGTGCATGAATTGAGAAGAATGCAAGCAACAACTGCACCAAGTAACTGTGCAATCCAATACAAAATACTTCTCAAGAAGGTAATGTTTCCTCCAATGAAAGCACCAAATGTGACTGCAGGGTTCACATGTCCACCAGAAATGTTTGCACCAACAGAAACAGCCACAAATAACCCAAATGCATGAGATAATGATGCAACTATGAGACCTTCAGGAGTGGCAGCTCCATTGTTTGTAAGTTTAT…
MsMYB113	MSAD_268202.t1	Medtr4g073420.1	At4g38620	At1g61490	PubMedID:27117388	MSAD_295662.t1	Medtr7g056430.1							√	√		√		√					CTTCCTTTGAATGGGGTAATTCAAACTTGTTAAACGGCAGAACTCCAGCATTCGATGAGCATCTTGAATGATGGTATTCAAGTGTCAAGGAATGTACCTCATTCTTTTGACACTTGAATACCGTCATTTAAAATGCTCATCGAATCCTGGAGTCATGCAGTTTAACAAGTTTGAATTTGCCCCATTCAAGGGTAAGATAATTGTTGCGGTTGGAAGGTACATTCCAGAATGTAATGTAATGATAGGAACATGTATTACTGAGAATTAGCTATATATGTTATTTATTGAATTTTTATTCGAATTTATTCAATACACGATGTCGCAATTTTTATTTGAATTCACGTTGTCGCAATTTTTATTCGAATTCACACTATCGCAATTTTTATTCGAATTCACGTT…
MsMYB113	MSAD_268202.t1	Medtr4g073420.1	At4g38620	At3g24650	PubMedID:27117388	MSAD_213913.t1	Medtr7g059330.1							√	√				√			√		TAATAAATAATAAATAGAACTTAAAAGTAAAGAATCAATTTTAATAGACACACATGATATATGATACAGCACCACCCAACTAAAAATCCTCCGTAATCTGAGTATATTATCTGACGTGTGAAATGAAACACACCAACTGTCAAACTTGCAAAAATGAAAACCTAGTGGGATTTGGATTAGATTTAGGAAGGAAAAATCTTTAAAAAGAGTCCAAAAAATTATGGTTTGAAAAGGGCCCAAAACGTGGACTTGACTTTGTTTTTTCTCGTTCATCCAATTGTGGAAAAATCAGGGAAGCAGGGTACGAAAATTGAGAAATACACACCTGTATAAAAAAGAACTCATTCTCAATAATTTCTTTCATTTTACAATAAATATGATTGGTTGATTTTGTTATAA…
MsMYB113	MSAD_268202.t1	Medtr4g073420.1	At4g38620	At2g37710	PubMedID:27117388	MSAD_328414.t1	Medtr7g062950.1	√	√	√		√		√										TAAAGACCAAACATGCAGTATGTCTACATGTGAAAACAACGTACACCACCAATCATCTCAACTGTTTTTTAATCAAATGTGTTATTTTAGGGGGAAAGTGTTATAAAACAATAATCATTCCACCAATAATTTTCACTCTTCAGCTGTCAGTCAGTCACATGATACATCATTAGATTGCATGTGAAAAGGAATAAACCAAGTCTAATTAGATTAATTACAGAATTGAAAATCAAAAGAACAAAACTACTTTGCAATAAGATCATATTACTGTTACATTCATGGTTCCATTAAATCATTTATTTGTTATTAGGGTTATGCTAACTAGTGTTCCTCAAACACCAGTTAAAAACATAAGAAATAGAAATTTTTTATTGATAACAATTTTTTTTTTTTTGTGAT…
MsMYB113	MSAD_268202.t1	Medtr4g073420.1	At4g38620	At3g46210	PubMedID:27117388	MSAD_283111.t1	Medtr7g076910.1			√		√		√					√					AACGTAAGTAAACTGAATTTACAAACTTAATTTACATTAACCTAGATTGAACGTAAGTAAACTGAATTTACATTAACCTAGATTGAACATAAGTAAACTTAATTTACATTAACTTAGATTGAACGTAAGTAAACTGAATTTACACTAACCTGTTATATACATACGTAAACTAAATTTACATTAACCTAAATTGAACATAAGTAAACTTAATTTACATTAACCTAGATTGAACGTAAGTAAACTGAATTTACACTAACCTAAATTGAACATACGTAAACTTGAATTTACATTAACCTACATACGTCAACTACACTAACCCCTTTTATATACATACACGTAAACTTAATTTACACTAACCTCTCACTTAAATTAAATTGACAGGCATATCTCATACCAAAA…
MsMYB113	MSAD_268202.t1	Medtr4g073420.1	At4g38620	At3g61570	PubMedID:27117388	MSAD_314191.t1	Medtr7g079200.1	√		√	√	√			√				√		√			CCAAAACAAGTAAGTGTCTATGAGAAGATTCACAATTTACTTCAAAATATGGACTTGAAACGGATATAATATTCAGTAAATTTTTAAATTTGGTTCTGATGTAGAACTATTATATACTTGTTGTCAGGCACAAACATATGACCCAGAAGGTGAATATGTTGCATACTGGTTGCCACAGTTAAGAGCAATCTCAAAAGAAAAAAGGAACTTTCCTGGTAATTTATACATTCGTCAAATTGTGCCTCTCAAGTTTGGAACGACTAGTAGACATAATAATGGAGACAAGTCACTTGGTGCAAGAAGAGGTAATGATAGAGGAAATGAACGAAGATGGAACAGGAGATAAATTTGGAGGAACAAGGGAATTAGAAGCATGGCCACCTGTTATATCACTGTATC…
MsMYB113	MSAD_268202.t1	Medtr4g073420.1	At4g38620	At1g02090	PubMedID:27117388	MSAD_299259.t1	Medtr7g081735.1				√			√		√			√		√			AGAGGCCCGCCTACATAAATGGGCCATCGCGGCCCGGCCGGTTTATATTTTACTTTTAAAATTTATTCACTATTTTGTTATGTATTTTTAATATATTATTCACTCACCACTGTTTTTTTGTTAAAATATGATTAGATGGACATAAAAGTGTAAATAATTTTTACATTAACATCGAATATTACTGAAACTCTAGATTATTCATTCAATTAAATCAAATTAATAATTTATAAAATTTAAAATTTTATAACTTTAAGCTAAATTCATTTATTTAAATATATTTTTATTTATAAATTTTAAAATAGTTGATAATTTTTTTCAAAAATATACTATTTTTTTTAACAAAAATCAAATTAAATAGAAATAATGGGCCGGCCCGGCCCAATTTTTGTATTGGGCTAA…
MsMYB113	MSAD_268202.t1	Medtr4g073420.1	At4g38620	At5g13440	PubMedID:27117388	MSAD_290614.t1	Medtr7g084150.1		√	√				√	√	√			√					AGATAGGAAAGAGTTGATGCACAGTTGATAGATAGTCAAAGAACGTTTTAAAGAAAGTGATCTAATCTACTATCTCCATCTCTAATTATACTCTTTTGAGATTTTTTTTCCCTTTTTATATAAGACTTCTTTGCTATTTTCAATTACATTAATTATTTCTTTACATACATGCCTCTATTTATTATACATCTTTTTCATCAATCAGCAATAAATAACATGTTGAAAACATAAATCAATCTTTTCTCTTAAAGGATAAAATTATAAAAACAATAGTAATTACAAACAAATTTAATACAAATATCCACTATCTTAATTTTTTTAAAACGGTCTTATAATTAGGGACGGAGGTAGAACAACTCAACCTATATTTTGTTTGGTAGGTTAACAATTTATTTGCAC…
MsMYB113	MSAD_268202.t1	Medtr4g073420.1	At4g38620	At5g36880	PubMedID:27117388	MSAD_239692.t1	Medtr7g084850.1	√		√				√	√									TTATGAAATGATTCATAGCAATTGTCCTTCCGTTTAGTCGGAGCTAACATGATCGTTCGATATTATCGTCGTGTGACGTGCAGTGGCGGAGCCCACACAACCTGTATCTTTTACATCCCCCATATACTTGTCCATATGAAATTTGCACACAATTTATTCCATTTTATTTTATTTTTCCCACCACACAAACATAACATGTTACACACTCATATATTTAATTTTTTAAAATTAAAATAAGCAATTTTTATCACACCCCGTCTCATTATCAATTAGAGAGTCTCACATTGTTTGAGAGATGACATATATAAATGCTTATAAATGGGGGCAAGGCAATACTTATCTCACATGACATTTTTGTGAGATTTTATTTCTAAACTCACCTAAATCATCTCTTTCTCC…
MsMYB113	MSAD_268202.t1	Medtr4g073420.1	At4g38620	At1g16350	PubMedID:27117388	MSAD_239751.t1	Medtr7g085560.2			√	√			√					√		√			TCTTGAAATTGCTTGGATTGCTCCATAGCATGTTTTTCTTACATTGTGTTTTTCTTATCCAATTTTCTCACTAGATTCAACTAGTGTTCCAACAGTGTCATATTGTTTCCTTCTTTTCCACTACATATGATTTAAATCACATTTTCATTTAAATGCATATGATCTTCAAATTTTCTTACTATTCAATTCTTGCCCAAAATATTGCTTCTATTACAGTGAAATAAAGAGTATTGTACTGTGAAAAAATTATGAGAAATTAAATTGAGTTTTCATTCTTTCGATTTATATCAGAAAAAGATTGAAATAAAAAGTTTATTTATGTGATTTGATTGAATAACAATCACTAACTATTGAGCTGAGTTGTGTTTTGTAAGATAGATTGATTTTCTTTACTATTAT…
MsMYB113	MSAD_268202.t1	Medtr4g073420.1	At4g38620	At2g41690	PubMedID:27117388	MSAD_251289.t1	Medtr7g091370.1	√			√			√	√		√			√				TTTTAATTTGTACCTTAACTTATGATTAATAGAGGGTACACATACTTGGCTTTATATTTTTGTAGGGCATGTGGTGGGGCATGATTGTTGGCATTTTACTTCAAACATTGATTCTTATCATTCTTACAGTAAGAACAGATTGGGACAAAGAGGTAACAGGTTTAATTGTTATTATCAAATAAACTTGCTTTCTGCATAGGTTAATTGCTTAGTTTAAATAGTTCTTTGTGAATAAATTTTTTTGGCAATAATATTTTTAATATTTTATTTGAAATCGGTTCTTTTTTTTGCATCTTCAATTTTTGTGATTATAGGTTGAAAAAGCTATTGCTCGTGTAAACTCTGAAGCTGGAAAACTAGACTTAGTTGACAATATCTAAATTAAGAGGCAACTTGTAA…
MsMYB113	MSAD_268202.t1	Medtr4g073420.1	At4g38620	At2g36910	PubMedID:27117388	MSAD_309613.t1	Medtr7g102070.1			√		√		√										TTACTAAATGTTAAATAATATTAATTTTATTTCTCAAAGCCTAATTTAATAGTTTGTGTGTATCTGTGATGAAACAAACAACTAGTGGACGTGTAAATAAATAAAAATATCATAACTATATCCTGAAACGACAACGTGATTTTCTAAACAATTTTTGGAGTGTACTAGATTACATTTATTTCCTCTAATTTCTGTCCATTTTCCACAGCACATGATATCTGAATGACTAGTCACAACTCACAAGCTAATTATACACATACTCACTACATTTATAAACAAAAGTATGTATGAACATTTAGCATTGTGTTAGGTTGGCAATGAAACGTAAAAGGAAAGAAAAAGCACACGTGAATTTGAGCAGTATAGTGTAAAAGTTTCCAACCTTTTCCAATTTTTCCC…
MsMYB113	MSAD_268202.t1	Medtr4g073420.1	At4g38620	At3g11490	PubMedID:27117388	MSAD_318317.t1	Medtr7g104900.1			√			√	√		√			√					TGGGTGAGCAAAGGGAGCCAAAATCTCAAAACAAATAAAAAAAGATCTCAAAAGTTTTTGTTTTCGAGTTGGGTTTTGGAGGATTTTAGAGTTGAAGACTTTGGAAAGTAAAGTCTATATTTGATATATTTAAAAAAAATAAAATTAAAGAGCAACAATGCAATTCTAAACAACATCAAAATCTTTAAAATGACTCTATAAATGAAGATGATATTTGAACAAAACGTCAATGATTTGACCAGCTTCCTGAAACATATGCTTCCACTAAACCTCTCTTACAGAGACAATGTCATAAATATGTCATAAACATTGTATGAATTTCTTCCTCCTTATTAGTAATCAGTTCTTTATCAGTATGAATTTTAGAAATGAAATTCTTCTTCCTTCTTAGGGAAGGCT…
MsMYB113	MSAD_268202.t1	Medtr4g073420.1	At4g38620	At1g14430	PubMedID:27117388	MSAD_223676.t1	Medtr7g114530.1				√			√				√	√					TACATTATGCATTGTCCATATCAACTGAGTCAAGCTTACGAGGACGATTCTTTCTCAAATCTACTGATTTGAAATGTGGGCCTGAGAAATCTCTTATTTAATCAAAGCTTATTCGGATTGGATAATGAAGCTTAAAACCCATACTCCATGTTCATAAACCACTAACCATTGAGGACGATGAGAGAGGAGGCACGATCGTGGGGAATTGCGCATCAAGAACTGCGTCAATCTATGAAGTCTGAATACGTAGTACAAATGTGTAAGTGGGTACACGAAAATTTTAAAATTTATAAAACAACATGGAAAACATAACGTTAAAAAAAATTTACAATAAAATTTATATACATATAAAATACTTATAATATGCATCAATTATTCTTCATTAATATATAACTAAAA…
MsMYB113	MSAD_268202.t1	Medtr4g073420.1	At4g38620	At2g46320	PubMedID:27117388	MSAD_319619.t1	Medtr7g117030.1			√				√				√				√		TTTTTGAGCAGATCATAAATAACACACTCGAATAAGAATGAACATTCGCATCTTTAATGAAACCAAGTAGGTTTGCAGAGCCAAAAACGATACTTATACCTTGATTGGTTAAGGATTCTCTCTGTGAATACACTGCTGAACACCATCAACATCAAAAGTCTCCCTACGCGCTCAATCCAAACTACAATACTTTCTGATCGCATCAGATTCAACCCCTAAAACTCAAAGATTACACCTGTCGGGACCACAAAATGAAAGTGTGAAGAATGGTAGAGTGAAACAAAAAGGAAAAGGTATATAACGAATCAAAGATCAGATAGATCAGATTCATACTTGCCCACAACTATTTTTTTACCAATTTTCATTCTCAACAGCACCATTATTTACCCAATAAAACCA…
MsMYB113	MSAD_268202.t1	Medtr4g073420.1	At4g38620	At2g46550	PubMedID:27117388	MSAD_319677.t1	Medtr7g117715.1			√				√	√			√	√			√	√	AGCTTCAAATCAGGTTTGACAATTGCCGATAATTAATGTTGGCTAAATTCAATCGTGTTCGTTAGTTACAGGTTAACTTAGTGTGCAATCAAAGTATCACAAATTTTACAACATTGTAAATTTGAACGCAAATGACATTACTTGCGCAACACTTCTGAGTTTTGACTCAACACAATTTCATTGATATTCCATGTGTTAGAACAACAATTAGTCAAAATAAAATAAGAATAAAAGAAACAATAAATCACAAGACAATCGATATGATCGTTTGTTTACGCAGTTTGGTCAAGAAACTTTTCTCTTGATCAAGAGAAAAGCTTCCATAGCGGTGATAGTTCTGCATTACTACTTGAATGAATTAGGTTTTACAGTGTTACAAGCCTATAATATCTCTGTACC…
MsMYB113	MSAD_268202.t1	Medtr4g073420.1	At4g38620	At1g18140	PubMedID:27117388	MSAD_301196.t1	Medtr7g458880.1			√	√			√	√			√						CTTACCACTCATTTTCTCACTCATTGAATCAATTTGCTAAATCACTCTAATGTCTCTTCTCTCTCATTTTCTACAAACCTCATCATATTAATCACTTTTTCTAAGAACACTTGTGGGATTTGAGATCTATATTTTTAGGGTGTTATAGGGAAGTTGTCGGTTTTATTTCATTTGAGGATCTTGGTGGAGCATCAAGGATTTAAAGCATAAGAAGTTACTTTTCACCTCTAAATGTAATTGTGCGGGTTGTTTCTCAAACAATCAAGGTCAAAGGGGATGAAGTGGAATCGTAGAAAACAAGATTTATTGGGTAAGAAGGTTGAAGGATTGCATGCTATCTTGATTTGAAGACCTTGAGATTCATCCAATTTCAAGGAGCTTTAAGATTGGAGGCATTTT…
MsMYB113	MSAD_268202.t1	Medtr4g073420.1	At4g38620	At2g45040	PubMedID:27117388	MSAD_231216.t1	Medtr8g005900.1	√			√			√				√						AAAACTAAATGAGTCATGGTTCATCTTGATTGACTAATAAAAAAATGAACGAGTCATAATTCAATTTGATTGGATGATAAGAAAGCATTAAATGAGATGAAGAATGTGAAGATGCCACATGTACTCTTCAAAAAAAATTAAGGCAAATGTTTATAATAGAGATAGAGATAGAGATGGTGAGTGAACGGATAGCACTTGGGTGACATTGGGCTTTCAATGTCATGTGACGTTAACCAATCGTGATATGCCATGTGTAACCATTTATTTTAAAATATAACAAAAAAGAAAAAGTCTTTGTAAAAAAGAAAGTAAAAAGCCACTTGTCATATTGTGGTTAGCCAATGTCAATGGCGTATCCAGGACCCTGAGTCAGGGGTGCAAAAGTTTTTAACTCATTAA…
MsMYB113	MSAD_268202.t1	Medtr4g073420.1	At4g38620	At3g60240	PubMedID:27117388	MSAD_327974.t1	Medtr8g008680.1		√	√		√						√	√			√		CTGCAGCTGCAGCACCTAGGATGCAACAAAATGAAAAAGTTTATATATATATCTTTTATCTCTGAAAATAAGATGTTTCTTAAAGTAGTTCTTTAATATTTTTTCAGTCCCAATATTTAACAAATTATCGTCTTTTTCCTTTCAAAAAATAAAATAAAAATTAACGTCTTTATATTTTTCATTATTGTGCATTTTCCTTTTATTTTAAAGAATAAAATAAAATAAAATAAAATAAAGGATTGCTGTTCTTTAGTGCGCATTCGAGTGATTCTACTTTGTAAAGTCATGACATGAGGGTGAAAACAGGGTTCATAAACTCTTACAGTTGTCCTTGGTTGTAGGACGAATATAGTAAGCCTGTGACATACCCTTCAGATTCAGACGTGGTCACAATTTGAA…
MsMYB113	MSAD_268202.t1	Medtr4g073420.1	At4g38620	At1g15210	PubMedID:27117388	MSAD_226276.t1	Medtr8g014360.1							√	√									TAAAAATACCATGATTAATATTACTAACTTGTATACGAATATGAAAAATCAAAGGTTAATATATCTTTATCTCTTGTAATATTAACGATTTTCGGTTTGCTCCTGTAAAAACATTTGTTTAGATTCTAACCCTATAATTTGAAGATTCTTTGGTTTTAAAATTTAAGGTACTTTTGTCCCTTGTAAACTTGTAATCTGAGAGAATTTTAGTTTACTGCCCGCCATATCATCAATTTTGTACGGTCAAAATTCATCCAAAACCAAAGAATTTTCAATATACAGGGTTGGAATCTAAACAAATTTTGTTACAGAGATAAACCGGAAATCGCTAATAAAACAAGACTTATTATGAGCAAACCAAATACCATAACATAAAGAAAGAATATATCAGATGATATC…
MsMYB113	MSAD_268202.t1	Medtr4g073420.1	At4g38620	At1g14520	PubMedID:27117388	MSAD_226227.t1	Medtr8g015220.1				√			√	√	√					√			TGTAACATAATTCACGTATGCAAATAGGTGGAGAATTCGAGATTAAACTCAAGTATTTCTGATAAGGATTTTTATAACCTGTGCAATCTTGCACAGCTTTAGCCTTAATCAGTGCCCCTTTTCTCTCTCTTATTAACCTCTCCAACATTTTCTCTATTATATTAATTGCCATTCTTTCTTTTAATTGGTTTTAGAAACAAATGTGTGTGACAGTGTACGATAGAAATTCAGAGATTGACCCACCCACCATACCACATCGCCACTTCCCCCTGTGCACCGCATCAATCAACTGCCATCTACATAACCGAAACAGACATGTGCCACCTTCCTCCTCCATGTTGATGAATGATCAAAATGAAAGTTCTAACACGCGGCTGAAACGTGTGGGACAGTGGGAGA…
MsMYB113	MSAD_268202.t1	Medtr4g073420.1	At4g38620	At4g28080	PubMedID:27117388	MSAD_224641.t1	Medtr8g027685.1		√	√	√	√		√	√			√	√					GTTTGTTGTCTTAAATATGACAGAAATATGCACAAGCTAGTAAGTCTAACTATTTTGAATGAGAAAAACTTCTGTGTATATGTTGATCTTCTATTCATATCTGGATAATTAGGTTTATTAACTTCTCTTGTTTGACATTATGTTTTTTATCCACATTACTGTGTTGGAAATTACCTATTTCAAACACAATAATGCGAGAAAAATAGCTAAATAGGAAAATCCATTCTCATGTTAAATTTCACTTGATTTAATCATGTGAAAATTGTGTTTCTTTTTCATGAGTGTTACCTATTCAATCTCTGAGATTTACACTACTTTTTATATCACAAGGTGATATAAAAAGATGATTCATTCCAATGTGAATAATCAATATGGCATGATAAAATTGGTAGATAACTT…
MsMYB113	MSAD_268202.t1	Medtr4g073420.1	At4g38620	At2g43800	PubMedID:27117388	MSAD_233896.t1	Medtr8g027995.1				√			√	√			√						TAATAAATCTCAAAATATGATTTTAAAATTATTTTTTTAGCTTCTGTCAAATAAAAAGAATGAAATTGAAAATTGACCATTGTTTTCTTAAAATCGACGTAACTTTTTGTTATGAAGAATTATGAGAAAATCAATGGTGGTTAATTGGGTTAGATATGACCAACTAGAAGGTGATTAGGGCTAAAAAGGAGCTTTTAGTGACATAACAAAAACAAAAAGGGTGAGACCCTTTACGGTCATTTTCTCCTCGGAACATGCCCAACACTTTTAGCTGGCAGGACCCTTCCCTTTGTCTACTACCCCCTCCATATAAACTTATAGGCATTAAATTTCTCTTTTTCTTTTTCTTATTCCTAGGAAAAAGAAGAGAATTATCTTATCCCAATTATTAAAGTTTTT…
MsMYB113	MSAD_268202.t1	Medtr4g073420.1	At4g38620	At2g45890	PubMedID:27117388	MSAD_279010.t1	Medtr8g030850.2	√				√	√	√	√			√						CAACTCAACCAACACATGTACAAAAGAAAGGAAAGAGGTTGTCAAAGAAGACAGGGGTAGGGTCTGCATCTCAGCCTTAGATTAAGCACTGTGAATGTCTTTTTGGAATGTAATTTGTGCTATTAAGCACTTTTGAATGTCTTTTTGGTTAACTGGTATTAAGTGGTGCCTATTAAGTAGTAATTGATGTAATATGTGCTATTGACTGATATTTAAGCACATCTGACTTTATTTTTGGTTAGCAATGTCTATGCACTTTGTAACTGTTAAGCACTTAGTGTTGTAACATTGTTGTAATGCACTTATTAATATATGGAATGATGTGCTATTAAGCACTTTTTAATGCCTTATAGCAGCCTATAATATAGTTTTTGTTATAGCCATTATAGTAGCCTATAA…
MsMYB113	MSAD_268202.t1	Medtr4g073420.1	At4g38620	At2g45680	PubMedID:27117388	MSAD_233451.t1	Medtr8g033070.1	√		√	√			√					√	√				TGTGCATAGAAATTCCATACACTTTCAGCCAAACCCTTCTTCTACTAGCCACCAATTGTGGAGACCATCTCTTAATATCCTTAAACACAACTGACCACCACTGCCCATGTTCCTTCCTATCTAGTTCGAATCGCACCGGATCCTCCACTTGCAGTAGCACCAGATTATCACCCATAGTTGTCACCCTAACATTCTTAATCCCTTCCATCACTAAGCTATTTTGCACTGACTTTGCCTCCCTGTGATATGAAAGCTCAGCCACAAAGCACTTCTCCAGCACCTTCAATCTTGTTTCCGTCGGAACCACCTCCACACACCTTTGCTCACTATCCTCATACAGGTTCTGATCCTGCACCTTAGTTAAAGCAGATTTGAAGGTTTTCCCCTCCAACACCTTAG…
MsMYB113	MSAD_268202.t1	Medtr4g073420.1	At4g38620	At1g79560	PubMedID:27117388	MSAD_237327.t1	Medtr8g056860.1	√		√	√			√	√				√					CCCTGTGGCGTGTGGTAGTGCTTAATGCGAGGATGAGCTTTTAGCTCTTAATGGATGCAGGGTGCTATAGAGACGCACATGTATCTACCTACATTAGTGTGAAGGTTTAGACCACCTTTTATGAAAGACTTCGGCAATCTTTCTAGAGCACTCATTAGCAGCCCAAGATGATAAAAGTCTTAATTATGATGAAAATAATTATCGTGGAGCTATCACAATTTTAAAGGTAAAAGCGTGTATCGTGGGGGGTCTCATCTTTAATCTATTAAGTTCAAGAGTAATTCACTACGTGACATTAACACTTAAGCATGAAAAAACATTTCCTTAATGGCTATTAGTGAGGGATTGTTGGATATAATGAAAATCAATTATCTTATATTCCTTTAATTATATTTCCTT…
MsMYB113	MSAD_268202.t1	Medtr4g073420.1	At4g38620	At1g13635	PubMedID:27117388	MSAD_330955.t1	Medtr8g066040.1			√			√			√				√				TTTTCAAAAACAAAATATTTTACAACGACCTTTTTAAAAATCAAAATATTTTACAGGGACTATTTTGCAGGAACAATCGATTAAAAAAATTGATTTTTTAACAAAACCCTAACCATAAACCAAAACCCTAAACCGGAATAGAAACAAACCCTGACTATAAAATTAAAGCAAAGCTGAACAATGAATTCGGGTTCTAATTCCTTCTTCTTCTCTTACGATTTGCTTCTTCTCCTTTTCTCAGAGTTGTTTCATATTCCCTCCCTCTCTTTTTATTTTCTAAAACTAGCCACTTCTCTCTCTAGCCAGGAAACAAGCTTTTATATGTGCCCACATGGGCAATCATTTAAGAATTTGACATAAAGGATTTTTTTGGGAAACAAAGGTGTTGAGGGACCAAAA…
MsMYB113	MSAD_268202.t1	Medtr4g073420.1	At4g38620	At3g47110	PubMedID:27117388	MSAD_319220.t1	Medtr8g068540.1	√	√	√	√	√	√		√				√	√		√		AACGTTTTTTTCCGTTAGCAAAATAGGTCATCGCTGTTAATTGTTGCTGATTGAGCAAACACTGTTAATTAGATATAATATAAGATAAGGCCTTAAATCTTCACCAATAGTTTTAAATCGGAAAATGGCATTACAAATTGACATCTCACTAACATTTTTTCTTTTTTGTAAATAGAAATATATTTCATTCACCAAAACAGATATTACAAATTTTATGGTGATAAAAAACCATAAAAAAGAATTTCGATCAAAGCTCTAACAACACGAGAAAAATCTAAGGCCTTATAAACTTAACATTAGGTTATTTAGTTTAATCATTTTGATTTAGCTAAAAAGTTCATGTACTGACTGATGCAAGTTTTGAAATCTACCATTCATCTTCTTTCGGATCAGACACTG…
MsMYB113	MSAD_268202.t1	Medtr4g073420.1	At4g38620	At5g56160	PubMedID:27117388	MSAD_259879.t1	Medtr8g071000.1		√			√		√	√	√		√	√					AAAAAATTAAAAAAAAATCATTGTCATACATATAAGTTAGCCAAATTATCATCTTATCAGTTGTATATAGCGAATCAACCAATCAAACGACTATCAGCTGAGCACAAGGCTAGTCGGCAAATGATTTATTCGGCAAAGACCAAAATTACGAGGGTGCAAATCAAACCGAGTGAATAATAATGTCAATATCATAAGGTAACCAGAGTCATTTGCCGAATAAATCGGACCGACGCTATGGGTCTTTGCCGAATAAATCATTTGTCGACTAGCCTTGTGCTCCATGAGATCAAATGGAGGAGGGGAGTGAATAATAATGTCAATATCAGAAGCAGCCCCTAACTTTGCCATAAAATCCACACTCTGGTTACATTCTCTGAGAGTGTGATGAATTGAGAAGTT…
MsMYB113	MSAD_268202.t1	Medtr4g073420.1	At4g38620	At4g35880	PubMedID:27117388	MSAD_272381.t1	Medtr8g075010.1			√	√		√	√	√			√	√		√			ATCGGAGGGATATACCAAAATAGGTTAGTAACGTCCCAATGACCTCATCACTTGTATAGTATACCTAAGAAAAATAAGTGCAACATTAGTGTTATTTAATATATCCAACAATATAGACAGGGGGGATTCGAAGAATCCTAACCGCTGTTTACTTTTCTTCAACCAAAAATAGGTAACTTGCTATTTTGCAAACAGATAAAAAATTGTAAGACTTTCAAACCATTTATCTTTTATATCGTCAACTTAAAAAAATAAGTAACGAGAATTGTTTGGAAGAAATGACAATTCCTCCGGATACGATACTATACTTATCACTTTATTACTTGATAAATGATTTGATACATTTGCCAGAACTGAAACCGTGCATCACGTACCCGTCTTTCCGTTCTTTTTAGAGTG…
MsMYB113	MSAD_268202.t1	Medtr4g073420.1	At4g38620	At5g66130	PubMedID:27117388	MSAD_272402.t1	Medtr8g075250.1	√		√	√			√	√		√		√			√		CAAGTCTTGTTTCTTCTTCCTTCTGCAGATATTAACCTATGAATTTTCTTGTTGGACACACAATTATCAAAGACTTGTGTACTTTATGACTGCATACTCTAACATAACTATCAACTTGTGTAAAAAAAAAAAAGTCTTTTATACATGTATATATTTAAAACACATGAGAGTAACATACCTTCCATAAAGATTTATCAGCAATGCTATATGGTACGAAAAAATGCACGTACGGAAATAGACGAATGCCCAACTTGTCCAATTTTTATGAAATTAAAAACTGATATAGTATGCTTTGACGGAAATCATGGGTAATGGCTAATAAAAAGCTTGTCAATTATAACATGAGAAGTATTGAAACAACCAATTTACGGAATACATGGCTGAATGGCAAGCAATAAC…
MsMYB113	MSAD_268202.t1	Medtr4g073420.1	At4g38620	At4g36630	PubMedID:27117388	MSAD_281225.t1	Medtr8g077680.1	√		√					√						√		√	AATGCTATACCCCTTGGAAAATACACAACTCTTCAACCAAGCACACATCTTCAAAATAATTAATACAATTCTATGATATATGCAGAATGATATTTAATTTAATTGGAAAACTATATTATTACTTTTAATAAATATCAAAGTGTAATTATTCTTTTTAGAGCTGTACGTGTAATTTAGAAATTGTATTAATTGAAGTGACTTTGTATTTCATGTAAGTGAAAATTTAAAACAATTATTACAAGTCAATTTTTGATGTTTAACTATAAAAGTAATAAATAAAATTGACCCGTACAACAATATAATATTGTATTTTTTTTTATCTTTTTTCTTTATAATTTTTTTAAAAAAAAATGAGAAGATAATGCCCCAATAATATATTGTGATAAAATAAAATAACAG…
MsMYB113	MSAD_268202.t1	Medtr4g073420.1	At4g38620	At2g34650	PubMedID:27117388	MSAD_319468.t1	Medtr8g089420.1					√		√	√			√						CCTAATAACAATACTACACTAAATCTTTAACTAAGAGTTCATAATTCTTACATTATCTTAAATACGTCTCATTGTGGTTATAATTCAAAATTAAAAAAACCAATATATATTCATAATATGTATCTAGTGCCAAACGAGGATTAAAATATCTCCATTTTAAGTCTGTTAAATATTAAAACATCTTTTAACTCAATTGCTTTGAGCATTTATTCTAGGGATTATATTAAAACTTATGCCCTAGGTATTAAAACTTGTTGCAATATGTATCTAGACCAATGCTCTATTCATGAGACAAGGTTAAAGAGTTTGTAATCTTTTGGGCATGAAAATATTGAGGTACATGAAGACCCCTAAACAAGACTATCACAAGATGTTTTCATTATACTACGAGGAAAATGC…
MsMYB113	MSAD_268202.t1	Medtr4g073420.1	At4g38620	At5g09750	PubMedID:27117388	MSAD_332753.t1	Medtr8g093500.1			√				√	√		√					√		TTCTTTCGATCACCCTTTCCCATAACTTCATTAAAATTTTCAAGCGTATGCCATACATTCTGTTTATTTTTGCATGTGTTTTAAATCTGCAGCTTTTTGAAAAAAATGGTTTCCACCATCTTAATTTCCACCCTCTTCATTAATTTAATAATACACACACATATATTCTCCTTCTCTTCACTAAACAACAAATAAAAAAATAAAAAACAAAAAGGATGGGGAAGGTAAAGATGCCGTGAGAAATGAGAATACGATGGACGGCGTCACGGCATGCATGCATTACCGTTTCACAGAATAGCACGCAATTACAATGAATGTTGTTATCTAATCAAACGGTTGTAACTGAATGTCCTCATAGTTTTCAGTAGAGTACATATATCTTGTGCTCATCAGGTGGTC…
MsMYB113	MSAD_268202.t1	Medtr4g073420.1	At4g38620	At1g64160	PubMedID:27117388	MSAD_298283.t1	Medtr8g099135.1			√					√		√	√				√		TCAGTATATATAATGAGAAGTAATAGCTCACTGATCGGATATGATTACAATTTAATGATTGAGAGATATGATTACAACTAGCTTTCATATTATTAAAAACATTAAATTGAGGGGTGGGGTTGCAAGATTTGTTGGTTTGAAGCGAAAAGTAAATGAGATTGATTCAGATGTTTTAAGGATGATTATGATTAATTGCAAGTTTCCTATCAAATACCATAAGACCATATATACGATGGTTAACCTCGTGGGACGAAGATTCTCGTCCCTCCATATGTTGGATTGTTTCATACATATATATAACTTAAGGTTATAAAAAACTATGGACTTATCCTCCCAAACGTAATTGACTCCATTATATCATGTTTCTCCTCAACTATTTAAGGGGTTTATACTCACACA…
MsMYB113	MSAD_268202.t1	Medtr4g073420.1	At4g38620	At1g73140	PubMedID:27117388	MSAD_325359.t1	Medtr8g463790.1			√	√				√						√		√	TTTCAAAAAATACATTGTTCCCTAAGATATTTCGTGTTAACATATAGTGATATAGGGCAATATTTTCCAATTGTTGCATGAATCCTACCACCACTTGAATCTGACAAAATTGCTTCAACATAAAAAAATCATAGTTGGTCCATTAAAACTTTGACACCTACAACCGAATGACTTTACCCCTTAAATTCCATGAAGATAGTTTACCATGTCTCACCGGAAGAAACTTAAACACAAAATTCTTTTTTGTAGTAAACAAAATTTGCATGTACCAATTACCAATATGAAAAAGTCGATATGAGAATTATCTTTTTTGAGGCGGGGTTTGATAAATTTTTTAAAACTCATAATTATTTTCAAAATATGAACATTAAAGTAGTTATTTTTTTTTTTTTACAAAAC…
MsMYB120	MSAD_271189.t1	Medtr4g065017.1	At3g08500	At4g18780	PubMedID:25533953	MSAD_271394.t1	Medtr2g016630.1								√				√					CTCAAATAATGTGAAAAGAGTAAATTTCACCTTATATTAAAGTAGCAATAAAAACTTAAGTACCTTTTAAATCACTTAACTTATTTTTGAAGTTTATGTTGGTCTCTAAACTTTTAAAAGTAACTTTACTATATTAATTAACTCGTATTATGTGAGAAAAAAAATTGTGTTTTTCAATGTCATGTATGTTGGTGAACTAATTGATCTGGGATTTTATGATTTTTGTTTTGTTGAAGAAAATAAGAAACAGTTTTAATTAGAGGATGAGATAGAGAGAAAGAGATTAGAGAAGTAAAACTGAATGCATTGTGTATATACAACATCTTCCGGCAATAGTTTGCATAATAAATAAAGGCTAACTGTCTAACCAATTAGCTAAAAACAAGGAAAAGTTAATTA…
MsMYB120	MSAD_271189.t1	Medtr4g065017.1	At3g08500	At5g44030	PubMedID:25533953	MSAD_252569.t1	Medtr2g035780.1				√	√		√	√			√	√				√	AAAACGTGTTATGTTGGAATTATGTAGTGCAAATATAGAATGTGGGAGACTTGCATTTAAGAGAAGATTGTTGGATTCGAGTGTGAGTGGTTTCCCACATCCAATGTAGTTGAGTTAAATATTAGATATATAATAGGTGTGACTCATATACCAAACGTCTTAAGATTTCTAATAGAGATTAGTTGTTTCTCTACCGTGGTCATGGATCATTGGTTCTATTGCTCTTGACGCTCCATCAAACACCTCAACAAATGGTATTAGAGTCTTAGTTCGACTTAATTGTGGAGTTGGAGTGGATCATGATGTTGGATTCTTGTATTTGAACTCTTTCTCGCATTGTAGTAAGGGCGTGTTCTATTGGTTAATAGATGTGCAAGTATAGGATGTAGAAAACTCACA…
MsMYB120	MSAD_271189.t1	Medtr4g065017.1	At3g08500	At1g51680	PubMedID:25533953	MSAD_299015.t1	Medtr2g105570.1					√		√	√			√						GAAAATAACTTACAGAATCGTGGGTGAGATAGGTATCGCAGAAGTCACAGTAGTACCTGCAATGCAGAATTGAATAAAATGTGATGAATTGAATGAAATGTGAAATTTAAATATTTGTGATTATAGGTTGAAGGAGTGAGTTGCAGTACCGAGGCATGGCTGATTCAGTGAAAAACCCTAGAAGAGGTATGAAGTAAAAAGGTGATGAGGCACGCACGGAACGGACCTTCAGCTTGATGTTGTTGATGAATTCAGAACACCTTTGCCTCTGTGCCCAAACTATACAACTTTCTGGATATCACTATTTCGGAGCTAGTACTATTTGCTTTTAAAATTTTGTTTGGGTTAGTTTTTCTTTTTTTAAGGATATTTTTTTTTAGTTTATATTCCTGGTTAAAT…
MsMYB120	MSAD_271189.t1	Medtr4g065017.1	At3g08500	At5g48930	PubMedID:25533953	MSAD_297133.t1	Medtr4g007540.2				√			√	√				√		√			CCCCGTAGGTTGGTTGGATGCTGGCGCGGGCAGCCATTCTGTAACTTCTTGATGGTGTGTCTGGTAATAGCTTTTGTTCTGCCATGGTTCTTTCGTGTGAAGATGTTCTAGCTATGGATTCAAAAACTATCCTGCCTTGTCTATATGATGAATACATTATTGGTTCATGGTACATACTTTTATTTAAAGAGGTGGCATTGCTTAATTAACCATGTGCAAGAAAATTAACAGGCTTGGCAAGTTACGGCCATATTGTTTCCTTATTGAAAAATTCTTTGGATTGGAGTGCTTAATGTGTTCTGAGTATAGATTGATACAATAGGATTACCTTTTCTCTTAGGGATAAGAGAAAAATAAGATATTTTGCTTGTGACACAGGTGTTGTATAGAAACGATGCA…
MsMYB120	MSAD_271189.t1	Medtr4g065017.1	At3g08500	At5g17420	PubMedID:25533953	MSAD_317649.t1	Medtr4g130510.1		√	√	√			√	√								√	CCTTTTTCTCTCTCCATTGTTTTTAACCAATGAAAAGAGAGAAAAAAGAAGTTGTCACAAAAGTTGTACAAAATAGTTGTTCAAATATCACTACTCTTTCTTTTTAGAGGTGTGTTAATTGAACAACCATTTGAGTGACAATTTTTGTGACAATCACTAATTTACAAAGGAAAGTAGATAGTGACACGGAAACCAAAGTAATAGAGAGAGAAAGTAAAAAAATAATGTGAATATGAGAGATAAAGTTGTCACGTAGGTTGTCACAAAATGGGTGTCAAAATATCATTTCTCTTCTTTTTATATTACATTAATAAAATGAAAATTCTATGGTGAAGTCATCAGAATGACTTTTCTGGTGAAGTTAACATTATAGCATCAAAAGTGTTGTGAGTAACACCC…
MsMYB120	MSAD_271189.t1	Medtr4g065017.1	At3g08500	At1g65860	PubMedID:25352272	MSAD_210786.t1	Medtr5g012130.1	√		√	√			√	√		√		√				√	GGCTATGATTACACAATAACAGAATCAACTTTAAATGATCATGACAGTTAATATGAAATCAGACAATTGAAATTAGAAACAGTGTGACACGCTTATTGCATCAGATTCATTTCCTTATATACAAGGCCTTAAAATGACCTAACTAACAAAATTTCTTTTAACTAACTTATATTAGCTAATAATAACTAGAAGTAACAAAAAAAAAACAAAAAAAAACAGTAGTATCCTCAGATATATTTGTTAATGCAACTATAGGATTTCTGGGATTCACATTTAATATAGACACCATGAAAAACAAAGAACATTGCTTAGGTTACAAACTGCATCCAATTTAACCATGAAACGTTTTTCCTAATTTAAGAGTGTATATAATATATATATATATATATATATATATAT…
MsMYB120	MSAD_271189.t1	Medtr4g065017.1	At3g08500	At2g30490	PubMedID:25533953	MSAD_311878.t1	Medtr5g075450.1	√				√		√					√			√	√	TTTAAAATCCCATAGAATCCTAATCCAATACATCCCCCTAAATGAGTATATTTATACTTACTTTTTCATTATTCCAATTATACACTTAAATATTTTTTTCTATAATAAAGATTGTTCTCAATATCATTAAAAAAAATAATTTAGATTTTATTTTTTATTATATTGGTTGGTGTCGTTGAAATATATAATCATGGGTTATTTTGGTTTGTTATAACTTGAAAGCAACAAATATTTATATTTTTAGATTTAATCAAAATCAAAATTTAATAAAAAAAACACCGTTCATAATTTTCAAACGTTAACGCAATAAAAAGAGCGGAAAGACGAGCACGTGAGAGTCCGCCTTTTCGCTAGTCTATAGGTATTGAATATTTTGCACTTTCATAGTGTAACAAACTA…
MsMYB132	MSAD_278758.t1	Medtr4g019370.1	At3g09230	At5g17420	PubMedID:25533953	MSAD_317649.t1	Medtr4g130510.1			√		√			√									TAAACACCAGTAAACAATAAAACACAACTTTTGGTGCATATGATATGCTCAATAATTAAAAATCCGAACCAAAAAAGTATAGGAGTATGTGTACAAGAGTGAGATAGCCTTTGAAATCATTATGCACTTCACAATATAAAAAGCATAAAACGGGACCTCTCACCTTAGTGTGCTATAGTTTTCTTCAAGTTAGGAAAAGAAGACTCAAATAAACACTGAAATCAGGACTCGTAATCATCGTCATTTGTTTTGTTGATAAAATAGTTACTACAGCTCATCATATCATTATAAAAAATAAAATTAGAATCATTGTGAATGCGTTCAATTATTTAAAAGTAACCATGCATTTATATATACGAACAAGGCATGAGAAAGAGAGATTTTCACGTGTTAGAAGAA…
MsMYB132	MSAD_278758.t1	Medtr4g019370.1	At3g09230	At4g36890	PubMedID:25533953	MSAD_211647.t1	Medtr5g016600.1			√		√	√						√		√	√		CCGGGGCTACATTATTTATGGACCGTCCCCTGCTCGTCTCTTCCCTTAAAACAAATAATGAGATTTGGAATCAACCCATTCAATTTCTTTAGCTATTTTTATATGTTATAATAATGACATAATATTGTGGACCATGGTTTGTCCATTTTTTGACAATATTAAATTATTTTATGTCCATTTAATGACAGATTTATTGTTTGTTTGCTTAAATTCGTATAATAGTTACCATTTCTAAATAGATAGATGTAAAAAGTAATTTTATGTTCAAGTGCATTTGGTCCGTAGTTACTTGCTTTGAAGGAAAAGTAAGTTTAAATATACTCAAATATGAAAACTGAAAACAAACACATTCTGAAGAGTGGGAATTGACGGATGAAATAAGTGATCAATGGAAGGAAA…
MsMYB144	MSAD_284137.t1	Medtr1g086510.1	At1g48000	At1g65860	PubMedID:25352272	MSAD_210786.t1	Medtr5g012130.1							√	√	√		√				√		TAGTACTAATTCAATTGTATTTGGTCCCATGTTTTAATATATGGGAGTTCTTTTGATATTCAAAAGAAATAGTGCTCCTAAAACACAAAGAAAGAGAGACGTATGTGAAACATATATTGGCTTATGTTTCTTCTTCAACCGTAACTTGTTATGTTCTTGAGTACTCTTCACATGGCCGGTTATAGTTCTCATTATTTCAAAATGGATCGTCTTTTTTCTTTTTTTAGGAAAAAAAATAATCATATTGATGCTCATCTTATTGAACTCATTATTTTGAAATAGGTCATCCTTAACATTCATTTTGTCAAACTTCTAAATTTCATAGAAAAAATAATATTGAAATTATTTAAGGTCGTTAAATAAATTTGCAAAAGTGAGCAAATAAAAGTTAAATCTAAC…
MsMYB145	MSAD_284155.t1	Medtr1g045610.1	At3g24310	At2g20610	PubMedID:25352272	MSAD_265971.t1	Medtr2g090615.1				√				√		√							TTTTATTTTTTGTGAAATTTAGTCCACATAAGCTTAATGCCAGGTGAGTTTTGATATTGATGTAATTGATATTTAACTATGTTTTTGGAGTGTGATGTATCAAAAAGGACAGCATGCAAAATAAATTTCTAACATGTATACGTAGCACGGATACGGACACGGACACCAGACACGACAGGGACACTGACACGTCGACACAATTAATAATTTAAAAAAATCACATAATTTAGTGTAATTACAAGTGTGAGTGTCGTGTTAATGTCGGACACGACACGTATCCGATACCGGGACACGCCTAATCTGAGGAATGTACGTGCTTCTTATGATCAAGTATTATTCTCTCTTTATATATTTAACCTCCGATTCTCATGAAAAAGACGCCAATAATTTTAAGTTCAT…
MsMYB145	MSAD_284155.t1	Medtr1g045610.1	At3g24310	At2g30860	PubMedID:25352272	MSAD_301103.t1	Medtr3g450930.1	√		√				√	√				√					GTTAGACTTAATTTTGTAGTTAGTCTTTATATTATTGTATATAGTTTCAATTGAAACAAAAACCTCATATTCACAAATGACAAGTATCTGTAATTAGGAGTTCAGATGAATGATAAATATTGTTTTAGTCGATGTTTCATTTCGAATTCTTTCCAACCAATTGATCTTATGCTCATTAACCACTCGACTAACCATAATTTTTATTTTTTTTAAACTTGATATTTAATACAATGACCAACTAATTTAGGGACCAAACCCGTAATTATTCCAATGTGAACTCTTTGAATTTCTAGAAATGAGAAAATGTAATTTACTCAAGAAGAAATAAAAAAAAAAAAAACATAAGTTTTCTCTCCCCTGTGTTGCTCGTAGTCCCAAAATGGTCGGAAATTAACTTCT…
MsMYB145	MSAD_284155.t1	Medtr1g045610.1	At3g24310	At1g65860	PubMedID:25352272	MSAD_210786.t1	Medtr5g012130.1		√	√	√					√		√	√			√		AAATCAAACTATAGATTAACTGGGAACTCGTTTATTGACTTAGCAAATCATTTGGAAAATTGATCGCTATAGATAATAACGAAAAAAAAAATCATAATTATATATAGTAATTTTATTATTAGGATATAGTGTTTACAACACTTCCACACTACATACCACTTGCACAAAATTGCGATGGTAAAATATTATAATTTCTTTAGATAAACATGACTAGGTGTAAAAAATATTATTTATAAAAAAAATACATATTAATAAATTTAAAGAGTGAAGATCTATTTTAGTTCCTAAGATTAAATTTAATCCTTAAGAAAAATAAATTTCATTTATAAATGTTGGGAATAATAAACCGAAACAACATAGTTTGCTATTTTTTTTATTTTTTTTTGGTTTGGTTGATGG…
MsMYB184	MSAD_303035.t1	Medtr1g043080.1	At3g23250	At5g37300	PubMedID:27117388	MSAD_224441.t1	Medtr1g008160.1			√		√			√				√				√	CCTTATCAAATGAGCTAAGCTCAGAGACTGTCAGTATTATATTTTATGAGTGTGATTGGAAATACTATTTTATGCAATATTTTTGATAAAAAAAAATAATTTTAGTCAATATATTTCAAATGTTTTAAAGATAGATGAAACAACAAAATCATTATAAACTCACAATATAAGTGGAGATGTCAGAGTTCAAACTCTATCATTGTGTCCGACGTAACAATTTTAAAATTTTGACAGTTCAACTAGAACATATGGACGTTTTAAAGACGCTTTTATTAGCTAAAAATTGCATTTTTTTTTTGTACAAGCTAAAAAATGTATTTTATCTACATATGCAATTTTAGTGGCATATCTGCGTCACTATACAATTTTCCATTAATAATTTTCTTGTTTAGAACATCG…
MsMYB184	MSAD_303035.t1	Medtr1g043080.1	At3g23250	At3g53260	PubMedID:27117388	MSAD_274426.t1	Medtr1g064090.1								√				√	√				ATTATCATTGCACCATAATGTTTGTAATAAAAAATCTAAAATATCCTATATATATATTGTCAAGTAGCCTAGTGGTTGGAGCTCACACATTATAAATGTGGAGAAGTGGGGTGTCAGGGGTTCGAACCCCTGCCCCTGCATAAATTATGTAATGTCCCTACCAACTGAACTAAGCTCACGGGGACAAAAATATCCTATATATAATAAATGGGTTAATACATGTTCATCCCCTATAATATAGAAGATGAAGAATGCTAGCAACACTCACTTTTCAAAACTCTCTCTTTAGTGGTCACTTTTTTATTGGATGAAATCAATGTATGTCTCACTAATTTGTGTGGGTTCAATTTTCAAAGTATAAACACACAATGATTTAAACTAATAAGAGAGTGAGTATTA…
MsMYB184	MSAD_303035.t1	Medtr1g043080.1	At3g23250	At5g51840	PubMedID:27117388	MSAD_304341.t1	Medtr1g101945.1	√	√			√		√	√				√					CGTTTGTTTTCACATCAAAACTCCAAACAAACAAACATTTCCAAAACAGGACATAAAATAAGACCACGTGTCCGATCTAAATCTTCAATATCTTCTTCATTGCAATGTCCACCCGTGGCCACCCTTCTTTTGATCTTATCCACGTCATCATCAAACCATTGCCAACCTGGAAATATCTCCCTCCACGTGGCACATTTGGAACATTCAACACCTCCACTTCATCCACGTCACCAATCCTGCACCCACTCAATATCTCTCTCCTCTAACTTTCGCATTATCTTCTCCTAAGCTCAAGATTTTTTTTCTTTCCTTTTTCCATTTTTGTCAAACTATTTTCTTAATTCTGTTCAGTACCATAATTCAATTACCGATTATTATTATTATTATGATGTAGTAATA…
MsMYB184	MSAD_303035.t1	Medtr1g043080.1	At3g23250	At4g35550	PubMedID:27117388	MSAD_277106.t1	Medtr1g115315.1			√		√	√	√	√			√		√	√			GGCTTGAGATTTTAGAGTTTGCTCCTCTCAAAGTCTCAGGTTCGATTCCCACTTGGTGCCAATTTCGGTGGACAAATTCATACATAGCTTGCTCCGGCTTAGAACAAGCCCTCGCAAGTGGACAGTGTGATTGGTCCCCTCGGATTAGTCGGTCCTTGGATCGGATATCGAGTTTTAAAAAAATAAAAAAAAATATCAATCCGAGATTGAACAATTCAAAGTTTTTTATTCCTAAATCTCCCTCTTTTTTGTCCTAACAGATTTTATTCCAACAAACCCATGATGTTTTCATAATTTCCTCATCTCCTTGCCATAGGAATCTTCTCTGCATCTTTGTTAGCAAATATATGACTTTCTTAGGATCTTTAAAGAAGGAGAAGAAATAAAGAGGCAGTGAAG…
MsMYB184	MSAD_303035.t1	Medtr1g043080.1	At3g23250	At3g55130	PubMedID:27117388	MSAD_277204.t1	Medtr1g115790.1			√	√			√	√				√					ATGTACCAACTTTCATATATTAAATTAGAATCGATCGCTTTATTTCATTTTAAAAAAGAGTTAACACAAAGATCATACACATAATATAAAATTTAATTTTCTATTACTAAAAAATGTCATCAATTTATTCATCGGAATTTCAGCGAAAATCACAATCTATCATCATAAAAGAAAAGATCGTAATCAAGACATGATTTTCAAACGCGGAGACGTAAAGGGAAAACACAAAAAAGCAGCAGGGAGTGCAATAACTAAGAGACTTAATTAATTAGTCAGCGGTTTATCCCAATTGCCGACATGAAGAAGAACAAACAAATAGTATCAATTTAGTTGTTGAGATATCCACTTTAATTTTCATCTATTCATGTATAAAGTTTGTTCTACAACATTCAATACTAC…
MsMYB184	MSAD_303035.t1	Medtr1g043080.1	At3g23250	At3g55120	PubMedID:27117388	MSAD_277176.t1	Medtr1g115890.1			√		√		√				√		√				ATTTATAAAAAAATTTGCAGGAGTATTTTATAGTACTTTTTTATATATAAAAAAAATAATTTTTAATAAAGGCTGACCCGTTAGCCCGTGTACGACCGGGTTTGGGTAGTATATTTCAAGTCCGTTTTCCAACCTTTTTTTTAATGGAAAAAAATTAGTATTAAACAACTTGAGTAATAAATTAACATAAATTTCAATACACAATTACTATTAATGGAAATCTTAACATGTGCCCTAATGACATTAGTTAACATTTTCCAAAAAAAAAAAAAAAAAGTAGGAGCAACAATGGTATTTGGAATGAATGGGTAAACCAATGGGTCTTGCATTTCAATCCACGTATTTTCACTTATCCATGCTGTTTATATTTTATCGCAGAATCGGGAGTTGTAATATTTA…
MsMYB184	MSAD_303035.t1	Medtr1g043080.1	At3g23250	At1g79180	PubMedID:27117388	MSAD_274867.t1	Medtr2g067420.1		√	√	√	√			√			√	√	√		√	√	GAATATTGTAGAGTTTTTAAATGATAAGTTCATAATTTTTTGTTTTTTTGAGAGAGTGATAAGTTCATAGTTTAAACTCTAAAAACTAACATTATCTCTAACTAATTAATTAATACTTATTGATAAAAACAAATGATCTTATGTCATATTAGACTTTGGCATCTCTATCACTGTTACGATCATTTGGGAATATTATATGCTGCCATTAGAGTTTTATAACATGCATGTGTTGATCTTATTCGACACCATATTTTATTTCTTGAATTCTTTAATGGCAACGCGGCAATTCTTGCATTCATTATTAGTTGATGTGTCAATTACATGTCCTCTAATAAAAACATGCATACCTTTTTTTAAAATAAAATATTTAAGGTGAAGGAATAATGTCCCATGCATCTT…
MsMYB184	MSAD_303035.t1	Medtr1g043080.1	At3g23250	At1g51340	PubMedID:27117388	MSAD_257226.t1	Medtr2g097900.3	√		√	√		√	√	√				√				√	GATATGGACACAATGGTGGAAACCTTTGTTGCAAATAACATCTTGAAAATTCAACTCACAACTTGAAAATTCAACTCAGTTAATAACAACCTTTATTTAATGACATGAAGCACAACAAGTAGGATGTCAAATATGCTTGCAATGTAATTAGTAAATTGTTTTTCTGACATTGAAAACTTCAGAATGACACAAATAATTTATTAAATAGCCTTCAGTGGTAGTTAACTATCGTTGGACTAAGCGGCGGCAGTTAACAGCCACTGGGCTCCAGTGGTAGTTAACTACCGTTCATAAGATACAACTTAAAAGAAAATTGTGACATTGTAGGAAAGAGAAACACATGGGTGAGTCAAATTTCTTTCTTCAGCTTTCTTCTTCCTCGTGTTGTTGTTGTTGTGG…
MsMYB184	MSAD_303035.t1	Medtr1g043080.1	At3g23250	At1g16190	PubMedID:27117388	MSAD_293106.t1	Medtr2g105410.1							√	√			√						TTAAAATATTTTTTGGGTAGATAGACGAAATAATAAATAATTATTAAAACTCATACATAAGTGTAGAGATTGGGATTTGAATTTCGATCATGACGTCTAACCTAGTAATTTTGACATTTTTACCTATTAAATTAGGATTTATTAACACAACGAATCTAAAAAAACTACTTTATGTTTTTATTTTGCTATTATATTTTAAGCATTTTAACTATGTACAAAGATGACCCATCATCATCATCATCATCATGCATCATAAATCACATGAGAGACTTCCTTATTTTAAAAAGCCGCCATGATGATGATATTTCAGCTATAAAGAAAGTATAAATATTTTGTTTTCTTTCTTCTTTTGACTAAAATAAAGTGCTAAAACTTGATAAATGTAAATAATAACAATAA…
MsMYB184	MSAD_303035.t1	Medtr1g043080.1	At3g23250	At4g08210	PubMedID:27117388	MSAD_232782.t1	Medtr3g072900.1			√	√							√			√			AACGAAAAGGTGTTAGTTAGTTGAATTAATATGACGATTCACTATGAGATTGCTTCCCAAAATAATATAAATTCTAAAAGGTATTTGAATCGTAAATCATCAATCATGATTGAATATGGTGATGTATCCAAAATACAAAGAAACAAATACAAAATAATAATGTTGGATTTTTCTTAATCAAATGAATTGATTCTTAATCTTTTTTTTGAACAAGTTGATTCTTAATCTTTGTTTACCCATATTCACTAAATTATCCAAACTTAATTCTATGGATGATTTCCAAACTTGATTCTATTTTAAAAAATGTAAGGTTTATACTCTTATTGCATAATCATACAACAAACCTTGGAAGATACGAAGGAAAAAACACCAGTGAGATCCATTCTAATCCAATTTTTC…
MsMYB184	MSAD_303035.t1	Medtr1g043080.1	At3g23250	At3g43720	PubMedID:27117388	MSAD_300592.t1	Medtr3g079210.1			√		√							√					CTAAATAGACTTATCCCCTAAAATTGTAAGTTTCATCAATTACTTCTCTGAAATTAACAAAACTTCAATTACTTCCATGAAATTTTTCTGTTAGTGAACATGATGTTTTGCAAATATCCCCCAGAAGTTTTGCACTTATGTGCAAAATGCCCCCAAACTTAAAAAATTATATTATTTTTTTCTTAAAGACAAACAACTAACGATTAAATATTAAAGTTAACTATTAATTTTGGAGTTTGGAAAAAGAGAAATGATATTTGAACAACCATTTTTTGATAACTTTTGTGACAACTTTCTCTCTCATACTCACATTGTTCTTCTACCTTCTCTCTCTATTACTTTGATTTTTGTGTCACTATCTAAATCTTTTTATATAATTTGGTTGTATAAGAAGTTGTC…
MsMYB184	MSAD_303035.t1	Medtr1g043080.1	At3g23250	At3g13540	PubMedID:27117388	MSAD_287819.t1	Medtr3g083540.1					√	√		√			√	√			√	√	ACCAGTCTAACCACAAAAATGGTTTTGTGAAAGTAAAACACAGGAAGTTGAAGTAACTTAAGATTGCAAATGCTTTTATTATTCTCCAAGCTACCTTGATTCAAATCTCTTCTACTCTATATAAAACCATCCACTATCCCTTTGCTTTTCATAAAATCCAAAAGCAATATACAAATCTATTCCTTAGCTCCTAAAATTCATCAAAATGGCATCAAGCAAATCCTTAATCACAACTTAATTTACTTCTTGTTGTGACAATGTCAAGCATGAACCTAGAAGCTCGTCATCTTTTGCAAACAACAACACAACCGAATTTGCCTTCAATTCCAAATATGCCTCAAGGAAATCTTCCTCCATTGCCTACTACCATTCCATCTCTACCTAAGCTCACTATGTCTA…
MsMYB184	MSAD_303035.t1	Medtr1g043080.1	At3g23250	At4g14090	PubMedID:27117388	MSAD_316009.t1	Medtr3g084520.1					√		√		√		√					√	ATAATTTATATGTTTTGGGTTGAATTTTTATTTTCCGATTATATTATTTTTTTAAACTACTCTAATCAACATTTTGTTTTTTTGTATAATATTAAAAAAAAATTAATTAATTTTTTTTGTTAAATCTCATTCTAATATAAACAATTTCACAACAATAAGAACAATACAAATTAAATAATAGTGTTTTATCCCCTGTAATATAAGTCAGTTTCAGTTTTCCCCCTTGTAAAATATTTTTTTTGGATTCCGTCCTTATAATTTGAAGATTTTTTGGTTTTAGACCTTCATGAAAAATTCCGCCCCCTGGAATTTGAGAAAATTTTGGTTTACCCCCCCTGCAATTTGAGCAAAATTTGGTTTACACCCCTGTTAATTTGAGAAATTTTCGGTTTTACCCCC…
MsMYB184	MSAD_303035.t1	Medtr1g043080.1	At3g23250	At4g32400	PubMedID:27117388	MSAD_255111.t1	Medtr3g107510.1					√	√	√	√				√					TTAAACATCACATATTCCCTAATAATTTTCCAAGGTTGTATAACTGCAGAAAAAAAGCAGATAACACTCTTGAAGGAACAACTTGGCAAATCAAGTTTGAACTAAGTGGTGTGATTCAAGGAGCTACATATAAACTCAGAGTTGCAATTGCATCTGCAACATTAGCTGAATTGCAGGTAAACTCCTGTTGTATGTAACATGATGGTGTTTCACCTTTTGAATTTCGTGCTGACATGTATAAATTGCCTGTGAAGATTCGAGTCAATGATCCCAATGCAAGGCGTCCCGTATTTACCACTGGATTAATAGGAAGGGAGAACTCAATTGCAAGACTAGGAATTCATGGACTCTATTGGCTGTACCATGTGAACATACCAAGTTCTCTTCTTATTGATGGCA…
MsMYB184	MSAD_303035.t1	Medtr1g043080.1	At3g23250	At4g32890	PubMedID:27117388	MSAD_281162.t1	Medtr3g109760.1	√		√					√			√						TCAAATTTTGCATTGAAAATGGTAAAAAAAAAAAAAGTGCACATTTAACTTTTAAAAGTCAATAAATTGTTTTTTTTATTGAAAAAATTCTATTTTTTACTTTCTTAACTAGTGTCTCGGGGAGTGTCTCGGAGACACTAGTTAACATGACCCCTAATACTCCCTCCGGTCCTTTATACAAGACACAAAAGATATAAAACATCAGGACCAAAGAAATACATTGAAAATAGTTATCTTCATTTAATACACCTCTACGTTTTAAAAAAATCATGAATACCCCTAAATTAATTACTCTTTATTGCACCAATTTACTTACTTTTAATATTTTCTCTCATAATAAATAAGGACACAAATGAAATTTAACTTCAAACATACTTAAAATTTGGTCAATATTTCTTA…
MsMYB184	MSAD_303035.t1	Medtr1g043080.1	At3g23250	At4g19645	PubMedID:27117388	MSAD_295866.t1	Medtr3g450410.1		√	√	√		√	√	√				√	√				CTTCACAAGGGAGAATAATTGATATAAATCAAGCAATTGACCATCACTAAGTATCACCAGCACATGCCTCACATTGCCGTTACTTCAATTCTCCTTTAGGTCAACCCAAAAAAATTGAGAAAACAAATATTTTTGTTTACCTTTGACATGATCATCACTATCAACAAGACAACCACCGTTTCCATGACACTCGGTAAAAGTTTCAGCTTCAAGGCGATCAAGGAAAGACCCATTTTCCAAGGACTTTTGACTCTCTACTTCTATACTAGATATGTTTTGAGTTTGATCACAAAAATATAGGAGGCAAAAAAAAAACGAGCTTCCTCTTTTGTATATATTGATGGTACAAACAGAACAACAACTTACAGTGAAAGCTAATCAAGATATAACATTTACATA…
MsMYB184	MSAD_303035.t1	Medtr1g043080.1	At3g23250	At5g22020	PubMedID:27117388	MSAD_242022.t1	Medtr4g050190.1				√			√	√						√			GAAGAATGCTATCCCTAACTGGGATTTCATTACTCGTGGAAATTTTAGTTCAAAATAGATTTTAATTTTCTTAGTAGTTTGGATTGGATAATGATACTACAAACTTGCTCCCTTTATTTGACCATATTTGTCATTAGATGGGACCAACATTAGATTTGTTGACTCTATGGGAAGCTTGCATGCAACTCTTTGTTTATGAATGGAGTAGAGCCTATTGCTAAATTACGAACAACATTAGTTGTATTTGACCTTGTTAACATCTTTTAGCTTCAATTCTTGCACGTGATCATAGAAAAGTGTTAGCTTTCATGTCATGTTAAGTGCTTTTTCATTAAAATAGAGTTTGTTTAATATGTGCAATATTGTTATATGTTATTTCTCATCACCTATAATATTAAA…
MsMYB184	MSAD_303035.t1	Medtr1g043080.1	At3g23250	At1g10850	PubMedID:27117388	MSAD_331741.t1	Medtr4g074080.1	√		√	√			√				√	√					AAATAAGTTATAAGCTAGCTGATTTGTGTTACCAAATACAGTGGTTTTTGGTTTACTTCTGTAAAATAAATTTGTTTAGATATTAACTCTGTGATTTTAAGATACTTTGATTTTCGATATTTTTGACACCAAATTTCAAAATTTAAGATACTTTCGTCGATTGTAATTTGAACAAATTTCAGTTTACCTCCGTGTCATATCATCGATTTTGTACCGTCAAAATTTATGAAAGTCTAAACCAAACAATCTTCAAATTATAGAGTTTGAATCTAAATAATTTTTTTACAGGGATAAACCAGAAACCACTAATATTACAGAGGGTAAACCAGAAAAACCACTAATATTACGGGGGTAAACATGTGTTAACCATTTTTTTGTTCCTATAAATATTTTAGGAAT…
MsMYB184	MSAD_303035.t1	Medtr1g043080.1	At3g23250	At3g19720	PubMedID:27117388	MSAD_251220.t1	Medtr4g094300.1		√			√	√	√	√	√	√		√					AAAAAGGTATTTGTCCCCTCTTTTTTGCTAACATGGTATGGCGTGGCAGTTGCTGACTGTGCAACTTTTGCCACGTGGCAGTCCATGTCATTAAAAATTATGATTTAAATTCTGAAATTTATTTTTTAAAATTAAAAAAACTGAAAAAAAAATCATAAAAAATTCCAATATTTTTTTAAATATGAAGAAAAAAATTGGAAATTACTTTTTTTTTTACATGTGGAAATAAATGATTAAAAATTAAAATTAAAAATTATATAATCTCAAAATTTATAACTTTTGAAAATATAATTTTCAGTATTTTCGAAAGAAAAAAAAGTAATATATAATATTCAAATTAAAAAAAGAATTATTTTTCGAAAATTTAATTTTCACCTTTTTTTTTCAAAAATTTTACTT…
MsMYB184	MSAD_303035.t1	Medtr1g043080.1	At3g23250	At1g11990	PubMedID:27117388	MSAD_317481.t1	Medtr4g132590.1			√				√	√		√	√	√				√	TTATTTAGTAGCACAGAAATTAATACACAGCTAATCAGGGTCGATTTTAGCATAAGGTATAGTCCAAAGACACCAAACTTTTACCAGATCTATGAAAAAAACATACTTATGATGACAATTTGTAGAACTTTCAACACAATGGTAGCCATCACTTATTTGTTTTAGATTAAAAATAATTAAAAATGTAATAATTTCACTGAAATATTGATACTAGTTTTAAAAAAGATTGATTCTAAGTTTTTTAATACCAAAAAAATTACTTTTTCATAGACATTTCATGTACATTTTGAATGAATAAAGCATTGACATATATAGGGGAATCTAAATCAGATGTACCCCTCATTATTGGAGTAGGTTCTATCACAATCATTTATTTACTTTAACTATTTTTTCATCTAA…
MsMYB184	MSAD_303035.t1	Medtr1g043080.1	At3g23250	At3g03550	PubMedID:27117388	MSAD_270464.t1	Medtr5g030010.1			√	√			√	√					√				CCTTTTTATCAGGTTAAATATCTTTTTATACCAATTATTTGTTTTAATCTCTCTTAAATTTTCCTTAGATTTTTAGTTTTTTTTCTAAGTTTTTGATCAAATGCATCTAAACACCCTTTAAGTTTTTCGTTTTTCCTAAATGATCCTTTAAAGTCCTTTCCTTTTATCTTCATTTTTTTGTCCTTTTTTAAAATAAATTTATATGTAAAATGTACATTTTTTTTTAATAAAATTAGGGTGAATTGTACACTTCTTAAATTTTACTCTGGCCACCTCTCTAGTTTTCAACTAAACACTAACCTCCCCTCCATATAACACCGTTAGCTCCAAGTTAAACAACCCTCTCAAAAATTCACCATTTTCACTTACTCAACAACATTGTCATGTTTCCTCCGTAGA…
MsMYB184	MSAD_303035.t1	Medtr1g043080.1	At3g23250	At3g55780	PubMedID:27117388	MSAD_301469.t1	Medtr5g081720.1			√				√	√				√					TTTTAAGAGAAAATGTCAAATAGGAAGAAGTTTGGTTGTTTTAACAATTTCAAATAGTGTCCAATGCTCAGTCATGCAAGAAAAGATGAACATATCAAATAATTGTTGTAGGTTAGGCTCTTTTTTTTTTTTTTAATAAATTGTTGTAGGTTAGGCTTGTGACCAAACAATATTGTCAAATATGGAAATAAGAAAGAGACACAACATAATTGCATCAGTTTAGGCATTAACCGCTATATAACTTTACAAGATTTTGACTCTTACCGTTTTCAACTCTTTGAATTAGTAATATCTCTCCTAATTTTAGAAAAACATTACTCCTTCCGTCGCCTAATTAACTCCGACACATATATCAATGCATTTGATATCTTCAATTCTCAACTAAAATATTATGAAAAT…
MsMYB184	MSAD_303035.t1	Medtr1g043080.1	At3g23250	At3g13220	PubMedID:27117388	MSAD_309376.t1	Medtr5g096390.1							√	√						√			NNNNNNNNNNNNNNNNNNNNNNNNNNNNNNNNNNNNNNNNNNNNNNNNNNNNNNNNNNNNNNNNNNNNNNNNNNNNNNNNNNNNNNNNNNNNNNNNNNNNNNNNNNNNNNNNNNNNNNNNNNNNNNNNNNNNNNNNNNNNNNNNNNNNNNNNNNNNNNNNNNNNNNNNNNNNNNNNNNNNNNNNNNNNNNNNNNNNNNNNNNNNNNNNNNNNNNNNNNNNNNNNNNNNNNNNNNNNNNNNNNNNNNNNNNNNNNNNNNNNNNNNNNNNNNNNNNNNNNNNNNNNNNNNNNNNNNNNNNNNNNNNNNNNNNNNNNNNNNNNNNNNNNNNNNNNNNNNNNNNNNNNNNNNNNNNNNNNNNNNNNNNNNNNNNNNNNNNNNNNNNNNNNNNNNNNNNNNNNN…
MsMYB184	MSAD_303035.t1	Medtr1g043080.1	At3g23250	At5g39520	PubMedID:27117388	MSAD_315427.t1	Medtr6g012830.1			√	√	√	√	√	√				√					ATATTACACCAAGGTAAGCTTGCCAATGCCATTTAACTCAGATTTTAATTGTCTGAGTTTTATAATCCCTCATTGCATTTATTTTCTTTGATCTTTATTCTGATGAGTGGACTGAAATGTTGGTTGTGACTTGTCGAATGTAAATTAACAAAGTTGATACTCAACGTCGAATAGCAGGTTGTAAAACTTGAGCAAGGTTTGCTTCGAGGTTCAATAATTCACAGTACTATCTTGTCAAGTGAGTGAGCAGCATTCAACTTGTAGTGATGATTACTAAATTTGTGTGCAGGATTTTAAGGGCAAAGTTGAAGGTGTCAATGTTAAACCTGTTGACACAACTGGTGCTGGAGATGCATTTGTTAGTGGGATTCTCTACAACATAGCTTCTGACCCAAGTAT…
MsMYB184	MSAD_303035.t1	Medtr1g043080.1	At3g23250	At5g13280	PubMedID:27117388	MSAD_316662.t1	Medtr6g033260.1				√			√	√			√		√				TGTTTAGGCAAAACAAATATTTTACCATTTCAGACTTTCAGTGAGCTAGTCTAGTGGTGATAAGTGGATTTGATTGGTTTTTTTTTTAGGAGAATCTCAGTTCTCTAGAACTATGTGAATTTTGATCCTTATTAATTATTGGGATGCCACAGTTTTTTGTACTCTTGTAATCCTATTTCTTAATTAAAGAGTTTTGCAATATGTTTTTTCGATGATTACATGGATCAAGGAAGCATGTCTGTCAGATTCATTTGAAAAATTGAATCTTCAATTCAATTTAACTGAATCCATAAATTATACATTGATCTGTCTCTTGTTTTATAGTGCTATTTTTTAGCATTGAAAATGGTTCTTCTGACTTATATGCAATTTTGATATAATAAGATAAAATAGAAGTTT…
MsMYB184	MSAD_303035.t1	Medtr1g043080.1	At3g23250	At1g20230	PubMedID:27117388	MSAD_308113.t1	Medtr6g075280.1	√					√	√					√	√				GATATCATCTTATTCTTATCCATCATCATTTATATTATAAGAGAAATGATATTTGTACATCTATTTTATGATAATTTTTGTATAACATTCTCTCTCATATTCACATTATCTTCTTATTCTCTCTCTTTCTTTTTCTCTCTCTATTGTTTTTGACCAATAAAAAGAGAAAAAAGATAGATTGTCACAAAAATTATCACTAAAAGATTGTTCAAATATCATTACTCTTCATATAATTCGGATCAACTTCCTTGCTCTCATTGTTATAGAACATAAAACAAGGGTTTTATTTCCTCTCTCATATTAGATGTCCTATTTAACTCTGATATACATATCAACAACATATATATATATATATATATATATATATATATATATATATATATATATATATATATATAT…
MsMYB184	MSAD_303035.t1	Medtr1g043080.1	At3g23250	At4g29670	PubMedID:27117388	MSAD_232977.t1	Medtr6g092700.1	√	√	√	√		√		√	√		√	√					TCGCTTCTTTCAATTATTTCATTTATCTTTTCCATACCATTTATTAAGGATAATTTTGTAAAATAACTTATAATTTCTCTTCCCCACATAATATTAATTACATTTCTTAATACATGTGAAATGGTCAAAACGTCATACAATTTGGGACGGAGGGAGTATAAACAAAAACAAACAAAAAAAACACTCTTTATGAAAGTGGTCTAAATGTATTTAAGTCGTCCTAAAAAATCATATTTTATTTTAATTTGACCTTTAGAAGTGCTTTGGAAAGTGTTAAAAACATTTGAGTATGAACAGTTATAGTAGACATGCATAATATATGAACAGTTATAGTACACATTGCATAATATATGCAGGGTAAGATTCAAACCCCAGACATCTTAATTATTCACCTTAAAA…
MsMYB184	MSAD_303035.t1	Medtr1g043080.1	At3g23250	At3g02210	PubMedID:27117388	MSAD_239417.t1	Medtr7g015950.1		√	√				√	√									ATTTTTAATTTATCTGAAGATGATATATAATTTAAGAGACATTCTTCCATAGTCATAAATACAAATGAATAATGTTTGATCACACACGTAAAAAAACTATTTTTAAAATATCAAATCATTTTATTATCAATTTCTTTTTCATTATTAAAAAAAATCTTTTAATATCCATGTGCCTAAACATTATTCATTTATATTTGTGACTATAAAAGAATTCCTTTTGATTTAAAAAAGAAAAAAGAAAAAAGAACACTACTACACTGATTTAGTCACATAAGATCCGTACATACATATTTATATTTATATCGTCCCTCTAACAAAAAATACATATTTATATTGTCATTTTTGCTTGTCCTTGACGATTAACTGTCGCGCCACTTTATATCATGAATTATTATTTGT…
MsMYB184	MSAD_303035.t1	Medtr1g043080.1	At3g23250	At1g05850	PubMedID:27117388	MSAD_245591.t1	Medtr7g021640.1			√		√		√	√									TATAAGAAATATTGACCAAATTTTAAGTATGTTTGAAGCTAAATTTCATTTGTGTCCTTATTTATTATGAGATAGAATATTAAAAGTAAGTAAGTTGGTGGAATAAAGAGTAATTAATTTAGGGGTATTCATGATTTTTTTTTTTAAATGTAGAGGTGTATTAACTGAAGATAACTATTTTCAATGTATTTCCTTGGTCTTGATGTTTTATATCTTTTGTTTCTTGTATAAAGGACCGGAGGGAGTATTTTTCAATTGTACCTACAATATAACAAATATTATGTCTTTTAAAAAATATATAACAATTTTATTAAAAAAAAACTTTATGATTTTAATTAAAATTATAGGTATAGATAATAAATATTTTACACTTTCTACTATCTTATATTTTTCAATTTT…
MsMYB184	MSAD_303035.t1	Medtr1g043080.1	At3g23250	At3g09080	PubMedID:27117388	MSAD_267497.t1	Medtr7g066750.1		√	√	√			√				√						TTTTCCTTATAAACTGATAAATCAAACAACCTCCTAAACCTGTCCCTAAGTGGGACCGCCCCCACCCAACAGTCGGACCAAAAATAGGTTTTAAAGTCATCTAAACACTTACACACACAAAATATTAAGGCTAATTTAATTTATACATTGTCGATTGAGTTGGGTCACATACAAAATTGATTTGATCTAATCAATTTGAAAGGAACATACATGATTTATTCACTATATATACTCATTTATTATAAAAATAATAGGCAAAATTACTCTCATCATCCATTAAGTTAATTTGAAATAACAATTTCATTTTTTATTTTTTTCTCACGTTATTTTCGTTCTTTTGGTCAATTGGCATATAAATTTTCAAGATTCAAATCTACGATTTTATTTCGATATGAACCC…
MsMYB195	MSAD_306780.t1	Medtr4g100630.1	At5g47390	At2g24550	PubMedID:27117388	MSAD_284483.t1	Medtr1g009640.1		√	√	√		√	√	√			√	√		√			ATGAGGTGTACAATGGAGTGTAGAAATAAAGAGTGTTCATGTAACATTTTCCTTTTTTTATGCTTTTGGTGTTGTCTTTGTCTTTCGACAACATTACTTTTTTAAGGGATGTACACTTTTTCAAATCATTTTTCAATTTTAATTTTCTAACATTTGTGTTGTGTTAGAGGATAGTGTTTTAGCATTTTAAATTTTTCTTGAAAATTGCTAGATCTGTTTTTGAAAGTTATAAAAGAAAAAGGTGAGGGAAATATTGGATCTACATTCTCTTATTTTTATTAGTTGAAGTGAAAATGAAAACAAAAAACAAGAGAAATAAATGAGACTTTACCTTACAGTTGAGGTAATTGGTAAGCTGTTGGAATGATATAAGATTGAATTTGAATGTGGTGTATGAAG…
MsMYB195	MSAD_306780.t1	Medtr4g100630.1	At5g47390	At1g64520	PubMedID:27117388	MSAD_270866.t1	Medtr1g016750.1			√				√	√			√						TTTTTTAATGACATCAACAACGATCATTATTATAGAAAAAGTTGTTTAAAGGTATAATTGAGATAACAAAAAGTAACTATAAATATATTCATTTAGTTTGTTACACTTTTTAAATGATAAAGGGAAAAAAACCAAACATATATATATATTCATATCATGTTTGTTGCATTTTTTTAATATTTAAATTTATTCTTAGTTATTTGTATTGAAAATTGAGGACATTTTTTTGAAAGAAAAATCCAACCCAAAAATACTGAAAGGGTAGTTTTCTTTAGGGTTAATAGACCTTTACCTCCTGAAAAAAAAAAAAATTGAGTAATGATACATAGACACCCTTTATTCCCATACACCCTTGTACACCCCATGCATTAGGAAGAGAGAAGAGGAAAGAAAAGATAA…
MsMYB195	MSAD_306780.t1	Medtr4g100630.1	At5g47390	At1g14686	PubMedID:27117388	MSAD_326897.t1	Medtr1g033880.1			√				√			√		√					AAGTTAACCTCACTATTGTACGTACCGTACCACATGTTTGTTATTAATCATAAGGTCCCACTCTCTGAATTTTTCTACTTCCTAATTTGGCAAAAGCATCTGAACAGTAGTAACATGAGTTGATATCTAAATCATATGTAAATTAATAGGTATCCCTTGGATCAATAAGACTTTTTTGGGACACAATAGTAAGAATTTGATTATTCCCAAAATCCTTCTAATCAAACAGTTTTCCAGTCAAAAGATAAAAATAAAAAGTGAAGCCACTAGGATCTCCTCAGAAACCATGTAAGTAAAAGACCACAAAAATAAAATATAACATTCAAAATATCTTTTATTTAAATAAAACAAGTTTGTGGGTTCTTTTATTTTATGGCCTATGTGGGGTGTAAAAGAGTT…
MsMYB195	MSAD_306780.t1	Medtr4g100630.1	At5g47390	At3g23310	PubMedID:27117388	MSAD_240079.t1	Medtr1g075880.1			√				√	√	√			√					GTTGGTGAAGCAGCGGTGACAAAGACCCGGTTATTTTTGTTTTTCTAAAATCAATTTATTAATTTTTTTTTACGATCACACGTGTTTAAAAAACATTGTAAGTAGATTTTTGTCAAAATCTGATTGGGGATGTTGTGATTGAGCTTCAAAATCAGCTCAACTTGCGTGCATGAGTTTTCAATTGCTATTATCATTTCACAAGAAGATAATAGTGAGGTTTCAAAATCAAACAATCGTGAAACTTAAGAGTCAAGAGTGCATTTAAGCCCTCATATACAAAATTGTGGATAAATGAGTGTTTGTGTGTGTGTGTGAATGAGATACATGAGATTTAACAATGTTGTCATGATCTTATTCTTAAGATCGAATAATAGATCCTTTATCATATAATTTTTGTTT…
MsMYB195	MSAD_306780.t1	Medtr4g100630.1	At5g47390	At1g64720	PubMedID:27117388	MSAD_300247.t1	Medtr1g078030.1		√	√	√			√	√		√		√			√		CAGCGGCGACAGGATAAACGCTGATGTTCCATTTTTATGGAAAGTGAAAAAATTCCTAAACATTGGACCCGAGCGACGGTTGAAAGAAGCTGTCGCTGAAGTAAGGGGGCTCGCCACAAAAATTGTTAGGGAAAAGAAAAAAGAGCTTAAAGAAAAGGAAACCTTGGAATCGGTGGATATTTTGTCGCGATTTTTAAGTTCTGGTCATTCGGACGAATCTTTTGTAGTTGATATTGTGATAAGCTTTATTCTTGCTGGGAGAGATACAACTTCAGCTGCACTCACGTGGTTCTTTTTGTTAATCTCTAAGCATAGTCATGTAGAGAATGAGATTCTTAAAGAGATTACTAGAAAATCAATGATAGTTAGTAACGATGAGGTGAAGAATATGGTTTACAC…
MsMYB195	MSAD_306780.t1	Medtr4g100630.1	At5g47390	At1g09900	PubMedID:27117388	MSAD_258079.t1	Medtr1g080110.1			√				√	√			√						AAAATAAAACTAAAAAACACTTCGAAGTGCAACAACTATGTATCAAGTATCCAATAAGTGATTTTGTTAACAACAATAAGGAAGAGAAAAATTTGGAGCATTGTTGATTTTCTTCCCAGACGTTGACCCCTCACCAAGCTTCTTACAAGCAGGTGGGGTTGGGCTAAACTAAGTATATTGACTAATTGTTGCAAATCACTTAATCTCATACTATTTTTTCGATTAAAGAGTTAAATAAGTTTTTGATCTACAAATATATTTAGTAAGTTTTTGTCCTTTTAATTTTTCCGTCACGAATTTTAGTTTTTATTTTTAAGTCAACTCATATGTACTTTTTATTTTTAATAAATTTTTACGGAGAAATTTAAAATATTATAACAATATTTTCCACAAAATTAC…
MsMYB195	MSAD_306780.t1	Medtr4g100630.1	At5g47390	At1g09570	PubMedID:27117388	MSAD_284037.t1	Medtr1g085160.1			√					√		√							CTTTGTTTGAAATGTAGAGCTTTTTAATGTGTGAAAAAACTAGAAAAAAATGCGTGAAAGAAGAACTTTAAATTTAGTGAAATTGACAAAGAACAAAGGTTGTCAAACCTGGTGATAAGTGGTTCTAACATCAAAAGACATTCATGCCCCTCTCAATCCAACTATACACCTCTTTATTTGCGTATAGGCTTCCACGAATAATTACTTTTCCTAGAAAACGCTAGAGTAGACCGTAACTCAAAAACAAAGCTACCATAATTTAATATAGGGTTAAATATGTTTTTGTTCCTTATAAATATGTCAACTTTTTGTTTTAGTCCCTCTAAAATTTTCCTTCAACTTTTAGTCCCTATAAAATTTTCAATCACTACTTTTGGTCCCTATTTTTAATTTAATTTT…
MsMYB195	MSAD_306780.t1	Medtr4g100630.1	At5g47390	At1g17030	PubMedID:27117388	MSAD_283924.t1	Medtr1g086170.1	√					√	√	√	√		√	√	√			√	CATTTTTGCAGCTAATATGGCTTTGTTGTTTTTCAATGTTGTGGACAGAAAAGAGAAACAGACTCTTTAACAATAAAGCTAAGGCTCTGTTTCCTGTAGGAGACATGGCTTTTTTTTTTTTGGCAAAATAAATATGAACCATTGGATAAAAGTAAATTAACTTTGGATCAAAATGCTTACTATATACCTCCCACACCGAATTACTTTCTTTTATTCTAAATTACTCTTCTCTTTACTTCTAAATTACTCTTCTCTTTTATTCTAAGAAAAAAAAACAGTCATGTCTCCATCATTATCATCGTCGTCCATAACATCATCATGGTTAGACTTAGAGACATAATCTCGGCGCCGTTTATGGTAGGAGACTTGAATAGGTCTCCCACGGGAGGAGACATTAAA…
MsMYB195	MSAD_306780.t1	Medtr4g100630.1	At5g47390	At3g57140	PubMedID:27117388	MSAD_311346.t1	Medtr1g087300.1	√			√			√	√			√					√	ATCTTCAGAAGAGATAAAAATTGATGGCTCGTGATACTATTAGATATGCTCTAACAAAACCCCAAAATAAAAAAATAATGTAGAGTCAAAATAGTGTATATCATGTGTATTAACATTATAGAAACATGTTATAATTATTCTTGAGGTACACCCAAACGAATTTAGATCTCTTATGTTGTTGCACAATTATAATGGATATATAGAATCTTTGTCTACACCAAGACATGCGTGATTTGAATCTCTCACCTGATGTAATCCCTCTCTTTCTCAAAAAACACTGGTGATATTAATTTTTAGTGACATTAATACATTTTAGATAAGAGAGAAAGATTGATGAATAACTAAAATAATTTATTTAAATAAAAAAATAATAGTTGATTGAAAAAAATAGAAACAATA…
MsMYB195	MSAD_306780.t1	Medtr4g100630.1	At5g47390	At3g54830	PubMedID:27117388	MSAD_236447.t1	Medtr1g094620.1		√					√	√	√		√	√				√	TATCATTTAGGCTTTTACCCAACAAAATCATATCAAGCAATTTTATTTCTCTTACATAGTTCATATAAATTGTCACATTCATTTAACTTTTGTCACATCATGCAAGCTAAGAGACAAATCGATCTATTTTGATTGACGTGTTACACTTTCAATGACAAAATTGTTATTTTGTAAATTAGACTATATTTGACTTTTCTTTTTTGTGAGAGACTAAATTGGCCCGCAAAAAGTTTGTTAATGACCAAGTTAAGTCTTTACTATATATTAGTATAATTTTACTTTTTAAAATAATTTAAATATCTCAACTCAACCTTTTTTTTTTTTGTACATCTCAACTCAACTTCATCTTTTTCTAAACCTTTTTATGGATTAGGATTGTGTGACTTTATAGAAGAAAAG…
MsMYB195	MSAD_306780.t1	Medtr4g100630.1	At5g47390	At1g71880	PubMedID:27117388	MSAD_303637.t1	Medtr1g096910.1				√			√	√			√						TAATAAATCTCAAAATATGATTTTAAAATTATTTTTTTAGCTTCTGTCAAATAAAAAGAATGAAATTGAAAATTGACCATTGTTTTCTTAAAATCGACGTAACTTTTTGTTATGAAGAATTATGAGAAAATCAATGGTGGTTAATTGGGTTAGATATGACCAACTAGAAGGTGATTAGGGCTAAAAAGGAGCTTTTAGTGACATAACAAAAACAAAAAGGGTGAGACCCTTTACGGTCATTTTCTCCTCGGAACATGCCCAACACTTTTAGCTGGCAGGACCCTTCCCTTTGTCTACTACCCCCTCCATATAAACTTATAGGCATTAAATTTCTCTTTTTCTTTTTCTTATTCCTAGGAAAAAGAAGAGAATTATCTTATCCCAATTATTAAAGTTTTT…
MsMYB195	MSAD_306780.t1	Medtr4g100630.1	At5g47390	At5g43830	PubMedID:27117388	MSAD_214864.t1	Medtr1g102680.1		√	√	√	√	√	√	√	√			√					TAGTTGGGTGTGGGGTTCAATTTAGACGAAACAAATTTTTAACTATTGTTTTTTACAAGTGAATAAATTAAGAACAAAAACACAAATTGTATTTCTTGTGTTTTCCTCTCAAAAAAAGAAATAGTCTTGTGTTTTGTAACCATAAAAGAAATATTGGTAGTCTTGTTTCGGGAGAAAGAAAACATATTTGTGTGATCTCAAAATGCTTTTGAAATGATTAATATGTATCGGTTAGTGATTTGTAATTTACCTAAAACTTCAAAACAATTAAAAAAATAGACATTCTGTTGCATCTTAGTGTTAATTTATTTTTAAGAAAAACTAACCAATTAATAAGATATTAATCACAAAGGTTTAATAATTATACAACCACATTTTTTCAAAGGATCCATACATCTA…
MsMYB195	MSAD_306780.t1	Medtr4g100630.1	At5g47390	At5g19260	PubMedID:27117388	MSAD_322197.t1	Medtr1g105360.1			√					√	√		√	√			√		CATGTCAACAAATAAAAAATTTTAAATCATAAACCATTAAAAAAATTCAGAAATTAGAACAAAAAAAAGAAAATTGAAATCTCTATAAGAACGTTAGAATCCTAATTCCCAAATTTAGGATGCACTCAAATCCTCTTCAATTTCTTCCATATTTTCCTTCTTTCATCCTCGTTATTGAAGAAATTAAAAAGGCTTCAAACACATGAGATATTTCATTAGGGATTGAAGAAATTGAGAAGGCTTAAAAAAATTAGAATTTGCTCCTTCATTTATTTCTTCTGTATCGAAGAAATTGAGAAAGCTTTGAATATGAATGGTAATTTCTTCTTTTGTTTCAGCTAAAGCCACAAGCACGAGATCTATTGAAAGTTCATGGGATTCATCTTCTAAGTTTTTTTG…
MsMYB195	MSAD_306780.t1	Medtr4g100630.1	At5g47390	At1g25450	PubMedID:27117388	MSAD_293510.t1	Medtr1g110930.1	√	√	√				√	√	√	√			√	√			CATGACTTAAGGGCCAATTTGTATATAAAAAAACTTAAAGGACCAATTTTAACAAAAATTTAAAGAACTAATTTGTTGTAGACATTTAACCTAAAAGACCGCGGAAGATATTTGGCTAAAAATAACTAACTTTCGTTTCCAAACATTAATTTAAAAAAGTTTAGAAGGAAATTTTTCATTAATGATCATATCACAACTATCTTATAATTCGAACCATGTTCCTTGAAGTTACAAAATCAAACTAAGCACTACTAATTGCTACTAACACATATTGCTCACAATAACGACAAGAGTTGAACTTACGTTTTTACGGATAAAGATCGACTATTTACCAACTAGATCAACCTACACTTTTACTCCACAACCAAACAAGAAAAAAAAAGTATTGTTTTTTTCTTC…
MsMYB195	MSAD_306780.t1	Medtr4g100630.1	At5g47390	At2g39470	PubMedID:27117388	MSAD_277132.t1	Medtr1g115410.1						√	√				√	√				√	CTAACACGTCCGTCACCACCACCGACCACCCCGTCACCACTAACACTCCAAACAGCCGACACCCTTACCACCACCACGTCACCATTCAACACCACGACCACGACAGAGATGGTACGAAACCACAAACACAAAGAGATGGTAAACTACCCAATTGAAATTTGGTAGGTATTAAAGATGATGAAACACGTGAGCACCCCAAAAGTGATGACAAACAAATAAAAACCACCGAATAAGTGAAAAGCCAATCACACGTACATGATGCAATTAGCAAATGAAAGTGGTTATTGGTGAATAGGGCTATGATACATGGCCAACGAGTTCATAACCTTGAACATGTTAACTTACGTCACCAACGCACACAACACCACCACCTCAGTACCACCCCCACCGCCGCGCCTC…
MsMYB195	MSAD_306780.t1	Medtr4g100630.1	At5g47390	At5g46090	PubMedID:27117388	MSAD_239947.t1	Medtr2g014550.1					√	√	√	√	√					√			ATAAGGTTAAATGCACATCTTTTAAGACACTTATTTCTATTTTAAACTACTCCATCTGTTTTAAAATGAGCGTCGTTTTAGCAAAAAAATTGTTTCAAAATAAATGTCAATTTTAGTTTCTAATGCAATAATAATTTTTTCTTTTTAATTGTATCCTTTAATTAATACTATATACATTACTATTTGTGCAGACGTTTCCACCCAATAATGCACTTTTTAATATGTGTGTAAAAACTTTAAACGACATTCATTTTAAAACAGAGAGAGTAAGGTTTAGATCAGTTTTTCTTGTTGTGCTAATGCAAATAAATTATGAACAAAAGTTTTTGCGAATTTTTAATTAAATTAATTGATTTTAGTATGCACAAATAATAAATATTTTGCACTTTCATATAGTAA…
MsMYB195	MSAD_306780.t1	Medtr4g100630.1	At5g47390	At5g19010	PubMedID:27117388	MSAD_232019.t1	Medtr2g021330.1					√		√	√			√	√			√		AGCGGGATTAAAATGAAAATTTGATATAATCATAAGGACCAAAAACATATTTAATCATATATATATATATATATATATATATATATATATATATATATATATATATGTATGTATAATTTTTTTTGGTAAAGCTTGTAATTTGTTTGACCTATAATTTTTTTTACAAACACGCTACATAAAATTCAGGGATTAATTTTTATGCATCGATAATTTACACATACATTCAATCAAATCATGACCAATAAATATTTTTTGAGGTATCTGATCAAAAAAGGTGGTATCATAAAATGATTTGATTGAGTGCGTATAGAAAAACTTTATGCCATCAGGATATACAAATGAATCTTTTTGTTATAACACTTTTGACAAGATAAACAATATTCATTTATTCAAACTGAT…
MsMYB195	MSAD_306780.t1	Medtr4g100630.1	At5g47390	At5g19140	PubMedID:27117388	MSAD_332176.t1	Medtr2g022520.1	√						√	√	√			√	√				GGCAAACAACCACTTCCACTTGCCATTATATTGGGGTCAGTGTCACTTACTTGATTTTATTAATCTTATAGTACATATATAATTAGTATATCATATGATATGATGATGATATAAACTGAAAAATGATACTTTCAAACTTGAATAACCTACTAGGAGTTCATACTCAAGCCTCCAGTCATAAGGTTTGGAGTTCAATAATTCTTATATTATTATTTCATATTTTCAACCCACTTGGGTTGACCCGGTGGCATTACCTTGGGACCTGAGAGTTTACTCATCTTCAAAGTTTCATGTACGATTCTCTCTAGTGTCAATTTGAGTTGACTAATTTAATTTTTGAAAAAAAAAACATATTTTCAAAATTATATTGCATCTCCTTTAAGAAATAATTATATTGTA…
MsMYB195	MSAD_306780.t1	Medtr4g100630.1	At5g47390	At4g16500	PubMedID:27117388	MSAD_304054.t1	Medtr2g026040.1					√		√								√		TTTATCATCGTTATCAAAATTAATCCATGTTGTTAATTCTCTAACGGAATGCTGATGTGACAATTAGCGGGTCCCAATTATTATAAGGTTAAATATGTTTTTAATCCTTACATTTTGCGTGATTTTGAAAAATAGTCTTTACATTTCAATAAATGTTTTTAAAATCCCTAAAATCGTAAGAACTATTCTTCAAAGTCACGCAAAATGTAGAGATCAAAAATATATTTAACCCTAAAATAATTGGGACCCACTAATTGCCACATCGCATTCTGTTAGAGAATTAACAAGACTAATTTTTATAACGGAGATAAAATATAAATATTTTAAAAACATTTAATAAAATGTAGGAACTATTCTTCAAATGAGTGCAAAATGTAAGGATTAAAAACATATTTAAAT…
MsMYB195	MSAD_306780.t1	Medtr4g100630.1	At5g47390	At1g31330	PubMedID:27117388	MSAD_266744.t1	Medtr2g029370.1			√	√	√		√	√								√	AATAAATTTAAATGCTGATTTTTTTTATTAATTTAATATATTGCGTCCGCATGAGTGGTCAATACATAATATATTGAAGGTCTGGATTCGAACCCCATAATCTATAAAAAAATAATAATTTAATACACTGCATTTAATTATTAGTTTTTGTTTTTTTTTTTAAATTAAAGATAAATTGTTATTTATTCATAAAAAAAGTGGGTAAAGTTAGTCATCTAACTATTTTTTTTGAATGGCGGTCATCTGAATTGACATCAATCAAAACAATTTTTTTTGTCTTCGTTTCGTTGTTATTAATATAAATAGATTAATATAATAGATGAATTTTTTTTTAAGGATGATTGTATATAGTGTCGGGGCTTTTAAGGTCTGTTTGGAACAACAGACAATATAGGAAAA…
MsMYB195	MSAD_306780.t1	Medtr4g100630.1	At5g47390	At1g16160	PubMedID:27117388	MSAD_299368.t1	Medtr2g031520.1	√		√	√			√	√	√								CTACCGAGGTTTTCCTCGGCAGTTAACTGCAGCCGATTTTTGAATTACTCGGCATTTAACTAACTGCCGAGGAGGCAAAAACGTATTTTTACTTATGTGCCTCAACGTTATCTAATATGTCAACAACAATTTTCAACCAATCCCCACACCATCCATCCACCCAATGTTAGTCTTCAACGTTTTGATTAGATGATGAGACCATTCTCCCACTTGCATGATGGCCCCAAAGTCCCTAACCACAACAAATGTGCCCTCCAACATGGTCCCACTTTACCAAAAAGAGCAAGCACCAATCAAACCTCAGTAGACATATTTTTTGGTAACCGGTGCTCTTAAAAATACAATTTAATTATACTACTATTTAATTAAGGGTCATGCTAACCGGTGCTCCCGGGCACG…
MsMYB195	MSAD_306780.t1	Medtr4g100630.1	At5g47390	At5g49620	PubMedID:27117388	MSAD_218522.t1	Medtr2g033170.1		√					√	√							√		TTAGCACCTTCTTCTTCTCTGCAGCACTTGCACTGATGCTTAAAGTAGCATGATTAGCTAAACGTTTAGAAGTTAAAGAAGGGTGTGATAGAAAGGTAGAGGAGATTGAGAGAGAGGTGGATTGGAGTGAAGAAGAGAAAGAAAGGCGCAAAGTACAAGAATGTGAAAGTGGGAGGAGATTGGAAGAGGTTGAAGTGAAGAGCAAGGTAGGTGAAGAGGAAGCAAGCATGGCCATTGTTGCTAAAGAGTATGAGAACCAGCAGTTCCAGATAAAGCTAACCACTTATTTCCTTCCTTTCTCATTTCCAACAGTATGTATGGTTTATAAACGTTACAAAATGTATTGTTGATTCTTAAAAAAATAAATAAATGTATTGTTGATAAAAAAGAGTAAATTAT…
MsMYB195	MSAD_306780.t1	Medtr4g100630.1	At5g47390	At4g34620	PubMedID:27117388	MSAD_227263.t1	Medtr2g039750.1	√	√	√		√	√	√	√			√	√			√	√	ATCTATCTGAGATAGAAAATAGGAATTTTTAAAATGAACATTCGGTAGTTATCTACCGGATGTACAAAATGAATTTAGGATTTCATGGTCCGGCCCAAAGATGGATTTATGATCTGGCTTGTTACGTAGACTTATTATTCGTTGGTTTTCCCTTACGAAAATTGCTCTTTGAACTTCCTTAATTGCTCTCAAGCACCCTAAACTAACAAAAAATACCTGAAAACAACAGTTAACTGTCGTTTGCTTGCTTACGATAGTGAACCATTGTTCCGAAGAGAAAACACATTTTCAAGCAAGAAGACATGCAAAGAGATATTGAAAGACCACTTAATACATTTATAAATAAGATAGGCAATCACTGCCAACAAAAAAAAAAGGATAGGTAAAGAGGTATTCAAA…
MsMYB195	MSAD_306780.t1	Medtr4g100630.1	At5g47390	At5g44590	PubMedID:27117388	MSAD_293267.t1	Medtr2g062700.1			√		√		√										CCCTGCAAAGAGATATTAGCCACTTTCCAATGTTCATTGCAAGCAATCCCTTCAAATGAACCACTGCATGGATTACCATCACCGATCCATGAGGTAAGAATCTTTCCCTCTGGATCAAGAGAGGCTTTCAAATCCATCAAAGCTCTTAGCTCTGCATTTCCAAGAACAGTTTGTGAAATTGAAAAGGCAATGAAAAAAAACATAGAAAAGAGGAGATGGAAGGAGTTCATGTCTGAATTATGAATTCTTGAACAAAAGCTAAAAAAAGAGATACACCCTTTTTGAGGTTTTATGTTAAATAAGCTATCTGTGGTTTAAGGTTGTCATGTAACATATTGTTTGATTAATGATTAATGATCACTACCTTGTTAGAACTTTGTTTTGAGACTTAATGGTGTG…
MsMYB195	MSAD_306780.t1	Medtr4g100630.1	At5g47390	At1g78830	PubMedID:27117388	MSAD_285190.t1	Medtr2g076590.1						√											ATTGGATGATCAAAATATGTCTTGGTCAAAGATTCTGAAATGTGGAACTAAAATTGCACAATTAAAATTAGAGGGGATGGGGACCAAAATTGTGTTTTGCAAAATAAAAGGATTAAAACTGCATTTAAGTTTAAAATATATTAAAAATCAAAATTACTGATAAAAATGATTTATCATGTTTGAAACATATGAAGTACTAAAAATCTATATTAAATTAAATTAGTAAGTATTATTTAAAAAAAAATGTTAATGCAATGTATCATACTAATAAAAAAAGGGTGTTGTTCTAAAAAAAAAAGGTGTTAAAATTTACTTGTGCATGTTGTTCGATTTGATTCGATTTTAAAAAAGTTATTCAAAATCTGATTTGATCCAAATAATTTTCACAAGAAAAACATT…
MsMYB195	MSAD_306780.t1	Medtr4g100630.1	At5g47390	At2g28950	PubMedID:27117388	MSAD_257176.t1	Medtr2g097030.2	√		√		√							√	√				TCCATCGCACCGGTTCGAATTTTCCATCTACGCGTTACTAATAATAATAATAAAAATTAATATTTAATATTTATTTCTTTTTAGAGAAATAGAGGGCATATGTAATGTTCTGGATTGGCTAAAACCCTGATGCCCAATTACTTAAGCCCATTACAAATACAGCCTAAATTCCACATTTTGCAAGATTACCCCGTAACACAACCTTCCCCGCGAGGAGGATGCTCAGAGCAACCGAGGCCAATTCAAATGAATTGTAACGTCTCCTTCCACACTCCCGAAATATGCTGTTACAATTCCTACTAATTCGTAACCGTCGGGCACACGTGTGCCTTACAATGACTCTGCAAACACTCACCTCTATATAAAGGGGACTCTTCGCAGTCCCCAAGGTAGAATCAT…
MsMYB195	MSAD_306780.t1	Medtr4g100630.1	At5g47390	At1g80380	PubMedID:27117388	MSAD_321500.t1	Medtr2g102510.1	√	√					√	√									GGTTCATGTAAACTTAGTTTACATAAGCTACTTAAACTTAGTTTACATAACCTACTTAAACCGAGTTTAAGTATGTACACTTAAACTCAGTTTACATGACCTACTTAAACTAAGTTTACATGTACATACTTAAACTGATATTACGTATAATCATTGAACAAAGTTGAACTTTTAGATGTACACTTAAACTCAGTTAACATGACCTACTTAAACTGAGTTTACATGAGCTACTTAAACTAAGTTTACATGATCTACTTAAACTGAGTTTAAGTATGTACACTTAAACTTAGTTTACATGACCTACTTAAAATAAGTTTACATGTACATACTTAAACTGAGATTACGTAGAATCATTGAACAAGGTTGAACTTTTAAATGTACACTTAAACTCGGTTTATA…
MsMYB195	MSAD_306780.t1	Medtr4g100630.1	At5g47390	At1g80180	PubMedID:27117388	MSAD_281485.t1	Medtr2g103380.1				√	√		√	√	√			√				√	TGTTACGATACGCACAGATAAGTGTGTTTTTTTATATTATTTTGATTTCTGTTTTTTTTGTAATTGAGCTAATAGAGTTGTCTTTGGATGAACCAGATTTGGAAGCTAGTTTGTATCTTGTTGATGGAAATGGAGGAGAGGATATTGAGACGATTAATGTTAACTAAAATAACTTAATTCTTGAATACTGATGTGTTCTTTTTTCGATATAGTGCTTCTTTTTTAGATCGATATAGTATAGCACTAACAATGTTCTTTTTAGATATAGTATAACACCGATGATGCTCTTTTTGGTATATATTGTGTATGTAATTGACTAATCACCACTCTCTTAATCGTCAATATTATTTATATTTATGTCGATGTGTTACGAGCCTATGATTGATTTCTTGTGTTTGT…
MsMYB195	MSAD_306780.t1	Medtr4g100630.1	At5g47390	At4g14270	PubMedID:27117388	MSAD_273188.t1	Medtr3g023110.1			√	√	√		√	√		√					√		TAAAAATTCTAGTACTTGGAATGCCATTTTTTCTGCAAATGCTCATTATGGTCCTGGTGAGGAAGCACTAAAATTTATTGCAAGGATGAGAAATGATGGGGTTGACTTGGATCAGTTTAGCTTCTCCGTAGCTCTTGCTACTATTGGTAACTTGACAGTTCTGGATGAGGGTCAGCAGCTTCACAGCTGGATTATTAAACTTGGATTTGAGTTAGATGAATACGTTTTAAATGCTACAATGGATATGTATGGAAAATGTGGAGAAATTGATGATGTATTTAGAATCCTTCCGATACCAAAAATCAGGTCAAAGAGATCTTGGAACATTTTAATATCAGCATTGGCCAGACACGGGTTTTTCCGCCAGGCCACAGAGGCCTTTCATGAGATGCTTGATCT…
MsMYB195	MSAD_306780.t1	Medtr4g100630.1	At5g47390	At3g52150	PubMedID:27117388	MSAD_284186.t1	Medtr3g027140.1			√	√			√										TATGTTTCTAACAATGGATTATTTTCCAAACTCTTTCAATTTTATTTTTATGACAAAATCTTTCAATTTATTTTATAACAATGTTTTATATAATCAGGTCTTTACATAATTTATATTTATAAAGAAAATTATTTTATTTCATTTATGATAATTTGTAATAAAATCTCAAAGATTTATAAAAAGTATTTTAACAAACAAATTTCAACTTAAAAATACTAATTTTTGTCAAAAAAAAAACTTAAAAATACTAATTAAGTTGCAAAAAATAATAAATACCAAACAACTTAACTTAAAAGTTTTAATTTTCAACTTTATTCTAAAAGTAACTTTTAGACCTAAAAAAAGTAGGGCCAAACCACTTTTATTTGATTTCCTTCTTTAAAAAAAAAGATACTTCTA…
MsMYB195	MSAD_306780.t1	Medtr4g100630.1	At5g47390	At5g54940	PubMedID:27117388	MSAD_222999.t1	Medtr3g051950.1		√	√	√			√								√		TCGTGTGAAAAGGGAACTAACTTAATGAATTCATTTCTTAAATTCATAGTTTACCATTTGAATGAATAACAATTCATCTTACAATACCCTACATGCATCTTTGTCATCCTAAAAGTATCACATCATGAAAAAAAGAAGTAATGGAGAGTAATGTAAAAGAAATGTTGTAGCTCATCAAAAACATAACTTATAGTGTCGTCGTGAACTTAACTCAGTTGATATGGATAATGCATAATATATGTAAGGTCGGGGGTTCAAACCCCACCACCACAAAAAAAAAAACATAACTTATAGCATAAGCTCCACCAATTTCCAAAAAAAGATCGTCTAATTTTAGTGAATTACAAAAAAATAAATGGAGAATAATGTTTAAAGATTTTTAATATTGCATTGAGCTAG…
MsMYB195	MSAD_306780.t1	Medtr4g100630.1	At5g47390	At1g27290	PubMedID:27117388	MSAD_236746.t1	Medtr3g084990.1	√	√	√		√	√	√	√	√		√	√	√				ATAAACTATTTCACCGTTACCCCTGTTGTCAGTTAATAATTAATTGATATTGTTGGAGCTGTTAAATTGTTGACTTAAATCAAAACGTTGACTTTTAAAAGCTTCATGGTGTCAAAACATTACGTTTAATGGTCGCAAATATCATTTTAACACTATAAATATCGTTTAATAATGCTAGAAAGACATTTGTTGTTGTAAATAACTACCTTTCTAGCACTGTAAGTGATTATTTGTGATCATTAAACGTAGCGTTTTGACACCCTAGAGTTTTTAAAATACAACATTTTAATCTAAGTTAACAACTTAACGGTTACATCAGTATTAATTAAACAGATGCTAATAGCAGATGTAACAATGAAATAGTTTATCAACTAAAAGGATCTGTTTGAAACTTTTAAA…
MsMYB195	MSAD_306780.t1	Medtr4g100630.1	At5g47390	At5g65205	PubMedID:27117388	MSAD_316284.t1	Medtr3g087850.1				√			√	√							√		AAGGGTTGGAAAAGTAGAAAATGAGTGTTTGTGAATTGCTGCTGATTTTTTGACGTGAACAGTGACTTCTGGCCCATTTCCCAATGATTGACAGGGTTTTTATAGTGACAAACTAGGGTTGGCTCTGGTACAAAACAAAAACCAAAATGCCCCTGCAGCTGAGACTTGGGGACAAAGGCTTAACAAATAAATAAATAAATAAAAATAAAAAGAATGAATAAAAAGAAAAAGAAAAAGAAAAGCAAAAGAAAAAGAAGAAAGGGAAGACGTATGTCTTCTTCTTTTCTTTGTTGTGTTTTTTTTTTATAAAAAAATAAAAATAATAAAATAAAACAATAATAAACAAACTAAAAAAGACAAATAAAAAAATAATAATAAAATAAAAATAAAAAAAATAAT…
MsMYB195	MSAD_306780.t1	Medtr4g100630.1	At5g47390	At5g05190	PubMedID:27117388	MSAD_280698.t1	Medtr3g093780.1		√			√			√					√		√		TGAAACGTGCAAAATTGAAATTTTGTTCCGCGTAAGCGTATACTCACAAGTCAAATTTAGTTCCCTAATTTTGTAGGCATGACTAGAACATGATAAGGAACATTCACAATGAAATTTTGTAAATTTTAAACGAGATACAAATTAATTATAAATTGTTTAAGAAATTCATAATTATGAGGGAATAAAAATTCATAATTAATTTATCCCTGGTCGAAGAAATTTAATTTTATGTAAAGCTATATTTTAACGTGCTAAACATGTAAGAAAAAAATAGTGAAAAAATTCAACATTTAGGTCACATGTTTAGACTACACGTATATTATAGGGTGGTCAAAATTAAATAAGAAGAAATTCAAGTTACAATGTTAGAGTATATATTTTGTATTTTATTGGGTCATT…
MsMYB195	MSAD_306780.t1	Medtr4g100630.1	At5g47390	At1g01630	PubMedID:27117388	MSAD_272060.t1	Medtr3g098530.1			√		√		√	√				√					GTTTTAAATGACAACAGAAGAACATAGTATAATTTCTATCATAGGAAAGACAACATCAAATAAATTGAATCTTTGGAACTCATTAGGGAATGTAAAAGACTCAAGATTCATAGGATACTTTTTTTTGTTGTTGAAACGTTCATAGAATACTTATAAAAGTACTTATATACTTACACCAATTTGATGCTTACATCGATGGTGATTATTTCATTGCACTAACGTACCTCATAATAGACTTGATGTATGAAGTTGAACTTAAAATTAAAATCTAGACTTGTCCTCTCTAGATTCATTTTTCAGCAAGCTCTTGCAAAGTTGCAATTGTAGCCACGTCATCCACAATTCCAGAACCGTCCTTTCCACATTATTCTAACTATTTTGTCATCTTTGAAGATAAAA…
MsMYB195	MSAD_306780.t1	Medtr4g100630.1	At5g47390	At5g63470	PubMedID:27117388	MSAD_219752.t1	Medtr3g099180.2			√	√		√	√	√			√	√	√	√	√	√	CAAGGCATGGTTGGATTCAAAAGAATCGTCTTCTGTTGTTTACATTGGATTTGGGAGCGAGACGAAAATAAGTCAACAAGATCTAATTGAGTTAGCTCATGGAATTGAGCTTTCTAGGTTGCCTTTCTTTTGGGCTTTGAAAAATCTTAAAGAGGGTACACTTGAATTACCTAAAGAATTTGAGGAAAGAACAAAAGAACGTGGAATTGTTTGGAAAACATGGGCACCACAACTTAAGATCTTAGCACATGGATCAATCGGTGGATGTATGAGTCACTGTGGTTCAGGTTCAGTCATTGAGAAGCTTCATTTTGGGCATGCTCTTGTGACATTGCCTTATTTAATTGACCAATGTTTGTTCTCAAGAGTACTAGAAGAAAAGAAAGTGGCTATTGAGGT…
MsMYB195	MSAD_306780.t1	Medtr4g100630.1	At5g47390	At4g31080	PubMedID:27117388	MSAD_293831.t1	Medtr3g108690.1			√				√										AAACAATATTGGTATGAAAGTGGATTGATCCACCAATCTATTTGACTTAATTTTATTTCTACTTGTAATCTCAATTTTATGTTAATCCTTCTACTACTTTTCAACCTTCCGTCACTTGTAAGTGGAAACTTTTTTGAAAGTTCAAACTACATTAAAGTTACGAAAAATTACACCTCCAAAAGTTAATCGTATAGAGGAATCAGATGTAGTGAAAGAAAAAACGTGTGCGGAAAGTAATAACCAGTCCTTTCTTCTTTTAAAGTTAAATTAGATCATCTAAATTGACACGGAAGTCAATTAAACTCATAATCTACAAGGTATAACTAAAGTTCAACAAACTATATGCGATCAATATCATGATTGTAACATCAAGATTTATGATGTCTCTTGTGATGATAT…
MsMYB195	MSAD_306780.t1	Medtr4g100630.1	At5g47390	At4g31450	PubMedID:27117388	MSAD_293844.t1	Medtr3g108808.3	√					√	√	√				√		√			ACATATTATTTTTTTTGAAGAACATAATTCTTTCTTATAAAGTAAGAATCGCCCATTTATAAACATTTGCTCGTAACATGTTATATTACCCAAGAAGCATGGACGCAAACAGGACAGACACACTGACACACACCGATCCATATAATTACTTGAGACAGACACACCAAAACAAATACTAATTTAAGAAAATGACATAATTTAATGCAATTATAGGTGTCGTGTCGAACACAAACGCGTGTCCGCATCAAAACACACCTAATCCGAGAAATCTTCATGCTTCATATTGAAGGTGAGAAAAACACAAGAAGGGGGGTTGAATTGTGTTTTCTTCTTCTCTCTTAATTAATCTACTTCTGATAAACCTTCAGAAGCAGTTTGTGAATGCTTCTGATGAATAGA…
MsMYB195	MSAD_306780.t1	Medtr4g100630.1	At5g47390	At1g09890	PubMedID:27117388	MSAD_235279.t1	Medtr3g111410.1	√		√				√	√	√				√			√	AATATATTATAGGGAAATGTTAACCGGTGCTTCCGGGGCACGGGTTAAGGATATAAAAAAGGAAATTATATAATAATTAATGCATTAAAATTATGTAATTAATTTATAATAAAATCAAAAACAGTTTCCTTTTATGATATGTTTAACTAGTGCTCCGAGGGCACCGGTTAACAGAACCCTATATTATAATGCAAATTTTAATTATAACATCACTGATCTTTAACTACAAAAAGTTTTAACTCACGTTGAGCTTAAGAAATAACATGAAAATGAAAGCTCACCTAAAGGAGTTCATTACAACAAGAATGTTTGAGATTCGGAAAGAAGTATTAATTAGGAAAGTATCATGTGGGTCCGATCCTTTTTACTAAATTACATCATTTATCATGTAATGAAGTA…
MsMYB195	MSAD_306780.t1	Medtr4g100630.1	At5g47390	At5g61440	PubMedID:27117388	MSAD_327611.t1	Medtr3g435370.2				√		√	√	√				√					TGTATAGTTTGTGTCATGCTAACATACGTGCCCTGAAAGTAATGTTACATTCTACAATGTATTATTAAGAATAAATGGATACAACTTCTAATAGGTCATTTCTATTTTTTTTTTATATAAAACACGTTATTTTTAATTATAAAAAAAGTAATTAATATTATATTGAAAACTGAAATAAGTCAATTTTTTTGGGACAATATTTTTTACAAATGACTCACTTATTATAGGACAAAAGGAATATCAATTACTGCGTCCCTATGATAAAGTAGCACAACTTGTTATGGGCCGGCTAAAGCACTTAGGCCCAATTACTTAGACCCAATACAAATACAGCCCAAATTATGAATTTGACAATATTACTCGCAACACACCCCTTCTCCACGGGGGATGGGCTCGGAG…
MsMYB195	MSAD_306780.t1	Medtr4g100630.1	At5g47390	At1g55960	PubMedID:27117388	MSAD_298983.t1	Medtr4g005140.1	√		√	√		√		√					√				GATCCACACTATTTTGTCTTAAGTGCCGTTAAATATAAAAATTCATGGTCCTCAGATAAATGATACTATATCATTTTTGCCATTAAAATTGAGTCAATTATTTCCTTCTTTGTTTTCCTCGGCAGTTAACTGCCGAGGGGTATTTTGGTATTTTACATCAAATTCAGACATGGATGCATATTATGTCAATTGGGATCGGCTGACCCCACTTCATTTACTTTTTTAGGGTTAAAGGTGCTTTATCCGTCTGTAATATAGATCATTTTTTATTTTCTTTCTTGTAAAATAATTTTTTTTATTTACCCCTGTAATTTCTTTTTTGGAATACCCTCCTAATAGGTTATAAAAAAACGAAAAATTTACAGAAAAAAAATAAAAAATGACCTATATTACAGAAGG…
MsMYB195	MSAD_306780.t1	Medtr4g100630.1	At5g47390	At2g20890	PubMedID:27117388	MSAD_330824.t1	Medtr4g045980.1		√	√	√			√	√		√	√	√					ATGGAGACCAAATAGATGCTCCCAAGGCTTTTAGAGTACAATAAGTGCTAGAAGGAATGTTTTCCAAAACTGGACCAGAGATTGAACAAGTGAGACTTTCGGGCCATGGTTCAATTAGTCGAATCAGATGACTATGAATAAGTAGAAGTACTAAATGTATTTTAAAAACTAGAAATAAGTGAAAGAACGTATATGTTCTATCATATGTAGTTTAATTTGGTTCGATTTGATTCGTATAGAAAGAAACAAAACGGTGGTTATATACCAACTGGCTCTCCATTTACGAGTATAAATTGATATTCCTAGTATCTGATATCCAACTCATCAAAACTAATCATCAAAATATCGAGTTTAAGCATCATCGAATAGATCATAACATTAACTCATTTTAGTGAAACC…
MsMYB195	MSAD_306780.t1	Medtr4g100630.1	At5g47390	At4g34250	PubMedID:27117388	MSAD_251400.t1	Medtr4g070270.1				√	√		√	√			√	√					GAAAGGTATAAATCGAGAAAATACGTAAAACTTTTTTTAAAGGCTACTCTAAGTTAAATGTGGTCTTAAATTCCTTTAGTATGAATATTTTTTTGTCCTCCCATATTTTTGTTCTTTAGGTTTCTACTTCCTTTCTTTTATTTTCTCTTTTTTCACTAATAAATCTTCATTTTGTTGTTTAAAGAAAAAGATACATACACAAATTAAATCATGATTAATTCAATGGTGTAAATTCATTGACTAGAGAGACTTTGTATTTCCTTAAGAGTATAGAATCTAGATCCATTGACTATGAACACAAAAAAGAAAGACTTGATTTGTGTACACTAAAAATGATGCCTTTTATCAAATCACATAAGGAATCAGCAACTATAAGGATGTAGATAGATTCAAGGAATA…
MsMYB195	MSAD_306780.t1	Medtr4g100630.1	At5g47390	At4g34530	PubMedID:27117388	MSAD_319785.t1	Medtr4g070320.1		√	√	√				√	√			√			√		AAAACCTTAAAACATTGTGTTTATGGTCCTCTCATTTTATATATTGCTTAAGCTGAAGTAGTGTAGAATTTAAACTCACACTTAACACATTGTAATACCTCCATATTAGACGGAATTTATATTAAAAAAAAAAAAAAAAACCAATCATTTCATTCAGGTTTGGAGACTATTCTTCCTTTTATCCTATCTTTTTTTTGTTTTTTCTAAATTACCTTTGAAGAATGGTGGGTAATTTATCCACCAACCAATGAAAATGAGCAATTTATTTGTGGGGTCAAGATAGTTCATGAATATGTGCTTATGTGGCTAATGTGTATTGGTTGGGGTAAATTATCCATCATTCTTTCATGGGTAGCCTAGTTGTCACTTTTTTTTTTTTCAAAGCTCTCACATCCTAAA…
MsMYB195	MSAD_306780.t1	Medtr4g100630.1	At5g47390	At5g54540	PubMedID:27117388	MSAD_257494.t1	Medtr4g081550.1				√	√	√	√	√			√	√		√			GTTCTCAGTTTTGTTCTGTGCTAATTTGACCCTAAAGATGTTTTACATGCATAGTAACTGCTGGCTGTATATTTATGGAGATGCATGCTATTGTTACTAACCATCTGAAACTAACTGTTCAGTTTTCCTACATTTTCTTTGTGCGGGTCTGCAGACAAGTCTCCATAGAGGACGGGGAAGCAAAAGCACGTGAGCTCAATGTCATGTTTATTGAAACTAGCGCTAAAGCTGGATTTAATATTAAGGTAACTTGGGCACACTTTTTCCCCTCTTTCCATACATCTGCAGTAATCGCTCTGTTTCCCTTTTCTCCCTCTATCCACATGTATTCAGTAAATTCTGTTTCCACCAGAATGAAGTGAACTATACAAAATTATGAGATTGGATTCTGTTTCTACT…
MsMYB195	MSAD_306780.t1	Medtr4g100630.1	At5g47390	At1g11090	PubMedID:27117388	MSAD_279916.t1	Medtr4g089170.1			√	√			√	√			√						TACAGTCTTTGAACATTTGAGAAATGGGTATTGGATACGAATTATTAAAATTGGTTTTCCATGATGAAGGTGCATACACTAACTCATATAGACTGATGGGAGATGTCAGATGTTGTTGTGCTAGTTAGCCTTTACCAGGTAATTACAGCAAAGTGAAGGCATAGTGATTAGCATTGGTGGTAGGTCTCTCATGGAGGTTGATGTTACAAGCGTGAAGACTGAAGATAAGGTGAAAAAAAGATATGATGCAGATAGACCACAGTAAAATCAATGCACCTATTCAATCTAATGATAATTGAAAATCTTGTGTATGGTGCAGGTTTTACACTTGTGCATGTTAACCGTCACCCATGTTACGTATCAATGTAGAATTTAGATATATAAATATAACACAATGAT…
MsMYB195	MSAD_306780.t1	Medtr4g100630.1	At5g47390	At1g11260	PubMedID:27117388	MSAD_279857.t1	Medtr4g091370.1	√	√	√				√	√							√		TTATTCATAAGATCCTAATTAATAATCCATTCCATTAATTGAATCCCATGCAAAATTAGTTTTTTTCTGTCTGCATGTAATGTATCCAGGCCACGCAGAACCATTAATTGCTAACACTTTAAGAAACTATAACTAAGATTACCATGACCACACACACACGACACGCAAACATGCACAACCATAAATCCACTTTTGGAATTTTGAGTTTAGGCTCAATGTGGACATATGTGATGTGAGGTAAGTTTAGCCCTATTTGTTTACTTCGTGTGCACTATGTTCATCTCTTTCCACTTCTTTACGTAATGGCCACTTACCATTTGAAGCAATAATTAATGTTTTAATATATATACACTTAACGATATCTTAGTAAAGACTTGTGAGCTTAACTCAGTTGGTATG…
MsMYB195	MSAD_306780.t1	Medtr4g100630.1	At5g47390	At4g37270	PubMedID:27117388	MSAD_317031.t1	Medtr4g094985.1	√			√	√			√			√				√		GTTGTAACTTGACTTTTTCATCCTAATTTTTTCGACACTCCTTATGCTTAATCTATCACACATTAATTAATATAATTCATTTTAATCTCTTATTGCTTAGCATAAGATTGTTCTTCTTTCCCCTTTTAGTTTTCCATACACTTTATGTTTAGCACATACTAGACCATAGAATTTGTGCCTACAGCTTAATTAAACCACACTTCTACACAATCTATAAGTTGGGCGAGGGATATTTCTGCTTAACAAACAAGTATTACAAAATTAATGCTTGCCATTAAACTTGCGTAACAAATGTACCTATGAGTGAGTGACGTTGAGATGAGGACCTACCAGTTTGTCCCCACTAGAAAGCCATGAAATGAATGGAGTATTATCTTTGACTGTGTATCTTTATAGAAT…
MsMYB195	MSAD_306780.t1	Medtr4g100630.1	At5g47390	At4g37800	PubMedID:27117388	MSAD_267801.t1	Medtr4g097670.1			√	√	√		√	√		√	√	√					AAAGAGACATTGATAATTTGGAGCCCGATTGAGAGGTAAGTAAAGTCTGGTAAAAAATTATTTCACTAAAAAATCTTGCCTAAAGTTCTCGTGAATGATTCATTCTTTAATATAGTATATTGATTATCCTGAACAATTTGTCTTTAGCATGTAAGTAAAGTCTGATTAAGAATATGTCAGTAAATTGCGTCATTAACATTGCTAATTTAAAACATTTAATATTTTTGTTAACAAATCATTTTACTTTGATATTTTACCAAATTTACAAATCTCATTACTTTTTTTTCTTTCTTCCATATGTTCGATAAGAGATACTCCCTAACGTCCCTAAATATAAGTAAAAATTAGTCAACAAAAATTAATGTATTTTGTTTAAAATTTGTACCAAATACATCAATT…
MsMYB195	MSAD_306780.t1	Medtr4g100630.1	At5g47390	At4g17550	PubMedID:27117388	MSAD_249717.t1	Medtr4g099450.1				√	√		√						√			√	GAATTCTAATCAATTCAAATGATTCAATTGAATTGATTTCATTTTTAAATATCCTTGTTTGGATGGAAAAATAAAAAATTTCATTGTCATCATTTTTGGGCAACTTTTATAAATTTTAATGTTTTTGGGCCAAATTTGGAAATTGAAATTATGGGTCAATTTGTAATTTTTAAAAATTTTGAGGGGTCAATTTATAATTTTGAATAAGTTGAGGGGAATATTTGTAATTTCCATAAAAATATTAGGGCTGAAATTGCAATTTTTGTAAATTTATTGGGGTAAATTTGAAAATTGAGGACCTAAATGAAAAATTATAAGAATAAAGAAATTTCAAATTCTTAGTTTTTAGATGTCATTTGAAATTCTTTAAATTTAACTTGAACAAAATACTTCATAAAT…
MsMYB195	MSAD_306780.t1	Medtr4g100630.1	At5g47390	At4g24690	PubMedID:27117388	MSAD_235589.t1	Medtr4g104880.2			√	√		√	√						√		√		GACCTCCCCAATTTTGGGGGTCCAAAATATTTTTTTTTAATGTACAATGCACTAAATCTATAATATATACAGGTAGCATTACAAATACTAACATAATGGATAATGGCCCCAGTGGTATTTCTTGGTGTTGTTATTAAAGGTGCCATTGGTTCAACTCTCATTAATGGCAGTTCTTCATATGTTTTAAAATTTTATTTTTTCTAGAATGATAAGATCTTTTTGGGCCTAATTTATTTTTTTCTTTTTTTTTAGAACACTCGTAATTTTTGGCATATACTTGTCGTATAAAATCGTAAAGTTCTAACAACAATCAATATAATTATTCTCTAAAAAAAAAATATAAAAAAGCCAAACATTATAATTATAGTTTTTTTCCTCTTTTAAATTTTTTTTAGAGAC…
MsMYB195	MSAD_306780.t1	Medtr4g100630.1	At5g47390	At5g62570	PubMedID:27117388	MSAD_271942.t1	Medtr4g106810.1							√			√							TTCTGGAATGCATACTTTTTATGAACTTCCAACAGTTTGTCTATGGATTGTTTAGCCTAGAAGTTTAATTTCTGCCGCAAAAAAAAACTTTCAAATTCTATTTTCTAGGGGTAAAAACTTAAAAAAAAATAAAAAGTTTATTGTAATATATGTATATTTTTGAACGTAGAGTGAAATTTTCTTTTTGAACAGAACGTAAAATGAACTAAAGTAGGTCATGCTACTAATATAGATATTTTCATGCACAATCATTGGTCATAAACGTGCCATTGAAAAGCAGTAGAAGATAGCAAGCACCAATCTTCCAAAAAGACCTGAAAAATTAATCATAATTTAACAATGTTAGCTATGCATTTTTAACAAAGAATTCATTAAAAGGATTTTACATCATATTTTACC…
MsMYB195	MSAD_306780.t1	Medtr4g100630.1	At5g47390	At5g62630	PubMedID:27117388	MSAD_271991.t1	Medtr4g107400.1	√		√	√			√	√			√	√				√	TCAGAGTGTCTAGATTACATGATTTGCTATATACAGGATACAGGAGTGTGACACATGCCAAGGTCACAGCTCTGTGTGCGAGAGGTGGCATCCCGAGACTAGTAGTTTCCATCTACCGATGAGAGAGATAAGCATCACATTGGACGATGTGGCTGATCTTCTCCACATTCTCATTGAAGGGCGTCTCTTTGACTATGAAAAGAAGGTGTCTCAGGAGCGTGGAGTGGAGTTGATGGTCCGGTGTTTAGGTGTTTCGAAGGTTGTTGCAGTGAAGGCGTGCAAGGATGAGTTTGATGCATATATTACTTATACCTCGCTGAAGGAGCTTTATGAGGCGCACCTTACTGTAGCTACAAAGCTAGAGGTGCCACAGTCAAGGTCGAATTTGCAGGAGAGAGA…
MsMYB195	MSAD_306780.t1	Medtr4g100630.1	At5g47390	At4g16155	PubMedID:27117388	MSAD_289617.t1	Medtr4g121880.1		√	√		√		√	√	√	√	√	√			√		ATTTTTAATCTCTCTATTAGAAGTTCTTGTCATCGTGAGTTTAGCTCAGTTGGTTGGGGCAATGCATAAAATATGTAATGTTTGGGGTTCAAATTCCAACCACCACAAAAAAAAAAGAAAATTGAGTATTATCCTCGTGACACCCCACTTCTCCGTATTATAATGTGTGAGCTCTAACGGTTAGTTTACTTGACAAAAAAAAAAAAAAATTCTTGAGTATTCTATGTATTGGAAAATTGCATTTGACCTCCTTGAAATAAATTTCGTCTTTGAAATTTTGTGGGTCTAACTAACATCTTTAAGTCCCTTTTGTACTACTTTCATAAATTTATAATTCCAAACTCGAAAACAAAACTACTATTGGGTTACCACCTAAGAAACTAAAAGATATGCACAACA…
MsMYB195	MSAD_306780.t1	Medtr4g100630.1	At5g47390	At4g25990	PubMedID:27117388	MSAD_328976.t1	Medtr4g127420.1		√					√	√						√		√	TAAAAAACTATGTTCATCGTACCCTCTTAGTACATGTATCATCCAATATTTACTAAATAGTTTAATTATTATTTTTGACAGAATTAATAATTTAATTATTAATTGACATTTTTATTTGAAAAAGTTGTATTAGAATAAGTTGAATATAACAAAAATGAAAGAATACCAATACATATGGCGTAGAATATAACAAAAGGAAAAAAATACATAATTTAACAAATGAATGAATTATGTCAAAAAAGACAAATGAATGAATCTTACTAAAAAAAAAAAAGAACATGTAAATCAATTTGGCTTCGTTGCCACCTCCAAATACCCTTTACAAAAATACTCTTTCACCAAATGAAAGGATATACGATTTTTAAAAAGTTTATGCTAAAGTACCTTACGCGTAGATGT…
MsMYB195	MSAD_306780.t1	Medtr4g100630.1	At5g47390	At4g16390	PubMedID:27117388	MSAD_224004.t1	Medtr4g133740.1			√	√			√	√		√			√			√	ATGAGTATATTTATACTTACTTTTTCATCATTCCAATTATATCCTTAAACAACTTTTTCTATAATAAAATTATTGTTGGTGTCATTACAAAAAGAATTTAGATTATATTTTCTTTATCATATTGTATTATTATTGGTGTCGTTGAAATAGATAATCATGATTAGTTTGATTTTTTATAACTTGAAAGCAACAAACATTTATATTTTTTTAGTTGACTATAATATGAATACTGATTACATAATTTTTATTTTGAGAGAACTGATTTGCATGTATTTTGACTTAAGAGGTGGTGCACTCGGTTGTGGTGCTAGTCAAGTGTCGGCTAGTCAAAGTATGATACTCAGAATTAAATTTCACAAAAATAGAAAAACGTATTCAAAACATACAAGGAGTACTAAA…
MsMYB195	MSAD_306780.t1	Medtr4g100630.1	At5g47390	At3g22450	PubMedID:27117388	MSAD_278868.t1	Medtr5g006310.1	√	√	√				√	√			√		√		√		AAAAAAAACTACTACCAATAAACCTCCACAAATAAAAAATAAAAAAAAAAAGACACCTAAAAAAATCAAAATAATTGGTAGTAATAACTTCAGGGCACTTTTTAGTCAAAAAAAAAAAAACTCCAAGACACTATTTTAGTAAATTTTTTTTTTTGCAGGCACATTGTTTTTTAAAAATTACTCCATTTGGTTCTAAATAAAAGTTTGTTTATTTAGTACTTAAAAATGAAAAAAATCTTTAAAGATATCAAATGTGGGTTAAATTGAATGTATTAAAATTGTTTTCATCTAAAGAAAAGGTGGATTAAATTAATCCTTTTTTTGAATAATTATTAAGAAGTGTTTAGTTTTTTCTAGAATGTTTGATCAATATTTAACATTTATAAAGACCGTCCACGT…
MsMYB195	MSAD_306780.t1	Medtr4g100630.1	At5g47390	At3g23080	PubMedID:27117388	MSAD_278933.t1	Medtr5g007030.1				√	√		√	√						√	√		ATGTTAGTGACGATTATGTTTTAATATAAGATGCATGTTTTGTTCTATGTTTAATGGTATATGAAAGAAAGTATAATACTCTTTCATTTTGTTTTTTATTGACAAGTCAAACGCTACCAATTTGCGGTATATGCTACTATACTATATATTGATGAAGAGAAACGTAATCAAATATTACATTCTGATTATAACAGATTAAGATTAACTTTAAGGTGAGATCAAACTGGAAAATTTAATCCAATCATCTCTAAATGATGCCTATTTCTAATTGGTCAAACTGAAATTTTTAGTGAGATCAAACTGAAATTTCTCAAATGCGAATTCTATATTTGCTCAAATGATGCATAAATAGTTTTTACAATAATAATTTATGTTTACAGGTAAAAATGATTAATCTGT…
MsMYB195	MSAD_306780.t1	Medtr4g100630.1	At5g47390	At1g21060	PubMedID:27117388	MSAD_213582.t1	Medtr5g018820.1	√		√			√	√	√							√		ACCTTTGATATCTCTAGCATACCAATATAATACAATACTTTTTGTCACTTTTGGTGTGAACTCAATTACATGCCTTGTGTTAACCAAAAAACAGATCAAAGGGACATGTTTTGTTATACAAATTAAGTTAATTTGATAACCACTTATATCTTGCCTAAAATGATGACCGATGGGCTTGTATATCCAACAAAGAAGGTGTGTTAATTAACCAAATTAGAAGGGCAATTCGGTATACTCATTTTTAATCAACAAGCTCTCGGCCTATGGGATAGTTATGCTCCTTCAAATTAAGGTAATGCATGCATGTTCATGATTATAAGAAATGAATACATACATGATGGATTGGAAATTGAACATCAGTAAAGAATAATATATATATATATATTTAGCGTACCTATG…
MsMYB195	MSAD_306780.t1	Medtr4g100630.1	At5g47390	At1g75000	PubMedID:27117388	MSAD_308261.t1	Medtr5g019330.1			√	√			√	√		√						√	ATCACGAAAAAAGAAGTAACATTTTACCATCCATCTATTTGCTGCGAAATATTTAGGTCAAGTAAAGTATTGCCTATTGTGATCAACTTAAACTTGGATGGAAGTTTGGGAAGTTGTCCCATTATTTATATTTATTTAAATAATTAAGAACCCAGAGTTAAGACAAGGTTGTAAAATTGTGTGGCATCGAACCCTTCAAGTTATTGTTAGCAAGAGTTAAATTAACTAAACTTCTTAACTTGGAACTCACGAGGGAGATAGTTCAATCGCAAATTCCCAAGATTAACACACAATATTTTCTCTCCCACCCCTAATCATTATCTTGCAAGAACAAACATTATTCGAAAAATCCAAGTCCTACATCGGATAGATAAGACTATTGAGAAGAGTTTATAAAGA…
MsMYB195	MSAD_306780.t1	Medtr4g100630.1	At5g47390	At4g35985	PubMedID:27117388	MSAD_270054.t1	Medtr5g022450.1			√	√	√	√		√	√		√					√	TTATATTTTGATAACATATTTGTTTTGTATATTTGATGTAATTTATCATTAGAAAACTGACTTGTAATATTTTTTTAGTATACCCTTTCACACTCATCCGAATTTAGTTATCTAAACGAAGAAAGAAAAAACTCTATCATATTCACTCATTTGGATACATGAAAGAACACCCTTTGGTAAGAGAAAAATCGCTTATTTTTATATCGAGAGTCTAACTTTTCTATACAAAACAACTTCTAAAATATCGAGTGTCGTTGTTCGTAAACTCATTTAAGATCTTGTATTTATTCTACTTAAAATTTAGGTTTTATTTGTTCTTATTCAAATAATAAGCAAAATTATTTGGTTTAATTGGACTTTTGGTTCCTTAAGTAATTTGTTGTTTTCATTTTGGTCCTA…
MsMYB195	MSAD_306780.t1	Medtr4g100630.1	At5g47390	At1g10740	PubMedID:27117388	MSAD_219986.t1	Medtr5g033590.1		√					√	√				√					TAATAGCATTGTTACACAATAAAGGATATATTATATCTTATCCTAATTATAACATTATTTATAAAATAAAATAAAAATGTCGATAAATATAAAACTCTCTAATTTTTTAGATGGATTTATCTATTTTGACAAGTGCCATTTTAACTAAAAGTGTTTAAGATATGAAAATTGAGTTTGACATGACCATAAGACAAAAAACAATTTTAGGGTATTTGCAAGCAACAAACGCTCATGATTTTCTTTTGGGGAACAAGTCGTTCACTGTAAGAAGCTTCCTGACTTTAGATATATACATGAATATGTTTGGATGTCCTTTTTGATATATTCGGGCGGTGGGAGTATCGATGAAGATGTTATGGTGTACAGGTAGGAGGAAAGCATGCATAAATGGACTTGGTT…
MsMYB195	MSAD_306780.t1	Medtr4g100630.1	At5g47390	At1g13280	PubMedID:27117388	MSAD_212571.t1	Medtr5g053950.1			√				√	√							√	√	TATAATGTTTGAGAATGAATCTCAAGTTTGAAGATGTTTCTGATCTTTTTCAAGTAATCTTGATTTTCTTCTTTTGATCTTTTTGTGATCTGATTCTAATGTCTAAATGAGAGATCTTGGGTATGAGAGAGATTTATACTCTACATATGAATAATGATACCCTTTATAGAGTTTTGTCTTGGCGAGCAAGTCAAAAACTAACCATCGAGAACTAGCCATTGTTTTATCTTTTAGTGGTTTGCCTTCACGACCAAGAACTCTTGAAATTAGTCGTTAACCCTCATGCTTTGCTTTCCAGCTTTTGATTTTTCTGTGCACCTTTAGGCATGTTTCTTCCATTAATTCGTTTGACATTTTCTAAATTTGTGTTTCTGATGTCATTATGACATGCTTTTGATC…
MsMYB195	MSAD_306780.t1	Medtr4g100630.1	At5g47390	At4g08950	PubMedID:27117388	MSAD_247086.t1	Medtr5g064340.1				√		√	√	√									TTATTTTCGAAAATTTAATTCAATTGATAGGGACATTGCATAATTTATGCAGGGGTCGGGGTTTAAACCCCGAACACCACACTTCTTTCATTTATATGTGTGAGTTCCGACCACTAGGCAATTAGACAAAAAAAAAAGTGTTCTACAATAATAATTATGGATTACATGCATCATTAGTTGAATGAATATAAAAAGTTAAATTTATTTATAATTAGCAACAGATTAAGTATTACTCTAAACTTTGTAATTAATGCTTTTTAAATTTTGGCATTTCATAGCAACGTTTTAAATTAACTACTTTTTAATGATTTATTGATTACAATTGAATGAGAAATCAAAACAATATTTACAGGGATCAATTAAATTCATAAATACACTACAGAAGAGATAATATTTAAA…
MsMYB195	MSAD_306780.t1	Medtr4g100630.1	At5g47390	At5g49980	PubMedID:27117388	MSAD_221783.t1	Medtr5g065490.1			√				√	√				√					ATCTTCACTTAGGACTTCATATTGTCTCATCTCACATCTTTCATGAAGGTAATGGTTGTGCAAACAAGCTTGCTGATCATGGTCATGATGTTTAGGGATCTATTTGGTGGGAGACCTTGAGTATTTTTTTAAGGACCACTTTTGTTTGCCTAATTTTCTATTTCCTTAGGTCTCTTGTTTATTTTTCTTGCTTTCTTCTGGCCTTTTGAGGGTTTTGGTTCTGCCACCTCATGTATATATTTTTTCTTTTTTTAATATATATATATATATATATATATATATATATATATATATATATATATATATGCATCAGATGAGGGGTTTTTTGGAGATGTCAATTTAATTGGGAGTCCGAGCATCCCCTTGATGTTTGTCATTTCCCTTGAAAAAATTTCCCTC…
MsMYB195	MSAD_306780.t1	Medtr4g100630.1	At5g47390	At1g64230	PubMedID:27117388	MSAD_296554.t1	Medtr5g075580.1			√			√		√									TTAATGGTCGTACACATTGATGAGTCCAATTGCTACACGAAAATCATTCATATAAATATATATTTGGTTTGATATGTATGGATTGTCTAATTTTATCTAACAATCGTGATTTTTGACTAACTTATCACTATGTATGTTTTTATACATATATTTATTTCCCTTAAAAAATAAAATACAATTGATTTATCAATTCATAGACGTTAGTTAATTAAAACTAACCATGTATGTTTTTATACATATATTTATTTCCCTCTTTTGAGCCCTCTTGCACTTTTTCACGAGTGAGCTGTGAAACCTTTCTTATGCTTGCCTTGATAGGATTTGTTTATGTTTTATATTTTTATAAGTAGACATGTATTTCTTTGTATTTGTTCTCTTGTATTGTTGTATTCTTGTTTT…
MsMYB195	MSAD_306780.t1	Medtr4g100630.1	At5g47390	At1g77740	PubMedID:27117388	MSAD_218769.t1	Medtr5g459450.1			√	√	√	√	√	√			√				√		ATGTTTTCTTTGGGTTGGGGAGTGAATGACGAGGCTTAAAAGTAGCGTATGAGGTTGCTTGAAAGTAGCAATCAATAATCAGTGATGTCCTACGAATTGTGGTTCGAACAAGGATAAAGATCACTTGTTTGTTAAATGTGATTTTTTGGTAGAATTTGGTCTCTTATATCTAGTTGGATTGGTTTCTCTTCGTCTCTTCATTATAGTTTATTGAATCATCTAAATCAATTTGGTTAGATTATCCCTTAATATCATTTGGCTTTCTGTTGTTTGAGTTATTTGGAAAGAGTGTAACAGACGGATTTTTCAGTAGATGGAGGAAAACTTGTAGGCGCTTTGTGAAAGGGTGAAGCTTCGATCCATTTGGTGGTTTAAGTCAAAATATGTTTTATTCGACTT…
MsMYB195	MSAD_306780.t1	Medtr4g100630.1	At5g47390	At3g03060	PubMedID:27117388	MSAD_305650.t1	Medtr6g005760.1			√						√		√	√					TTTTTGATTCTTACATTATAGTGCACTATTTTATTTTATTACTAAAAGGCACTTATATTTTTTCATTATATGTCAGATATCAATAAAGATATAAAAACTAATAAAAGATGTTGCCGTTCTAGCAAGAAAGCTAACTCATCGATTTGTCTCATAGTAAATTCAAAATGAGTTTTAAATAAAGATCATAGTTATTTATTCTCTTCTTTATTTAGAAACCCATGTGTTACTAGAGTTTACTATTAGACATAGTAGACTCAAATAATTAGAGGATGAGTCTTACACTTCTCGAGAATCCTTCTAGTGGTATATTAAAGGATTTTATTATCACATTGGAAACTTCTCTGATGTGGTTGCTGATTTCTCAGGTGTGCTTCATGACTTTCGTCTATAAAATCAAAA…
MsMYB195	MSAD_306780.t1	Medtr4g100630.1	At5g47390	At3g01500	PubMedID:27117388	MSAD_263403.t1	Medtr6g006990.1			√	√			√	√			√	√			√		GAAGTTTGGAGAAGAGGGAAACAAATACTTTCGACATGCAACCGGGCAGATATATGCAATCTCTAAGGATTTGGCCACTTACATTTCCATTAACCAGTATGTATATGTTTCTTTACACAGTCCTTAATTTGGCAACCGAGGAACATTTTTGAATGGAAAATTAAAGTTTTAATCTACATTTTGTCTATGTGAGGAATGATAGTCCTGCAGATTTTATTGGAAGCAAAAAACTTATTTCTATGATTTGATTCAAGTGAAAAACTTTTACACAAGTTAAAATGTTTCTAAATATGAAATCTCAGCTTGTGACATATAATATTCTTTCTTACAAAAATTACAAATTTCATTGAGGTCCTCGTTATGATTGCAGGCCGATTTTACACAAATATGCGAATGAAG…
MsMYB195	MSAD_306780.t1	Medtr4g100630.1	At5g47390	At3g17770	PubMedID:27117388	MSAD_213101.t1	Medtr6g073003.1	√		√				√	√								√	ATTATTTTAAGTTTGGCTTATTGTATGATTAAATGTATAAATAAACCAAATGATTAAACAGTTCAACTAATTTGGCTTATTGTTGAAAATTGCAATTATAAGTTTGTGAGTAAAATGATTAAATTAAAAAAAAAAACAATTTTGATGAAATTTGGCTTATTATTAATTAAAATTATTTTAAAACATTTAATTATTTAATAAAAATTCGGTTTTATAAATAAAACATTTTTTTGAAAAATAATAATATATCATTTGTCAGGGGTTAAACCCCTCGCAAGTCCCTGGTATATACTGATCTGATTTGACCTTCCACCAGTTAGTAAGTGCGTCAGTCAGAGCAGACTGCACAGTTACAGAAAAAGTGAGGAAATATGTCAGGGTTAAGACAGGGAAAAAGCC…
MsMYB195	MSAD_306780.t1	Medtr4g100630.1	At5g47390	At3g24420	PubMedID:27117388	MSAD_248109.t1	Medtr6g086560.1					√	√	√	√				√					TTAAACATCACATATTCCCTAATAATTTTCCAAGGTTGTATAACTGCAGAAAAAAAGCAGATAACACTCTTGAAGGAACAACTTGGCAAATCAAGTTTGAACTAAGTGGTGTGATTCAAGGAGCTACATATAAACTCAGAGTTGCAATTGCATCTGCAACATTAGCTGAATTGCAGGTAAACTCCTGTTGTATGTAACATGATGGTGTTTCACCTTTTGAATTTCGTGCTGACATGTATAAATTGCCTGTGAAGATTCGAGTCAATGATCCCAATGCAAGGCGTCCCGTATTTACCACTGGATTAATAGGAAGGGAGAACTCAATTGCAAGACTAGGAATTCATGGACTCTATTGGCTGTACCATGTGAACATACCAAGTTCTCTTCTTATTGATGGCA…
MsMYB195	MSAD_306780.t1	Medtr4g100630.1	At5g47390	At4g29110	PubMedID:27117388	MSAD_216232.t1	Medtr6g088565.1								√									ATGCTTACTACTTTTAAAAATTATGAAAGAGTGATATTTAGGTGTGTCATCCGCTTAAAAACTCTTTCTAAGAGTTTTCAATTACAGATATTCTTGTTGTTTCCTAAAATTTTGTTTGGTAGTTTGGAGAAGAGGGGAATGAAAGACTTTGAGAACAGAAATATAAGATAAAATTTAAAAATCTTTCACATTTTTTAAAAGAGTGTTTTTTTAAAGAGTGATAAACTAATGTTTATAATTAATATATTTTAAATTTTGAGAATATTATAATAATATATATTAAATTTGAAGAATTTATACAAACCTTCTAAGACTCTCATCCAATACAATTTTTTAGTTCCCCTAAATGACGAAGGTTCTAATATTTTGAAGAAAAATAAGCCCCTCATCCCAATATCT…
MsMYB195	MSAD_306780.t1	Medtr4g100630.1	At5g47390	At5g56550	PubMedID:27117388	MSAD_309460.t1	Medtr6g090460.1				√			√		√		√	√					ATTTCTTCATTTATATTGCTTTCTTCGTCACGCTCAATCATATCTATAATATGTATATGTGTGTATATATAATGAGAATAATTGGTTTTTTCTTTTCCAATTATACTCTATAACAAATTTTGTTATAAGAATACCATATTTTTAGTGTTGGTCAAAAAGATAAGAATTTATATATATAATATTATATTTGTTACATTGCTGGTGTCATTGAAAAAGATATGTTTAGTTTTTTTAATAAGAAAAAGATATGCATAGTTTGTTACAATACAAATGTGTAAATTATATATAAGTATAATTTTTTTAGGCAACTACACTTGTACTTTTAATTAAAATCAAAATTTTATAAAAATAATTATACGCATTACACAACACTAACAAAAATTATACGCATTAGCATAA…
MsMYB195	MSAD_306780.t1	Medtr4g100630.1	At5g47390	At3g23920	PubMedID:27117388	MSAD_326978.t1	Medtr6g477780.1	√		√		√							√	√				TCCATCGCACCGGTTCGAATTTTCCATCTACGCGTTACTAATAATAATAATAAAAATTAATATTTAATATTTATTTCTTTTTAGAGAAATAGAGGGCATATGTAATGTTCTGGATTGGCTAAAACCCTGATGCCCAATTACTTAAGCCCATTACAAATACAGCCTAAATTCCACATTTTGCAAGATTACCCCGTAACACAACCTTCCCCGCGAGGAGGATGCTCAGAGCAACCGAGGCCAATTCAAATGAATTGTAACGTCTCCTTCCACACTCCCGAAATATGCTGTTACAATTCCTACTAATTCGTAACCGTCGGGCACACGTGTGCCTTACAATGACTCTGCAAACACTCACCTCTATATAAAGGGGACTCTTCGCAGTCCCCAAGGTAGAATCAT…
MsMYB195	MSAD_306780.t1	Medtr4g100630.1	At5g47390	At5g02160	PubMedID:27117388	MSAD_288098.t1	Medtr7g062470.1				√			√	√									ACTATCTCTCACGTGTGTCTTTAGGTGCTCTGATACGTAACGGGATGGGAACCTTTGTTGCATGCTTTTCTATTCCTTACGTATTGAATATGAATTTACATGACTATGTTTTAGATTGGATTTTTTTATGAGATGTTTGATGAGACCTTCGTGCCAAGACTATTTTTAGATGTTAAATTAATCCGCTGCGAAGTATTAAATATGTTGCTGGATTTTTGAAGAATAAGTTGTTATTTATTTCCGTTTATGATTTTAAGAAGTATAGCATTCCGTTTATGTGGAAAACTCTGATAATTGTTATGAAATTTTTATGTTGGGAAAACGGGGTGTTACAGTCGATCCATTCGCCATAATTAAACTCTACTTGTTCTATATAGAGGTTCACTTTCCATTCTTTTT…
MsMYB195	MSAD_306780.t1	Medtr4g100630.1	At5g47390	At4g01310	PubMedID:27117388	MSAD_314233.t1	Medtr7g078800.1			√	√	√	√	√	√						√			AATTTCTGTTATATTTTTTCTTAATAATTTAATTTAAATTTCTTGTTGTTTTCATGGGTATATGATTTTTATTAGTAGATAGATGAAGTGACAAATAATCATTTAAACTTAAACACATAAATAATTATCGAAGTTCAAACCCAATCACGATATTCAACCTTATAATTTTGGTATTTTGTCAGGTGAACTAGAACTTGCGGATTTCTATATATGATTTCTAGTAGCGACTATGCAGACAATTTTTTTAGGGAAAAGTGGCTATGTGCATATGACCTCTTAATTTTAATTGTAGACCCTGCTTAGTAAATTAAATTAAATTAAAATAGACGAGTTTAATGAAATATATACAGTGATGTAAAGTTATTGGTGGCAACTCGGATAGTATATATACATACACTT…
MsMYB195	MSAD_306780.t1	Medtr4g100630.1	At5g47390	At4g12800	PubMedID:27117388	MSAD_314129.t1	Medtr7g079900.1			√	√			√	√				√			√		CAGCCCATGAAGAAAAAAAAACCAGCCACATGAAATGCTATGATCGAACATGGCCAACTTAATAAATTTTGTTTATAGGCGACATCTAAAACAAATTTTAATAGATGAGGCTTTTTGTTAATAAAATCTAATGAAAAATATATATTTTTTTGAAAAGCCTAAAAAGAAGGTTTTAATAGCCTTATCTTTGAACAGACCCTATGATTGAAAAAGTAAAAAAGTTTAGAATACATAAAACATACCAAAATATGTAACCAAAAAAAGAAAAAAACCAAAATAATGGTGCCATTAAAACCAAGAAAAAAAAAATCTGAAAATCAAATTACTATCAAGTTGGATTGGTTCGAGTCATCGAATCTATAAACCGACCCACGCTATAAACACCCCTATTCACATTTT…
MsMYB195	MSAD_306780.t1	Medtr4g100630.1	At5g47390	At3g25480	PubMedID:27117388	MSAD_264917.t1	Medtr7g080890.1	√	√	√	√			√	√			√						TTTTTATGGTGGTTAATAACCATACATATGAATAGTTGTAATACGTTAACATATTAGTTTAGCAAACTATAGTCATTTAGCGCAGTTAGTATGAACAATGTATAATATATGCAAGGTTCGAGGTTTAAATTCCGACCACCACGAAAAAAACTAATAATCATTTAAGGTTTTTCACATAGATTAAGAGAGATAATATGGACAAATGAATAAATGAAATAATTTTACAAAATTGCCCATGGTAATTGTTGATTATTAACAATTGCCATAAGTGCATAAGTTAAATTTAATAACTTGAATTGAAAATGGTACACATAAAAGTGATGTTGGGTAGACTTGGAAAAAAAATTAATTCATTTTGCATCGAAAATGTAAAAGACAATAATAAAAAAAAGTGTAAAC…
MsMYB195	MSAD_306780.t1	Medtr4g100630.1	At5g47390	At3g56910	PubMedID:27117388	MSAD_301999.t1	Medtr7g088520.1			√	√			√	√			√			√			TTTTATGGTGGAATTAAAAAGGAACACTGATTTTACTATAATCTAACTACACTATATTATTTTGAGCAATGCTATATATCAAGAAAGATTTTATCAAGAAAATTTCAAGAATGACATGACAGAATAATCACCCTTAGATTTTATCAAGAAATAGTCCTGAAATTAATGTTAACCAATAAAATCTCAGCCTGGCCGGAAATCATGGGGTGGTGGGTGTTATGTATCTTTTTTTTATGAAAGATTAATAAATGAAACTGAAATCTAAATGTGATTATTGTGCCATGTCATTCTTGAATTTTTCTTATAAAATCATTCTTGATATCTAGCATTTTCCTATTATTTTACTTGTCTTCAACCTCTCATCCATGATTCTTTCAAAAAAAAAAAAAAACAAACCTC…
MsMYB195	MSAD_306780.t1	Medtr4g100630.1	At5g47390	At4g28530	PubMedID:27117388	MSAD_256799.t1	Medtr7g097090.1			√	√	√		√	√	√	√		√				√	TTTAAAATTCGGATGTGAAACTTCATGAGAAAAGTATTTAGCCACCGTCACCAATGCAACATTAATGTTACTTTTTCAATTGTAACCTTAACTATTTATTATTATTTTTTCTTTCAATTCTTTCATTTATCTTTCCCATATTATTTATTAAGGATAATTTTGTAAAACAACTCATAATATCTTTCTTCCACACAATATTAATTGCATTTCTTAATATGTGTGAAATGCCCAAAACGTCATACAATTTGGGACGGAGGGAGTATATTTAATGAGAAATGCTAAAGAAATATTGTATTGAAAAATGGTGAAAAGTGGTGAATTTAAATTTTTAAAAGTCAGAATATTGTTGAATTCAATGCAAACATTCTACTTTTAGTTTCCTTAACCATTGCCCTGCAG…
[truncated: 170 more rows]
