# Supplementary material for: MYB transcription factors in alfalfa (Medicago sativa): genome-wide identification and expression analysis under abiotic stresses
Source: PeerJ. 2019 Sep 17;7:e7714. doi: 10.7717/peerj.7714 (PMC6753925; doi:10.7717/peerj.7714)
Supplement: Supplemental Information 17 — The expression levels of these interaction genes with the absolute value of fold change ≥ 2. [file peerj-07-7714-s017.xlsx]

## Sheet: Sheet1
Table S10. Correlation analysis between the expression patterns of MsMYB genes and their interaction genes during abiotic stresses, which were obtained by the prediction of protein-protein interactions.
Gene name (Ms gene 1)	Ms gene 1	Ms gene 2	ABA	Drought	Salt	Cold
MsMYB035	MSAD_232883.t1	MSAD_263875.t1	-0.863172	-0.52209	0.0443711	0
MsMYB035	MSAD_232883.t1	MSAD_308489.t1	-0.715986	-0.0966621	0.405592	0.656003
MsMYB035	MSAD_232883.t1	MSAD_320162.t1	0.861552	0.631262	-0.61885	0.45632
MsMYB035	MSAD_232883.t1	MSAD_330884.t1	-0.387305	0.359018	-0.398894	0.537678
MsMYB040	MSAD_233710.t1	MSAD_308489.t1	0.270173	-0.0882152	-0.375005	0.512331
MsMYB040	MSAD_233710.t1	MSAD_320162.t1	-0.342138	0.525281	-0.741551	0.0564308
MsMYB041	MSAD_234746.t1	MSAD_220095.t1	0.331361	-0.0243952	-0.527238	-0.527953
MsMYB043	MSAD_235749.t1	MSAD_240341.t1	-0.245673	0.00584775	-0.12242	0.658461
MsMYB043	MSAD_235749.t1	MSAD_320162.t1	0.132247	-0.300964	-0.790968	0.913987
MsMYB045	MSAD_237419.t1	MSAD_212066.t1	0	0	-0.284075	0
MsMYB045	MSAD_237419.t1	MSAD_212939.t1	0	0	0.163753	0
MsMYB045	MSAD_237419.t1	MSAD_213556.t1	0	0	0.163151	0
MsMYB045	MSAD_237419.t1	MSAD_215893.t1	0	0	0.353045	0
MsMYB045	MSAD_237419.t1	MSAD_217714.t1	0	0	-0.198893	0
MsMYB045	MSAD_237419.t1	MSAD_218167.t1	0	0	-0.264781	0
MsMYB045	MSAD_237419.t1	MSAD_220956.t1	0	0	0.374093	0
MsMYB045	MSAD_237419.t1	MSAD_223480.t1	0	0	0.620008	0
MsMYB045	MSAD_237419.t1	MSAD_223636.t1	0	0	-0.323111	0
MsMYB045	MSAD_237419.t1	MSAD_224388.t1	0	0	-0.300199	0
MsMYB045	MSAD_237419.t1	MSAD_225067.t1	0	0	-0.155344	0
MsMYB045	MSAD_237419.t1	MSAD_225780.t1	0	0	-0.191757	0
MsMYB045	MSAD_237419.t1	MSAD_229897.t1	0	0	-0.366748	0
MsMYB045	MSAD_237419.t1	MSAD_234633.t1	0	0	-0.399721	0
MsMYB045	MSAD_237419.t1	MSAD_235025.t1	0	0	-0.791003	0
MsMYB045	MSAD_237419.t1	MSAD_235650.t1	0	0	0.786927	0
MsMYB045	MSAD_237419.t1	MSAD_236691.t1	0	0	0.444843	0
MsMYB045	MSAD_237419.t1	MSAD_236795.t1	0	0	-0.283876	0
MsMYB045	MSAD_237419.t1	MSAD_237154.t1	0	0	-0.22066	0
MsMYB045	MSAD_237419.t1	MSAD_237277.t1	0	0	0.142209	0
MsMYB045	MSAD_237419.t1	MSAD_238837.t1	0	0	-0.101479	0
MsMYB045	MSAD_237419.t1	MSAD_238965.t1	0	0	-0.191162	0
MsMYB045	MSAD_237419.t1	MSAD_241219.t1	0	0	-0.272131	0
MsMYB045	MSAD_237419.t1	MSAD_241628.t1	0	0	0.0532254	0
MsMYB045	MSAD_237419.t1	MSAD_242540.t1	0	0	-0.369488	0
MsMYB045	MSAD_237419.t1	MSAD_242667.t1	0	0	-0.393867	0
MsMYB045	MSAD_237419.t1	MSAD_244919.t1	0	0	-0.271419	0
MsMYB045	MSAD_237419.t1	MSAD_245164.t1	0	0	-0.146686	0
MsMYB045	MSAD_237419.t1	MSAD_245804.t1	0	0	0.0954084	0
MsMYB045	MSAD_237419.t1	MSAD_245928.t1	0	0	-0.602129	0
MsMYB045	MSAD_237419.t1	MSAD_247630.t1	0	0	0.250554	0
MsMYB045	MSAD_237419.t1	MSAD_248746.t1	0	0	-0.198876	0
MsMYB045	MSAD_237419.t1	MSAD_249005.t1	0	0	-0.383163	0
MsMYB045	MSAD_237419.t1	MSAD_249490.t1	0	0	0.620008	0
MsMYB045	MSAD_237419.t1	MSAD_250523.t1	0	0	-0.613124	0
MsMYB045	MSAD_237419.t1	MSAD_252464.t1	0	0	-0.232823	0
MsMYB045	MSAD_237419.t1	MSAD_254419.t1	0	0	-0.225557	0
MsMYB045	MSAD_237419.t1	MSAD_255941.t1	0	0	0.114101	0
MsMYB045	MSAD_237419.t1	MSAD_256283.t1	0	0	-0.224315	0
MsMYB045	MSAD_237419.t1	MSAD_256603.t1	0	0	0.299489	0
MsMYB045	MSAD_237419.t1	MSAD_256627.t1	0	0	0.982664	0
MsMYB045	MSAD_237419.t1	MSAD_259338.t1	0	0	-0.55723	0
MsMYB045	MSAD_237419.t1	MSAD_260155.t1	0	0	-0.263513	0
MsMYB045	MSAD_237419.t1	MSAD_261036.t1	0	0	-0.148596	0
MsMYB045	MSAD_237419.t1	MSAD_262420.t1	0	0	-0.658397	0
MsMYB045	MSAD_237419.t1	MSAD_262936.t1	0	0	-0.365389	0
MsMYB045	MSAD_237419.t1	MSAD_264245.t1	0	0	0.341251	0
MsMYB045	MSAD_237419.t1	MSAD_264808.t1	0	0	-0.218131	0
MsMYB045	MSAD_237419.t1	MSAD_269138.t1	0	0	0.296993	0
MsMYB045	MSAD_237419.t1	MSAD_270178.t1	0	0	-0.238699	0
MsMYB045	MSAD_237419.t1	MSAD_271007.t1	0	0	-0.240121	0
MsMYB045	MSAD_237419.t1	MSAD_272045.t1	0	0	-0.304421	0
MsMYB045	MSAD_237419.t1	MSAD_272494.t1	0	0	-0.472353	0
MsMYB045	MSAD_237419.t1	MSAD_273189.t1	0	0	-0.338019	0
MsMYB045	MSAD_237419.t1	MSAD_274062.t1	0	0	-0.0472456	0
MsMYB045	MSAD_237419.t1	MSAD_274368.t1	0	0	-0.217424	0
MsMYB045	MSAD_237419.t1	MSAD_275388.t1	0	0	-0.116442	0
MsMYB045	MSAD_237419.t1	MSAD_275795.t1	0	0	-0.286454	0
MsMYB045	MSAD_237419.t1	MSAD_277954.t1	0	0	0.0669435	0
MsMYB045	MSAD_237419.t1	MSAD_278960.t1	0	0	-0.420755	0
MsMYB045	MSAD_237419.t1	MSAD_279599.t1	0	0	-0.330227	0
MsMYB045	MSAD_237419.t1	MSAD_280728.t1	0	0	-0.333681	0
MsMYB045	MSAD_237419.t1	MSAD_282838.t1	0	0	-0.0351965	0
MsMYB045	MSAD_237419.t1	MSAD_282941.t1	0	0	-0.299218	0
MsMYB045	MSAD_237419.t1	MSAD_283672.t1	0	0	0.0288942	0
MsMYB045	MSAD_237419.t1	MSAD_286622.t1	0	0	-0.218383	0
MsMYB045	MSAD_237419.t1	MSAD_288139.t1	0	0	-0.737462	0
MsMYB045	MSAD_237419.t1	MSAD_288558.t1	0	0	0	0
MsMYB045	MSAD_237419.t1	MSAD_290562.t1	0	0	-0.41102	0
MsMYB045	MSAD_237419.t1	MSAD_291169.t1	0	0	0.653301	0
MsMYB045	MSAD_237419.t1	MSAD_291380.t1	0	0	0.369508	0
MsMYB045	MSAD_237419.t1	MSAD_292056.t1	0	0	-0.48762	0
MsMYB045	MSAD_237419.t1	MSAD_294583.t1	0	0	-0.142857	0
MsMYB045	MSAD_237419.t1	MSAD_296086.t1	0	0	-0.293456	0
MsMYB045	MSAD_237419.t1	MSAD_296233.t1	0	0	0.0226916	0
MsMYB045	MSAD_237419.t1	MSAD_299206.t1	0	0	-0.44965	0
MsMYB045	MSAD_237419.t1	MSAD_300883.t1	0	0	-0.460355	0
MsMYB045	MSAD_237419.t1	MSAD_301590.t1	0	0	-0.492464	0
MsMYB045	MSAD_237419.t1	MSAD_302592.t1	0	0	0.659253	0
MsMYB045	MSAD_237419.t1	MSAD_302842.t1	0	0	0.29894	0
MsMYB045	MSAD_237419.t1	MSAD_303222.t1	0	0	-0.268504	0
MsMYB045	MSAD_237419.t1	MSAD_303603.t1	0	0	-0.554717	0
MsMYB045	MSAD_237419.t1	MSAD_303628.t1	0	0	-0.0404871	0
MsMYB045	MSAD_237419.t1	MSAD_304533.t1	0	0	-0.16672	0
MsMYB045	MSAD_237419.t1	MSAD_305678.t1	0	0	-0.202264	0
MsMYB045	MSAD_237419.t1	MSAD_306833.t1	0	0	-0.512452	0
MsMYB045	MSAD_237419.t1	MSAD_307413.t1	0	0	-0.279602	0
MsMYB045	MSAD_237419.t1	MSAD_308287.t1	0	0	-0.16697	0
MsMYB045	MSAD_237419.t1	MSAD_309237.t1	0	0	-0.44965	0
MsMYB045	MSAD_237419.t1	MSAD_309274.t1	0	0	0.00878043	0
MsMYB045	MSAD_237419.t1	MSAD_310622.t1	0	0	-0.336097	0
MsMYB045	MSAD_237419.t1	MSAD_310700.t1	0	0	-0.18194	0
MsMYB045	MSAD_237419.t1	MSAD_311541.t1	0	0	-0.486211	0
MsMYB045	MSAD_237419.t1	MSAD_315170.t1	0	0	-0.322839	0
MsMYB045	MSAD_237419.t1	MSAD_316428.t1	0	0	-0.268504	0
MsMYB045	MSAD_237419.t1	MSAD_316769.t1	0	0	0.192513	0
MsMYB045	MSAD_237419.t1	MSAD_317423.t1	0	0	-0.272276	0
MsMYB045	MSAD_237419.t1	MSAD_317635.t1	0	0	0	0
MsMYB045	MSAD_237419.t1	MSAD_317649.t1	0	0	-0.224566	0
MsMYB045	MSAD_237419.t1	MSAD_319547.t1	0	0	-0.152935	0
MsMYB045	MSAD_237419.t1	MSAD_320414.t1	0	0	-0.176593	0
MsMYB045	MSAD_237419.t1	MSAD_321477.t1	0	0	-0.630343	0
MsMYB045	MSAD_237419.t1	MSAD_322493.t1	0	0	-0.41517	0
MsMYB045	MSAD_237419.t1	MSAD_323498.t1	0	0	0.188528	0
MsMYB045	MSAD_237419.t1	MSAD_324756.t1	0	0	-0.299218	0
MsMYB045	MSAD_237419.t1	MSAD_326387.t1	0	0	0.227305	0
MsMYB045	MSAD_237419.t1	MSAD_328272.t1	0	0	0	0
MsMYB045	MSAD_237419.t1	MSAD_328414.t1	0	0	-0.437446	0
MsMYB045	MSAD_237419.t1	MSAD_332716.t1	0	0	-0.224566	0
MsMYB064	MSAD_245323.t1	MSAD_308489.t1	-0.853553	-0.218987	0.365098	-0.907973
MsMYB064	MSAD_245323.t1	MSAD_330884.t1	-0.192833	0.525664	0.57976	-0.689454
MsMYB076	MSAD_249275.t1	MSAD_232019.t1	0.0551887	-0.440686	-0.0264283	-0.898983
MsMYB076	MSAD_249275.t1	MSAD_308489.t1	-0.32355	-0.150514	-0.301384	0.504501
MsMYB076	MSAD_249275.t1	MSAD_320162.t1	-0.743946	-0.666992	-0.690582	0.499781
MsMYB076	MSAD_249275.t1	MSAD_330884.t1	0.851109	-0.102983	-0.133698	0.678327
MsMYB081	MSAD_250377.t1	MSAD_263875.t1	-0.412985	-0.324672	0.119236	0
MsMYB081	MSAD_250377.t1	MSAD_308489.t1	-0.959818	-0.279733	0.0469237	0.382858
MsMYB081	MSAD_250377.t1	MSAD_314241.t1	-0.412985	-0.324672	0.119236	0
MsMYB081	MSAD_250377.t1	MSAD_320162.t1	0.41639	0.298363	0.672215	0.808248
MsMYB099	MSAD_260349.t1	MSAD_267845.t1	-0.180032	0	0	0.599862
MsMYB099	MSAD_260349.t1	MSAD_320162.t1	0.328695	-0.0124223	0.440127	-0.418464
MsMYB105	MSAD_263886.t1	MSAD_320162.t1	-0.756501	-0.524065	-0.72058	-0.578562
MsMYB113	MSAD_268202.t1	MSAD_240341.t1	0.924976	0.216486	0.591008	-0.290183
MsMYB113	MSAD_268202.t1	MSAD_278175.t1	0.412678	-0.356393	-0.368066	-0.870814
MsMYB113	MSAD_268202.t1	MSAD_320278.t1	0.412678	-0.356393	-0.368066	-0.870814
MsMYB118	MSAD_270934.t1	MSAD_263875.t1	0.58864	0.0661484	0.0949293	0
MsMYB118	MSAD_270934.t1	MSAD_308489.t1	-0.298056	-0.436147	-0.185388	0.537624
MsMYB118	MSAD_270934.t1	MSAD_320162.t1	-0.54442	-0.661886	-0.924475	0.869295
MsMYB118	MSAD_270934.t1	MSAD_330884.t1	0.808088	-0.105867	-0.545316	0.687338
MsMYB132	MSAD_278758.t1	MSAD_320162.t1	0.70975	0.100924	-0.540947	0.276871
MsMYB137	MSAD_283540.t1	MSAD_308489.t1	-0.927084	0.118937	0.63251	-0.937454
MsMYB137	MSAD_283540.t1	MSAD_320162.t1	-0.00567727	-0.810798	-0.417825	-0.741285
MsMYB141	MSAD_284068.t1	MSAD_263875.t1	0.344559	-0.452494	-0.062738	0
MsMYB141	MSAD_284068.t1	MSAD_308489.t1	0.579977	0.0710385	0.398477	-0.101559
MsMYB141	MSAD_284068.t1	MSAD_320162.t1	-0.396797	0.732028	0.858201	0.338576
MsMYB141	MSAD_284068.t1	MSAD_330884.t1	-0.0848594	0.703308	0.372114	0.428778
MsMYB144	MSAD_284137.t1	MSAD_320162.t1	-0.396797	-0.0461145	-0.128522	0.362975
MsMYB144	MSAD_284137.t1	MSAD_330884.t1	-0.0848594	0.474186	-0.173479	0.31694
MsMYB153	MSAD_287819.t1	MSAD_278175.t1	-0.0883977	-0.409594	-0.481304	-0.0314542
MsMYB153	MSAD_287819.t1	MSAD_320278.t1	-0.0883977	-0.409594	-0.481304	-0.0314542
MsMYB184	MSAD_303035.t1	MSAD_264134.t1	0.528465	0.0888065	0.387884	-0.101109
MsMYB184	MSAD_303035.t1	MSAD_320162.t1	0.0843666	-0.308312	0.0237208	0.576858
MsMYB195	MSAD_306780.t1	MSAD_211058.t1	-0.708783	-0.759985	-0.687779	0.952789
MsMYB195	MSAD_306780.t1	MSAD_330884.t1	0.630752	-0.402387	-0.626724	0.644321
MsMYB200	MSAD_309143.t1	MSAD_308489.t1	0.798918	-0.211768	0.470483	-0.905809
MsMYB200	MSAD_309143.t1	MSAD_320162.t1	0.347923	0.567005	0.290167	-0.557665
MsMYB202	MSAD_309615.t1	MSAD_330884.t1	0.638528	-0.177712	-0.259997	0.498969
MsMYB204	MSAD_310752.t1	MSAD_320162.t1	-0.709166	-0.0487474	-0.863464	0.928679
MsMYB206	MSAD_312008.t1	MSAD_314241.t1	-0.00321592	0.704369	0.413313	0
MsMYB232	MSAD_317146.t1	MSAD_320162.t1	0.447721	0.483098	-0.580314	0.570376
MsMYB237	MSAD_320771.t1	MSAD_232019.t1	-0.912406	0.669572	0.425108	-0.656082
MsMYB237	MSAD_320771.t1	MSAD_308489.t1	-0.861166	-0.511026	-0.459592	0.808731
MsMYB237	MSAD_320771.t1	MSAD_320162.t1	0.447721	0.7345	0.573528	0.700722
MsMYB237	MSAD_320771.t1	MSAD_330884.t1	0.0207989	0.18521	0.452768	0.646471
MsMYB253	MSAD_326870.t1	MSAD_220095.t1	-0.631543	0.0793717	0.031021	0.851752
MsMYB253	MSAD_326870.t1	MSAD_308489.t1	-0.0738398	-0.634766	-0.589897	0.45106
MsMYB253	MSAD_326870.t1	MSAD_318785.t1	-0.867013	0.236771	-0.143128	0.945462
MsMYB253	MSAD_326870.t1	MSAD_320162.t1	0.471634	0.116322	0.0309288	0.819334
MsMYB265	MSAD_332735.t1	MSAD_212134.t1	0.00594066	0.31217	0.109893	0.983149
MsMYB265	MSAD_332735.t1	MSAD_247676.t1	-0.571177	-0.169233	0.534246	-0.653553
MsMYB265	MSAD_332735.t1	MSAD_268697.t1	0.989007	0.714224	0.788868	-0.566765
