# Supplementary material for: MYB transcription factors in alfalfa (Medicago sativa): genome-wide identification and expression analysis under abiotic stresses
Source: PeerJ. 2019 Sep 17;7:e7714. doi: 10.7717/peerj.7714 (PMC6753925; doi:10.7717/peerj.7714)
Supplement: Supplemental Information 19 — The MtMYB genes are homologous genes of the MsMYB genes. [file peerj-07-7714-s019.xlsx]

## Sheet: Sheet1
Table S12. Comparative analysis between the MsMYB and MtMYB genes.
Subgroups	MsMYB genes		MtMYB genes	Biological process
A	MsMYB166	MSAD_297817.t1	Medtr0001s0360.1	Response to jasmonic acid; regulation of anthocyanin biosynthetic process
	MsMYB251	MSAD_326154.t1	Medtr5g078910.1, Medtr5g079290.1
	MsMYB168	MSAD_297825.t1	Medtr5g079220.1
	MsMYB252	MSAD_326158.t1	Medtr5g078950.1
	MsMYB059	MSAD_244071.t1	Medtr5g078800.1
	MsMYB164	MSAD_297806.t1	Medtr5g078860.1
	MsMYB165	MSAD_297814.t1	Medtr0247s0040.1, Medtr5g079120.1, Medtr7g017260.1, Medtr8g060940.1
	MsMYB250	MSAD_326153.t1
	MsMYB167	MSAD_297821.t1	Medtr0193s0090.1, Medtr5g078930.1
	MsMYB186	MSAD_304545.t1	Medtr0197s0010.1
	MsMYB009	MSAD_219073.t1	Medtr8g020490.1
	MsMYB060	MSAD_244193.t1
	MsMYB078	MSAD_249753.t1	Medtr4g100720.1
	MsMYB136	MSAD_280666.t1	Medtr4g125520.1
	MsMYB156	MSAD_290181.t1	Medtr7g010210.1, Medtr7g010210.2
	MsMYB246	MSAD_323445.t1	Medtr6g012180.1
	MsMYB050	MSAD_239180.t1	Medtr7g087130.1
	MsMYB205	MSAD_311642.t1	Medtr0140s0030.1, Medtr0489s0020.1
	MsMYB110	MSAD_266003.t1
	MsMYB261	MSAD_330011.t1	Medtr3g039990.1
B	MsMYB028	MSAD_228168.t1	Medtr8g027345.1	Flavonol biosynthetic process
	MsMYB236	MSAD_319681.t1	Medtr7g117730.1
	MsMYB153	MSAD_287819.t1	Medtr3g083540.1
	MsMYB147	MSAD_285239.t1	Medtr7g109320.1
	MsMYB033	MSAD_231836.t1
	MsMYB090	MSAD_255431.t1	Medtr2g034790.1
	MsMYB155	MSAD_289628.t1	Medtr4g121460.1
C	MsMYB177	MSAD_300052.t1	Medtr1g076150.1	Response to salt stress; response to ethylene; response to auxin; response to salicylic acid; response to jasmonic acid; cell differentiation
	MsMYB184	MSAD_303035.t1	Medtr1g043050.1, Medtr1g043080.1
	MsMYB061	MSAD_244470.t1	Medtr7g115650.1
	MsMYB092	MSAD_256812.t1	Medtr7g096930.1
	MsMYB088	MSAD_254836.t1	Medtr1g100653.1
	MsMYB126	MSAD_274867.t1	Medtr2g067420.1
	MsMYB247	MSAD_323908.t1
	MsMYB017	MSAD_221977.t1	Medtr0063s0090.1
	MsMYB264	MSAD_330802.t1	Medtr0008s0280.1
	MsMYB056	MSAD_242995.t1
	MsMYB096	MSAD_258280.t1
	MsMYB149	MSAD_286691.t1	Medtr2g089420.1
	MsMYB095	MSAD_258275.t1	Medtr2g089450.1
	MsMYB030	MSAD_228866.t1	Medtr0251s0050.1
	MsMYB263	MSAD_330785.t1	Medtr0008s0390.1
	MsMYB187	MSAD_304548.t1	Medtr0008s0470.1
D	MsMYB111	MSAD_267151.t1	Medtr5g078140.1	Response to abscisic acid; cell differentiation
	MsMYB238	MSAD_320826.t1	Medtr3g065440.1
	MsMYB196	MSAD_306905.t1	Medtr4g102380.1
	MsMYB005	MSAD_214975.t1
	MsMYB171	MSAD_298548.t1
	MsMYB034	MSAD_232444.t1	Medtr7g076740.1
	MsMYB133	MSAD_279067.t1	Medtr8g031360.1
	MsMYB010	MSAD_219184.t1
	MsMYB229	MSAD_316746.t1	Medtr5g042030.1
	MsMYB228	MSAD_316745.t1
	MsMYB102	MSAD_260968.t1	Medtr7g011170.1
	MsMYB234	MSAD_319099.t1
	MsMYB093	MSAD_257884.t1	Medtr4g082230.1, Medtr4g082290.1
	MsMYB245	MSAD_323398.t1	Medtr6g012690.1
	MsMYB002	MSAD_211364.t1	Medtr4g073420.1
	MsMYB074	MSAD_248375.t1	Medtr8g095390.1
	MsMYB113	MSAD_268202.t1	Medtr3g097450.1
	MsMYB075	MSAD_249029.t1	Medtr4g485530.1
	MsMYB013	MSAD_220982.t1	Medtr2g011660.1
	MsMYB230	MSAD_316849.t1	Medtr4g091490.1
	MsMYB131	MSAD_278317.t1	Medtr5g079670.1
	MsMYB169	MSAD_297845.t1
	MsMYB006	MSAD_217691.t1	Medtr2g089620.1
	MsMYB150	MSAD_286699.t1
	MsMYB116	MSAD_270455.t1	Medtr5g029840.1
	MsMYB137	MSAD_283540.t1	Medtr3g074520.1
	MsMYB152	MSAD_287694.t1	Medtr5g007370.1
	MsMYB057	MSAD_243112.t1	Medtr4g478180.1
E	MsMYB085	MSAD_252816.t1		Response to gibberellin; response to salicylic acid
	MsMYB254	MSAD_327112.t1	Medtr6g009430.1
	MsMYB064	MSAD_245323.t1	Medtr3g461490.1
	MsMYB054	MSAD_241910.t1	Medtr6g090405.1
	MsMYB202	MSAD_309615.t1	Medtr7g102110.1
	MsMYB239	MSAD_320931.t1	Medtr4g057635.1
	MsMYB025	MSAD_224151.t1	Medtr2g095520.1
	MsMYB100	MSAD_260360.t1
	MsMYB117	MSAD_270884.t1	Medtr1g017000.1
	MsMYB208	MSAD_312555.t1	Medtr4g128670.1
	MsMYB018	MSAD_222238.t1	Medtr3g103570.1
	MsMYB099	MSAD_260349.t1	Medtr1g017140.1
	MsMYB097	MSAD_258507.t1	Medtr4g097570.1, Medtr4g097570.2
	MsMYB048	MSAD_238819.t1	Medtr5g014990.1
F	MsMYB209	MSAD_312855.t1	Medtr8g017540.1	Positive regulation of syringal lignin biosynthetic process; regulation of secondary cell wall biogenesis
	MsMYB211	MSAD_312858.t1	Medtr8g017440.1
	MsMYB210	MSAD_312856.t1	Medtr8g017500.1
	MsMYB212	MSAD_312869.t1	Medtr8g017340.1, Medtr8g017350.1, Medtr8g017390.1
	MsMYB024	MSAD_223829.t1	Medtr2g099740.1
	MsMYB170	MSAD_298327.t1	Medtr8g098860.1
	MsMYB199	MSAD_308941.t1	Medtr5g010020.1
	MsMYB241	MSAD_322217.t1	Medtr2g064160.1
	MsMYB016	MSAD_221678.t1
	MsMYB032	MSAD_231710.t1	Medtr2g097910.1
	MsMYB052	MSAD_239320.t1	Medtr4g065017.1
	MsMYB120	MSAD_271189.t1	Medtr3g028740.1
	MsMYB066	MSAD_247049.t1	Medtr6g055910.1
	MsMYB089	MSAD_254848.t1	Medtr1g100667.1
	MsMYB023	MSAD_223436.t1	Medtr7g111290.1
	MsMYB194	MSAD_306322.t1
	MsMYB027	MSAD_227519.t1
	MsMYB004	MSAD_213535.t1
	MsMYB079	MSAD_249873.t1	Medtr1g112760.1, Medtr3g077110.1
	MsMYB130	MSAD_276939.t1
	MsMYB042	MSAD_235617.t1	Medtr4g105130.1
	MsMYB101	MSAD_260526.t1
	MsMYB139	MSAD_283997.t1	Medtr1g085040.1
	MsMYB140	MSAD_284029.t1
	MsMYB022	MSAD_223406.t1	Medtr7g110830.1
	MsMYB220	MSAD_314215.t1
	MsMYB141	MSAD_284068.t1	Medtr1g085640.1
	MsMYB203	MSAD_310604.t1
G	MsMYB069	MSAD_247769.t1		Response to chitin; cell differentiation
	MsMYB072	MSAD_247825.t1	Medtr5g062790.1, Medtr5g088080.1, Medtr5g088150.1, Medtr5g088640.1, Medtr5g488210.1
	MsMYB001	MSAD_210823.t1
	MsMYB260	MSAD_329033.t1	Medtr5g488170.1
	MsMYB138	MSAD_283937.t1	Medtr1g085880.1
	MsMYB142	MSAD_284078.t1	Medtr1g085770.1
	MsMYB073	MSAD_247921.t1
	MsMYB192	MSAD_305689.t1
	MsMYB071	MSAD_247817.t1	Medtr5g088610.1
	MsMYB045	MSAD_237419.t1
	MsMYB189	MSAD_305090.t1
	MsMYB046	MSAD_237421.t1	Medtr1g083630.1
	MsMYB190	MSAD_305091.t1
	MsMYB020	MSAD_223018.t1
	MsMYB098	MSAD_258797.t1	Medtr3g052430.1
	MsMYB021	MSAD_223019.t1	Medtr3g052450.1
	MsMYB115	MSAD_269812.t1	Medtr8g042410.1
	MsMYB160	MSAD_293725.t1	Medtr3g011610.1
	MsMYB109	MSAD_265093.t1	Medtr1g021230.1
	MsMYB157	MSAD_292081.t1
	MsMYB123	MSAD_273786.t1
	MsMYB232	MSAD_317146.t1	Medtr4g063100.1
	MsMYB051	MSAD_239219.t1	Medtr2g096380.1
	MsMYB146	MSAD_284616.t1	Medtr1g062940.1
	MsMYB026	MSAD_224379.t1	Medtr1g045610.1
	MsMYB145	MSAD_284155.t1	Medtr1g073170.1
	MsMYB012	MSAD_219916.t1	Medtr7g035075.1
	MsMYB191	MSAD_305645.t1	Medtr6g006030.1
	MsMYB143	MSAD_284113.t1	Medtr1g086530.1
	MsMYB144	MSAD_284137.t1	Medtr1g086510.1
	MsMYB008	MSAD_218522.t1	Medtr2g033170.1
	MsMYB114	MSAD_269506.t1	Medtr4g123040.1
	MsMYB159	MSAD_293480.t1	Medtr1g110460.1
	MsMYB262	MSAD_330547.t1
H	MsMYB148	MSAD_286597.t1	Medtr2g088170.1	Asymmetric cell division; response to virus; response to salt stress; response to auxin; response to gibberellin; response to salicylic acid; response to jasmonic acid; polarity specification of adaxial/abaxial axis; leaf formation; defense response to bacterium; regulation of innate immune response
	MsMYB258	MSAD_328143.t1	Medtr4g029540.1, Medtr8g006470.1
	MsMYB201	MSAD_309145.t1	Medtr7g061550.1, Medtr7g061550.2
I	MsMYB011	MSAD_219217.t1	Medtr5g041570.1	Organ boundary specification between lateral organs and the meristem
	MsMYB094	MSAD_257905.t1	Medtr4g082040.1
	MsMYB119	MSAD_271073.t1
	MsMYB087	MSAD_254515.t1	Medtr3g089045.1
	MsMYB178	MSAD_300293.t1	Medtr6g074860.1
	MsMYB049	MSAD_239169.t1	Medtr7g086960.1
	MsMYB084	MSAD_251196.t1	Medtr6g027370.1
	MsMYB256	MSAD_327548.t1
	MsMYB257	MSAD_327549.t1
	MsMYB082	MSAD_251189.t1	Medtr6g027340.1
	MsMYB083	MSAD_251194.t1	Medtr6g027360.1
	MsMYB132	MSAD_278758.t1	Medtr4g019370.1
	MsMYB014	MSAD_221355.t1	Medtr5g082910.1
	MsMYB129	MSAD_276321.t1
	MsMYB193	MSAD_306126.t1	Medtr3g101290.1
	MsMYB003	MSAD_211637.t1	Medtr5g016510.1, Medtr6g015455.1
	MsMYB231	MSAD_317030.t1	Medtr4g094982.1
J	MsMYB106	MSAD_264483.t1	Medtr6g080360.1, Medtr6g080360.2	Pollen tube guidance; regulation of synergid differentiation
	MsMYB240	MSAD_321842.t1
	MsMYB185	MSAD_304403.t1
	MsMYB198	MSAD_308883.t1	Medtr5g010650.1
	MsMYB244	MSAD_322711.t1
	MsMYB031	MSAD_228963.t1	Medtr7g115550.1, Medtr7g115550.2
	MsMYB077	MSAD_249374.t1	Medtr8g468380.1
	MsMYB081	MSAD_250377.t1	Medtr5g038910.1, Medtr5g038910.2
	MsMYB058	MSAD_243604.t1	Medtr1g026870.1
	MsMYB161	MSAD_296112.t1	Medtr3g110028.1, Medtr3g110028.2
	MsMYB200	MSAD_309143.t1	Medtr7g061330.2
	MsMYB224	MSAD_315465.t1	Medtr7g061330.1, Medtr7g461410.1
	MsMYB080	MSAD_249909.t1	Medtr3g077650.1
	MsMYB248	MSAD_324388.t1	Medtr5g049190.1
	MsMYB135	MSAD_279740.t1	Medtr5g070020.1
	MsMYB214	MSAD_313487.t1	Medtr3g463400.1
	MsMYB121	MSAD_271910.t1	Medtr4g105660.1
	MsMYB086	MSAD_253210.t1
	MsMYB221	MSAD_315321.t1
	MsMYB029	MSAD_228784.t1	Medtr7g450950.1
	MsMYB183	MSAD_302335.t1	Medtr7g451170.1
	MsMYB182	MSAD_302329.t1
	MsMYB015	MSAD_221641.t1	Medtr4g088015.1
	MsMYB223	MSAD_315336.t1
	MsMYB037	MSAD_233524.t1	Medtr7g035350.1
	MsMYB222	MSAD_315326.t1
	MsMYB151	MSAD_287107.t1	Medtr1g057980.1
	MsMYB038	MSAD_233543.t1	Medtr7g037130.1
	MsMYB039	MSAD_233548.t1	Medtr7g037260.1
K	MsMYB217	MSAD_313735.t1		Response to salt stress; response to auxin; response to gibberellin response to salicylic acid; response to jasmonic acid; response to cadmium ion
	MsMYB218	MSAD_313736.t1
	MsMYB122	MSAD_273414.t1
	MsMYB219	MSAD_313740.t1
	MsMYB065	MSAD_246326.t1
	MsMYB068	MSAD_247767.t1
	MsMYB163	MSAD_297359.t1
	MsMYB265	MSAD_332735.t1	Medtr3g113680.1, Medtr7g109430.1
	MsMYB053	MSAD_239920.t1
	MsMYB154	MSAD_288307.t1	Medtr6g033350.1
	MsMYB226	MSAD_316695.t1
	MsMYB227	MSAD_316696.t1
	MsMYB176	MSAD_298692.t1
	MsMYB007	MSAD_218154.t1
	MsMYB055	MSAD_242993.t1
	MsMYB036	MSAD_233086.t1
	MsMYB235	MSAD_319397.t1	Medtr4g111975.1
L	MsMYB040	MSAD_233710.t1		Regulation of transcription, DNA-templated
	MsMYB076	MSAD_249275.t1
	MsMYB044	MSAD_236415.t1
	MsMYB225	MSAD_315751.t1	Medtr1g095570.1, Medtr1g095570.2
	MsMYB127	MSAD_275158.t1
	MsMYB188	MSAD_304655.t1
	MsMYB091	MSAD_256074.t1
	MsMYB104	MSAD_262748.t1
	MsMYB181	MSAD_302052.t1
	MsMYB128	MSAD_275163.t1
	MsMYB047	MSAD_238261.t1
	MsMYB179	MSAD_300436.t1
	MsMYB108	MSAD_264791.t1
	MsMYB237	MSAD_320771.t1
	MsMYB125	MSAD_274319.t1
	MsMYB105	MSAD_263886.t1
	MsMYB158	MSAD_292993.t1
	MsMYB162	MSAD_296412.t1
	MsMYB197	MSAD_308563.t1
	MsMYB172	MSAD_298601.t1
	MsMYB174	MSAD_298609.t1
	MsMYB175	MSAD_298611.t1
	MsMYB173	MSAD_298605.t1
	MsMYB207	MSAD_312392.t1
	MsMYB233	MSAD_318299.t1
	MsMYB070	MSAD_247772.t1
	MsMYB215	MSAD_313730.t1
	MsMYB216	MSAD_313734.t1
	MsMYB124	MSAD_274216.t1
	MsMYB067	MSAD_247739.t1
	MsMYB259	MSAD_328445.t1
	MsMYB043	MSAD_235749.t1
	MsMYB206	MSAD_312008.t1
	MsMYB180	MSAD_300634.t1
	MsMYB213	MSAD_313446.t1
	MsMYB118	MSAD_270934.t1
	MsMYB019	MSAD_222259.t1
	MsMYB035	MSAD_232883.t1
	MsMYB195	MSAD_306780.t1
	MsMYB204	MSAD_310752.t1
	MsMYB103	MSAD_262251.t1
	MsMYB107	MSAD_264790.t1
	MsMYB253	MSAD_326870.t1
	MsMYB249	MSAD_325491.t1	Medtr8g063600.1
	MsMYB242	MSAD_322667.t1	Medtr8g063870.1
	MsMYB243	MSAD_322686.t1
	MsMYB041	MSAD_234746.t1	Medtr1g111830.1
	MsMYB255	MSAD_327363.t1
	MsMYB112	MSAD_267527.t1	Medtr7g067080.1
	MsMYB062	MSAD_245082.t1
	MsMYB063	MSAD_245196.t1	Medtr3g462790.1
	MsMYB134	MSAD_279707.t1	Medtr5g069710.1
